# Supplementary material
Source: publisher figshare collection journal article supplement (https://geolsoc.figshare.com/ndownloader/files/24065065)
Supplement: Supplementary file 1 [file 24065065]

## Sheet: SW15-12
	Time [Sec]	distance	distance through grt (mm)		MgO	SiO2	P2O5	K2O	CaO	TiO2	Cr	FeO	Rb	Sr	Zr	Ce	Nd	Sm	Eu	Gd	Dy	Er	Yb	Lu	Hf	Pb	Th	U
sw15-12	2801.41	28.0141	0		3.62228	37	0.0291222	0.0849866	6.53845	0.275144	5.85331	1.18676	9.83412	3.62594	4.61443	3.37632	0.234456	0.121779	0.195849	0.0945092	5.48793	7.92755	6.02589	3.84243	0.056798	13.8168	0.0712301	0
sw15-12	2802.01	28.0201	0.006048		3.83447	37	0.0144818	0.0628311	7.83131	0.575238	3.08818	1.17683	6.93766	3.33477	5.60265	2.26755	0.183569	0.0710236	0.0665004	0.0965184	5.09498	8.52389	6.64948	5.25694	0.111869	11.0785	0.0484963	0.0122572
sw15-12	2802.62	28.0262	0.0121		3.81991	37	0.0109872	0.0429821	6.66248	0.782201	2.63229	1.20479	4.91056	2.27945	7.33105	1.95712	0.135698	0.106599	0.0442534	0.180997	6.03653	8.69601	7.30511	5.40265	0.178185	8.64812	0.0485018	0.0122586
sw15-12	2803.22	28.0322	0.018152		3.83429	37	0.00807644	0.0293478	6.8011	0.925015	2.86227	1.21108	3.64391	1.69543	7.01627	1.69569	0.108925	0.0865714	0.0648278	0.0940908	6.26621	9.69977	7.67268	5.95571	0.19388	5.47534	0	0.0716935
sw15-12	2803.83	28.0383	0.024209		4.03949	37	0.00498117	0.0250693	7.01163	0.902715	1.084	1.27782	2.34814	1.1217	7.00658	0.817913	0.054488	0.0692694	0.021453	0.0706009	5.31324	10.5111	7.77983	5.51625	0.121231	5.47789	0	0.0119545
sw15-12	2804.44	28.0444	0.030262		4.03821	37	0.0132314	0.0184398	7.19051	0.671296	-0.310996	1.21782	3.07755	0.822175	5.59371	0.783407	0.0372781	0.0663471	0.020548	0.056352	5.30881	9.53471	6.54228	5.02092	0.100633	4.50969	0.0226516	0
sw15-12	2805.04	28.0504	0.036311		3.96519	37	0.0095623	0.0151394	7.36875	0.600168	0.490049	1.25016	1.87594	1.38819	4.49226	0.683155	0.0405095	-8.64488e-05	0.0562556	0.0510307	4.44271	8.39304	6.28381	4.29366	0.0455644	4.29743	0	0
sw15-12	2805.64	28.0564	0.042359		3.96642	37	0.0169411	0.014901	7.16394	0.227542	1.64347	1.2378	1.65109	0.516485	3.30871	0.39883	0.0241137	0.0267848	0.134269	0.118471	4.67754	8.0543	6.1589	3.64886	0.0219068	3.62259	0	0.00925832
sw15-12	2806.25	28.0625	0.048411		4.0132	37	0.00385076	0.0169754	7.1893	0.122948	0.573068	1.21876	1.55156	0.642139	2.80757	0.440932	0.0453205	0.0377916	0.0787918	0.171279	6.06538	7.77129	5.52382	3.42891	0.0294091	3.78508	0.034423	0.0174005
sw15-12	2806.86	28.0686	0.054468		3.67818	37	0.0154301	0.0120049	6.30317	0.0723452	0.482613	1.09468	2.02773	0.354058	2.56637	0.532919	0.0210672	-6.74374e-05	0.0438841	0.0716565	3.82787	7.39441	5.41583	3.7324	0.0328099	3.4565	0	0
sw15-12	2807.46	28.0746	0.06052		3.08219	37	0.0128921	0.0123115	5.73561	0.0374749	0.201892	0.937986	1.82085	0.661088	3.13644	0.107118	0.022938	-5.87408e-05	0.0638062	0.0693507	4.21312	7.24442	4.83951	3.56384	0.0381051	3.91794	0.013938	0.00704553
sw15-12	2808.07	28.0807	0.066573		2.38856	37	0.00516621	0.00777644	4.34414	0.0179488	-0.163658	0.741668	0.84102	0.577443	2.14684	0.290106	0.0117703	0.0261732	0.0764462	0.0118618	3.6417	5.94312	3.97353	2.86063	0.026478	2.62141	0	0.0060255
sw15-12	2808.67	28.0867	0.072618		1.77673	37	0.00555372	0.00513686	3.38852	0.00964128	0.109138	0.543757	0.753783	0.40741	1.37891	0.160117	0.00949476	-4.05244e-05	0.0175467	0.0382744	2.40906	3.95701	3.20534	2.41908	0.0147871	2.11462	0	0
sw15-12	2809.28	28.0928	0.07867		1.50153	37	0.0039733	0.00325833	2.71472	0.00598665	0.125221	0.452723	0.451864	0.340029	1.35334	0.177173	0.0085362	-3.64332e-05	0.0395749	0.0387125	1.83042	3.54735	2.65457	1.71255	0.125564	1.9349	0.0259346	0.00436989
sw15-12	2809.88	28.0988	0.084722		1.20866	37	0.00324848	0.00168462	2.11886	0.00433956	0.377832	0.387771	0.333969	0.432691	14.3129	0.168938	0.00813945	0.0120547	0.0831225	0.0123041	1.9719	2.76193	2.27851	1.58672	0.156354	1.52309	0.0164861	0.00833357
sw15-12	2810.49	28.1049	0.090779		1.09199	37	0.00380344	0.00156867	1.91337	0.00396411	0.194918	0.353563	0.138762	0.271367	9.82618	0.0836052	0.0134273	0.0298808	0.0223758	0.0202976	1.5033	2.70495	2.15404	1.50951	0.0864385	0.881069	0.0326357	0.00412427
sw15-12	2811.09	28.1109	0.096831		1.09994	37	0.00135544	0.00155377	1.9772	0.0030416	-0.216101	0.35838	0.107679	0.365205	5.0636	0.0737598	0.0162461	-3.46698e-05	0.0301102	0.00818622	1.1035	3.01761	2.22589	1.70349	0.0716905	1.18812	0.0904925	0.00415839
sw15-12	2811.7	28.117	0.102876		1.16353	37	0.00269562	0.000444071	2.15076	0.00290721	0.0166191	0.386958	0.11185	0.249615	3.56706	0.1204	0	-3.60126e-05	0.0234348	0.0467689	1.58826	3.34557	2.33704	2.00594	0.0423435	0.922766	0.00854506	0.0129583
sw15-12	2812.3	28.123	0.108929		1.41227	37	0.00710723	0.00103107	2.90199	0.00297195	0.231053	0.472301	0.151854	0.26294	2.43603	0.148659	0.0127332	0.00705143	0.0176486	0.0433098	1.71945	3.96861	3.31573	2.57058	0.0297465	1.27095	0	0
sw15-12	2812.91	28.1291	0.114981		1.8147	37	0.00372735	0.00224618	3.35728	0.00378414	0.335462	0.594946	0.42158	0.178561	2.21647	0.14247	0.0183047	0.00810945	0.0305037	0.0442729	2.24715	4.61641	3.87819	2.66093	0.011403	1.30243	0	0
sw15-12	2813.51	28.1351	0.121038		2.31413	37	0.0116273	0.0163737	4.00407	0.00433005	0.347108	0.750686	2.78531	0.128197	1.72225	0.131611	0.00422744	0.0282012	0.0234374	0.0511238	3.52931	6.05606	4.34705	3.31767	0.0131675	1.50397	0	0.0129848
sw15-12	2814.12	28.1412	0.12709		2.70964	37	0.0104125	0.0231777	5.1973	0.00530013	0.400803	0.913473	4.03002	0.133019	2.23235	0.132974	0.00976278	-6.25024e-05	0.081502	0.0590323	3.61968	6.80095	5.95067	3.98621	0.0177385	1.38924	0	0
sw15-12	2814.72	28.1472	0.133142		3.17791	37	0.00574547	0.0260818	5.86512	0.00597112	0.742312	1.05685	4.61235	0.0960807	1.7725	0.186697	0.0533042	-6.8252e-05	-0.000170824	0.112811	3.87411	7.67426	5.05568	3.81987	0.0193703	1.81207	0	0
sw15-12	2815.33	28.1533	0.139187		3.46556	38	0.00580143	0.0270128	6.72057	0.00700705	1.66196	1.16287	4.9757	0.0851865	10.8174	0.0665229	0	0.0380117	0.015704	0.0689084	3.97336	7.42958	5.32854	3.59777	0.423042	1.17113	0	0.0262528
sw15-12	2815.93	28.1593	0.14524		3.84396	39	-0.000714793	0.0230285	7.37114	0.00756507	0.562755	1.23708	5.21656	0.148466	98.5215	0.071699	0.0184242	-7.8636e-05	0.10254	0.13926	4.46352	7.37112	5.67505	4.36615	8.6955	1.675	0.0373175	0.122615
sw15-12	2816.54	28.1654	0.151292		3.96493	40	0.0123203	0.0194294	7.63346	0.00811981	0.947831	1.31955	3.21114	0.0952394	1589.11	0	0	0.0141114	0.088603	0.0288901	5.25586	9.80927	9.34901	6.48373	64.9176	2.41751	0.329037	0.851288
sw15-12	2817.14	28.1714	0.157349		4.05791	41	0.00293057	0.0141483	7.94514	0.0087172	1.79442	1.30766	2.22142	0.212421	4101.38	0.0247501	0	0.0140881	0.0707243	0.0384564	5.30964	12.067	9.4041	8.43973	90.795	2.36322	1.31408	0.830338
sw15-12	2817.75	28.1775	0.163401		4.28143	42	0.00514463	0.00772816	8.06447	0.00886164	2.68601	1.39566	1.88243	0.101286	4715.23	0	0.0203248	0.0150074	0.0753394	0.133141	5.72268	13.9689	12.3336	10.2232	83.9997	2.3835	1.62629	0.853298
sw15-12	2818.35	28.1835	0.169449		4.47802	43	0.00462804	0.00271509	7.9534	0.00991398	1.7117	1.41709	1.00253	0.320538	4159.36	0.0272953	0.0140279	-8.98086e-05	0.0779975	0.180252	7.50962	16.2931	14.1548	12.044	67.4812	2.68944	1.89682	0.689467
sw15-12	2818.96	28.1896	0.175498		4.46023	44	0.0107747	0.00361408	8.42385	0.0113847	1.14025	1.49137	1.05807	0.0633861	3083.72	0.0280294	0.00720261	-9.2224e-05	0.0399322	0.11977	6.65005	17.5301	16.1193	14.2448	42.8153	2.33462	1.4663	0.564186
sw15-12	2819.56	28.1956	0.181551		4.72457	45	0.0152573	0.00147199	8.78788	0.0124888	1.08445	1.46672	0.434458	0.131379	1831.49	0.0283645	0	-9.33265e-05	0.020088	0.0661087	7.15924	18.1569	17.2835	13.9837	24.7423	2.4778	0.797246	0.47017
sw15-12	2820.17	28.2017	0.187608		4.69157	46	0.0127878	0.00363019	9.17811	0.0142529	0.475727	1.53502	0.629296	0.135985	1114.43	0.0587178	0	0.285648	0.0207922	0.102642	6.78016	18.1996	17.9564	14.6886	14.5182	1.22252	0.435509	0.196971
sw15-12	2820.77	28.2077	0.19366		4.85189	47	0.00751426	0.00238619	8.9184	0.0130961	2.16707	1.62052	0.457823	0.303768	611.026	0.0298899	0.0153614	-9.83455e-05	-0.000246143	0.116109	6.78961	16.3859	17.7693	13.888	7.93423	1.42681	0.256694	0.176942
sw15-12	2821.38	28.2138	0.199712		4.86687	48	0.012977	0.00118629	9.04108	0.0115731	1.35786	1.58114	0.729739	0.114456	312.401	0.0595865	0.00765586	0.0169587	0.0637902	0.10416	7.21896	15.9495	16.3684	13.2072	4.00515	0.877432	0.0930397	0.0940614
sw15-12	2821.98	28.2198	0.20576		4.84115	49	0.00965005	-0.000760899	9.23492	0.0115552	0.417583	1.63129	0.495906	0.116617	171.886	0	0	0.0346577	0.0867426	0.117918	6.35895	18.2037	17.613	13.3767	1.97682	0.30815	0.0710971	0
sw15-12	2822.59	28.2259	0.211809		3.82623	37	0.0087943	0.000137711	7.48806	0.00853664	1.07118	1.26543	0.144326	0.0531504	71.2075	0	0	0.0537454	0.0166452	0.0821696	5.81355	13.7271	12.6578	9.77988	0.956481	0.26246	0.0366984	0.0278261
sw15-12	2823.19	28.2319	0.217857		3.95683	37	0.014099	-0.00115834	7.38464	0.00797533	-0.0801203	1.25482	0.194095	-0.00258598	31.7056	0	0	-7.80717e-05	0.0338044	0.10139	5.18027	13.7058	13.3071	11.1152	0.53817	0.144465	0.0370497	0
sw15-12	2823.8	28.238	0.223919		3.80516	37	0.0121421	-0.00122845	7.49056	0.00861462	0.268018	1.23089	0.169705	0.0910492	25.8719	0	0	0.0677649	0.0167848	0.0368254	6.34104	12.6006	14.3062	10.9774	0.265591	0.144295	0.0370063	0
sw15-12	2824.41	28.2441	0.229971		3.94908	37	0.0117458	-0.000706643	7.06775	0.00841105	0.328513	1.27118	-0.0237878	0.0728734	25.5244	0	0	-7.8574e-05	0.0340219	0.0556586	6.17828	15.4185	15.0695	11.4381	0.238939	-0.0001394	0	0
sw15-12	2825.01	28.2501	0.236018		3.88485	37	0.00790958	-0.000353292	7.05473	0.00888198	1.02364	1.26556	0.0247549	0.147443	14.8152	0	0	-7.80938e-05	0.492948	0.101419	4.97201	14.7787	14.4896	11.4792	0.129818	0.0239688	0	0
sw15-12	2825.62	28.2562	0.242071		3.98334	37	0.013143	0.000103353	6.78022	0.00875598	0.268647	1.28187	0.0489972	0.110033	16.6122	0	0	0.0135223	-0.00019563	0.0922814	5.66616	14.5735	13.743	10.8435	0.174304	0.0963766	0.0185466	0
sw15-12	2826.22	28.2622	0.24812		4.18522	37	0.00964446	-0.000270301	6.92024	0.00834212	0.899381	1.31491	0.120469	0.0531971	8.70404	0	0	0.0403251	0.0503668	0.0365511	5.67018	13.7824	13.2193	11.2121	0.112973	0.167118	0.0183653	0
sw15-12	2826.83	28.2683	0.254178		4.00079	37	0.0180316	-0.000738834	7.06342	0.00835557	1.29962	1.28974	-0.0233815	0.0159886	6.07225	0	0	-7.7232e-05	0.0670749	0.054708	4.97641	14.4862	12.9496	10.1104	0.078283	0.11907	0	0.00926342
sw15-12	2827.43	28.2743	0.26023		3.95481	37	0.0136698	-0.00107274	7.41885	0.00845721	0.613883	1.27492	0.193179	0.0534057	5.44222	0	0	-7.77029e-05	0.101323	0.119259	4.94712	11.9915	12.0717	10.0892	0.0913629	0.143782	0.0184373	0
sw15-12	2828.04	28.2804	0.266282		3.90123	37	0.0108971	0.00031327	7.19916	0.0076108	3.06756	1.25867	0.048203	0.126716	8.93777	0	0	0.0266831	0.0165515	0.0726271	5.89885	13.5424	11.6663	9.12371	0.118475	-0.0238741	0	0
sw15-12	2828.64	28.2864	0.272329		3.87308	37	0.0170926	-0.000212401	6.78879	0.00766233	-0.0213855	1.24803	0.0474737	0.0520517	7.29441	0	0	0.0131018	0.0327917	0.0715282	5.43187	12.7663	11.2009	8.96548	0.073693	0.327175	0	0
sw15-12	2829.25	28.2925	0.278382		3.93677	37	0.00486756	-0.000300622	6.74162	0.00803988	0.997405	1.24386	0.0476988	0.0157526	5.36899	0.0231265	0.0118855	0.026404	0.0163784	0.0539005	5.22408	12.2743	12.5077	9.58257	0.0555322	0.728075	0	0
sw15-12	2829.85	28.2985	0.284439		3.94238	37	0.0139852	-0.000593736	7.2714	0.00801869	1.86325	1.2637	0.0957136	0.163405	4.76353	0.16335	0.00599648	0.013283	0.0332452	0.0453234	5.50699	12.9858	12.0615	9.36912	0.0684863	1.32729	0	0
sw15-12	2830.46	28.3046	0.290489		3.93668	37	0.0180245	-0.00107634	6.97242	0.00822821	0.719986	1.25423	0.000546269	0.0711267	4.40397	0.20978	0.0239579	0.0132675	-0.000191945	0.0905427	4.32368	13.6348	14.0563	10.4552	0.0435305	1.72828	0.0181971	0
sw15-12	2831.06	28.3106	0.296541		4.0057	37	0.0123266	0.00095707	7.18243	0.00794133	0.613188	1.27792	0.096754	0.0719839	5.63796	0.377439	0.018185	0.0134274	0.0674075	0.100797	4.88198	14.1677	13.512	11.4157	0.0692307	1.43757	0.0184165	0
sw15-12	2831.67	28.3167	0.302588		3.90656	37	0.0134772	-0.000209784	7.37964	0.00806841	0.55811	1.27774	0.0247211	0.0536009	6.5577	0.165917	0.0243629	-7.7987e-05	0.0507492	0.0552428	6.16205	15.3033	13.915	12.226	0.0664007	1.37223	0	0
sw15-12	2832.27	28.3227	0.30864		4.00874	37	0.00361679	0.000632948	6.95922	0.00785791	0.552253	1.26007	0.0244616	0.0901014	3.8495	0.117268	0.0060268	0.0402048	0.0166101	0.0911069	4.58746	14.4743	16.2331	12.4612	0.0657039	1.07192	0	0
sw15-12	2832.88	28.3288	0.314693		3.89482	37	0.00957967	-0.00115583	6.7962	0.00701429	0.425191	1.26596	-0.022708	0.015528	4.59014	0.45595	0.0234321	-7.50074e-05	-0.000187732	0.123977	4.86184	14.4462	15.1796	12.1589	0.0212875	0.717696	0	0
sw15-12	2833.48	28.3348	0.32075		3.79896	37	0.0138608	-0.000138895	6.40291	0.00671335	1.12876	1.31969	0.0233255	0.0682457	3.00114	0	0	-7.35843e-05	0.0799297	0.0955626	5.24952	15.8787	17.1783	12.2422	0.0447507	0.340608	0.0523802	0
sw15-12	2834.09	28.3409	0.3268		3.7153	37	0.0137886	0.000285112	6.85876	0.00726821	1.05106	1.25209	0.067455	0.0149078	4.12591	0.0437727	0.0112481	0.012458	0.0625411	0.0170034	5.27548	13.4869	15.3983	12.0382	0.0671523	0.377792	0	0
sw15-12	2834.69	28.3469	0.332847		3.84221	37	0.0124758	-0.000897017	6.98208	0.00682684	0.854247	1.27848	0.205548	0.0505275	4.0878	0.0446867	0	-7.35153e-05	-0.000183997	0.0867938	5.86513	15.946	14.9414	12.4399	0.116246	0.317594	0	0
sw15-12	2835.3	28.353	0.338899		3.91585	37	0.00884237	-0.00145496	6.77992	0.00733972	0.304284	1.26487	0.0681737	0.0150667	3.09127	0	0	0.0125908	0.0156653	0.0773322	5.1083	13.8746	14.6907	11.2284	0.0413101	0.56156	0	0
sw15-12	2835.9	28.359	0.344952		3.88358	37	0.00867569	-0.00128036	7.13568	0.00768926	1.12413	1.2846	0.0459377	0.015171	5.71407	0	0	0.0126779	0.0157737	0.0432587	5.79035	14.1549	14.7161	11.7686	0.0386249	0.746442	0	0
sw15-12	2836.51	28.3651	0.351009		4.30045	37	0.0212363	-0.00103263	6.88742	0.00825012	1.26193	1.24276	0.0895263	0.0838529	3.39582	0.0218272	0	-7.18169e-05	0.0467341	0.07631	5.37143	13.5708	13.811	12.0184	0.0524122	0.908892	0	0
sw15-12	2837.11	28.3712	0.357061		3.77054	37	0.0214617	-0.000577883	7.22442	0.00805942	-0.182462	1.25475	0.0904768	0.102173	3.24318	0.176471	0	0.0125562	0.0156223	0.0599811	5.90186	13.5932	14.3229	12.3525	0.0294264	1.52358	0	0
sw15-12	2837.72	28.3772	0.363111		3.97478	37	0.01056	0.000925816	7.56499	0.00879225	1.95323	1.29149	0.114725	0.0683612	3.49486	0.112011	0.0172698	-7.37088e-05	0.112165	0.0435103	5.28669	16.4618	17.1178	12.8527	0.0268958	1.77488	0	0
sw15-12	2838.32	28.3832	0.369158		3.75724	37	0.0205419	-0.000314582	7.32798	0.00850455	0.404434	1.24028	0.0226158	0.0490363	4.17124	0.238527	0.0501483	-7.13457e-05	0.0464274	0.0252692	5.71941	17.5694	15.2683	13.9697	0.0318188	1.98233	0	0
sw15-12	2838.93	28.3893	0.37521		3.84256	37	0.00534167	0.000288538	7.66861	0.0218483	1.11791	1.24708	0.136012	0.0500887	3.26594	0.332248	0.0113832	0.0506494	0.0474238	0.0860401	5.36682	16.1334	16.5829	14.3019	0.0472751	4.09544	0.0345844	0
sw15-12	2839.54	28.3954	0.381263		3.6733	37	0.0123487	-0.000598898	7.40042	0.211225	0.676938	1.22153	0.0675427	0.58637	4.5907	0.89856	0.0563136	0.0501132	0.0469217	0.102155	5.78031	15.3782	15.0679	12.8744	0.146177	6.1904	0.0684365	0.00864851
sw15-12	2840.14	28.4014	0.38732		4.15594	37	0.00209038	0.00240995	7.33159	0.665604	0.971136	1.26972	0.276022	0.958371	8.8139	1.32864	0.0752208	0.0643825	0.0320795	0.0874701	6.42253	16.9607	16.3311	12.2338	0.258343	7.23049	0	0
sw15-12	2840.75	28.4075	0.393372		4.214	37	0.00541759	0.00345464	6.95897	1.15216	1.2459	1.24013	0.659666	1.2578	13.1001	1.35776	0.0553759	-7.09047e-05	0.154215	0.0920826	5.16717	13.8541	14.817	11.5001	0.414006	7.27036	0.0168242	0.017009
sw15-12	2841.35	28.4135	0.399417		3.88283	37	0.00784766	0.00728889	7.07637	1.75518	1.42504	1.25044	0.736373	1.89875	14.6085	1.0061	0.140501	0.0625324	0.0938332	0.135931	5.46488	15.1258	13.701	10.635	0.399735	7.37847	0.0341489	0.0517858
sw15-12	2841.96	28.4196	0.405469		3.66369	37	0.0126808	0.00835315	6.99083	1.65476	2.98527	1.14245	0.976233	2.38168	16.3877	1.08188	0.0962282	0.142855	0.0445431	0.0565684	5.48728	12.0549	11.3465	9.27091	0.349709	5.94003	0.0324836	0.0164202
sw15-12	2842.56	28.4256	0.411521		4.13635	37	0.0169407	0.00946951	7.48097	1.76576	3.0287	1.26723	1.10032	2.17568	14.8791	1.07868	0.129347	0.0685333	0.12001	0.139665	6.08009	12.7876	13.0592	9.82662	0.284592	5.7474	0.0561389	0.00945922
sw15-12	2843.17	28.4317	0.417578		4.01793	37	0.0108262	0.00724603	6.98987	1.33401	2.39173	1.24257	0.862267	1.59289	11.6137	0.986069	0.0784247	0.0536844	0.151183	0.0911956	5.42168	12.158	12.1879	8.89732	0.263083	4.69872	0	0
sw15-12	2843.77	28.4377	0.423631		4.08925	37	0.014295	0.00517081	6.98557	0.82821	0.874608	1.24975	0.676929	0.7567	8.75824	0.480408	0.07054	0.0130213	0.0489795	0.124407	6.0627	12.814	11.9544	8.94382	0.122069	3.25345	0	0
sw15-12	2844.38	28.4438	0.429683		4.0201	37	0.0108664	0.00422265	6.81812	0.462475	0.862624	1.25766	0.644649	0.532382	7.68159	0.225629	0.0289889	0.0257599	0.0159789	0.0525859	6.179	13.2606	11.3528	8.97293	0.081266	2.20018	0.0176147	0
sw15-12	2844.98	28.4498	0.435728		4.08908	37	0.0103174	0.00180829	7.48355	0.327031	0.575191	1.26803	0.0456386	0.382241	5.34541	0.132766	0.0454884	-7.28055e-05	-0.000182221	0.0773604	6.89802	13.839	10.9825	8.4055	0.0796998	1.79808	0	0
sw15-12	2845.59	28.4559	0.44178		3.84908	37	0.0159173	0.000331264	7.11831	0.13528	0.653103	1.18707	0.0436082	0.365236	5.68674	0.190293	0.0217323	-6.95665e-05	0.0149738	0.131411	5.47002	12.0961	9.84253	7.2345	0.0592312	1.30998	0	0
sw15-12	2846.19	28.4619	0.447837		4.02192	37	0.0137717	-0.000333724	6.86115	0.0677657	0.972567	1.19257	0.131039	0.183149	2.84536	0.0213395	0.010967	0.0854484	0.122133	0.116051	5.17059	12.6399	10.494	7.02731	0.0626278	0.845232	0.01666	0
sw15-12	2846.8	28.468	0.45389		3.76499	37	0.00461733	-0.000643586	6.88389	0.0355899	1.28223	1.17924	0.000479204	0.175488	2.5777	0.0613406	0.00525416	0.0116387	0.0144807	0.0873695	5.7287	12.036	9.09848	7.0082	0.0981956	0.685254	0	0
sw15-12	2847.4	28.474	0.459942		4.30962	37	0.0087418	-0.000791009	7.6786	0.0273925	0.52844	1.30991	0.137811	0.103949	3.38594	0.067327	0.00576692	-7.38411e-05	0.0480512	0.0871784	6.00445	11.9937	10.7034	7.87577	0.0149689	1.07129	0.017521	0
sw15-12	2848.01	28.4801	0.465987		4.28342	37	0.00906256	-0.00140071	7.02918	0.016025	1.16567	1.25056	0.0434234	0.0309757	1.99701	0.0210536	0	0.011984	0.0601615	0.089962	5.28737	11.5417	10.2813	6.63173	0.0112341	4.96271	0	0
sw15-12	2848.61	28.4861	0.472039		3.99548	37	0.00722675	0.00177219	6.85111	0.0180264	0.40447	1.24215	0.0226179	0.134714	3.52224	0.151801	0.0390077	0.0247591	0.0464315	0.0421191	6.45913	12.8451	9.4024	6.58382	0.0925742	15.6993	0	0
sw15-12	2849.22	28.4922	0.478091		3.85289	37	0.00815718	0.00221451	6.696	0.0169685	1.03991	1.27096	0.220849	0.277348	15.3614	0.216164	0.040397	0.0336861	-0.000161825	0.0839685	5.67937	11.5494	8.47529	6.36217	0.131076	25.9775	0	0.0077551
sw15-12	2849.82	28.4982	0.484148		4.12996	37	0.0143522	0.00139529	7.43005	0.0241355	1.8794	1.33529	0.308187	0.50862	15.0179	0.883824	0.0664682	-7.09228e-05	0.0615955	0.133974	6.66521	12.5102	8.94013	6.62609	0.195541	36.3018	0	0
sw15-12	2850.43	28.5043	0.490201		3.66704	37	0.00406543	0.0027695	6.55153	0.0262344	1.53221	1.16244	0.28304	0.623554	10.939	1.1087	0.101743	0.0112685	0.0282033	0.146113	5.64648	10.1977	8.74136	6.54236	0.108278	50.659	0.0154554	0.0156251
sw15-12	2851.03	28.5103	0.496253		4.22479	37	0.0108909	0.00500991	7.47796	0.0340309	1.57178	1.21344	0.662801	0.791163	8.91981	0.925271	0.116346	0.0112051	0.211389	0.0688217	6.80774	11.7144	8.43395	6.30426	0.057773	57.9126	0.0153685	0.0388432
sw15-12	2851.64	28.5164	0.502298		4.30345	37	0.0111226	0.00514316	7.07866	0.144336	0.883396	1.24018	0.940289	0.98509	6.74559	2.06908	0.100007	0.0468391	0.146581	0.111394	6.48878	12.7163	9.47678	7.23605	0.194011	71.5583	0.0159913	0.0242504
sw15-12	2852.24	28.5224	0.50835		4.09867	37	0.0102284	0.00619588	6.46192	0.723738	1.785	1.15344	0.59337	1.14671	10.8275	1.86113	0.134491	-6.37788e-05	0.0831663	0.173189	6.75255	13.7272	9.20061	7.01779	0.284464	63.6231	0.0302668	0.0152996
sw15-12	2852.85	28.5285	0.514407		4.17448	37	0.0146194	0.00883586	7.49998	1.51243	2.27446	1.26484	0.782389	1.46216	16.8256	1.72563	0.114952	0.0852971	0.182962	0.107571	7.23226	12.8525	9.56392	7.905	0.383657	59.0243	0	0.0168131
sw15-12	2853.45	28.5345	0.520459		3.52048	37	0.0109509	0.0106995	5.87574	2.03284	1.72784	1.03753	1.29022	1.11027	21.5421	1.21162	0.0549381	0.0407409	0.114732	0.0761288	5.50901	10.3401	7.47059	5.53393	0.456384	34.0613	0	0
sw15-12	2854.06	28.5406	0.526512		4.17702	37	0.00758124	0.0140774	6.80563	3.34547	2.63661	1.29658	1.17842	1.75023	26.0365	1.38637	0.106869	0.105743	-0.000190264	0.134626	6.21073	12.2625	8.04103	6.08982	0.687419	31.2495	0	0
sw15-12	2854.66	28.5466	0.532559		4.45684	37	0.0042446	0.0294306	6.96681	3.974	2.79552	1.21421	0.66421	1.57984	34.378	1.25178	0.083627	0.0715775	0.197082	0.136142	6.06574	10.4343	7.17131	5.38473	0.885135	26.2298	0	0.0296382
sw15-12	2855.27	28.5527	0.538609		4.76201	37	0.0150288	0.0269333	7.97712	4.58916	2.75744	1.40468	0.620436	1.93959	37.3338	1.74462	0.101879	0.105837	0.0187188	0.174545	6.47105	9.3171	7.16485	4.66656	0.874578	19.8072	0.0206351	0.0521542
sw15-12	2855.88	28.5588	0.544661		4.02492	37	0.0153781	0.0138083	6.15647	4.41344	1.64388	1.18336	0.515048	2.03083	37.6486	1.43817	0.0907622	0.0721357	0.108243	0.156806	5.38056	8.15186	6.12011	4.18916	0.649639	13.8999	0.137876	0.0398258
sw15-12	2856.48	28.5648	0.550718		4.09741	37	0.00541631	0.00894707	6.66166	4.1365	2.81068	1.24683	0.394162	2.41722	34.452	1.38973	0.105803	0.014648	0.184156	0.099964	4.80606	8.8349	6.09589	4.53591	0.769084	14.3089	0.0602718	0.0406225
sw15-12	2857.09	28.5709	0.55677		3.89597	37	0.0122032	0.00758303	6.04832	3.34789	1.94082	1.17152	0.505516	2.66269	26.0494	1.03777	0.0545429	0.202453	0.0504959	0.100775	5.1786	7.55538	6.54095	4.6597	0.682812	12.5618	0.0368248	0.0372292
sw15-12	2857.69	28.5769	0.562818		3.89535	37	0.0109124	0.00700774	6.31515	3.28739	1.32403	1.1551	1.02795	2.07875	25.5612	2.51953	0.123584	0.0654799	0.0490337	0.151234	6.35853	9.56642	7.25226	5.30053	0.55914	13.5727	0.0357585	0.0813419
sw15-12	2858.3	28.583	0.56887		4.28113	37	0.00558792	0.0140471	6.36582	3.05266	2.19037	1.37937	2.43407	1.64536	24.4759	2.31736	0.136944	0.0397192	0.149212	0.198016	5.76047	11.3607	7.68092	6.18844	0.646098	15.7363	0.0542681	0.0822978
sw15-12	2858.9	28.589	0.57492		4.1296	37	0.00833891	0.01605	6.47496	3.45505	2.26138	1.2718	3.04971	1.96339	31.8505	2.00964	0.159825	0.0410068	0.085495	0.102216	7.27602	11.9708	8.44818	6.41002	0.817074	14.2017	0.0373515	0.0944062
sw15-12	2859.51	28.5951	0.580977		4.41421	37	0.00938409	0.021363	6.68002	4.90974	2.21845	1.27119	2.82565	2.8342	32.5334	2.55405	0.148578	0.0964672	0.0688418	0.1123	6.62811	11.5908	8.76914	6.6244	0.842163	16.1411	0	0.0570446
sw15-12	2860.11	28.6011	0.587029		4.38764	37	0.0162588	0.0241768	6.84581	4.54473	1.54363	1.23141	3.45518	2.8245	35.3118	2.70115	0.328745	0.0677366	0.169534	0.20246	7.20576	12.4865	7.86685	5.75996	0.866091	16.0413	0.0924771	0.0280478
sw15-12	2860.72	28.6072	0.593081		4.70341	37	0.00842824	0.0242443	6.98247	4.58526	3.12755	1.28561	3.79119	2.80324	35.4654	2.3593	0.195941	0.163621	0.18759	0.101817	6.34512	11.9678	8.5918	6.2945	0.861581	12.6674	0	0.0282107
sw15-12	2861.32	28.6132	0.599129		4.74537	37	0.0214124	0.0225734	6.65705	3.99793	2.77297	1.27745	3.81421	2.29578	31.8156	2.49351	0.133474	0.0445194	0.148638	0.141237	7.66976	13.3303	9.40878	6.48121	0.706853	11.6403	0.0608266	0.0614945
sw15-12	2861.93	28.6193	0.605181		4.75486	37	0.0149656	0.0167356	6.87654	3.02362	1.87161	1.3165	2.3941	1.55618	22.5457	2.07289	0.134756	0.128585	0.0713573	0.0970033	7.53237	13.2076	9.78732	7.59595	0.449754	10.3545	0.0974779	0.00985484
sw15-12	2862.53	28.6253	0.611231		4.42019	37	0.00900282	0.0115814	7.08919	2.20469	1.81266	1.24353	1.45722	0.922757	15.1211	1.03055	0.150456	0.120596	0.0837029	0.172857	6.67998	12.6238	9.53984	6.81612	0.22183	8.09179	0	0.0184851
sw15-12	2863.14	28.6314	0.617288		4.69245	37	0.00222586	0.00915031	6.98856	1.10981	1.09133	1.31244	0.996859	0.841491	9.19686	1.04541	0.140151	0.0519655	0.0649371	0.0706191	6.88335	12.2699	8.06444	6.06945	0.157642	5.65692	0.0177415	0
sw15-12	2863.74	28.6374	0.62334		4.24612	37	0.0155082	0.00533271	7.1883	0.888973	1.03871	1.23558	0.794416	0.459087	6.43778	0.540746	0.0333478	0.0370772	0.201271	0.20165	6.6334	10.923	7.72495	5.72627	0.0981028	4.04323	0.0168861	0.00853578
sw15-12	2864.35	28.6435	0.629388		4.23525	37	0.0157122	0.00550454	6.98472	0.331169	0.938394	1.29681	0.799157	0.341477	4.61376	0.30462	0.0223645	0.0248418	0.108941	0.211305	7.03012	11.728	8.29214	5.36643	0.0493441	2.47547	0	0
sw15-12	2864.95	28.6495	0.63544		4.05126	37	0.0127928	0.0024841	7.06063	0.235165	0.545561	1.25391	0.49266	0.18013	3.96549	0.251857	0.0323588	0.0119465	0.0449368	0.146751	7.12566	11.795	7.54373	5.88138	0.0363967	1.25771	0	0
sw15-12	2865.56	28.6556	0.641492		4.13222	37	0.00652115	0.00342185	7.22226	0.229709	1.48482	1.23496	0.346258	0.0479315	2.98025	0.0847816	0.0054465	-6.97383e-05	0.106123	0.107034	7.32998	12.8273	8.36772	6.05721	0.0452391	1.7008	0	0
sw15-12	2866.16	28.6616	0.647549		4.2071	37	0.00344189	0.000391808	7.46605	0.0555302	2.49242	1.3058	0.341867	0.0504737	2.68016	0.111598	0	-7.3437e-05	0.0158069	0.199416	7.52147	13.5076	10.2883	6.76317	0.0238192	2.90218	0	0
sw15-12	2866.77	28.6677	0.653599		4.20661	37	0.00811522	0.00155279	7.15518	0.0472329	1.07084	1.34725	0.136925	0.0328067	2.55363	0.0668942	0	0.0254581	0.0637177	0.181899	9.4571	15.3601	10.3038	8.07927	0.0178473	9.54073	0	0
sw15-12	2867.37	28.6737	0.659651		4.09419	37	0.00442562	0.00840774	7.07986	0.0262451	1.19319	1.27904	0.659685	0.0998179	1.71246	0.107753	0.0276888	0.0246046	0.15422	0.184172	8.1331	15.6775	10.4994	8.08551	0.0201237	14.6801	0.0168247	0
sw15-12	2867.98	28.6798	0.665699		4.08166	37	0.00469873	0.0130445	7.09712	0.0305557	0.657625	1.25753	1.10757	0.401411	2.01939	0.276769	0.0109414	0.0243067	0.0303303	0.0992402	9.24447	14.548	10.5302	7.8134	0.0397601	17.4713	0	0
sw15-12	2868.58	28.6858	0.671751		4.46917	37	0.0133423	0.0176371	7.23235	0.0305215	1.33027	1.29677	1.84622	0.468541	2.45251	0.375276	0.0226896	0.0504785	0.142155	0.162926	8.13574	14.4755	11.46	7.69509	0.0176683	19.0146	0	0
sw15-12	2869.19	28.6919	0.677808		4.14733	37	0.0104951	0.0194665	6.44191	0.014536	-0.231124	1.20451	2.30914	0.611019	1.91621	0.345008	0.0221633	0.061652	0.0152707	0.150769	7.91978	13.5846	9.07832	7.14484	0.0115056	14.5565	0	0
sw15-12	2869.79	28.6979	0.68386		4.12728	37	-0.00206942	0.0224299	7.43036	0.0221679	0.979111	1.15142	2.57845	0.319973	1.68982	0.183497	0.00523905	0.0582943	0.0436529	0.20592	6.92208	11.0645	7.73509	5.21309	0.0244778	11.8343	0	0
sw15-12	2870.4	28.704	0.68991		4.05998	37	0.0111345	0.0267898	6.71613	0.0148716	0.538082	1.14139	3.25127	0.58658	1.55638	0.207004	0.0319152	0.0117827	0.0443207	0.136698	6.81888	10.2636	6.96822	4.77897	0.0110454	9.48852	0.0323214	0
sw15-12	2871	28.71	0.695957		4.18888	37	0.00667292	0.0340978	7.15785	0.0257008	1.47048	1.21046	4.47455	0.478709	1.9013	0.482802	0.0377573	0.0359827	0.0449431	0.138617	6.41109	9.32759	5.77382	3.8531	0.0224011	8.53305	0.0163877	0
sw15-12	2871.61	28.7161	0.70201		4.08963	37	0.00661502	0.0411082	6.72783	0.0139936	1.48476	1.25516	6.22501	0.305215	1.43471	0.163832	0.026312	0.0233812	0.0585195	0.119328	6.74607	7.55753	4.64108	2.50969	0.0109275	5.93053	0	0.0161637
sw15-12	2872.22	28.7222	0.708062		4.19657	37	0.00176045	0.043706	6.64078	0.0115165	0.0323598	1.24557	5.67362	0.384992	1.69349	0.404938	0.0438114	0.0365333	0.121975	0.149017	5.64819	4.90956	3.04512	2.21988	0.0255868	5.69512	0	0
sw15-12	2872.82	28.7282	0.714119		3.85544	37	0.0039375	0.0354575	6.09158	0.0144955	0.920788	1.18126	5.59345	0.210009	1.23671	0.230087	0.0591237	-6.30861e-05	0.109737	0.0595835	5.54141	3.85366	1.95341	1.62224	0.00511548	4.69496	0	0

## Sheet: AB08-11
	Time [Sec]	Distance	Distance through grt (mm)		MgO	SiO2	P2O5	K2O	CaO	TiO2	Cr	FeO	Rb	Sr	Zr	Ce	Nd	Sm	Eu	Gd	Dy	Er	Yb	Lu	Hf	Pb	Th	U
AB08-11	1537.48	15.3748	0		2.55052	37	0.00467106	-0.000129045	6.97319	0.0630593	73.787	13.7992	0.0891518	-0.00920258	1.05875	-0.00518356	0.0447143	0.192282	0.198402	5.16319	30.9519	19.4502	12.5576	1.00777	-0.0083126	0.138638	-0.00552962	0.0232262
AB08-11	1538.03	15.3803	0.0055		2.50573	37	0.00242079	1.41016e-05	6.97516	0.0577527	82.5069	14.3219	0.149937	0.0996492	1.06339	-0.00520629	0.0449104	0.193125	0.255262	5.80499	33.2102	19.7653	12.436	1.32495	0.0226083	-0.0282163	-0.00555386	-0.00648266
AB08-11	1538.59	15.3859	0.01101		2.71616	37	0.0128562	8.61969e-05	7.2249	0.05563	94.1031	14.4611	0.211211	0.0271675	1.33713	-0.00522805	0.0450981	0.193932	0.181363	3.7153	32.3231	24.2385	16.0362	1.40897	-0.00838393	0.0277197	-0.00557707	-0.00650975
AB08-11	1539.13	15.3914	0.01651		2.62223	37	0.00768898	-0.000218443	7.09002	0.0596453	73.5993	14.0212	0.262256	0.026208	1.08208	-0.0050434	-0.0151071	0.255978	0.138798	5.38346	28.5924	20.8186	13.5873	1.51065	0.021901	-0.0273335	0.0213573	-0.00627984
AB08-11	1539.68	15.3969	0.02201		2.51393	37	0.0141869	0.00152174	6.70948	0.0605527	65.5349	14.3803	0.0286658	-0.00908996	0.887551	0.0475275	0.222679	0.259872	0.342812	4.00396	29.4912	21.9274	15.271	1.3895	-0.00821087	0.0271475	0.103115	-0.00637538
AB08-11	1540.23	15.4024	0.02751		2.51897	37	0.00225907	-1.05695e-05	7.36039	0.0508197	64.7569	14.3791	0.226603	-0.00995794	1.26122	-0.00560904	0.0483846	0.054821	0.134257	2.78534	29.4294	22.3477	17.2999	1.53271	0.0577094	0.0898786	0.380586	0.0251326
AB08-11	1540.79	15.4079	0.03301		2.50793	37	0.00441098	0.00150505	6.92139	0.04793	72.6906	14.3395	-0.0340847	-0.0100825	1.04297	0.140311	0.312995	0.365827	0.197013	5.5218	30.0543	23.5058	15.7817	1.78646	0.0246619	0.51724	0.806858	-0.0070715
AB08-11	1541.34	15.4134	0.03851		2.10266	37	0.0064262	0.000709666	5.50345	0.0304604	37.3707	12.0116	0.0257077	0.119901	0.843268	0.089838	0.413156	0.421232	0.159291	2.82628	23.953	19.005	14.7861	1.40994	-0.00736359	0.467434	0.701053	0.0205745
AB08-11	1541.88	15.4189	0.04401		2.45928	37	0.00473341	0.000860072	6.44012	0.0404781	62.5261	13.9814	0.151276	0.13716	1.23522	0.129776	0.716811	0.410113	0.295201	3.23311	29.7793	24.9338	15.8447	1.91859	0.116511	0.985272	1.58197	-0.00654052
AB08-11	1542.43	15.4244	0.04951		2.47751	37	-0.000494512	0.00127533	6.35035	0.0354743	36.5212	14.3787	0.148943	0.0629318	1.1629	0.500025	0.765863	0.757032	0.23503	2.93724	28.9304	21.6915	16.039	1.79185	-0.00829369	1.52459	1.39307	0.0231733
AB08-11	1542.98	15.4299	0.05501		2.52229	37	0.00407295	0.00208963	6.30437	0.0309403	34.212	13.9879	0.0901909	0.136931	1.77338	0.776612	1.20316	0.624332	0.313506	3.10298	25.6938	22.2264	14.8391	1.70861	0.147498	2.67037	2.44143	0.173629
AB08-11	1543.54	15.4354	0.06051		2.42839	37	0.00808454	0.0021131	6.60858	0.028295	37.447	13.9047	0.337263	0.175439	1.95719	1.49445	1.83295	0.848661	0.259998	2.75943	24.3014	24.1752	17.8853	1.80741	0.0545593	2.6435	2.5813	0.236306
AB08-11	1544.09	15.4409	0.06601		2.42119	37	0.00781822	0.00367268	5.667	0.0172375	27.024	13.6513	0.207176	0.16966	2.0512	1.02311	2.07055	0.680599	0.380118	2.66853	22.0308	24.9089	20.8652	2.14266	0.052762	3.32673	2.44189	0.111068
AB08-11	1544.63	15.4464	0.07151		2.36365	37	0.00220575	0.00437627	5.6507	0.0196439	21.9906	13.5189	0.221254	0.0666417	1.51355	1.14895	1.82937	0.502406	0.189987	4.15249	27.4124	28.357	22.9331	2.32937	0.0237823	1.67318	1.91071	0.0558981
AB08-11	1545.18	15.4519	0.07701		2.4485	37	0.00640598	0.00435308	6.23802	0.0244466	32.0886	13.9722	0.237914	0.112717	1.99152	0.751032	2.03555	1.02291	0.140959	1.66373	24.5883	31.0133	30.1587	3.44462	0.0956069	1.16776	1.96091	0.127547
AB08-11	1545.74	15.4574	0.08252		2.52793	37	0.00478728	0.00305204	6.08849	0.0203706	23.6448	14.3962	0.106009	0.289863	1.32244	0.944507	0.84112	0.73383	0.302204	2.03454	27.2235	43.3642	45.5918	5.29541	0.136716	0.693537	1.46387	0.133496
AB08-11	1546.29	15.4629	0.08802		2.53618	37	0.0148841	0.00250301	5.92936	0.0184223	14.9085	14.2037	0.250873	0.205444	2.03603	0.791941	1.28042	0.400006	0.104115	3.08367	30.7067	61.6245	68.4089	8.2984	0.211588	0.698725	1.27729	0.063381
AB08-11	1546.84	15.4684	0.09352		2.46036	37	0.00834914	0.00168324	5.86993	0.0174659	31.7819	14.2751	0.252229	0.206555	1.2109	0.411039	0.997108	0.402168	0.261347	2.80334	33.134	72.8128	91.9269	12.1928	0.10136	0.702502	1.2511	0.0637237
AB08-11	1547.39	15.4739	0.09902		2.69656	37	-0.000219812	0.00189561	6.47703	0.0143299	31.1443	15.4661	0.189541	0.171855	0.869662	0.0949293	0.286234	0.423947	0.110347	2.95515	39.6968	103.898	124.352	17.0622	-0.0105543	0.669981	0.725699	0.0294898
AB08-11	1547.94	15.4794	0.10452		2.64309	37	0.00550434	0.000944042	6.19048	0.0188099	34.3779	15.5903	0.459346	0.0743276	0.303722	0.307933	0.0526911	0.310025	0.146207	2.74268	48.4633	120.635	163.72	22.3328	0.0265252	0.359844	0.932585	0.0973202
AB08-11	1548.49	15.4849	0.11002		2.66751	37	0.00436008	0.000609251	6.3167	0.0188693	43.6755	15.266	0.22679	0.224859	0.79961	0.109831	0.374623	0.361606	0.255112	2.78764	53.018	147.325	190.046	24.999	0.0911367	0.150141	0.410661	-0.00698991
AB08-11	1549.04	15.4904	0.11552		2.83639	37	0.0083674	-0.000252616	5.90453	0.0186168	41.9715	15.7735	0.274206	0.10093	0.642466	0.130281	0.10677	0.267641	0.239639	2.49315	62.2346	161.185	205.023	25.7	-0.00845634	0.0844971	0.21802	0.0236278
AB08-11	1549.59	15.4959	0.12102		2.68676	37	0.00757117	-5.30398e-05	5.77124	0.0184621	52.5127	15.3536	0.303462	-0.00847086	0.237248	-0.0047714	-0.0142923	0.111814	0.114208	2.93683	55.0136	142.549	181.759	23.2274	0.0207198	0.0252985	0.0707963	0.0213794
AB08-11	1550.14	15.5014	0.12652		2.87262	37	0.0104439	-0.000389835	6.10261	0.0237604	65.1553	16.0851	0.268463	0.0268282	0.575823	0.101009	0.0445348	0.120984	0.123575	2.31813	61.5552	144.978	182.986	22.8644	0.0531177	0.0827273	0.0218627	-0.00642845
AB08-11	1550.69	15.5069	0.13202		2.81593	37	0.00566461	-0.000177475	6.24138	0.0177976	71.3185	15.4238	0.572829	0.0633662	0.741751	0.0483382	0.10544	-0.02024	0.105978	2.58593	58.8609	137.65	168.11	20.4127	-0.00835093	-0.0282227	0.0220521	-0.00648413
AB08-11	1551.24	15.5124	0.13752		2.88392	37	0.0162999	-0.00030811	6.63648	0.0163146	78.7562	15.8112	0.656257	0.0280443	0.935506	0.0223493	0.109273	0.0527464	0.16787	1.90976	54.3127	121.818	151.648	18.9893	0.0555255	0.0864773	0.137297	-0.00671984
AB08-11	1551.79	15.5179	0.14302		2.65158	37	0.00508657	-0.000957201	6.32843	0.0150688	70.4209	14.8233	0.274565	0.027438	0.316937	0.0218662	0.10691	0.412248	0.0695994	1.99406	47.874	110.556	130.626	16.6102	0.0229288	0.0279957	0.0223596	-0.00657456
AB08-11	1552.34	15.5234	0.14853		2.72749	37	0.0049231	-0.000764323	6.01725	0.0205231	51.3163	15.5099	0.0305868	0.104568	0.778187	0.0226247	0.0471271	0.0533963	0.0328442	2.71296	45.1606	99.2205	112.996	16.2299	0.0562096	-0.029609	0.0520986	-0.00680264
AB08-11	1552.89	15.5289	0.15403		2.74556	37	0.00918975	-0.000164334	6.44446	0.0221918	54.3436	15.9764	0.225144	0.106667	0.56416	-0.00557293	-0.0166932	-0.0216604	0.133393	2.36975	43.1213	81.6099	96.6617	13.42	-0.008937	-0.0302033	-0.00594498	0.0249708
AB08-11	1553.44	15.5344	0.15953		2.7165	37	0.00635774	-6.1422e-05	6.26806	0.0188844	47.9399	15.6509	0.159129	-0.00980956	0.6732	-0.00552546	-0.016551	-0.0214759	0.0530259	1.69245	38.4992	70.5013	82.7667	11.4246	0.0239943	0.0885393	-0.00589434	-0.00688008
AB08-11	1553.99	15.5399	0.16503		2.49071	37	0.01219	0.000359953	6.34084	0.0183336	44.6191	15.3107	0.216715	0.0278756	0.874614	-0.0053643	-0.0160683	0.198986	0.0707093	1.3879	31.06	56.6789	62.1049	9.528	0.0232944	0.0859569	0.0227162	-0.0066794
AB08-11	1554.54	15.5454	0.17053		2.57421	37	0.0104284	-0.00147589	6.21104	0.0203249	48.6422	15.202	0.158193	0.0668401	1.12194	0.107469	0.175057	0.128722	0.111788	1.81314	28.6539	53.2943	56.7775	7.80497	0.0891769	0.794748	0.110623	-0.0068396
AB08-11	1555.09	15.5509	0.17603		2.58065	37	0.0128394	-0.000288715	6.63171	0.0200359	49.6855	15.8457	0.222177	0.028578	1.23658	0.446887	1.13395	0.279126	0.190779	2.86174	28.3564	37.5964	51.1438	7.38014	0.0892828	1.73912	0.227376	0.0561311
AB08-11	1555.64	15.5564	0.18153		2.54297	37	0.0149097	0.000977409	6.49666	0.0275093	36.8988	15.5626	0.222384	0.105359	2.48531	0.673708	2.35049	0.730558	0.112025	2.07885	25.4757	34.2836	45.5793	5.78393	0.154829	2.50799	0.548595	0.276815
AB08-11	1556.19	15.5619	0.18703		2.59791	37	0.00304	0.00341281	6.93241	0.034998	40.7202	16.1131	0.232959	0.11037	3.43576	1.83261	3.19942	1.00161	0.406752	3.00063	24.5118	35.4673	39.1267	5.9723	0.0250405	3.12248	1.00267	0.322997
AB08-11	1556.74	15.5674	0.19253		2.44418	37	0.0067674	0.00440743	6.85134	0.0344946	40.4023	15.5679	0.290148	0.340206	3.78443	2.72026	5.36614	1.35031	0.453597	3.69983	29.2759	32.6541	35.018	5.2654	0.0574083	4.21794	1.4731	0.152798
AB08-11	1557.29	15.5729	0.19803		2.50042	37	-0.00441214	0.00472074	6.96539	0.0355494	35.832	15.4509	0.293664	0.147465	4.99387	3.24681	7.79391	2.90959	0.418604	3.61034	26.7323	28.2428	29.4969	4.41688	0.158845	5.90451	1.52119	0.219323
AB08-11	1557.84	15.5784	0.20353		2.39292	37	-0.00323633	0.00605432	6.36376	0.037333	34.5335	14.864	0.535573	0.407743	4.30827	3.88524	7.44823	1.6889	0.442458	2.70277	25.1894	28.0614	29.5366	3.95019	0.250179	5.28206	1.81232	0.367198
AB08-11	1558.39	15.5839	0.20903		2.07238	37	0.00513868	0.00590787	5.53207	0.0364033	23.201	12.5893	0.629245	0.320962	4.51846	3.27477	6.84892	1.78852	0.367092	4.25598	21.8629	22.5802	22.4283	3.19785	0.0766929	4.53386	0.946633	0.399853
AB08-11	1558.94	15.5894	0.21453		1.79038	37	0.0117214	0.00485371	4.76632	0.025533	12.7236	11.1017	0.476032	0.354365	3.29174	2.53248	4.36299	1.46107	0.305256	2.86947	16.4366	16.9552	20.3991	2.64504	0.173184	3.4569	0.890126	0.2424
AB08-11	1559.49	15.5949	0.22004		1.4952	37	0.000114262	0.0029672	3.89448	0.0220486	11.6567	9.35838	0.160169	0.379932	2.32138	2.2182	3.35162	1.23024	0.251234	1.78016	14.8194	14.7447	15.6597	2.31156	0.111513	2.997	1.32014	0.222074
AB08-11	1560.04	15.6004	0.22554		1.35958	37	0.011088	0.00447283	3.61967	0.0171027	12.7674	8.37502	0.1909	0.147051	2.03609	1.1856	3.27461	0.788124	0.219477	1.73571	14.1097	14.7892	15.4357	1.96814	0.0377713	1.79072	0.871897	0.100532
AB08-11	1560.59	15.6059	0.23104		1.2034	37	0.00926605	0.00827035	3.27875	0.0198511	11.3748	7.58309	0.625375	0.176617	1.51041	0.989018	2.0428	0.389403	0.207262	1.23521	12.4721	11.3694	13.1413	1.57534	0.0142031	2.15684	0.811474	0.108294
AB08-11	1561.14	15.6114	0.23654		1.16453	37	0.000705791	0.00861531	2.91758	0.0167386	15.5	7.23903	0.778272	0.131202	1.44512	0.838728	1.58898	0.613692	0.24279	1.62655	12.787	11.9284	12.0484	1.79905	-0.00525272	2.23022	0.986477	0.108452
AB08-11	1561.69	15.6169	0.24204		1.14694	37	0.0024891	0.00936186	3.17155	0.0142071	7.11967	7.12844	0.538407	0.195397	1.3809	0.903161	1.70364	1.082	0.249035	2.58235	12.462	12.2373	12.2235	1.57363	0.166364	1.59758	0.778114	0.0694097
AB08-11	1562.24	15.6224	0.24754		1.2033	37	0.00404337	0.0085223	3.06722	0.0138393	5.01677	7.54468	1.02416	0.180023	1.05872	0.990948	2.15968	1.30773	0.187357	2.28986	12.6623	11.5518	11.4142	1.57443	0.0343002	1.05426	0.774098	0.0340268
AB08-11	1562.79	15.6279	0.25304		1.34506	37	0.009291	0.01021	3.45732	0.0153984	20.2582	8.41079	1.77654	0.242642	1.01783	0.814426	1.65306	0.582527	0.195119	2.73345	11.9332	12.3827	13.0848	1.72998	-0.00638189	1.38649	0.88186	0.086192
AB08-11	1563.34	15.6334	0.25854		1.48958	37	0.011374	0.0106363	3.90254	0.0177094	14.8803	9.18055	1.07187	0.180697	1.99029	1.3641	2.18841	1.03007	0.22118	3.20583	14.5483	14.3357	12.9184	1.95257	0.0195896	1.76514	0.808319	0.149365
AB08-11	1563.89	15.6389	0.26404		1.47741	37	0.00540745	0.00954885	4.01829	0.021194	10.9415	9.33416	1.15525	0.376842	1.25942	1.08594	1.81089	0.968373	0.268743	2.71119	15.3401	13.7109	12.5049	1.95508	0.0184162	1.88676	0.894799	0.0918516
AB08-11	1564.44	15.6444	0.26954		1.43907	37	0.014066	0.00779371	3.60723	0.0171075	10.1389	8.31782	0.872534	0.403113	1.31751	0.997141	1.95214	0.487366	0.166883	2.60965	13.2276	13.9412	13.0088	1.86526	0.0159465	1.04316	0.502252	0.0585075
AB08-11	1564.99	15.6499	0.27504		1.20202	37	0.00604437	0.00655133	3.09827	0.012319	17.9185	7.30552	0.645681	0.349495	0.650288	0.406029	0.730472	0.553016	0.178925	1.88391	12.6688	10.8208	10.5761	1.33622	0.0895501	1.17749	0.317298	0.0871853
AB08-11	1565.54	15.6554	0.28054		1.0314	37	0.0102659	0.00479274	2.69067	0.0107184	9.13739	6.42577	0.529656	0.284774	0.480186	0.324792	0.603371	0.216279	0.1954	1.44147	11.399	9.0475	9.62525	1.38626	0.0449722	0.668099	0.158587	0.0282735
AB08-11	1566.09	15.6609	0.28605		0.998292	37	0.00510674	0.00503865	2.41074	0.0155675	11.2828	6.05533	0.327095	0.29528	0.715677	0.467508	0.898504	0.430485	0.112599	1.91156	9.64866	9.26096	8.15955	1.1037	0.0756586	1.02367	0.353639	0.0274547
AB08-11	1566.64	15.6664	0.29155		0.935731	37	0.00434701	0.0063015	2.36747	0.0160178	11.96	5.93335	0.644411	0.114212	0.729254	0.510225	0.81988	0.41737	0.0682489	1.89065	10.0124	8.80902	10.2459	1.29306	0.0462905	1.17682	0.450443	0.061755
AB08-11	1567.19	15.6719	0.29705		0.866544	37	0.00188524	0.00595328	2.34064	0.0169089	9.6494	5.96697	0.535128	0.252862	1.30007	0.431471	0.881388	0.494374	0.167208	1.87515	9.58417	8.38519	8.45203	1.26594	0.0585276	1.34366	0.58471	0.0571489
AB08-11	1567.74	15.6774	0.30255		1.18516	37	0.000104461	0.00632122	3.26835	0.0297705	30.7981	7.49299	0.482802	0.195725	1.44978	0.890849	1.63196	0.382019	0.138732	1.62748	14.1498	11.5983	11.3637	1.43953	0.101949	1.14621	0.687895	0.0992567
AB08-11	1568.29	15.6829	0.30805		1.31642	37	0.00867586	0.00476584	3.61966	0.0278201	34.7703	7.93502	0.386368	0.129902	1.28738	0.742987	1.17466	0.574746	0.248815	1.85641	14.795	12.868	14.3097	2.03862	0.133787	1.07328	0.661922	0.0625583
AB08-11	1568.84	15.6884	0.31355		1.55723	37	0.0130984	0.00482468	4.05047	0.0281292	20.9583	9.33662	0.384436	0.177404	2.0909	1.02023	1.22205	0.406294	0.169519	3.35811	19.3613	16.863	15.9149	2.00851	-0.00710245	0.688288	0.770111	0.0198449
AB08-11	1569.39	15.6939	0.31905		1.74619	37	0.0105018	0.00426843	5.08173	0.0401682	33.6588	10.5583	0.311038	0.127701	1.95614	0.74941	1.57675	0.649057	0.152122	2.77751	21.1572	15.163	16.8271	2.39222	0.0503168	0.655151	0.591102	0.0779183
AB08-11	1569.94	15.6994	0.32455		1.94139	37	0.00314806	0.0021283	5.89236	0.0529144	29.1027	11.9422	0.649478	0.139465	2.02629	0.516389	0.915069	0.489965	0.242722	2.1441	22.2198	19.8636	18.2866	2.94356	0.0867103	0.37191	0.277455	0.0239317
AB08-11	1570.49	15.7049	0.33005		2.19751	37	0.00775516	0.000958485	6.1947	0.051144	39.1312	13.4018	0.0953058	0.144696	2.21647	0.307843	0.884995	0.811134	0.231962	3.27895	23.0533	15.6505	17.1852	2.64819	0.0570132	0.564101	0.229108	-0.00689989
AB08-11	1571.04	15.7104	0.33555		2.27981	37	0.00390544	0.000543034	6.61162	0.0600163	32.7232	13.5166	0.0306032	0.028405	2.07378	0.0507398	0.23773	0.426777	0.228815	2.84442	22.411	16.706	18.8079	2.20171	0.0887424	0.49784	0.283957	0.0557914
AB08-11	1571.59	15.7159	0.34105		2.37343	37	0.0109347	0.000492561	7.27286	0.0482842	41.7047	14.5198	0.0990599	0.0700853	2.00711	0.171911	0.384365	0.213651	0.15851	2.31216	24.0482	17.9848	17.2761	2.3091	0.0592589	0.0922919	0.177063	0.0258074
AB08-11	1572.14	15.7214	0.34655		2.40223	37	0.00447483	4.2067e-05	7.68713	0.0606557	26.2312	14.8222	0.232758	-0.0102284	2.71996	0.0534801	-0.0172578	0.449826	0.158558	3.68322	23.0126	15.5084	14.6413	2.2125	0.0250189	0.33941	0.0854855	-0.00717386
AB08-11	1572.69	15.7269	0.35205		2.47585	37	0.0074249	-6.47312e-05	7.37441	0.0560462	20.2515	15.5432	0.167703	0.111456	3.3496	0.0839916	0.0502316	0.375101	0.160258	4.96925	22.9082	14.5817	14.6995	1.87546	0.0599124	0.218179	0.148144	0.026092
AB08-11	1573.24	15.7324	0.35756		2.45699	37	0.00781388	0.00211314	6.69259	0.0615158	16.1327	15.1146	0.303841	0.0711008	1.79541	0.11432	0.0504037	0.136928	0.202699	3.45749	22.2812	13.9862	11.3788	1.6515	0.164349	0.218926	0.27256	-0.0072756
AB08-11	1573.79	15.7379	0.36306		2.37551	37	0.0149939	0.00372888	6.79643	0.0597917	24.3437	14.4549	0.167141	0.111083	1.96266	0.173224	0.252407	0.453125	0.201331	2.74395	17.2279	12.0975	10.2194	1.26992	0.0252024	0.46635	0.301488	0.0592358
AB08-11	1574.34	15.7434	0.36856		2.38898	37	0.0156197	0.00332053	6.97262	0.0561172	15.2495	14.544	0.330295	0.210143	1.68998	0.091617	0.497702	0.322387	0.243117	4.21176	13.4909	8.96192	8.49061	1.09185	0.0653517	0.714707	0.46466	-0.00790904
AB08-11	1574.89	15.7489	0.37406		2.32609	37	0.0225639	0.00372803	6.31829	0.0449306	13.8334	14.286	0.11649	0.885173	2.01139	0.306626	0.13714	0.251245	0.13784	3.6856	16.9388	9.85525	10.2024	1.10071	-0.0108617	0.471629	0.746829	-0.00843359
AB08-11	1575.44	15.7544	0.37956		1.73418	37	0.00507081	0.00833458	5.50697	0.0373289	11.493	11.2218	0.423167	2.10892	1.43921	0.225818	0.179334	0.746824	0.134692	2.66051	13.1392	7.13168	5.61338	0.861677	0.124816	0.633169	0.471313	-0.00700673
AB08-11	1575.99	15.7599	0.38506		1.72431	37	0.0016019	0.0124027	4.81083	0.0369658	10.7481	11.0067	0.299964	2.24234	1.11881	0.61704	0.25088	0.292783	0.200113	2.31573	10.5992	7.50245	4.77518	0.785893	0.127952	0.896473	0.5749	0.0588775
AB08-11	1576.54	15.7654	0.39056		1.51691	37	0.0114517	0.0123871	4.36019	0.0297023	18.0243	9.61695	0.329622	2.41208	1.75267	1.7004	0.647022	0.333847	0.124053	2.69692	11.4765	6.39684	5.78526	0.803346	0.0533232	1.80565	0.7638	0.141925
AB08-11	1577.09	15.7709	0.39606		1.23757	37	0.00797858	0.0106289	3.49863	0.0230483	17.2503	8.21896	0.205091	2.33055	1.09	2.63272	0.30904	0.254058	0.221653	1.39569	8.97142	5.91292	4.20194	0.58174	0.064031	1.54326	0.790346	-0.00491099
AB08-11	1577.64	15.7764	0.40156		0.850641	37	0.00552803	0.010037	2.67709	0.0177363	6.83991	5.67333	0.168613	2.12124	0.951172	2.04241	0.330973	0.170774	0.082465	1.44262	5.55094	3.71129	2.95935	0.351183	0.0272766	0.582554	0.587478	0.0422393
AB08-11	1578.19	15.7819	0.40706		0.659858	37	0.00307548	0.00651643	1.71589	0.0143472	11.295	4.27944	0.146268	1.71186	0.682967	1.62986	0.367294	0.273807	0.0797809	1.14204	4.01771	2.48328	2.21616	0.175161	0.0646867	0.924537	0.387701	0.0761469
AB08-11	1578.74	15.7874	0.41256		0.392884	37	0.00398163	0.00438194	1.11815	0.00539558	6.72148	2.32941	0.131762	0.974264	0.50228	1.45803	0.259467	0.112865	0.0733447	0.578356	1.92485	1.2924	1.03442	0.179486	0.00760868	0.478942	0.369688	0.0279161
AB08-11	1579.29	15.7929	0.41806		0.372071	37	0.00327805	0.00479058	1.02511	0.00677945	5.38402	2.22655	0.0385703	0.918641	0.342538	1.64697	0.227845	0.113823	0.0777965	0.846929	2.22703	1.48094	1.43807	0.200265	0.0230733	0.805362	0.366168	-0.00279239
AB08-11	1579.84	15.7984	0.42357		0.208473	37	0.003594	0.00234914	0.538364	0.00354151	1.86473	1.1077	0.0279749	0.382673	0.198172	0.767887	0.146352	0.149213	0.0622563	0.150022	0.953082	0.58935	0.491349	0.114726	0.00706327	0.165579	0.26558	0.025915
AB08-11	1580.39	15.8039	0.42907		0.100175	37	0.00252822	0.00114763	0.270633	0.00216075	0.955495	0.740609	0.0349187	0.166912	0.160215	0.410272	0.0809141	0.0284135	-0.00140382	0.198349	0.765286	0.359049	0.530764	0.044562	-0.0019444	0.123429	0.120837	0.0123754
AB08-11	1580.94	15.8094	0.43457		0.142993	37	-6.33774e-05	0.00140268	0.298782	0.00156288	3.53564	0.757941	0.0326368	0.419984	0.368039	0.378588	0.192794	-0.00737546	0.0114081	0.129887	0.568484	0.499115	0.734133	0.083987	0.00824034	0.294901	0.168997	0.0302336
AB08-11	1581.49	15.8149	0.44007		0.0836182	37	0.00326757	0.00137629	0.276587	0.001784	2.10615	0.574086	0.0727789	0.114608	0.170521	0.243253	0.0283387	0.0136792	0.0134314	-0.00406933	0.313814	0.321797	0.541467	0.0383056	0.0227221	0.172488	0.0801259	0.00627122
AB08-11	1582.04	15.8204	0.44557		0.0758617	37	0.00273647	0.000508452	0.203717	0.00136675	8.74492	0.525929	0.509801	0.193736	0.167992	0.194571	0.072172	0.0162192	0.0813632	0.0346459	0.272034	0.25337	0.585721	0.0547612	-0.0026612	0.0621761	0.0510155	0.111957
AB08-11	1582.59	15.8259	0.45107		0.0554502	37	0.0026822	0.000445999	0.184835	0.00161477	191.79	0.598875	0.00910653	0.643612	0.0976341	0.148899	0.0896439	0.0158975	0.0214405	0.150023	0.38922	0.373981	0.215513	0.062833	0.0167351	0.322537	0.0500038	0.0166017
AB08-11	1583.14	15.8314	0.45657		0.0504245	37	0.000614772	0.00328887	0.179026	0.00125716	2.84404	0.217659	0.0616665	0.0824254	0.154523	0.0847979	0.0486459	0.0357702	0.00370463	0.0681741	0.319243	0.249898	0.305787	0.0389119	0.088315	0.106288	0.0307406	0.0330597
AB08-11	1583.69	15.8369	0.46207		0.0331647	37	0.0176581	0.000592575	0.153628	0.0023117	0.149029	0.508054	-0.0125499	0.462803	0.103974	0.148419	0.115244	0.0204375	0.00507506	0.0933933	0.468856	0.111606	0.135213	0.0415333	0.0463819	0.706107	0.0864552	0.033316
AB08-11	1584.24	15.8424	0.46757		0.0295869	37	0.000686868	0.00641317	0.154358	0.000550346	4.07856	0.21885	0.0254066	0.110665	0.103888	0.07447	0.0299103	-0.00574153	0.0141763	0.101113	0.0417712	0.209243	0.471291	0.0182515	0.0151986	0.277085	0.0219184	0.0235358
AB08-11	1584.79	15.8479	0.47307		0.0339978	37	-0.00104109	0.0021598	0.10216	0.000325996	3.73378	0.272362	0.0381333	0.197016	0.361498	0.0091819	0.0191258	-0.00861758	0.0133293	-0.00644647	0.0961135	0.0694071	0.180968	0.027394	0.0491792	0.0355279	0.0328978	0.0607161
AB08-11	1585.34	15.8534	0.47857		0.0232918	37	0.00206006	0.000359102	0.180547	0.000566075	-2.11819	0.188902	-0.0107453	0.071715	1.12209	0.0350288	-0.00536293	-0.00695872	0.0107635	-0.00520555	0.158568	0.115313	0.0854079	0.0187607	0.103588	0.00949282	0.0455483	0.0490284
AB08-11	1585.89	15.8589	0.48407		0.0376436	37	0.00397984	0.00108389	0.0627558	0.00117131	0.172007	0.0815203	0.0135122	0.752905	4.14913	0.109261	0.0208192	-0.00938055	0.0231614	-0.00701722	0.213754	0.102183	0.483494	0.0207605	0.110937	0.245688	0.0358104	0.176647
AB08-11	1586.44	15.8644	0.48957		0.0248213	37	0.00515498	0.00243104	0.0664481	0.000293376	3.00262	0.126936	0.0574639	0.0381909	5.63134	0.0390385	-0.00597682	0.0740157	0.0119956	-0.00580142	0.206793	0.084479	0.16286	0.0508655	0.340871	0.160333	0.0824966	0.100341
AB08-11	1586.99	15.8699	0.49508		0.0237182	37	0.00375009	0.00818186	0.0316747	0.00028825	2.89424	0.21008	0.320265	0.155558	13.9336	0.0495815	0.0451611	-0.00550776	0.00343925	-0.00412014	0.253657	0.185087	0.283882	0.0441028	1.06801	0.326577	0.156252	0.403935
AB08-11	1587.54	15.8754	0.50058		0.0257759	37	0.00151621	0.0403523	0.0515053	0.00177668	1.34819	0.0924992	1.05896	0.395951	69.2706	0.0631013	0.0120236	0.0136231	0.0233697	-0.00405263	0.123449	0.212815	0.728346	0.111393	2.96588	0.186725	0.390228	0.916324
AB08-11	1588.09	15.8809	0.50608		0.0276541	37	0.00321737	0.048174	0.0288576	0.00292373	4.81316	0.123226	1.13647	0.373773	122.469	0.0143228	-0.00462189	0.0150807	0.00374486	-0.00448625	0.229684	0.388818	0.806278	0.204393	4.85341	0.289422	0.464702	1.72152
AB08-11	1588.64	15.8864	0.51158		0.0171509	37	0.00125863	0.0391989	0.0390114	0.00165862	3.87081	0.166365	1.03542	0.625039	139.127	0.0139267	0.012942	0.0146636	0.00901965	0.0313232	0.200718	0.378065	0.885751	0.19874	4.56743	0.281418	0.475712	1.588
AB08-11	1589.19	15.8919	0.51708		0.0256006	37	0.00333368	0.0383049	0.0328794	0.00226352	1.88431	0.0954083	0.869666	1.15115	162.696	0.0280993	0.0168049	0.0190404	0.0605977	0.0406725	0.201902	0.297443	0.918867	0.188594	4.48145	0.281865	0.483335	1.87225
AB08-11	1589.74	15.8974	0.52258		0.0171944	37	0.0010914	0.0200964	0.0229936	0.00177486	1.47752	0.0976277	0.522438	0.338085	122.442	0.0377403	-0.00457568	0.035797	0.0256115	-0.00444139	0.181339	0.38493	1.16089	0.268314	7.07847	0.122746	0.427662	2.43973
AB08-11	1590.29	15.9029	0.52808		0.0241668	37	0.00246626	0.0127161	0.0420633	0.00124113	16.9342	0.13428	0.346839	0.121189	275.043	0.03165	0.0139545	0.0158108	0.0155244	0.0337736	0.387097	0.568291	1.42169	0.372187	7.8622	0.355467	0.76172	2.6486
AB08-11	1590.84	15.9084	0.53358		0.00727771	37	-0.000140672	0.0109826	0.0651025	0.000216312	2.21389	0.0667981	0.332496	3.89768	214.89	0.0892938	0.0297883	-0.00571811	0.0141185	-0.00427749	0.218996	0.419426	1.61728	0.244608	5.93249	0.149764	0.575669	2.02083
AB08-11	1591.39	15.9139	0.53908		0.0215304	37	0.00317434	0.01529	0.0719315	0.000586511	7.11613	0.0593978	0.0103856	0.28123	220.496	0.0553676	0.03756	0.0181304	0.00450216	0.0387285	0.108373	0.610728	1.37828	0.34672	6.64097	0.12917	0.725859	2.22919
AB08-11	1591.94	15.9194	0.54458		0.00473259	37	0.0216192	0.00334866	0.0246558	0.000139419	4.14727	0.023194	0.0273081	0.0512034	94.2815	0.0429272	0.0302192	-0.00368548	-0.00109786	0.0423504	0.0982727	0.218017	0.608049	0.122047	2.9544	0.0253608	0.305684	0.884087
AB08-11	1592.49	15.9249	0.55008		0.0186918	37	0.0037842	0.00357627	0.144745	0.000216186	-0.257384	0.124614	0.0686813	0.0290194	199.647	0.05892	0.0482874	-0.00926916	0.00578801	0.0497897	0.139326	0.390433	1.6506	0.257723	6.40847	0.29391	0.616966	1.67704
AB08-11	1593.04	15.9304	0.55558		0.028962	37	0.00431887	0.0151814	0.0333845	0.00179407	18.7271	0.0430429	0.306906	0.664165	179.802	0.0883065	0.0511025	-0.00980954	0.0332682	0.112723	0.109408	0.27395	0.71961	0.272748	5.1751	0.229864	0.599414	1.42783
AB08-11	1593.59	15.9359	0.56109		0.0118638	37	0.00661292	0.0183167	0.018928	0.00187315	1.049	0.0900943	0.608426	0.216945	116.423	0.035215	-0.00731319	0.557485	0.0146777	0.457467	0.216232	0.211127	0.571907	0.208861	3.03078	1.81941	0.592789	0.891792
AB08-11	1594.14	15.9414	0.56659		0.00553971	37	0.00667312	0.0225796	0.112678	0.0807123	3.80324	0.031533	0.295574	0.110225	70.0149	0.0294421	0.159942	0.131486	-0.00236334	0.042616	0.0577196	0.153993	0.547383	0.174621	1.80544	0.951901	0.311645	0.61703
AB08-11	1594.69	15.9469	0.57209		0.0053327	37	0.00185497	0.0182346	1.17317	0.000808864	23.4525	0.0280816	0.145126	1.90868	23.307	0.047989	0.057647	0.0438437	0.0051932	-0.00251159	0.0244265	0.0747003	0.0998051	0.0544444	0.507176	2.45099	0.0815107	0.181934
AB08-11	1595.24	15.9524	0.57759		0.0145452	37	0.00487834	0.0217486	0.274396	0.000871617	2.68215	0.0343188	0.827287	0.631976	31.2318	0.0578016	0.0473708	0.0228661	0.0308388	0.271432	0.207206	0.0990532	0.230632	0.0684222	0.803106	0.213078	0.0843258	0.305196
AB08-11	1595.79	15.9579	0.58309		0.0066486	37	0.00161365	0.00815312	0.0305973	0.000614193	3.9477	0.0145611	0.10985	0.0595154	10.6126	0.0117474	0.0403321	-0.00491882	0.0166817	0.0565229	0.13116	0.0256525	0.0174477	0.0180113	0.246299	16.5043	0.0456146	0.114366
AB08-11	1596.34	15.9634	0.58859		0.00912058	37	0.00377598	0.00843036	0.0318934	0.000692479	6.24067	0.0381708	0.156956	0.285953	8.20787	0.10861	0.0288906	0.0139456	0.023923	0.0297894	0.0618532	0.076155	0.164855	0.0390516	0.235272	0.0381621	0.0514287	0.137113
AB08-11	1596.89	15.9689	0.59409		0.013623	37	0.00359749	0.0046559	0.0623374	0.00113881	0.903269	0.0679314	0.255643	73.3443	8.10161	-0.0021023	0.115863	-0.00817105	0.0051023	0.0438911	0.0911333	0.1586	0.100287	0.0457017	0.121634	0.732438	0.0200479	0.0696075
AB08-11	1597.44	15.9744	0.59959		0.00759104	37	0.00362146	0.0032007	0.005411	0.000617117	1.02061	0.0430566	0.206188	0.442929	4.86723	0.0342623	0.0204907	0.0232165	0.022796	-0.00690651	0.138776	0.0743602	0.032749	0.0605548	0.0809379	0.139938	0.0100592	0.0242449
AB08-11	1597.99	15.9799	0.60509		0.020041	37	0.00278929	0.00378814	0.0514055	0.000208477	0.576014	0.144163	7.35315	0.124187	3.28982	0.0331716	0.0198384	0.0224775	1.10224	0.157416	0.654308	0.0973697	0.382716	0.0413629	0.105711	3747.53	0.0828925	0.0498099
AB08-11	1598.54	15.9854	0.61059		0.0253628	37	0.00287873	0.00639794	0.0756165	0.000195141	2.85365	0.174773	0.0370237	0.911821	1.85921	0.130656	0.0936217	0.0210395	0.398788	0.147346	1.52093	0.23366	0.248715	0.0346768	0.0605483	8.1078	0.0547651	0.0712754
AB08-11	1599.09	15.9909	0.61609		0.0591739	37	0.00433638	0.00101342	0.240675	0.00101813	23.2207	0.374518	0.0787031	0.661995	1.99427	0.264219	-0.00818591	-0.0106217	0.0458192	0.0570549	0.530366	0.537869	0.362088	0.0901808	0.0768662	0.834908	0.0550364	0.012245
AB08-11	1599.64	15.9964	0.62159		0.0788805	37	0.00512067	0.00102701	0.244824	0.00102285	1.45188	0.547505	0.0686754	1.02669	0.757288	0.00987529	0.103709	0.251331	0.074175	0.333379	0.82221	0.811401	0.962987	0.101067	0.0245345	0.396154	0.225012	-0.00296923
AB08-11	1600.19	16.0019	0.6271		0.109694	37	0.00126137	0.000545935	0.359256	0.00197056	38.7744	0.80418	-0.0143596	0.496178	0.587285	0.563452	0.298698	0.186804	0.0572692	0.106861	1.0774	0.761316	0.925636	0.141818	0.067297	0.39748	0.187712	0.0381202
AB08-11	1600.74	16.0074	0.6326		0.247551	37	0.00127155	0.00351187	0.733493	0.00295623	2.48796	1.626	0.0176756	0.10445	0.742418	0.207853	0.0639247	0.117112	0.0755686	0.0659134	2.32578	1.28327	2.07805	0.270083	0.0137098	0.253689	0.147268	0.0141462
AB08-11	1601.29	16.0129	0.6381		0.340142	37	0.00578245	-0.000136438	0.944787	0.00632412	6.99821	2.19153	0.054178	0.126178	0.870567	0.142608	0.063782	-0.0122435	0.0415226	0.215616	2.98577	2.254	3.72998	0.411363	0.03241	0.624641	0.16364	0.0501886
AB08-11	1601.84	16.0184	0.6436		0.646939	37	0.00720497	-0.000229382	1.7975	0.00754012	8.14094	4.3379	0.176518	0.296863	1.16251	0.220267	0.494694	0.162077	0.0106043	1.02654	5.59023	4.09065	4.43269	0.701861	0.174857	0.304246	0.551267	0.11965
AB08-11	1602.39	16.0239	0.6491		0.894008	37	0.00869422	0.00119548	2.23763	0.0101547	15.4211	5.96793	-0.0266127	6.23903	3.19018	0.246336	0.759706	0.346204	0.153824	1.99101	7.27796	5.57083	6.45367	0.887045	0.124721	1.0219	0.888565	0.0452583
AB08-11	1602.94	16.0294	0.6546		1.14917	37	0.00595224	0.00120413	3.51883	0.0208912	18.9176	7.68868	0.329007	0.495735	1.90927	0.420361	1.18689	0.40389	0.197999	1.70755	10.5186	7.81306	8.75806	1.12222	0.0532236	0.97032	1.14632	0.0824197
AB08-11	1603.49	16.0349	0.6601		1.41069	37	0.0112334	0.00668797	3.65476	0.0226678	6.17623	9.16306	0.0301617	0.328472	2.37686	0.354681	1.04822	0.714993	0.264139	2.93153	13.798	9.50454	10.7663	1.55301	0.0233945	0.663943	0.793954	0.116681
AB08-11	1604.04	16.0404	0.6656		1.57913	37	0.0190349	0.00165749	4.44224	0.0218468	20.7523	10.3171	0.406811	0.178973	2.38672	0.662089	1.05257	0.496263	0.0907002	2.42901	14.2637	11.0369	11.9118	1.68138	0.087825	0.608696	0.739889	0.117165
AB08-11	1604.59	16.0459	0.6711		1.69622	37	0.0112586	0.00125682	5.05665	0.025154	15.8752	11.4379	0.218134	0.178633	2.15969	0.716352	0.987823	0.716596	0.187308	2.03912	15.214	12.6859	14.4549	1.97215	0.119764	1.07067	0.967483	0.209692
AB08-11	1605.14	16.0514	0.6766		1.77502	37	0.0125875	0.00218185	4.91365	0.0311178	18.2715	11.9583	0.159526	0.0287846	2.38681	0.564032	0.884654	0.583816	0.11273	2.88243	15.0228	13.6867	14.8292	1.5864	0.122865	1.03901	0.933805	0.151688
AB08-11	1605.69	16.0569	0.6821		1.8731	37	0.013647	0.00070694	5.72321	0.0357719	6.88489	13.0119	-0.0360429	0.0730766	1.72157	0.580631	1.1685	-0.0233416	0.122218	2.12516	19.5486	13.8441	14.345	2.09197	0.0617882	0.997682	1.07608	0.0612956
AB08-11	1606.24	16.0624	0.6876		1.92546	37	0.0196478	0.00139991	6.0203	0.0457811	13.1025	13.8968	0.101436	-0.0104705	1.81221	0.752149	1.4217	0.541039	0.120026	3.069	16.9739	14.2473	16.5892	2.24273	0.130818	0.663616	0.869179	-0.00734367
AB08-11	1606.79	16.0679	0.6931		2.01614	37	0.00119686	0.000807172	6.53512	0.0443688	15.3358	14.2984	0.353265	0.0288638	1.24895	0.365684	0.693431	0.661298	0.132951	3.02247	19.0859	15.9332	16.0954	2.18515	0.0571479	0.982309	0.671351	0.0248881
AB08-11	1607.35	16.0735	0.69861		1.97728	37	0.00931499	6.71903e-05	6.57373	0.0486296	9.51282	13.8226	0.0971547	0.0293544	1.56115	0.342858	1.03346	0.595372	0.216212	1.73025	20.2626	13.7083	17.4228	2.45563	0.0581193	1.12014	1.04213	0.0253111
AB08-11	1607.89	16.079	0.70411		1.99363	37	0.0133571	0.0001997	6.61595	0.042472	7.58423	14.2817	0.164767	-0.0101571	1.69902	0.317835	1.24617	0.602997	0.26	3.52146	22.5934	18.0542	16.4807	2.60529	0.126902	0.705093	0.934153	0.0911535
AB08-11	1608.44	16.0845	0.70961		2.08983	37	0.0068915	0.000381278	6.25827	0.0473137	6.51415	15.0732	0.295468	0.108756	2.03862	0.812282	1.03954	0.598873	0.217483	4.30827	22.2676	16.8009	17.1398	2.84351	0.193607	1.43133	1.40974	0.1556
AB08-11	1608.99	16.09	0.71511		2.09536	37	-0.00540888	0.00177493	5.88824	0.0541083	20.7692	14.3647	0.102712	0.0310335	2.69633	0.884429	1.37019	0.711008	0.249988	3.81785	27.0078	20.0331	22.3722	3.36987	0.132465	1.24824	1.48166	0.163539
AB08-11	1609.55	16.0955	0.72061		2.00648	37	0.0233095	0.00245719	6.90216	0.0567275	2.53238	14.0021	0.374856	-0.0104637	2.72181	0.812265	1.83176	0.621202	0.373493	3.90814	21.4082	20.4879	21.3801	3.69107	0.270918	1.42151	1.18108	0.0601573
AB08-11	1610.1	16.101	0.72611		2.03627	37	0.0128357	0.00133645	6.91219	0.0538203	24.0013	14.2033	0.241485	0.0310616	4.23885	1.19254	1.71877	1.03827	0.335926	3.67914	29.0161	22.6927	24.2191	3.17089	0.168127	2.65932	1.99035	0.266365
AB08-11	1610.64	16.1065	0.73161		2.25389	37	0.009439	0.0041204	7.55679	0.0620363	10.4263	15.5681	0.250126	0.0753377	3.88027	1.10789	2.06808	0.990843	0.41453	4.39983	29.5878	25.7626	30.6557	4.20274	0.137329	2.62171	2.16003	0.0986428
AB08-11	1611.19	16.112	0.73711		2.25646	37	0.00943428	0.00450465	7.31132	0.0619239	20.6772	15.7466	0.585049	0.196702	13.6537	1.00278	1.7787	0.382984	0.355449	2.24537	30.8357	25.1343	28.4296	4.63891	0.838939	1.62519	1.25446	0.264945
AB08-11	1611.74	16.1175	0.74261		2.20678	37	-0.00121967	0.00729433	6.53308	0.0631791	16.2501	14.2778	0.736198	0.375516	16.9097	0.846931	1.58924	0.809019	0.231357	4.58499	26.3295	24.2806	29.9933	3.96979	0.648414	1.86631	1.07823	0.246291
AB08-11	1612.3	16.123	0.74811		2.25082	37	0.00621774	0.00917781	6.6832	0.0646955	23.9758	14.6008	1.15922	0.747016	17.1342	0.905285	1.64359	0.602443	0.157307	3.92608	30.1627	25.8692	27.041	4.96439	0.534641	1.99143	0.569659	0.254715
AB08-11	1612.85	16.1285	0.75361		2.41993	37	0.0133893	0.0122734	7.55167	0.0733751	9.11866	15.622	1.08833	1.1299	15.1024	1.11548	1.60156	0.307555	0.275378	3.58561	28.501	28.4957	36.1766	5.31984	0.422659	2.56595	0.636032	0.131242
AB08-11	1613.39	16.134	0.75911		2.32614	37	0.0121681	0.0112527	6.77841	0.0712948	9.33889	15.616	1.1866	1.37353	10.4132	0.791453	2.07298	0.654087	0.326523	3.22938	30.4072	26.9892	36.3126	5.44832	0.211457	1.89599	0.651393	0.169946
AB08-11	1613.95	16.1395	0.76462		2.28101	37	0.0156407	0.0102125	6.63239	0.0626548	22.1198	14.9666	1.51126	1.23033	8.18108	0.876546	1.90281	0.670362	0.197843	4.21742	30.2041	28.7857	35.1646	5.10593	0.443637	2.69331	0.364127	0.101337
AB08-11	1614.5	16.145	0.77012		2.29722	37	0.0135204	0.0126844	7.213	0.0653363	10.9194	15.1045	1.01414	1.4803	4.8654	1.42699	2.09055	0.683406	0.364404	4.29949	34.3141	27.9127	34.7481	4.92516	0.0281574	2.39811	0.371213	-0.00807379
AB08-11	1615.05	16.1505	0.77562		1.97734	37	0.00482624	0.00984738	6.31526	0.0553709	7.62635	13.5798	1.09999	0.912292	3.13145	0.585798	1.85482	0.527758	0.17895	2.71999	28.7089	24.4473	33.5646	4.17535	0.0591905	1.63424	0.237857	0.0257776
AB08-11	1615.6	16.156	0.78112		1.84308	37	0.00187902	0.00860521	6.00654	0.0540438	8.30335	12.8204	1.18304	0.528774	2.32074	0.618587	1.39424	0.581559	0.191415	3.26501	22.3732	24.3015	26.4779	4.23269	0.220819	1.27163	0.286639	0.0247239
AB08-11	1616.15	16.1615	0.78662		1.74553	37	0.00664118	0.00687409	5.73666	0.0468971	12.5046	11.5015	0.754204	0.353882	1.65407	0.61069	0.892365	0.548959	0.348729	2.09091	21.119	21.5576	27.0279	3.55526	0.084559	0.865282	0.408634	-0.00648542
AB08-11	1616.7	16.167	0.79212		1.52816	37	-0.000166355	0.00505856	5.55897	0.0487851	25.3553	10.7734	0.316787	0.373144	1.42786	0.353532	0.853371	0.388888	0.208501	2.94731	20.4964	17.534	24.747	3.615	0.110481	0.720663	0.285153	0.0223181
AB08-11	1617.25	16.1725	0.79762		1.55988	37	-0.00460143	0.00424685	4.91614	0.0517655	25.8622	10.8649	0.264185	0.309763	1.87511	0.386719	0.634258	0.327261	0.139819	2.28119	19.22	18.0527	19.3779	3.21025	0.0522713	0.462712	0.290854	-0.00632601
AB08-11	1617.8	16.178	0.80312		1.61928	37	0.0180499	0.00321675	5.51463	0.0525177	25.1378	11.6015	0.671393	0.336637	4.19976	0.306725	0.304289	0.28023	0.0529854	1.69116	18.6381	19.3751	24.0571	3.43684	0.253787	0.502854	0.374628	0.0879672
AB08-11	1618.35	16.1835	0.80862		1.71248	37	0.0154088	0.00250259	5.22349	0.0631058	42.2116	12.065	0.163835	0.069224	6.8479	0.199046	0.710209	0.755011	0.197349	2.68967	24.0965	19.6489	24.9814	3.85101	0.0585307	0.579115	0.47648	0.0906379
AB08-11	1618.9	16.189	0.81412		1.703	37	0.0154051	0.00266804	6.33684	0.0685161	42.1507	12.0728	0.302704	-0.0103347	8.08731	0.203678	0.456127	0.295457	0.243677	3.02918	25.0082	20.9424	23.3889	4.08275	0.267576	0.779833	0.209818	-0.00724837
AB08-11	1619.45	16.1945	0.81962		1.71573	37	0.0261985	0.00193802	6.56603	0.053811	41.6538	13.1076	0.174298	0.0736449	5.91357	0.242873	0.544559	0.720554	0.16656	2.28564	22.8048	21.6396	29.7616	4.51755	0.134243	0.68099	0.346483	0.0271182
AB08-11	1620	16.2	0.82512		1.7736	37	0.0131462	0.000692537	6.6306	0.0575417	66.2799	13.5415	0.105292	0.0318129	4.46752	0.182726	0.55084	0.227092	0.146535	3.91374	25.4688	23.039	31.1442	4.51221	0.172194	0.360652	0.285569	-0.00762285
AB08-11	1620.55	16.2055	0.83062		1.93476	37	0.0108399	-4.10311e-05	6.57071	0.0641866	49.2845	14.0577	0.182432	-0.011246	4.23112	0.123936	0.275498	0.581111	0.151624	4.20033	26.3533	24.4689	34.269	4.54991	0.178174	0.237341	0.161156	0.137197
AB08-11	1621.1	16.211	0.83613		1.93484	37	0.0207848	0.0013923	7.11898	0.073039	35.7823	14.7088	-0.0381574	0.0330383	3.46065	0.0590161	-0.0190442	0.148989	0.106597	3.45961	26.5456	25.8227	28.458	4.81726	-0.0101957	0.23821	0.0943346	0.0284876
AB08-11	1621.65	16.2165	0.84163		1.83465	37	0.0145353	0.00184229	7.11534	0.0742032	30.2683	14.5864	0.481009	0.0778329	2.42666	0.2238	0.129512	0.76153	0.198962	2.87203	25.6452	22.7997	30.3683	4.73843	-0.0102575	0.308235	0.230547	0.10191
AB08-11	1622.2	16.222	0.84713		1.87435	37	0.00896375	0.00830546	6.80792	0.0757475	32.6045	15.2077	0.927453	-0.011371	2.36395	0.25703	0.427429	0.500072	0.130348	3.9423	25.3901	25.8729	33.8882	4.61247	-0.0102713	0.171305	0.264813	-0.00797519
AB08-11	1622.75	16.2275	0.85263		2.04196	37	0.00814527	0.0246801	6.57238	0.0726009	23.3561	15.6189	1.67362	0.362651	2.4095	0.304034	0.448176	0.15738	0.232975	3.33496	27.8381	24.7544	34.0513	4.82374	0.188897	1.11569	0.420081	0.0685461
AB08-11	1623.3	16.233	0.85813		2.00385	37	0.0114068	0.0432539	7.06096	0.0690508	2.86406	15.4488	2.35712	0.17406	3.14697	0.610213	0.367375	-0.0259085	0.135659	4.89567	28.9393	26.927	36.6277	5.3387	0.0685832	0.821517	0.169584	0.0680365
AB08-11	1623.85	16.2385	0.86363		1.98856	37	0.00703474	0.0491197	6.8739	0.0680845	22.4908	14.7205	3.56213	0.619738	1.52077	0.29277	0.356415	0.416576	0.154794	5.36488	26.9043	28.4107	37.7305	5.4224	0.181899	0.658331	0.370233	0.0660066
AB08-11	1624.4	16.244	0.86913		1.97241	37	-0.00227098	0.0559862	6.77737	0.07708	16.9773	15.0232	2.93755	1.31876	3.30996	0.196407	0.209712	0.333986	0.181097	2.79814	28.5679	26.4362	35.9345	5.51743	-0.0105526	0.599316	0.620921	0.0294849
AB08-11	1624.95	16.2495	0.87463		2.04121	37	0.00767943	0.0568771	7.03288	0.0717738	18.4271	15.5186	2.82456	1.89592	2.87583	0.302146	0.522956	0.247574	0.183677	2.52052	24.9472	27.5501	38.3729	5.74647	0.148038	0.536296	0.346707	-0.00831036
AB08-11	1625.5	16.255	0.88013		1.96459	37	0.00655235	0.0545424	7.22956	0.0792885	10.2353	15.6616	2.72072	2.78618	3.07091	0.412825	0.532948	0.531043	0.309099	2.73046	30.8623	24.3944	33.1011	5.70296	0.0699797	0.619468	0.0288029	0.0304764
AB08-11	1626.05	16.2605	0.88563		2.02179	37	0.00938432	0.0522554	7.54898	0.0699188	20.6325	15.7958	2.23721	2.38484	2.30084	0.209453	0.876073	0.739615	0.29375	2.31636	26.7593	26.1758	33.7931	5.05355	0.0304733	0.262926	0.401744	0.0314433
AB08-11	1626.6	16.266	0.89113		1.97977	37	0.00785053	0.0438284	7.31459	0.072215	26.1734	14.9678	1.3837	1.98573	2.58847	0.203644	1.24824	0.439495	0.261145	4.36179	30.2376	27.7114	33.3199	5.42596	0.110767	0.694551	0.535286	0.0696381
AB08-11	1627.15	16.2715	0.89663		1.9762	37	0.0208353	0.0313414	7.4309	0.0686317	19.48	15.5951	0.959382	2.11305	3.12788	0.334005	0.981132	0.245768	0.134835	2.9749	22.3656	23.9087	33.0302	5.31873	0.146959	1.24275	1.11692	0.0296869
AB08-11	1627.7	16.277	0.90214		2.04741	37	0.0126606	0.0227303	7.64701	0.0656042	14.0866	16.0275	1.07872	1.33414	2.97188	0.383156	0.86104	0.726924	0.263985	3.26089	28.2774	26.0318	35.5549	5.66632	0.235004	1.21974	0.906752	0.0703955
AB08-11	1628.25	16.2825	0.90764		1.93823	37	0.023442	0.0187307	6.95826	0.068551	14.5435	15.4554	1.32764	0.992468	2.61847	0.43099	1.57806	0.868822	0.180162	2.31658	25.8521	23.479	34.7476	5.51352	0.184131	1.29811	0.964771	0.0668167
AB08-11	1628.8	16.288	0.91314		1.92468	37	0.0100866	0.014083	6.98376	0.0668149	31.1376	14.7184	1.16956	0.415594	3.07679	0.402707	1.61668	0.477574	0.190267	5.07434	23.6937	25.8583	43.5822	5.97903	0.172048	0.950594	1.12846	0.0624319
AB08-11	1629.35	16.2935	0.91864		2.02557	37	0.017468	0.0112459	7.05428	0.0515991	16.6579	14.577	1.08361	0.49405	2.22679	0.459249	1.03368	0.718311	0.447211	3.13955	24.2807	29.1723	44.8323	7.51842	0.0620748	0.161366	0.921143	0.06158
AB08-11	1629.9	16.299	0.92414		2.02646	37	0.0130365	0.0122015	7.58512	0.0619405	19.5025	15.0636	1.34047	0.468374	2.56516	0.443756	0.925841	1.51301	0.373775	2.36113	24.5956	33.6166	50.281	9.07159	0.175853	1.10568	1.08712	0.0638126
AB08-11	1630.45	16.3045	0.92964		2.0086	37	0.0173132	0.0140689	6.98511	0.0619043	17.2518	14.2406	1.04975	0.250285	2.04869	0.571996	1.14315	0.573207	0.283959	4.44043	25.7123	31.8009	61.9309	9.32474	0.17575	0.904054	1.38462	-0.00778029
AB08-11	1631	16.31	0.93514		1.78443	37	0.0147882	0.0129084	6.28805	0.0607575	29.8574	12.7989	1.32559	0.194047	2.16477	0.446459	0.800402	0.538061	0.245522	2.7731	25.994	35.492	58.5326	10.065	0.164974	0.72285	1.14425	0.0262809
AB08-11	1631.55	16.3155	0.94064		1.46286	37	0.0120622	0.0113614	5.45653	0.0524736	30.2436	11.0079	1.27929	0.0938856	1.91147	0.575123	0.726382	0.85202	0.222914	2.20247	22.8493	28.7602	49.6179	8.16835	0.167135	1.07785	0.982939	0.106238
AB08-11	1632.1	16.321	0.94614		1.24868	37	0.0016944	0.0112792	4.46402	0.0435796	26.693	9.29899	0.950806	0.197846	1.68275	0.471638	0.67189	0.270997	0.22135	2.28926	16.6137	25.411	41.4116	7.30634	0.0683001	0.38316	0.620006	0.0429395
AB08-11	1632.65	16.3265	0.95164		0.994509	37	0.0039471	0.0100635	3.63747	0.0351285	23.0228	7.42095	1.07263	0.0441536	1.26447	0.332168	0.368658	0.184168	0.151892	1.71557	13.6726	19.5904	31.5867	5.33318	0.102061	0.213762	0.669414	-0.00451814
AB08-11	1633.2	16.332	0.95714		0.75761	37	0.0101132	0.00712954	2.80317	0.0264365	12.6624	5.65469	1.92027	0.0823444	1.45628	0.158976	0.540286	0.203134	0.0980916	1.41596	10.5978	15.1083	24.2367	3.81711	0.0136941	0.523888	0.213973	0.01413
AB08-11	1633.75	16.3375	0.96264		0.589209	37	0.00414456	0.00584764	2.24005	0.0224892	5.28296	4.62168	0.180332	0.113574	0.871233	0.157517	0.22217	0.260109	0.108525	0.868483	8.63084	9.73066	16.6392	2.69161	0.0291724	0.288638	0.493024	-0.00353052
AB08-11	1634.3	16.343	0.96814		0.508349	37	0.000409316	0.0181367	1.97312	0.0162097	10.2454	3.96651	0.448696	0.069739	0.600534	0.107178	0.20927	0.0990707	0.0352046	0.691005	5.75305	7.66121	13.4057	2.10392	0.0115978	0.558231	0.28033	1.60269
AB08-11	1634.85	16.3485	0.97365		0.365121	37	0.0106325	0.0032858	1.27309	0.0132107	7.05178	2.81837	0.170002	0.0432691	0.345294	0.125587	0.229679	-0.00878649	0.0216946	0.853744	4.52854	5.73568	8.43045	1.41572	-0.00362527	0.448272	0.33316	0.0230735
AB08-11	1635.4	16.354	0.97915		0.314583	37	0.00480052	0.00138582	1.03279	0.00828392	7.94503	2.67025	0.138177	0.102171	0.734714	0.0871856	0.220732	0.110269	0.0442144	0.510436	3.76239	4.38457	7.43849	1.22594	0.0223529	0.640455	0.492951	0.0221747
AB08-11	1635.95	16.3595	0.98465		0.305234	37	0.00267134	0.00439163	1.01879	0.00976856	6.41001	2.20118	0.228452	0.416717	0.522033	0.415443	0.127952	0.0861202	0.197056	0.821561	4.09086	4.53169	8.81542	1.44517	0.065301	0.684397	0.477539	0.0369896
AB08-11	1636.5	16.365	0.99015		0.289856	37	0.00232417	0.00260062	0.98978	0.00713124	3.76353	2.36162	0.269057	0.320312	0.97441	0.496454	0.463442	0.212892	0.0483485	0.6187	4.04631	5.32572	8.73265	1.41288	0.0327929	0.660421	0.694005	0.0668797
AB08-11	1637.05	16.3705	0.99565		0.487588	37	0.00612713	0.00519449	1.68439	0.0134115	11.4786	3.87039	0.471357	0.196609	1.64481	0.712631	0.63264	0.45586	0.0722263	0.928709	6.9594	8.28182	17.4511	2.30896	0.120633	1.11132	0.943446	0.0868955
AB08-11	1637.6	16.376	1.00115		0.668085	37	0.0110901	0.00950521	2.17472	0.0200209	11.8806	5.35408	0.484384	0.0160937	3.31324	0.984261	0.710571	0.537949	0.0519256	1.31694	9.24004	11.7918	18.7528	3.13782	0.160772	1.27823	1.24469	0.155743
AB08-11	1638.15	16.3815	1.00665		0.875302	37	0.00674926	0.00793914	3.05961	0.0335199	15.4223	6.87177	0.489752	0.147275	2.75887	1.03618	0.843581	0.487969	0.18027	1.82581	11.6906	14.6085	24.0738	4.19488	0.169004	1.12329	1.14631	0.121738
AB08-11	1638.7	16.387	1.01215		1.00448	37	-0.000873888	0.00807554	3.83193	0.0307394	21.5778	8.22065	0.665296	0.158621	3.54256	0.688261	0.81653	0.525564	0.0663949	2.06066	13.0097	17.0907	27.0043	4.26509	0.134931	1.59196	1.63351	0.0404185
AB08-11	1639.25	16.3925	1.01765		1.24316	37	0.0137949	0.00859101	5.27371	0.0490438	28.0203	9.95534	0.894184	0.199424	3.22286	0.686126	1.20015	0.388712	0.065626	1.16971	16.2061	19.6164	30.9913	4.60462	0.0808275	1.25414	1.34106	0.10783
AB08-11	1639.8	16.398	1.02315		1.37133	37	0.01098	0.00872147	5.06505	0.0525048	33.6644	10.7549	0.727361	0.197891	3.31745	0.455303	0.677228	0.630429	0.164615	2.11667	16.9444	19.4703	30.9376	5.50967	0.203809	1.25023	1.19863	0.0610509
AB08-11	1640.35	16.4035	1.02865		1.44458	37	0.0187804	0.0091369	5.61967	0.0574881	27.2238	12.301	0.45135	0.0863546	3.27723	0.576674	0.47359	0.554078	0.246186	3.35528	19.4605	23.0219	35.6212	5.77705	0.3684	0.49416	1.08349	0.194337
AB08-11	1640.9	16.409	1.03415		1.43705	37	0.00105593	0.00629892	6.23802	0.0554248	4.19494	12.0253	0.198424	0.0838387	3.11077	0.559873	1.10037	1.00853	0.189615	3.91303	21.8034	23.7972	40.6662	6.72179	0.152825	0.849123	1.34413	0.0703227
AB08-11	1641.45	16.4145	1.03966		1.49816	37	0.0174034	0.00273061	6.5634	0.0580861	26.8681	12.9812	0.3907	0.117579	4.35632	0.404435	1.33805	0.479624	0.345235	3.7811	23.9815	24.4075	44.187	6.8818	0.136259	1.15227	1.55667	-0.00764909
AB08-11	1642	16.42	1.04516		1.55447	37	0.0106539	0.00158945	7.17181	0.0676381	15.4846	13.1868	0.27386	0.0273676	4.33156	0.373806	0.779899	0.483133	0.163819	1.61315	20.6391	24.8244	37.8823	6.57278	0.0855014	0.705525	1.19496	0.144221
AB08-11	1642.55	16.4255	1.05066		1.59185	37	0.00894445	0.00196321	6.90516	0.0616406	21.1554	12.5615	0.496293	0.0613718	3.52467	0.43577	0.571035	0.324883	0.0845619	2.38458	20.4502	23.4945	39.5337	6.20921	0.171851	1.00011	0.475909	0.0514778
AB08-11	1643.1	16.431	1.05616		1.56417	37	0.00903432	0.000796157	6.24508	0.0579879	15.1265	11.6641	0.0942273	0.0284699	2.36072	0.360694	0.620297	0.727114	0.0918569	1.5478	19.5695	20.0733	35.6861	5.19055	0.0237911	0.440236	0.923594	-0.00682181
AB08-11	1643.65	16.4365	1.06166		1.56252	37	0.0164879	0.00102015	5.83489	0.0627795	22.7843	12.1974	0.613079	0.119251	2.62045	0.282058	0.270966	0.486443	0.305474	2.64933	20.7502	25.5122	38.9956	6.19542	0.101149	0.567442	0.819109	0.099266
AB08-11	1644.2	16.442	1.06716		1.70904	37	0.00930799	0.000803102	6.65738	0.0591065	22.327	12.8557	0.246654	0.201989	2.37916	0.339175	1.18793	0.143074	0.146137	2.45094	25.2156	26.619	42.6713	6.1742	0.0628158	1.07974	1.06161	0.0972737
AB08-11	1644.75	16.4475	1.07266		1.78624	37	0.0144405	0.00327967	6.39017	0.0580635	13.1005	13.9769	0.28375	0.0663995	2.35127	0.66785	0.808063	0.202415	0.365349	2.19056	24.3478	28.2539	42.6798	5.90783	0.0236959	1.55009	1.58555	0.0869396
AB08-11	1645.3	16.453	1.07816		1.92645	37	0.00266691	0.00481135	6.7032	0.061255	18.4994	13.1984	0.321734	0.0968243	2.64878	0.515101	0.866698	0.74048	0.175488	2.39173	23.03	24.7952	37.0743	6.05666	0.0219674	1.49125	1.41625	0.109563
AB08-11	1645.85	16.4585	1.08366		2.02134	37	0.0127722	0.00405466	6.58698	0.0479368	20.8552	13.4582	0.209831	0.0632009	3.04114	0.502163	0.708776	0.689319	0.291892	3.69102	25.37	26.0321	39.477	5.97454	0.053438	0.807165	1.28861	0.0232724
AB08-11	1646.4	16.464	1.08916		2.13246	37	0.0201924	0.00350835	6.908	0.0474655	11.7115	14.1034	0.396429	0.137653	2.38012	0.482577	0.841915	0.411586	0.296261	2.61779	24.0788	26.7132	46.2472	6.68804	0.242313	0.875768	1.05637	0.0236207
AB08-11	1646.95	16.4695	1.09466		2.20055	37	0.0146227	0.00304137	6.49104	0.0388357	13.2658	14.4706	0.736018	0.0287136	2.09631	0.420599	0.625608	0.28045	0.310533	2.08676	24.8223	27.6336	49.5086	6.71955	0.0897065	0.799468	0.84362	0.0880363
AB08-11	1647.5	16.475	1.10016		2.10363	37	0.0144742	0.00339763	6.36498	0.0471515	14.8111	14.0279	0.0321403	0.109879	1.70482	0.377948	0.716686	0.369792	0.13741	2.98729	23.6232	28.773	47.8266	7.33718	0.0249292	0.953701	0.693865	0.0585936
AB08-11	1648.05	16.4805	1.10566		1.96357	37	0.00948177	0.00136636	6.11292	0.0330049	14.2956	12.5791	0.352406	0.0674241	1.75965	0.250845	0.434165	0.886764	0.192218	3.4105	23.47	27.6487	40.5147	7.14432	0.0570088	0.801693	0.845968	0.0565544
AB08-11	1648.6	16.486	1.11117		2.14696	37	0.00424332	0.00310477	6.59574	0.0373856	23.8475	14.6473	0.515519	-0.0105439	1.27425	0.391007	0.741449	0.301438	0.206029	3.65556	26.5905	28.8477	47.0579	7.30045	0.09642	0.540911	0.686354	0.0946248
AB08-11	1649.15	16.4915	1.11667		2.07713	37	0.00332789	0.0065409	6.00134	0.0352231	20.6476	14.1645	0.162604	0.108068	1.44406	0.371719	0.508023	0.286569	0.317308	2.53517	20.5931	31.4194	47.8063	7.32232	-0.00905438	0.574764	1.31102	0.0576279
AB08-11	1649.7	16.497	1.12217		1.93181	37	-0.00217509	0.00820451	5.53886	0.0312048	25.2687	13.1545	0.649332	0.176662	1.75079	0.351553	0.604577	0.489855	0.166098	3.41371	20.2011	29.0061	42.9444	6.70431	0.118442	0.486331	0.58879	0.0239263
AB08-11	1650.25	16.5025	1.12767		1.70003	37	0.00984331	0.00792173	5.41893	0.0316017	18.3589	11.4394	0.726946	0.20109	0.766804	0.201463	0.335023	0.254803	0.0481777	2.9706	22.0976	24.829	43.5304	7.14275	-0.00805073	0.457227	0.500325	-0.00625103
AB08-11	1650.8	16.508	1.13317		1.3195	37	0.00537681	0.00877464	4.4127	0.0289246	21.4661	10.4774	0.463865	0.19831	1.1654	0.212584	0.330418	0.502051	0.116052	1.79313	17.0983	22.3935	35.275	5.42122	0.0183119	0.519697	0.532038	0.0671857
AB08-11	1651.35	16.5135	1.13867		1.44974	37	0.0104631	0.00771264	4.92795	0.0330174	24.4202	9.96835	0.441002	0.36699	0.823048	0.156808	0.455333	0.227467	0.171537	2.54531	14.25	22.8091	35.2821	5.49214	0.0461104	0.312071	0.37537	-0.0055804
AB08-11	1651.9	16.519	1.14417		1.40511	37	0.00620568	0.00947594	4.78085	0.0320115	22.1589	9.3885	0.365998	0.194949	1.09436	0.120244	0.155107	0.0475682	0.116495	2.18532	15.7692	20.7358	37.4057	6.05572	-0.00780488	0.234535	0.356036	0.0496752
AB08-11	1652.45	16.5245	1.14967		1.4161	37	0.00577812	0.00737762	4.96493	0.0376359	31.7991	9.21499	0.461071	0.286835	0.920781	0.131235	0.0458208	0.414725	0.146185	2.00604	16.8895	22.2203	39.9222	6.25994	0.0862364	0.312925	0.219617	0.0238009
AB08-11	1653	16.53	1.15517		1.25933	37	0.00505993	0.00567686	4.62117	0.0401013	22.5466	9.01773	0.422259	0.185769	1.37828	-0.00561511	0.113693	0.131585	0.0538862	2.52125	17.8538	21.3173	35.6207	6.68069	0.0577718	0.0899758	0.142851	0.0573113
AB08-11	1653.55	16.5355	1.16067		1.3593	37	0.0106958	0.00482461	5.42118	0.0565694	27.2066	10.0186	0.186798	-0.0115152	0.923895	0.026861	0.357472	0.0633942	0.0622459	2.141	21.2112	31.5775	51.3929	9.32598	-0.0104016	0.173478	0.199399	0.103342
AB08-11	1654.1	16.541	1.16617		1.42566	37	0.00448371	0.00232719	5.41748	0.0589852	43.1913	10.5646	0.107933	-0.0111412	0.76459	0.090517	0.199998	0.232789	0.105218	1.32514	23.6465	32.4244	63.1599	10.2498	0.064567	0.50427	0.226193	0.0281191
AB08-11	1654.65	16.5465	1.17167		1.53945	37	0.00492	0.00263384	5.51397	0.0577726	30.9055	11.512	0.304967	0.0304762	1.43956	0.235352	0.459537	0.297665	0.224475	3.19132	25.7264	42.3638	73.583	12.1814	0.0952131	0.53414	0.429029	0.0262784
AB08-11	1655.2	16.552	1.17718		1.41975	37	0.010154	0.00193077	5.79526	0.0650305	40.8513	11.1782	0.493919	0.131068	1.54232	0.330461	0.334968	0.323329	0.174126	1.89562	28.7599	40.0339	71.8562	12.38	0.0814896	0.349518	0.500243	-0.00625001
AB08-11	1655.75	16.5575	1.18268		1.61329	37	0.0126645	0.00149287	6.11239	0.072737	42.6803	11.8833	0.436	0.0611214	1.6469	0.201572	0.39358	0.323557	0.156243	2.49432	27.3395	37.8391	70.8813	12.0675	0.0516797	0.188198	0.527225	-0.00625442
AB08-11	1656.3	16.563	1.18818		1.62589	37	0.0136824	0.00227445	6.62345	0.0745781	29.0987	12.6277	0.1489	0.0268672	1.48214	0.446716	0.765639	0.262416	0.253496	2.44448	30.4049	41.1797	67.5076	11.5265	0.083938	0.193716	0.624913	0.0823752
AB08-11	1656.85	16.5685	1.19368		1.72738	37	0.0155191	0.00156149	7.0519	0.0867997	38.5481	13.8117	0.421193	0.107203	2.0095	0.311152	0.829415	0.360786	0.113985	2.91454	30.1475	38.29	70.0819	10.9698	-0.00898191	0.149801	0.70666	-0.00697405
AB08-11	1657.4	16.574	1.19918		1.85159	37	0.00891023	0.0015397	7.14202	0.0775085	33.6158	14.3627	0.422273	0.107478	2.0725	0.369689	0.635766	0.285004	0.174667	2.38777	24.208	33.0478	63.6738	10.016	0.091163	0.451214	0.559626	-0.00699193
AB08-11	1657.95	16.5795	1.20468		1.72667	37	0.0132496	0.00235535	6.90927	0.0697444	17.2435	13.454	0.543949	0.0287256	2.43887	0.392354	0.625869	0.658132	0.350295	2.61356	22.9972	31.5555	49.8105	8.43638	0.122613	0.562727	0.638831	0.0247689
AB08-11	1658.5	16.585	1.21018		1.78111	37	0.00675863	0.000394146	7.01865	0.0810778	21.4805	14.694	0.441718	0.235282	2.28896	0.447111	0.391988	0.458607	0.140597	3.05657	25.6778	28.4661	43.7469	7.28653	0.0604342	0.91284	0.460836	0.0599524
AB08-11	1659.05	16.5905	1.21568		1.69655	37	0.00330927	0.00138451	7.25438	0.0676691	17.5138	13.1567	0.747868	0.224894	1.72518	0.398505	0.70093	0.284965	0.396041	2.38745	24.3749	23.3007	39.0504	6.21586	0.0243811	0.691944	0.380959	0.0251572
AB08-11	1659.6	16.596	1.22118		1.5785	37	0.00631945	0.00421165	6.16858	0.0692704	15.3196	11.9099	0.633598	0.208708	1.65469	0.530552	0.28716	0.264455	0.19943	2.9592	19.0041	18.745	34.9118	4.64278	0.0536083	0.586277	0.436409	0.0233466
AB08-11	1660.15	16.6015	1.22668		1.0642	37	0.00958723	0.00522631	4.52144	0.0428601	15.4811	8.68031	0.389358	0.0183934	1.23346	0.287625	0.318481	0.179651	0.0720341	1.67349	13.764	13.4377	20.7715	2.90132	0.0364174	0.132618	0.258933	0.036127
AB08-11	1660.7	16.607	1.23218		1.57756	37	0.0145372	0.00797229	6.02474	0.0569223	4.65549	12.5481	0.417786	0.226351	1.42935	0.267389	0.321202	0.441541	0.0806988	2.16116	14.07	17.422	27.8365	3.98139	0.10676	0.799604	0.301067	0.0215665
AB08-11	1661.25	16.6125	1.23768		1.50063	37	0.00966035	0.00766763	6.07379	0.0529731	16.6077	11.199	0.636096	0.191283	1.31975	0.191637	0.429679	0.177142	0.097185	1.91705	17.0575	18.2349	27.6182	4.40769	0.0775279	0.281324	0.0708558	0.0213974
AB08-11	1661.8	16.618	1.24319		1.5197	37	0.00172022	0.0136365	5.97111	0.0665879	22.9991	11.3187	0.262678	0.272778	1.65626	0.254659	0.454521	0.187383	0.0484775	2.02788	20.6347	22.862	35.5628	6.09555	0.142084	0.0267837	0.342756	0.0515588
AB08-11	1662.35	16.6235	1.24869		1.34645	37	0.00910066	0.00486835	5.92119	0.0721236	28.6969	10.9383	0.582912	0.0583303	2.01615	0.0691418	0.208479	0.112334	0.131924	1.69632	17.0495	24.7675	43.1942	7.23473	0.0493198	0.282396	0.376084	0.0489266
AB08-11	1662.9	16.629	1.25419		1.44538	37	0.0134104	0.00250923	6.0551	0.0627928	38.509	11.4758	0.55743	0.0616628	1.87031	0.0991451	0.161497	0.326423	0.193959	2.03429	22.0763	29.9361	54.0159	9.02933	0.0521375	0.29853	0.424435	0.022706
AB08-11	1663.45	16.6345	1.25969		1.42212	37	0.0145588	0.00151337	7.02988	0.0769792	39.9291	12.8105	0.0903695	0.210467	2.10167	0.129815	0.167453	0.338461	0.144604	2.85917	26.1406	35.0493	61.7249	10.38	0.0853034	0.0278592	0.523655	0.113801
AB08-11	1664	16.64	1.26519		1.52434	37	0.00934586	0.000523535	6.97337	0.0813727	60.8417	11.7667	0.335168	0.0641261	2.16219	0.1302	0.474173	0.483442	0.220599	1.73952	25.4229	38.5333	70.0636	10.9359	0.0855559	0.140947	0.581082	0.053788
AB08-11	1664.55	16.6455	1.27069		1.4587	37	0.011585	0.00145451	6.98054	0.0805601	70.0195	11.9892	0.217955	0.103261	1.65771	0.0778157	0.171934	0.126426	0.0711137	2.16576	27.3289	40.9997	77.4161	12.1492	0.151745	0.375667	0.480466	0.0859556
AB08-11	1665.1	16.651	1.27619		1.42533	37	0.00978243	0.00021049	7.11035	0.081082	72.0296	13.1542	0.338933	0.213462	2.24138	0.350849	0.417567	0.343277	0.146661	2.13933	31.258	38.554	78.828	13.3844	0.0865171	0.256806	0.58761	0.0543923
AB08-11	1665.65	16.6565	1.28169		1.54645	37	0.0153509	0.000656199	7.60138	0.0997277	73.2071	13.9833	0.167058	0.0705856	2.26047	0.173138	0.387108	0.373658	0.138846	2.19069	27.8963	49.2821	92.2203	15.0383	0.0596819	0.341728	1.0394	-0.00722287
AB08-11	1666.2	16.662	1.28719		1.47264	37	0.00509298	0.000598053	6.7339	0.0932814	72.4043	12.8163	0.152255	0.32234	2.33248	0.212157	0.537128	0.196109	0.259207	2.12232	28.9353	45.3831	80.5404	13.7057	0.0858293	0.254764	0.498856	0.0236885
AB08-11	1666.75	16.6675	1.29269		1.52576	37	0.00993283	0.00405017	7.31885	0.105697	96.1587	16.5772	0.234501	0.1111	2.02275	0.292621	0.522277	0.611779	0.201362	1.77793	32.5575	49.5071	90.0085	16.1404	0.0597208	0.590891	0.978529	0.0592448
AB08-11	1667.3	16.673	1.29819		1.75591	37	0.0164403	0.0236081	7.68957	0.10567	94.0443	14.5317	0.0998068	0.35382	2.38094	0.292547	0.319822	0.215262	0.159705	2.74367	30.535	50.5223	94.1338	15.754	0.128718	0.528522	0.855224	0.026002
AB08-11	1667.85	16.6785	1.30369		1.4877	37	0.0140654	0.0493042	6.36023	0.0915279	65.326	12.7547	0.200576	0.164254	2.08814	0.122661	0.38902	0.455451	0.154433	1.99307	27.8474	42.8943	80.3665	13.3288	-0.00796177	0.771563	0.994889	0.0506738
AB08-11	1668.4	16.684	1.30919		1.69432	37	0.00749949	0.0842657	7.23561	0.106873	73.7893	13.6882	0.877108	0.146436	3.16807	0.253881	0.309072	0.284634	0.114129	2.78483	29.5086	45.9689	88.2021	14.6757	0.0910449	0.570884	1.06432	0.153571
AB08-11	1668.95	16.6895	1.3147		1.73269	37	0.00851829	0.0911395	7.77275	0.133326	96.566	13.1798	0.290543	0.106943	2.06219	0.252947	0.372868	0.283587	0.133739	2.1101	28.8938	46.8509	84.074	13.4443	0.157156	0.508877	0.793813	0.153006
AB08-11	1669.5	16.695	1.3202		1.79633	37	0.00402477	0.0831337	6.8963	0.0949385	83.216	13.9831	0.685009	0.0685469	1.96305	0.399831	0.310461	0.362865	0.195418	2.2614	25.7304	43.1838	77.5761	13.6606	0.191942	0.633848	1.09897	0.0252409
AB08-11	1670.05	16.7005	1.3257		1.71246	37	0.0083091	0.0733202	6.96363	0.0893294	74.9288	14.8042	0.515352	0.113639	2.49712	0.360357	0.396213	0.706863	0.0995445	2.10099	30.5238	42.8214	81.9645	13.6718	0.0963889	0.668051	0.812036	0.0266029
AB08-11	1670.6	16.706	1.3312		1.6198	37	0.0147049	0.0480997	7.00097	0.0857745	62.098	13.3038	0.438589	0.192954	2.39291	0.264033	0.253651	0.296016	0.223231	2.20259	24.1756	40.0652	74.465	11.8396	0.0946855	0.468649	0.704927	0.126318
AB08-11	1671.15	16.7115	1.3367		1.65914	37	0.00547965	0.0558188	7.34401	0.104201	51.6691	14.119	0.175125	0.0315992	2.36962	0.212762	0.54714	0.391701	0.145551	3.01965	25.7569	41.302	73.8123	10.8122	0.0987217	0.488625	0.380363	-0.00757166
AB08-11	1671.7	16.717	1.3422		1.68311	37	0.00571655	0.0251912	7.4522	0.0850565	44.7975	14.1152	0.771414	0.121421	1.8839	0.0915008	0.202172	0.148661	0.197326	2.99931	28.5935	40.4221	70.9639	11.4943	0.10299	0.101652	0.531333	0.0647485
AB08-11	1672.25	16.7225	1.3477		1.49044	37	-0.00604487	0.0156186	7.29056	0.0854987	39.6248	15.0619	0.542086	0.119534	2.691	0.0579707	0.561924	0.316973	0.104708	2.35852	26.6411	37.1001	65.8269	10.6347	0.0642544	-0.0338467	0.423749	-0.00777624
AB08-11	1672.8	16.728	1.3532		1.47347	37	0.0118341	0.0090601	7.26531	0.0839279	36.199	13.7904	0.179517	1.07539	1.72268	0.0899086	0.0537703	0.231224	0.0598195	2.79886	26.8727	34.7561	56.6972	10.2513	-0.00999614	0.367214	0.0924886	-0.00776155
AB08-11	1673.35	16.7335	1.3587		1.52654	37	0.00300391	0.00724592	7.87343	0.0906339	29.4136	14.0188	0.260996	2.42118	1.38609	0.292469	0.205888	0.0631417	0.0851571	2.43979	24.5376	30.8087	59.3108	9.03385	-0.0103601	0.242053	0.506849	0.0289472
AB08-11	1673.9	16.739	1.3642		1.32014	37	0.00594407	0.00711943	6.42284	0.0726236	33.6209	12.8589	0.177698	3.4309	1.83236	0.057275	0.268349	0.481745	0.14769	3.35754	21.2948	28.2655	56.5423	8.01358	0.0634832	0.561961	0.222396	0.0629771
AB08-11	1674.45	16.7445	1.3697		1.2937	37	-0.000206488	0.0092142	6.62813	0.0654378	17.0698	12.5863	0.39321	3.86877	1.07171	0.0573892	0.340735	0.229338	0.147984	2.33486	22.0836	26.9554	52.6636	7.86689	0.100372	0.761944	0.321169	0.0985032
AB08-11	1675	16.75	1.3752		1.23265	37	0.00460215	0.00954119	6.27649	0.0684049	26.9776	11.8121	0.170645	4.57576	1.33234	0.115929	0.257698	-0.0230301	0.141828	2.37867	18.1258	23.8046	41.614	7.11661	-0.00950213	0.158477	0.213569	0.0265498
AB08-11	1675.56	16.7556	1.38071		1.11457	37	0.0130762	0.00974218	7.06209	0.0595976	20.4822	10.6142	-0.0336148	5.65367	1.02859	0.080786	0.178497	0.0547415	0.174219	1.84878	15.9506	20.6448	38.5748	5.79041	-0.00898187	0.269903	0.0831042	0.0571664
AB08-11	1676.11	16.7611	1.38621		1.16927	37	0.00508612	0.00803904	5.65053	0.0505172	6.05276	11.0194	0.0295588	4.85048	0.75203	0.157584	0.106901	0.0516015	0.107446	1.86831	13.7617	19.344	34.5687	6.08318	0.0229268	0.367635	0.218286	0.0236566
AB08-11	1676.65	16.7666	1.39171		1.16028	37	0.0110644	0.00626815	6.82491	0.0689239	31.756	11.7993	0.0326287	3.89111	1.61064	0.0241351	0.118004	0.295799	-0.00674766	1.78511	15.5423	21.2888	44.0979	7.87578	0.025308	0.405818	0.0864733	-0.00725676
AB08-11	1677.2	16.7721	1.39721		1.19388	37	0.0220568	0.00484118	6.13707	0.0663732	17.6753	11.8219	0.0974547	3.30873	1.21573	0.0234656	-0.0169729	0.0553808	0.115316	2.00514	20.8376	25.1431	48.5547	8.73295	-0.00908677	0.455314	0.144154	-0.00705547
AB08-11	1677.76	16.7776	1.40271		1.38931	37	0.0124259	0.00564415	6.75419	0.0709124	34.5707	12.9714	0.390667	2.55901	1.76086	0.214919	-0.0183994	0.143945	0.0589477	2.02756	19.9021	33.7745	68.9211	11.4184	-0.00985045	0.230145	0.123705	-0.00764843
AB08-11	1678.31	16.7831	1.40821		1.29508	37	0.0169947	0.011772	7.19385	0.0687294	38.9161	12.6874	1.10159	1.61405	0.557719	0.183068	0.409312	0.227518	0.14681	2.02457	24.9619	36.0298	75.1809	14.0661	-0.00983592	-0.0332413	0.318621	0.0274824
AB08-11	1678.86	16.7886	1.41371		1.34598	37	0.0180688	0.0198752	8.24677	0.0864951	55.2652	14.2669	2.64119	1.42476	2.30338	0.154188	0.198892	0.231501	0.0822636	1.76313	24.5514	39.559	86.5812	14.9464	0.175537	0.233829	0.324199	0.135167
AB08-11	1679.4	16.7941	1.41921		1.50542	37	0.0159715	0.024549	6.51436	0.104188	43.6555	14.3744	1.89917	0.549328	2.15431	0.438786	0.62809	0.651567	0.236619	2.18765	27.9578	43.4252	92.2864	16.2943	0.063605	1.22586	0.812753	-0.00769764
AB08-11	1679.95	16.7996	1.42471		1.58974	37	0.000545584	0.0290153	6.86411	0.0854265	44.4672	14.6654	2.46672	0.992109	2.08837	0.363736	0.957099	0.631626	0.143444	2.8334	28.0063	47.2672	90.1754	16.3594	0.132927	1.2526	0.851421	0.0268524
AB08-11	1680.51	16.8051	1.43021		1.55899	37	0.00558472	0.0277727	6.44884	0.0846019	57.5694	14.1277	2.99143	1.52556	2.13964	0.530689	0.925852	0.135852	0.0971975	3.29244	27.0046	44.3769	81.9058	13.8838	0.232	0.6523	0.762157	0.0591698
AB08-11	1681.06	16.8106	1.43571		1.62892	37	0.0119495	0.0240601	6.90231	0.0775836	68.177	14.8606	2.08435	0.541545	2.37492	0.777233	1.11498	0.226071	0.167724	2.73648	22.4121	46.3828	86.6235	14.2174	0.0989423	1.40453	0.672	0.0971002
AB08-11	1681.61	16.8161	1.44121		1.66621	37	0.00797337	0.0207525	6.4108	0.0796041	54.5354	14.1026	2.01461	0.824018	3.3359	0.638708	1.04232	0.600475	0.0750987	2.55815	24.3898	42.2888	77.8769	13.1516	0.0247405	1.25191	0.839634	0.025528
AB08-11	1682.15	16.8216	1.44671		1.77405	37	0.00782197	0.0182648	6.19686	0.0825137	52.4984	15.0825	1.13349	0.730439	2.63862	3.09836	1.15244	0.207325	0.274032	1.84488	25.7825	37.6529	78.2048	13.2172	0.223673	0.988437	0.853321	0.057046
AB08-11	1682.71	16.8271	1.45222		1.26501	37	0.00612329	0.0119589	5.47966	0.0546709	43.83	10.808	0.716154	0.406875	1.21827	0.560412	0.997354	0.357502	0.142429	2.81835	19.257	33.3291	72.7177	11.6984	0.0743376	0.858876	0.699088	0.0729535
AB08-11	1683.26	16.8326	1.45772		1.66425	37	0.0110738	0.0107108	7.04459	0.0864424	50.6078	15.1022	0.776962	0.477641	1.91247	0.414008	0.592621	0.455412	0.0977969	2.7578	29.0191	45.1668	97.2991	16.1755	0.0600132	1.15664	0.921473	0.0261359
AB08-11	1683.81	16.8381	1.46322		1.46841	37	0.00883216	0.00665322	6.99788	0.0887767	72.2404	14.3011	0.483142	0.455789	2.34104	2.22682	0.630196	0.434577	0.25295	2.36685	27.6915	48.7668	98.9114	16.3154	0.123461	0.805331	0.525214	-0.00693067
AB08-11	1684.36	16.8436	1.46872		1.58528	37	0.0075475	0.00765688	7.0232	0.100859	66.1708	14.2849	0.620838	0.344116	2.43192	0.545673	0.966962	0.13226	0.074395	2.13145	30.549	53.4467	110.001	19.0299	0.0916276	0.393001	0.921529	0.0252888
AB08-11	1684.91	16.8491	1.47422		1.45923	37	0.00814432	0.00781589	7.08662	0.100198	77.3057	14.3304	0.612899	0.495096	2.22862	0.223593	0.695587	0.358905	0.113391	2.76682	33.4385	55.7856	127.487	20.7069	0.0241953	0.746408	0.614362	0.0249655
AB08-11	1685.46	16.8546	1.47972		1.55095	37	0.02016	0.00999202	8.88514	0.115664	81.5571	14.7803	0.563781	0.349329	1.76048	0.347746	0.182593	0.21253	0.137139	2.02747	34.5576	61.8688	137.737	23.4951	0.127084	0.521814	0.905117	0.025672
AB08-11	1686.01	16.8601	1.48522		1.53543	37	0.00812117	0.0087927	7.85125	0.103055	89.0429	14.4731	0.288906	0.454954	1.82163	0.165829	0.370768	0.206093	0.172819	2.75896	31.9174	62.0874	125.514	22.0402	0.0901988	0.625148	0.406434	0.0248945
AB08-11	1686.56	16.8656	1.49072		1.40347	37	0.0113044	0.00595859	7.07676	0.112493	66.518	13.9021	0.355405	0.496552	1.88976	0.224251	0.307975	0.436296	0.0536272	2.64204	27.8861	58.4247	132.053	22.1785	0.0242664	0.389116	0.823544	-0.00695809
AB08-11	1687.11	16.8711	1.49622		1.20172	37	0.0141	0.00679836	6.50654	0.0853818	78.7657	12.209	0.57263	0.426274	1.92131	0.235666	1.01287	0.12199	0.161925	1.84213	26.3699	53.4461	113.077	21.0824	0.14642	0.474112	0.29802	0.0233252
AB08-11	1687.66	16.8766	1.50172		1.2223	37	0.0139984	0.00223789	6.63408	0.0851028	54.1398	11.9838	0.2243	0.299806	2.39233	0.279891	0.241463	-0.0215792	0.11299	1.9647	30.4709	57.4942	128.645	21.732	0.0241097	0.565186	0.759358	-0.00691316
AB08-11	1688.21	16.8821	1.50722		1.30747	37	-0.0053144	0.00744652	7.28013	0.0972325	87.7311	14.3714	0.168985	0.725936	2.40744	0.144968	0.118807	0.217659	0.140448	2.21596	29.1034	59.6583	129.158	22.6137	0.165041	0.471494	0.6781	0.0598892
AB08-11	1688.76	16.8876	1.51272		1.25236	37	0.0146081	0.00458285	5.95992	0.0729202	73.8629	11.2058	0.843519	0.366434	1.4905	0.133247	0.234558	0.20006	0.148426	1.90851	26.0992	55.3126	122.944	20.6634	0.0875583	0.722498	0.680457	0.0550469
AB08-11	1689.31	16.8931	1.51823		1.15457	37	0.015182	0.00644378	6.78344	0.0699866	69.3851	11.0763	0.386039	0.134045	2.52928	0.126828	0.0442822	0.470924	0.122874	1.81658	28.6387	51.7385	113.871	20.0742	0.388584	0.357457	0.75654	0.0230017
AB08-11	1689.86	16.8986	1.52373		1.08323	37	0.00251257	0.0067659	5.39058	0.0670266	57.6176	9.14056	0.122767	0.28963	7.46017	0.127235	0.185395	0.0998958	0.132598	2.11685	21.1435	39.4247	90.0558	14.7185	0.195944	0.159718	0.40224	0.0679178
AB08-11	1690.41	16.9041	1.52923		0.823001	37	0.0110481	0.0021762	4.90328	0.0588662	43.8835	8.73634	0.392359	0.131916	9.60901	0.180511	0.0343955	0.0934397	0.0525589	2.26456	18.6941	33.2579	76.6277	11.7628	0.254408	0.3204	0.27055	0.0406973
AB08-11	1690.96	16.9096	1.53473		0.799418	37	0.0140366	0.00245276	4.01359	0.0480794	37.4701	7.07282	0.299988	0.243224	7.26932	0.078048	0.266214	0.0389889	0.081184	1.41165	14.4896	30.0511	64.7098	10.6345	0.159644	0.106693	0.164932	-0.00496715
AB08-11	1691.51	16.9151	1.54023		0.603884	37	0.00382671	0.00148277	3.83597	0.043393	24.2117	6.14335	0.550208	0.140912	4.05342	0.0688274	0.152996	0.0824386	0.084204	1.32855	11.8754	22.2989	51.4381	7.58464	0.140784	0.0563703	0.182747	0.0157627
AB08-11	1692.06	16.9206	1.54573		0.453352	37	0.00570702	0.00189116	2.13859	0.0215291	19.2438	3.96538	0.323178	0.162042	2.56943	0.106652	0.0846985	0.0985852	0.0255048	0.750833	8.0498	14.7894	32.3506	5.40016	0.011541	4.14701	0.0676128	0.0119083
AB08-11	1692.61	16.9261	1.55123		0.440599	37	0.00873652	0.0011424	2.19763	0.0218406	15.9512	3.8713	0.0816232	0.48896	1.77629	0.0700226	0.0573865	0.0277007	0.0373591	0.59847	8.75538	12.7016	31.608	5.05537	0.130276	0.197354	0.11718	0.0126993
AB08-11	1693.16	16.9316	1.55673		0.37049	37	0.00130762	0.000861655	1.71234	0.0165927	19.3551	3.56825	0.178859	0.191072	1.06692	0.0694799	0.0896244	0.142735	0.0673136	0.660721	6.82121	12.8207	26.6787	4.62494	0.0289342	0.0450631	0.265362	0.0126009
AB08-11	1693.71	16.9371	1.56223		0.245399	37	0.00445413	0.0118324	0.935111	0.00840356	11.0232	2.21236	0.066435	0.134658	0.573052	0.023719	0.0332964	0.0160723	0.0157812	0.581921	4.18695	7.75125	14.9296	2.44786	0.00714101	0.0439818	0.0941435	-0.0020476
AB08-11	1694.26	16.9426	1.56773		0.397713	37	0.00729257	0.00847922	1.45812	0.0158256	19.0574	3.26894	0.197923	0.068725	0.591802	0.0108995	0.083878	0.133583	0.0346927	0.618358	6.02643	10.6898	22.8213	3.4776	0.027079	0.296144	0.150676	-0.00327717
AB08-11	1694.81	16.9481	1.57323		0.25854	37	0.00448221	0.00176716	1.24654	0.00818308	35.7511	1.91258	0.179357	0.123841	0.729061	0.0450323	0.100454	0.0178146	0.0174919	0.60165	3.67875	6.11429	12.3677	2.04875	0.0295913	0.107378	0.133338	0.0394771
AB08-11	1695.36	16.9536	1.57873		0.293632	37	0.00479218	0.00225702	1.23336	0.0100082	7.18608	3.21881	0.0703883	0.217179	0.952428	0.0478187	0.106296	0.12405	0.00593186	0.632361	5.15428	8.52289	16.2105	2.33855	0.0251465	0.065369	0.15288	0.0109514
AB08-11	1695.91	16.9591	1.58423		0.192918	37	0.00860633	0.00135292	0.782282	0.00584196	10.4204	2.57747	0.0352065	0.338881	0.818779	-0.00204702	0.0414475	0.0759331	0.00496813	0.188803	3.20555	4.89981	11.5954	1.55485	0.130608	0.142539	0.138895	-0.00254886
AB08-11	1696.46	16.9646	1.58974		0.192261	37	-0.000383555	0.00156633	0.880765	0.00936584	7.55056	2.65173	0.0416308	0.383842	0.444526	0.0598024	0.0490105	0.0897888	0.0145519	0.0505353	3.24286	4.51079	7.50671	1.32947	0.039297	0.142596	0.0872447	0.0108458
AB08-11	1697.01	16.9701	1.59524		0.1289	37	0.00601524	0.00179416	0.600346	0.00417107	6.10859	0.965653	0.0116319	0.213585	1.88001	-0.00207763	0.0420673	0.10545	-0.00240549	0.0433761	1.40528	2.81674	5.38554	0.946096	0.0584376	0.434257	0.0748849	0.0449981
AB08-11	1697.56	16.9756	1.60074		0.043244	37	0.00191814	0.00731509	0.207196	0.00667681	-0.120976	0.37841	-0.0067274	0.169937	0.4599	0.0276937	0.0617767	0.0109555	0.0187936	0.0767248	0.690598	1.04943	2.04981	0.350496	0.0181979	0.210253	0.0404018	0.00502254
AB08-11	1698.11	16.9811	1.60624		0.0502762	37	0.00307696	0.00116876	0.495435	0.00197899	0.676127	0.42178	0.160802	0.14513	0.181059	0.0388547	0.00957931	0.0260234	0.00269518	0.0231845	0.399632	0.561663	2.52057	0.201309	0.0114255	0.0892331	0.0105898	0.0113344
AB08-11	1698.66	16.9866	1.61174		0.11751	37	0.00730595	0.00174101	0.172954	0.00210394	7.69306	0.400671	0.0112276	0.919354	0.285651	0.0495462	0.0172991	0.0196003	0.0336233	0.137267	0.510103	0.505344	1.86446	0.307085	0.0564065	0.333157	0.242388	0.00898573
AB08-11	1699.21	16.9921	1.61724		0.0201198	37	0.00308065	0.00283978	0.235647	0.00102283	3.54916	0.294258	-0.0126488	0.892709	1.34258	0.507158	-0.00631298	-0.00819146	-0.00244013	-0.00612771	0.536082	0.8334	1.60166	0.295038	0.247256	0.350125	0.0312711	-0.00262424
AB08-11	1699.76	16.9976	1.62274		0.0375782	37	0.0015525	0.00664306	0.0738617	0.00108279	34.1881	0.318864	0.0343785	0.372718	9.78591	0.0082778	0.0172426	-0.00776905	0.0550104	0.184362	0.387927	0.128741	1.0106	0.155993	0.365247	0.589247	0.00846462	0.031847
AB08-11	1700.31	17.0031	1.62824		0.0229786	37	0.00620018	0.0100509	0.16515	0.00128079	7.83138	0.212542	-0.0128526	0.384384	15.1268	0.0529085	-0.00641469	0.0501843	0.0205513	0.0447097	0.383331	0.539638	2.02731	0.231428	0.391311	0.218001	0.043128	0.0954297
AB08-11	1700.86	17.0086	1.63374		0.0341898	37	0.000646926	0.00175423	0.183909	0.00244408	2.25331	0.281797	0.12114	0.5156	11.9101	0.00964754	0.0471697	0.022769	0.00565403	-0.00677339	0.522343	1.71835	2.52145	0.496636	0.384128	0.312084	0.0345661	0.0637951
AB08-11	1701.41	17.0141	1.63924		0.0554201	37	0.00513599	0.0282626	0.256028	0.00266362	17.0188	0.53939	0.10257	2.84619	7.40106	0.271574	0.0514067	0.0248142	0.0698719	0.053006	1.94687	2.76945	6.32285	1.00834	0.25257	0.285674	0.0511308	0.0840629
AB08-11	1701.96	17.0196	1.64474		0.107602	37	0.00525211	0.000785046	1.0944	0.00754791	15.0739	1.20259	0.159599	0.251329	7.87107	0.0600493	0.062145	0.281559	0.0404569	0.210083	3.18671	5.0081	11.4458	2.12381	0.323579	0.378256	0.0780828	0.0313264
AB08-11	1702.51	17.0251	1.65024		0.141622	37	0.0116217	0.010895	1.07223	0.0075327	14.2826	1.79456	0.0482557	0.484047	3.6089	0.0260442	-0.00840433	-0.0109051	0.0470418	0.325517	4.22452	7.27348	17.7988	2.87429	0.112284	0.0750413	-0.00299305	0.0928985
AB08-11	1703.06	17.0306	1.65575		0.445979	37	0.0144106	0.00279149	1.83764	0.0292415	25.5987	3.63566	0.024679	0.514619	3.30758	0.0182547	0.0380245	0.103298	0.0739063	0.82595	9.22951	18.7319	40.1691	5.98999	0.0977742	0.0233719	0.0186667	0.0954709
AB08-11	1703.61	17.0361	1.66125		0.728756	37	0.00661047	0.0105365	4.04666	0.0404614	37.512	5.82854	0.0305147	0.294317	2.96673	0.274767	0.047016	0.0532704	0.13046	0.632345	15.8506	28.402	57.6343	9.51694	0.153303	-0.0295392	-0.00581425	0.0244217
AB08-11	1704.16	17.0416	1.66675		0.825683	37	0.0329363	0.0221959	4.76462	0.0651267	64.2882	7.11626	0.100465	0.0710795	1.55416	0.0241904	0.0503885	0.296477	0.181698	1.09452	18.4852	37.8665	77.5607	12.3744	0.0600996	1.03305	0.0557041	-0.00727341
AB08-11	1704.71	17.0471	1.67225		1.04361	37	0.00989007	0.00320105	5.35769	0.0835685	73.075	11.0781	0.613314	2.72697	4.741	0.0258115	0.0537652	0.0609174	0.0821573	1.46436	25.3661	42.9542	94.3164	15.7362	0.0270659	0.033047	-0.0066489	-0.00776082
AB08-11	1705.26	17.0526	1.67775		1.01958	37	0.0248739	0.000995884	6.06087	0.0870098	59.8119	10.5913	0.170384	0.113238	2.67117	-0.00591626	-0.0177216	0.138642	0.0991936	2.65647	21.1325	48.1032	99.998	16.3174	-0.00948758	0.0948014	0.275972	-0.00736668
AB08-11	1705.81	17.0581	1.68325		1.1829	37	0.0195252	0.000673845	5.98522	0.0835975	53.8691	11.5435	0.17881	0.551709	2.09968	0.0257123	0.125715	0.145499	0.0818416	2.19712	27.1422	48.2151	103.146	18.1409	0.0638805	0.16606	0.0921245	-0.007731
AB08-11	1706.36	17.0636	1.68875		1.24873	37	0.0263905	0.0021701	7.11271	0.0961804	69.4705	11.8574	0.239382	1.10487	1.08817	-0.00592535	-0.0177489	0.219798	0.120587	1.53306	29.7476	48.5701	110.341	19.4879	0.0257308	0.476129	0.0879181	0.0265499
AB08-11	1706.91	17.0691	1.69425		1.18882	37	0.00898711	0.00388212	6.07321	0.0899952	74.7595	11.6038	0.0903269	2.55411	1.39733	0.0217493	0.0453037	0.194816	0.106882	1.35882	23.3546	44.0963	93.1497	15.4141	0.0228063	0.422012	0.0222402	0.0235323
AB08-11	1707.46	17.0746	1.69974		1.09948	37	0.0101466	0.00636542	6.60955	0.0876521	55.2024	11.0428	0.260821	3.41878	1.59287	0.0723464	-0.0150244	0.186058	0.102077	1.53634	20.3376	37.4522	76.7536	13.9566	0.0516057	0.349263	-0.00535065	-0.00624546
AB08-11	1708.01	17.0801	1.70525		1.06996	37	0.012387	0.00608218	5.75834	0.0906032	47.6167	11.0414	0.088884	5.03652	1.16205	-0.00516799	0.04458	0.0505103	0.123701	1.33711	20.0184	37.9027	74.8618	12.4158	0.0531716	0.803141	0.0218849	-0.00643497
AB08-11	1708.56	17.0856	1.71075		0.971395	37	0.0147267	0.00861615	5.71887	0.0794206	40.5568	10.2107	0.0272984	5.43208	0.895446	0.0452605	0.0420604	0.114262	0.116709	0.913617	15.8717	31.3923	68.2253	11.1729	0.0211736	0.653192	0.020648	-0.00607128
AB08-11	1709.11	17.0911	1.71625		0.883194	37	0.0189626	0.0084917	4.99987	0.0670423	39.4926	9.08038	0.0260215	6.37759	0.997206	-0.00464783	0.040093	0.108918	0.0446036	1.53418	14.9184	29.1013	61.2396	10.2044	-0.00745348	1.0213	0.241445	-0.00578729
AB08-11	1709.66	17.0966	1.72175		0.974916	37	0.000136397	0.0107652	5.22993	0.0594446	36.8212	9.44684	0.191198	8.44238	0.820387	-0.00473267	0.0408249	0.175556	0.130247	1.11191	16.0474	28.4293	61.1496	9.85661	-0.00758953	0.93846	-0.00504863	-0.00589293
AB08-11	1710.21	17.1021	1.72726		0.903667	37	0.011812	0.00941861	5.35211	0.0616899	39.9538	9.6149	0.249777	8.03208	0.684197	-0.00480341	-0.0143882	0.046947	0.166632	0.785784	17.012	26.9954	59.531	9.57935	0.0208588	0.643481	0.0458061	-0.00598101
AB08-11	1710.76	17.1076	1.73276		1.0394	37	0.00134935	0.0104696	5.06692	0.0574658	29.9597	10.2364	0.139939	6.32839	1.04254	1.86903	0.0419156	-0.018886	0.0814692	1.83507	15.817	29.9947	66.2549	11.1893	0.0211007	0.963532	0.0205769	0.0217724
AB08-11	1711.31	17.1131	1.73826		0.960189	37	0.0117914	0.00852868	5.72941	0.0648649	38.3808	10.6081	0.262632	5.94364	1.13566	0.0728488	0.0435676	0.0493632	0.0303635	1.78727	18.6495	34.0252	78.1465	14.3482	0.112027	0.73075	-0.0053878	-0.00628883
AB08-11	1711.86	17.1186	1.74376		0.984971	37	0.00659788	0.00580066	6.28083	0.0732457	43.2992	11.3082	0.0304566	5.03575	1.05508	0.0784652	-0.016295	0.276107	0.11071	2.05445	23.7812	44.4117	98.0602	17.5639	0.0236232	0.612108	0.340277	0.0555241
AB08-11	1712.41	17.1241	1.74926		1.125	37	0.00050561	0.00505188	7.07401	0.0816788	51.1712	12.243	0.417647	4.32755	1.30601	0.279979	0.43517	0.130148	0.152844	1.70112	23.6917	46.7536	121.775	21.4562	-0.00890628	0.565363	0.936255	0.120286
AB08-11	1712.96	17.1296	1.75476		1.12989	37	0.00762408	0.00760312	6.71814	0.0851324	84.22	12.9885	0.230325	3.28933	2.1042	0.521899	0.314206	0.445124	0.0342745	2.9667	29.3964	60.4277	136.862	24.7868	0.0586574	0.824875	1.4447	0.0908341
AB08-11	1713.51	17.1351	1.76026		1.1353	37	0.00371677	0.00130147	7.16049	0.0954848	95.5118	12.8442	0.428928	2.0577	3.22218	1.22593	1.1098	0.445328	0.156973	2.56107	35.0057	63.1083	150.155	27.9384	0.228262	0.152552	2.44353	0.0255572
AB08-11	1714.06	17.1406	1.76576		1.02346	37	0.00398282	0.000698083	6.69144	0.0768645	75.7518	12.1929	0.207166	1.17068	3.26666	1.70879	0.461397	0.330317	0.17789	2.18053	29.0716	56.7367	147.857	26.3171	0.0527594	0.247111	2.60488	0.199149
AB08-11	1714.61	17.1461	1.77126		1.30957	37	0.0161672	0.00108476	7.61346	0.106067	104.49	15.1535	0.105072	1.18174	4.64699	2.97836	1.61467	0.810797	0.21193	2.59779	32.0536	76.5957	168.123	31.9754	0.280812	0.752907	3.97814	0.447141
AB08-11	1715.16	17.1516	1.77676		1.27018	37	0.0130687	0.000100341	8.27648	0.127675	97.5374	13.4333	0.104671	0.922656	4.88007	5.34592	1.67924	0.724571	0.232939	4.61445	33.6762	76.371	186.284	31.9799	0.0988035	0.684786	4.67311	0.375742
AB08-11	1715.71	17.1571	1.78226		1.20447	37	0.0133956	4.30414e-05	7.57332	0.118003	97.6548	14.0924	0.169767	0.564906	6.91368	7.27108	1.48951	1.66814	0.352418	2.78706	34.4874	73.7125	173.792	31.5653	0.165805	0.726491	3.74481	0.262686
AB08-11	1716.26	17.1626	1.78776		1.18431	37	0.00233548	0.000255673	7.59876	0.108213	81.5051	12.7618	0.234267	0.474841	5.24719	4.885	1.80218	0.373529	0.180374	2.46578	34.8884	73.5386	173.632	29.563	0.197582	0.217265	3.19159	0.191998
AB08-11	1716.81	17.1681	1.79327		1.24244	37	0.00947988	0.000360126	7.42997	0.122718	128.66	13.8916	0.106945	0.292422	5.2423	3.95887	0.920809	0.655367	0.0596729	3.08779	32.8125	74.9985	182.58	30.0003	0.174897	0.299645	2.56497	0.09907
AB08-11	1717.36	17.1736	1.79877		1.32327	37	0.00546078	0.000376995	8.15993	0.140974	110.168	15.3997	0.111954	0.124591	5.35374	4.78051	0.661345	0.508224	0.225813	2.4583	35.9213	80.9638	180.357	32.0931	0.0669726	0.523058	2.44355	0.364615
AB08-11	1717.91	17.1791	1.80427		1.26878	37	0.0210684	0.000860936	8.14812	0.112303	108.167	14.128	0.402221	0.209229	4.15903	3.50587	0.789526	0.320984	0.174047	2.99006	35.0901	77.2594	181.054	31.6334	0.177881	0.304758	1.40141	0.136972
AB08-11	1718.46	17.1846	1.80977		1.30012	37	0.0114668	0.00031508	8.67447	0.131624	139.579	14.2141	0.261218	0.0335998	3.65269	2.58678	0.206062	0.0631952	0.27066	3.82599	32.7535	83.0016	183.012	33.4274	0.143419	0.0342827	0.850064	0.0289717
AB08-11	1719.01	17.1901	1.81527		1.23875	37	0.0250856	-0.000270478	8.0801	0.133127	121.367	14.0662	0.397169	0.206601	2.94816	1.56695	0.344166	0.146341	0.127088	2.65544	34.9327	76.7039	174.624	32.9679	0.027118	0.100066	0.489935	0.0279812
AB08-11	1719.56	17.1956	1.82077		1.30841	37	0.0171292	-0.000551981	7.2622	0.114669	116.825	14.0173	0.393178	0.635526	2.66379	1.13802	0.340707	0.0604212	0.236618	2.48172	34.0217	70.6595	179.2	30.6891	0.0268454	0.0990601	0.583333	0.0277
AB08-11	1720.11	17.2011	1.82627		1.29073	37	0.00908507	1.68347e-05	7.55199	0.124769	121.909	13.5585	0.178997	0.292291	2.29396	0.60092	0.0536145	0.145651	0.17105	3.67775	37.4884	70.9715	178.997	32.3785	0.0639473	0.232872	0.158121	-0.00773907
AB08-11	1720.66	17.2066	1.83177		1.25805	37	0.0129271	-4.01566e-05	6.99862	0.127256	83.795	13.6443	0.25046	0.248328	1.77721	0.153168	0.0534787	0.22997	0.215066	2.34131	35.5218	74.706	175.9	29.6187	0.0269217	0.0328709	0.0591202	-0.00771947
AB08-11	1721.21	17.2121	1.83727		1.35628	37	0.0106651	-0.000250424	8.97343	0.136051	128.016	14.3024	0.186262	0.304156	2.25381	0.359299	-0.0193731	0.239913	0.0852525	2.75019	34.9099	76.7897	171.696	29.8503	0.0665429	0.103636	0.0616762	0.0289796
AB08-11	1721.76	17.2176	1.84277		1.29029	37	-0.00179717	-0.00018733	8.30144	0.124297	125.743	14.2865	0.0355668	0.475916	2.0829	-0.00635276	0.0548001	0.148871	0.174833	2.70136	35.3452	71.3443	162.904	28.8413	0.0653613	0.0336831	0.127939	-0.0079102
AB08-11	1722.31	17.2231	1.84827		1.3631	37	0.0190785	-0.0010127	8.00676	0.140107	159.987	15.0362	0.342659	0.309893	2.83941	0.0950467	0.0568431	0.334455	0.181351	2.0184	34.3746	71.596	168.641	28.7116	0.146164	-0.0357134	0.027905	-0.00820511
AB08-11	1722.86	17.2286	1.85377		1.27663	37	-0.00180544	0.00016414	7.15784	0.126312	124.034	14.1372	0.109764	0.30013	2.48697	0.0592408	-0.0191167	0.0623757	0.0841241	2.1066	37.627	70.7537	151.357	27.6385	-0.0102345	0.0338381	-0.00680807	-0.00794661
AB08-11	1723.41	17.2341	1.85928		1.20358	37	0.0136614	-1.16506e-05	7.90915	0.132855	117.947	13.5396	0.106337	0.463182	2.34564	0.0573915	-0.0185199	0.144888	0.170154	3.07025	31.7864	69.2299	157.491	26.8341	-0.00991498	0.165362	0.0589599	-0.00769854
AB08-11	1723.96	17.2396	1.86478		1.35244	37	0.0030196	-0.00055002	7.77163	0.122292	106.419	14.2008	0.111692	0.305402	2.12925	0.0602816	0.0560194	0.595746	0.132162	3.37932	34.1711	70.1988	170.517	28.5281	0.0668157	0.104061	0.578354	-0.00808622
AB08-11	1724.51	17.2451	1.87028		1.2678	37	0.00654868	-0.000893336	7.88743	0.116638	120.668	14.0178	0.183896	0.300291	6.69966	0.0592726	-0.019127	-0.0248184	0.10706	2.25961	37.7435	79.9174	181.498	31.6747	0.0277287	0.102319	0.0608925	-0.00795087
AB08-11	1725.06	17.2506	1.87578		1.32997	37	0.0138229	-0.000805347	8.13993	0.134576	96.7413	14.5933	0.190916	0.496626	1.69549	0.0956179	-0.0198572	0.15535	0.0398537	2.34588	41.4855	81.3527	205.516	35.7854	0.0287873	0.390533	0.0280727	-0.00825442
AB08-11	1725.61	17.2561	1.88128		1.25431	37	0.0100564	0.000221215	7.6889	0.118988	97.0288	13.7628	0.403074	0.651521	1.62091	-0.00633762	0.128323	-0.0246326	0.174416	2.2427	37.1734	86.0626	206.542	35.0246	0.0652055	-0.0343477	-0.00676073	-0.00789135
AB08-11	1726.16	17.2616	1.88678		1.28194	37	0.0162606	-0.000991134	7.89535	0.122906	99.8941	14.5169	0.410176	0.213367	1.51659	0.0930228	0.280486	0.0630334	0.108131	4.27638	41.528	85.005	203.463	36.0677	0.0663545	0.103343	0.129883	-0.00803039
AB08-11	1726.71	17.2671	1.89228		1.38913	37	0.0204282	-0.000957586	8.2589	0.120675	102.648	14.6001	0.190856	0.635078	1.35359	0.0955876	0.211202	0.336358	0.087355	2.66039	37.3711	85.0717	200.925	37.65	-0.0106275	0.106192	-0.00706954	-0.00825181
AB08-11	1727.26	17.2726	1.89778		1.30403	37	0.0190093	-0.000692286	7.7273	0.117042	66.1329	14.0045	0.557919	0.436709	1.84257	0.0266181	14.8488	0.326231	0.0847248	2.12165	34.597	82.0832	194.107	35.7764	0.0279117	0.102995	0.0612944	-0.00800335
AB08-11	1727.81	17.2781	1.90328		1.30415	37	0.00863837	-0.000579477	8.80184	0.105422	79.0041	13.0817	0.249365	0.333309	1.70585	0.0572958	-0.018489	0.397601	0.0371078	3.21194	34.6212	78.2096	171.759	31.2237	0.0635062	-0.0334526	0.0588616	-0.0076857
AB08-11	1728.36	17.2836	1.90878		1.2946	37	0.00719015	-0.000673043	7.85633	0.102137	84.4617	13.5643	0.54241	0.468136	1.6626	0.925438	-0.018718	-0.0242878	0.0823697	1.91404	34.2013	71.839	168.235	30.2785	0.10145	0.23413	-0.00666609	-0.00778088
AB08-11	1728.91	17.2891	1.91428		1.29797	37	0.0302335	-0.00130815	7.91917	0.10519	83.5223	13.892	0.253	0.774774	3.34358	0.0903276	0.1268	0.317849	0.127447	2.66295	31.6287	67.9023	156.423	26.7431	0.176144	0.100349	-0.00668052	-0.00779773
AB08-11	1729.46	17.2946	1.91978		1.40858	37	0.0194419	-0.00110116	8.15629	0.106707	81.7857	14.9941	-0.0394541	0.354984	4.5941	0.0948194	-0.0196914	-0.0255507	0.0395209	3.26445	35.3843	69.8231	149.183	26.1156	0.380348	-0.035628	0.0975403	0.104738
AB08-11	1730.01	17.3001	1.92528		1.30228	37	0.0199111	0.000920096	7.79765	0.113862	91.2629	14.5322	0.402688	0.386042	38.5788	0.0913245	0.054617	0.148374	0.196946	1.18637	29.8754	61.8511	143.577	23.7096	1.75932	0.101456	0.261777	0.499669
AB08-11	1730.56	17.3056	1.93079		1.25448	37	0.0279242	-0.00072278	7.79646	0.0986213	112.406	13.6084	0.393261	0.333896	78.5768	0.0891866	0.0533385	0.0604339	0.125838	2.33517	30.9496	56.8438	116.303	20.8253	2.49024	0.099081	0.321211	0.417162
AB08-11	1731.11	17.3111	1.93629		1.28223	37	0.0253996	-0.000826514	8.10013	0.123714	110.412	14.1356	0.182097	0.473683	64.5903	0.0586927	0.128026	-0.0245756	0.151346	1.33515	32.0297	57.7778	123.129	20.4028	1.53135	0.033525	0.227901	0.354173
AB08-11	1731.66	17.3166	1.94179		1.29612	37	0.0297626	-0.000856238	7.89769	0.119877	101.417	14.3946	0.0354282	0.738768	46.5287	0.123807	0.128128	0.0618479	0.0153581	3.29288	30.2411	52.291	116.438	19.4421	1.11867	0.169247	0.160988	0.173288
AB08-11	1732.21	17.3221	1.94729		1.27593	37	0.0254716	0.000476565	7.89484	0.113684	87.7519	13.7951	0.469492	0.641814	38.0405	0.0579524	0.0538549	0.146304	0.104675	2.20928	29.93	47.5147	110.732	19.1933	0.583955	-0.033836	0.0264381	0.206713
AB08-11	1732.76	17.3276	1.95279		1.25701	37	0.0209927	-0.000552229	7.6623	0.115069	83.5952	13.4944	0.321609	0.635811	25.7483	-0.0061848	0.0533512	-0.0240386	0.0593533	2.04151	25.1708	51.5185	99.5896	17.3839	0.578493	0.165416	0.0589793	0.0631259
AB08-11	1733.31	17.3331	1.95829		1.2927	37	0.0295937	-0.000582994	7.96667	0.110274	89.5099	13.7573	0.250879	0.898162	15.0931	0.0576436	-0.0186013	0.315185	0.237686	2.49292	26.1164	50.0785	99.6762	17.4196	0.506993	0.23267	0.125062	0.0633824
AB08-11	1733.86	17.3386	1.96379		1.32967	37	0.0403928	-0.000961702	7.53033	0.10835	53.6544	15.1122	0.2606	0.932965	10.8236	0.0598772	-0.0193221	0.327398	0.1544	2.89637	30.1453	48.3797	97.8305	16.917	0.296503	-0.0349598	0.0273162	-0.00803197
AB08-11	1734.41	17.3441	1.96929		1.33965	37	0.0364882	0.000491127	7.07349	0.0998811	46.1183	13.4365	0.0339771	1.80859	8.11865	0.0875349	-0.0181786	0.473827	0.0582402	2.58062	23.9661	41.8241	91.835	15.3792	0.206784	0.162314	0.0900468	0.0619421
AB08-11	1734.96	17.3496	1.97479		1.29521	37	0.0464422	-0.000594523	7.24379	0.0836358	31.8003	13.8949	0.383799	0.746581	5.52272	0.149091	0.0520551	0.0589798	0.0795442	2.27898	26.1065	43.7907	98.6081	16.2121	-0.00967728	0.226099	0.0575465	0.0615924
AB08-11	1735.51	17.3551	1.98029		1.26667	37	0.0730688	-0.00128408	8.1096	0.0931475	37.6274	14.0657	0.0351897	3.10055	3.6155	0.122974	0.127265	0.0614315	0.172979	1.92522	27.1917	48.3228	106.879	19.2165	0.139416	1.17897	0.226548	-0.00782632
AB08-11	1736.06	17.3606	1.98579		1.28298	37	0.765456	-0.00111638	8.58074	0.10006	42.3526	14.5065	0.0353734	56.236	4.0249	1.48792	2.47761	0.579608	0.445677	3.43806	37.8232	56.2655	117.548	19.745	0.140144	4.16646	1.36659	0.0283102
AB08-11	1736.61	17.3661	1.99129		1.40437	37	3.48207	-0.000136817	13.4473	0.108629	46.3813	14.6552	0.428606	215.85	4.8484	4.70631	6.48104	3.65614	0.958529	11.3626	42.5803	59.118	127.329	21.1237	0.229621	11.0943	2.06533	0.145957
AB08-11	1737.16	17.3716	1.9968		1.26337	37	8.16629	0.000342145	18.5477	0.117936	60.9179	14.4345	0.446554	471.784	4.83444	12.31	12.0571	6.20708	1.82928	15.6811	53.6921	68.5888	124.77	22.6164	0.155738	22.7102	18.1	0.0716635
AB08-11	1737.71	17.3771	2.0023		1.23268	37	15.117	0.0033831	29.9522	0.118516	50.4113	11.9089	0.927363	821.535	5.7978	21.0269	23.126	10.8158	2.81242	24.1631	81.1143	82.4292	135.456	22.7796	0.154425	41.5847	4.31205	0.350108
AB08-11	1738.26	17.3826	2.0078		1.17834	37	29.6357	0.0612928	50.6391	0.106121	36.708	13.944	6.37202	1570.54	6.30126	70.0488	42.9942	22.9486	6.20879	44.4433	118.957	104.81	153.823	25.1448	0.254669	73.8966	7.12674	1.18899
AB08-11	1738.81	17.3881	2.0133		1.18586	37	45.5204	0.109131	71.3819	0.104959	57.0606	13.9659	9.91175	2335.07	10.3401	61.9048	56.4376	31.5392	8.0653	64.7421	143.264	121.8	175.812	23.4997	0.68599	97.1466	8.04371	0.83075
AB08-11	1739.36	17.3936	2.0188		1.27385	37	62.7833	0.124845	99.4559	0.101374	57.3744	14.0199	11.0792	3174.47	10.0931	92.7292	88.6789	44.2132	11.8398	73.8805	192.341	151.621	162.952	24.823	0.338968	129.881	8.98792	1.04644
AB08-11	1739.91	17.3991	2.0243		1.21558	37	88.4901	0.163996	138.855	0.111979	51.2504	12.0068	13.17	4465.17	10.8327	118.522	114.043	56.0125	15.2335	108.279	255.102	182.299	181.753	23.751	0.361086	174.917	7.74072	1.69947
AB08-11	1740.46	17.4046	2.0298		1.1632	37	128.074	0.192144	183.631	0.0941363	55.1308	12.365	18.5193	6171.85	11.409	216.963	153.249	74.1491	19.9387	152.455	320.542	226.202	219.836	28.0443	0.198332	220.368	7.43517	2.39519
AB08-11	1741.01	17.4101	2.0353		1.47891	37	166.191	0.221574	245.339	0.119237	70.2672	14.5644	17.0877	8078.43	14.6711	185.749	196.275	96.9644	25.5195	183.229	393.002	271.953	234.311	29.6019	0.606497	258.686	8.16024	2.3278
AB08-11	1741.56	17.4156	2.0408		1.50768	37	133.635	0.16634	194.619	0.134558	68.0479	11.7881	12.2271	6382.11	8.45585	149.564	166.824	76.5966	20.0996	143.91	302.104	213.475	181.94	23.7277	0.35002	190.78	7.2264	2.14256
AB08-11	1742.11	17.4211	2.0463		1.81297	37	119.745	0.139937	180.139	0.179356	57.4809	11.6475	7.81799	5817.39	7.60949	131.511	141.765	63.6656	18.7929	127.742	274.069	193.391	162.868	21.2995	0.457373	150.613	5.45697	1.1998
AB08-11	1742.66	17.4266	2.0518		2.12348	37	87.6609	0.0930809	131.253	0.194689	47.8344	10.1981	5.58906	4273.51	5.16236	99.0469	92.6263	48.1459	12.397	88.9972	187.734	134.053	134.035	16.6593	0.28066	107.598	3.65976	0.933024
AB08-11	1743.21	17.4321	2.0573		2.54264	37	65.6136	0.0734208	101.405	0.251385	52.2063	10.9785	3.68165	3361.42	6.17897	73.0463	75.9958	33.2882	9.31146	64.8629	138.479	105.035	113.291	14.8802	0.0871165	75.3338	3.22341	0.571247
AB08-11	1743.76	17.4376	2.0628		3.01989	37	50.6466	0.0676613	77.5932	0.344493	60.2873	11.334	2.69855	2676.99	6.34658	52.4625	55.2096	24.1093	6.1893	46.3206	102.804	87.7706	110.006	16.7339	0.54975	56.4476	28.0784	0.532228
AB08-11	1744.32	17.4432	2.06831		3.15663	37	27.1944	0.0440459	45.774	0.345951	56.3192	11.3978	1.38828	1746.85	5.83741	30.4217	30.1036	14.1535	3.68117	26.1601	69.4874	64.2167	110.915	18.6035	0.144106	35.3809	2.95563	0.344722
AB08-11	1744.87	17.4487	2.07381		3.02589	37	15.2462	0.0244453	27.4313	0.358894	92.9342	11.0495	0.511961	1163.56	4.46449	20.7036	16.1628	7.776	2.67463	13.7638	45.7583	54.407	100.722	17.6126	0.0828202	24.3078	1.52771	0.358709
AB08-11	1745.41	17.4542	2.07931		2.87413	37	8.26981	0.0181286	16.3675	0.316154	83.2413	11.0155	0.04166	797.282	3.12965	10.8631	9.92346	3.83372	1.35181	6.34992	29.6096	52.5984	102.473	18.1987	0.120805	12.8883	1.05718	0.118555
AB08-11	1745.96	17.4597	2.08481		2.72864	37	4.99055	0.0126868	12.698	0.303634	79.5996	11.6133	0.0411627	578.336	3.0923	5.92911	5.27558	1.77926	0.676758	6.62388	29.9222	45.8723	99.9991	17.8986	0.0319273	9.81619	0.732735	0.0329436
AB08-11	1746.52	17.4652	2.09031		2.61309	37	2.78819	0.00875972	10.5874	0.301309	82.5641	12.2515	0.3901	428.777	1.99598	3.58021	2.85461	1.61051	0.448496	5.50967	27.8141	47.8018	108.926	20.3943	0.0325771	8.16521	0.469252	0.0336141
AB08-11	1747.07	17.4707	2.09581		2.06976	37	1.48812	0.00549224	8.28355	0.216649	74.3581	11.7874	0.116202	265.186	2.14562	3.74541	2.33534	0.988975	0.234379	3.35506	29.9428	50.1496	113.161	19.7534	0.109687	4.60025	0.673341	0.146331
AB08-11	1747.62	17.4762	2.10131		1.87577	37	0.911791	0.00421224	8.53764	0.198739	90.1414	12.9963	0.197297	184.808	1.68158	1.26112	1.4922	0.441295	0.286773	2.42429	27.7779	53.9583	123.957	23.0991	0.151957	3.26823	0.610117	0.0306965
AB08-11	1748.16	17.4817	2.10681		1.82605	37	0.440452	0.00407208	7.60995	0.172642	90.7023	13.125	0.344386	118.222	2.58081	1.28726	0.826806	0.426611	0.182265	2.81619	29.8512	61.4708	141.717	25.0623	0.10752	2.4494	1.22181	0.0296751
AB08-11	1748.71	17.4872	2.11231		1.65262	37	0.299294	0.00383528	8.34573	0.149656	103.32	14.3331	0.679982	76.4203	2.69284	0.952333	0.782387	0.633924	0.239721	1.95226	34.7966	69.0352	163.415	29.3925	0.030008	1.963	2.52079	0.0309632
AB08-11	1749.27	17.4927	2.11781		1.60719	37	0.326606	0.0052171	9.16348	0.120129	99.4072	14.0337	1.15267	45.0375	4.35285	1.18143	0.726632	0.501079	0.176624	3.18699	30.2826	72.6439	166.653	29.4756	0.104192	1.34143	3.39623	0.102253
AB08-11	1749.82	17.4982	2.12331		1.49683	37	0.109426	0.00517084	8.24249	0.114327	94.915	14.3367	0.49519	26.459	3.58428	1.48302	1.35777	0.604075	0.181222	3.42657	34.2509	76.8696	168.071	31.7577	0.14606	1.02334	4.46247	0.180323
AB08-11	1750.37	17.5037	2.12881		1.61614	37	0.102214	0.00452406	8.35887	0.128237	94.4486	14.7489	0.768154	16.6477	3.95904	1.65001	1.00886	0.752079	0.173847	2.53589	33.8112	68.4239	179.661	30.0961	0.290362	0.778513	4.68308	0.136815
AB08-11	1750.92	17.5092	2.13432		1.50024	37	0.0953593	0.00335105	8.05941	0.112645	99.0101	14.7067	0.561344	11.3554	5.18567	1.35673	1.33346	1.3	0.177978	3.51905	34.9069	69.333	154.917	28.4213	0.451076	1.49039	5.17147	0.140066
AB08-11	1751.47	17.5147	2.13982		1.42091	37	0.0403189	0.00507069	7.74486	0.112381	59.8094	13.6652	0.532388	7.00411	4.98137	1.25521	1.40724	0.814015	0.234759	2.31633	33.1987	62.4282	135.008	25.0594	0.172516	1.01894	4.44948	0.273318
AB08-11	1752.02	17.5202	2.14532		1.33087	37	0.107191	0.000841372	6.50833	0.102451	39.0059	13.9762	0.102829	12.8349	4.23983	1.80789	1.5802	0.630143	0.0573762	2.96895	29.294	58.0739	132.724	21.4088	0.132615	1.05735	3.89321	0.163725
AB08-11	1752.57	17.5257	2.15082		1.26215	37	0.0483619	0.0014938	7.33486	0.105266	32.4043	13.1596	0.378228	5.09041	7.28172	1.03359	0.880656	0.220599	0.0783896	3.3775	25.0104	49.4717	104.263	17.6557	1.72317	0.860436	3.96707	0.196905
AB08-11	1753.12	17.5312	2.15632		1.37404	37	0.0567625	0.00190484	8.45087	0.090504	39.0354	14.1603	0.427508	8.19148	35.1281	1.65208	1.22975	1.25939	0.257278	3.4978	31.7168	49.2243	100.915	16.4649	1.78782	1.62117	5.37519	0.953837
AB08-11	1753.67	17.5367	2.16182		1.26328	37	0.0222213	0.00429021	7.18717	0.100369	29.8846	13.2132	0.181875	12.4992	73.5236	1.58463	1.00859	1.01068	0.219079	2.38499	24.3672	43.7323	87.3982	14.0434	0.816004	1.3877	3.50934	0.498383
AB08-11	1754.22	17.5422	2.16732		1.11652	37	0.0506249	0.00975847	6.26883	0.0692032	19.4877	12.3437	0.64988	20.7673	53.9381	1.48242	0.943536	1.18761	0.226127	3.07429	24.4002	38.6247	69.2022	11.6822	0.763372	1.99497	3.31431	0.533894
AB08-11	1754.77	17.5477	2.17282		1.0812	37	0.0245744	0.0154818	6.25565	0.0714358	18.2328	11.132	0.371746	22.7513	34.0453	1.9778	0.933492	0.216819	0.181813	2.34644	20.0844	34.594	64.2915	9.77747	0.720491	2.78843	3.31002	0.394339
AB08-11	1755.32	17.5532	2.17832		1.16577	37	0.0483728	0.022748	6.59187	0.0613446	22.4729	11.2791	0.91624	27.2642	13.6342	1.59072	1.00368	0.697461	0.203223	2.6304	23.311	34.089	57.7653	9.0176	0.547946	2.22942	3.34854	0.093336
AB08-11	1755.87	17.5587	2.18382		1.04033	37	0.0284847	0.0363725	5.37915	0.064453	16.1005	10.491	1.11056	27.2078	7.04359	2.50048	0.938201	0.95118	0.111443	1.28656	23.9387	36.7697	60.3256	7.88392	0.251709	1.79042	3.44972	0.212668
AB08-11	1756.42	17.5642	2.18932		0.94646	37	0.0363677	0.0478948	5.95141	0.0613699	28.1626	10.6183	2.08465	26.9461	5.9756	1.3313	1.07644	0.129646	0.11259	1.95774	22.4322	37.0259	58.5013	9.32723	0.188506	1.27499	2.04747	0.119822
AB08-11	1756.97	17.5697	2.19482		1.01001	37	0.0423175	0.050655	6.17627	0.0647441	16.5701	11.1477	1.60059	18.945	6.60979	1.41413	3.51992	0.209055	0.215709	2.39647	24.1263	39.2761	69.4633	10.6565	0.0579842	1.54051	2.17536	0.122061
AB08-11	1757.52	17.5752	2.20032		1.26411	37	0.0453647	0.03863	7.03887	0.0678189	39.0916	12.1145	2.04928	18.4684	3.01397	1.34947	1.02659	0.0585631	0.0575023	1.55029	27.2785	46.6628	82.5159	14.3614	0.0972775	2.47304	2.78964	0.232703
AB08-11	1758.07	17.5807	2.20583		1.30813	37	0.0244891	0.0295448	7.59297	0.0848667	50.216	14.2346	0.880204	15.5231	4.75414	9.17066	4.28078	2.14076	0.560876	5.16751	35.3691	58.1152	102.131	17.6533	0.618081	20.9478	37.1338	1.77011
AB08-11	1758.62	17.5862	2.21133		1.21245	37	0.0361181	0.0175888	6.57044	0.0908022	57.9789	12.4187	0.654039	25.9264	33.343	142.404	76.5533	20.5307	5.92	21.06	59.7477	59.8595	115.783	19.2975	2.4299	51.8764	150.927	8.98514
AB08-11	1759.17	17.5917	2.21683		1.20405	37	0.0490765	0.0109713	7.34634	0.105493	108.963	12.9547	0.536134	63.1976	76.254	494.394	287.526	87.0501	15.8126	68.3548	97.9321	88.3265	135.853	22.4895	6.38169	117.117	320.656	20.7765
AB08-11	1759.72	17.5972	2.22233		1.22033	37	0.0623666	0.00734962	8.31605	0.106718	112.491	13.917	0.382217	98.4857	128.684	785.545	436.071	116.211	16.6368	103.612	164.679	111.88	160.668	25.4259	8.46122	165.672	380.737	28.2204
AB08-11	1760.27	17.6027	2.22783		1.16236	37	0.055389	0.00587537	8.95251	0.120797	106.961	13.4781	0.551727	126.748	134.905	1341.18	479.494	114.644	20.2732	91.9885	143.774	107.993	156.022	26.026	8.86166	180.453	426.799	30.1948
AB08-11	1760.82	17.6082	2.23333		1.4275	37	0.0636003	0.00822239	8.53171	0.162814	134.201	13.065	0.320607	181.411	177.704	1285.64	551.752	144.396	26.4566	115.123	158.753	123.889	167.884	25.8645	10.4048	228.349	569.703	29.4126
AB08-11	1761.37	17.6137	2.23883		1.54233	37	0.0557258	0.00583749	8.39806	0.156953	136.46	13.811	0.592472	200.96	239.508	1141.49	524.057	133.669	20.2135	259.351	155.306	118.978	158.915	25.0198	9.48029	213.643	487.279	30.8678
AB08-11	1761.92	17.6192	2.24433		1.49885	37	0.0570613	0.00633275	8.03019	0.174632	118.537	12.8895	0.314256	235.571	173.492	1044.09	477.187	123.237	17.4243	82.7241	109.358	108.414	162.91	23.9285	6.78309	202.762	386.464	19.9468
AB08-11	1762.47	17.6247	2.24983		1.57199	37	0.058679	0.00549443	8.91507	0.193897	107.104	12.8975	0.318941	209.718	106.971	780.298	323.886	79.6433	13.3688	69.1936	91.4023	95.0566	141.386	23.2106	4.73208	141.213	253.89	17.4286
AB08-11	1763.02	17.6302	2.25533		1.72058	37	0.0482413	0.00420046	8.39803	0.181842	149.94	13.3224	0.180523	196.02	72.7176	702.664	241.263	69.1287	10.4911	39.5109	73.4104	85.5379	138.084	22.1505	3.71756	108.439	154.919	11.7004
AB08-11	1763.57	17.6357	2.26083		1.79599	37	0.0323647	0.00272462	7.90491	0.196249	112.951	15.62	0.415655	201.503	50.6863	305.698	138.98	41.5954	7.46817	37.1498	54.3199	74.4089	148.2	22.6143	2.36002	73.6887	131.371	8.49021
AB08-11	1764.12	17.6412	2.26633		1.76541	37	0.0344023	0.00368999	7.628	0.197837	104.611	13.6186	0.18385	177.266	38.8974	191.073	108.817	20.8217	4.24988	16.8388	43.9979	66.6024	134.101	19.4334	1.35629	44.9228	86.0768	4.56229
AB08-11	1764.67	17.6467	2.27184		1.78047	37	0.0265658	0.00307438	7.21944	0.175633	114.87	13.6497	0.263058	135.26	26.9738	170.233	54.9561	11.8956	2.18686	10.2044	39.2742	66.8521	119.258	19.9811	1.11237	28.4711	44.7402	2.11743
AB08-11	1765.22	17.6522	2.27734		1.65142	37	0.0430169	0.00299582	7.9341	0.173892	103.325	14.7713	0.34688	87.9511	11.8803	125.224	18.1247	15.5593	1.30752	6.4859	40.6387	62.5799	128.652	21.7386	0.861941	23.1514	17.2318	1.63413
AB08-11	1765.77	17.6577	2.28284		1.52643	37	0.05296	0.00102214	7.6236	0.155946	128.535	14.5525	0.113747	57.568	14.9834	28.8383	10.5884	2.32324	1.29631	5.95837	35.3988	59.1155	131.605	21.3903	0.382647	13.1582	16.0305	0.635532
AB08-11	1766.32	17.6632	2.28834		1.47966	37	0.0399643	0.000108469	8.13842	0.152153	120.776	14.2177	0.11315	38.5285	6.496	24.752	10.9917	2.94015	0.464066	4.20584	32.0361	56.6938	130.914	21.7984	0.145926	4.90267	5.71468	0.330839
AB08-11	1766.87	17.6687	2.29384		1.39712	37	0.0368754	-0.000306536	8.2207	0.12375	109.442	15.2345	0.110052	28.6619	5.72419	12.7671	6.00503	2.33519	0.451358	3.63409	31.6411	56.4871	116.65	19.6715	0.0277866	5.04285	6.13522	0.468334
AB08-11	1767.42	17.6742	2.29934		1.37286	37	0.0190116	0.00116596	8.31578	0.112522	117.018	14.087	0.112937	11.851	9.46159	7.05196	4.71175	2.84491	0.180715	9.50978	36.2365	60.0033	119.708	20.4468	0.145651	1.93574	2.32575	0.217418
AB08-11	1767.97	17.6797	2.30484		1.33868	37	0.0185293	-0.000463243	7.6005	0.134251	112.625	13.9384	0.247848	8.41812	3.2755	4.97893	2.76223	1.56846	0.19083	3.04649	27.1889	51.3744	114.138	17.567	0.172557	2.86095	1.7826	0.273384
AB08-11	1768.52	17.6852	2.31034		1.31898	37	0.0158251	-0.000219323	7.70132	0.108457	115.834	14.3921	0.259986	5.41874	2.44147	4.32879	1.62608	0.854085	0.292454	3.96101	32.7931	53.2492	122.249	19.0814	0.104477	1.89708	1.18722	0.0288351
AB08-11	1769.07	17.6907	2.31584		1.35206	37	0.0232768	-0.000734186	7.97715	0.124665	118.693	13.7863	0.108025	12.6068	2.25346	6.42202	6.84336	0.404587	0.352982	3.11898	31.0584	57.2543	123.273	19.9713	-0.0100724	0.976096	3.05738	-0.00782073
AB08-11	1769.62	17.6962	2.32134		1.36169	37	0.0213718	0.000133022	8.13552	0.107541	146.089	15.5604	0.327417	3.06213	2.77798	2.35717	1.44465	1.17971	0.263571	1.47933	34.7465	63.0421	132.91	22.677	0.102222	1.72112	1.76279	0.208478
AB08-11	1770.17	17.7017	2.32684		1.23443	37	0.0134765	0.000709936	8.44251	0.106833	127.593	14.1466	0.326341	10.1004	2.8335	2.44621	1.95044	0.747177	0.352695	2.8179	36.053	65.8229	144.238	26.3625	0.101886	0.437001	0.991431	0.135924
AB08-11	1770.72	17.7072	2.33234		1.32675	37	0.0288582	-0.000423523	7.35439	0.123224	148.262	14.2054	0.109904	3.28588	2.68764	2.16226	1.83745	0.23704	0.38203	3.47721	38.6392	71.6937	163.972	27.8185	0.103743	0.787533	0.840112	0.0652219
AB08-11	1771.27	17.7127	2.33784		1.31285	37	0.0239362	0.000242879	7.40389	0.106414	118.407	13.9845	0.462418	3.29056	2.39622	8.37572	1.33937	0.648098	0.411707	2.61477	36.1614	70.8969	151.495	26.9083	0.0632662	0.757829	0.743226	0.0627619
AB08-11	1771.82	17.7182	2.34335		1.32453	37	0.0231333	0.00772028	7.99669	0.106261	106.765	14.0562	1.70041	4.51583	1.85374	1.98383	1.50473	0.572636	0.306053	2.95129	36.1433	72.3151	161.559	26.0684	0.101341	1.37165	0.820662	0.67133
AB08-11	1772.37	17.7237	2.34885		1.22091	37	0.0154619	0.022678	7.63118	0.122065	114.79	14.4968	2.1685	2.55482	2.51609	3.87283	3.7589	0.478799	0.234722	3.62873	35.9702	73.0822	158.93	27.2516	0.063095	0.953031	0.416103	0.062592
AB08-11	1772.92	17.7292	2.35435		1.42526	37	0.0194851	0.0195616	8.31197	0.113467	109.186	15.4959	2.50577	2.59772	2.38108	1.88446	3.42953	0.591824	0.200673	3.81742	34.9195	73.0233	166.093	28.2186	0.181458	0.587567	0.984967	0.139726
AB08-11	1773.47	17.7347	2.35985		1.30464	37	0.031954	0.0159223	9.09406	0.111107	96.3019	14.3947	1.04454	3.02365	3.06332	2.19969	3.44965	0.315562	0.260259	2.05226	37.6882	71.4765	159.008	28.8713	0.0639683	0.966222	0.454824	0.455058
AB08-11	1774.02	17.7402	2.36535		1.30026	37	0.0245431	0.0103937	7.44942	0.0986307	93.8994	14.6856	1.18658	4.2732	2.22653	2.80182	1.49597	0.484527	0.304271	2.63889	36.9626	78.0137	178.724	29.2742	0.100751	0.964432	0.914582	0.134409
AB08-11	1774.57	17.7457	2.37085		1.28571	37	0.0150932	0.00515909	8.42569	0.116273	107.178	13.8972	0.46156	3.24167	3.15054	3.68681	3.19147	1.48533	0.21292	2.46393	36.4644	77.6334	181.058	30.7122	0.0631489	0.822231	5.26639	0.168077
AB08-11	1775.12	17.7512	2.37635		1.26008	37	0.00492706	0.00486454	9.0808	0.112649	121.016	14.0377	0.329869	5.07572	1.81851	4.0388	2.70876	1.36185	0.1291	2.09395	41.2312	81.1523	187.999	33.6455	0.0275473	0.781802	0.934891	-0.00789886
AB08-11	1775.67	17.7567	2.38185		1.36557	37	0.0215908	0.00171496	7.36741	0.130211	120.207	14.5596	0.552142	2.91612	2.67538	42.1835	6.93065	1.01801	0.289075	2.25098	39.1351	81.797	185.69	33.0775	0.0276227	0.374734	0.5665	0.174192
AB08-11	1776.22	17.7622	2.38735		1.29805	37	0.003632	0.00115075	8.09745	0.121261	98.7579	15.2348	0.534873	2.95379	1.82994	5.50818	2.55961	0.733637	0.567203	3.93936	34.7486	79.102	186.825	29.7532	0.319883	1.88258	1.0388	0.309877
AB08-11	1776.77	17.7677	2.39285		1.37724	37	0.0362664	0.000778099	8.44148	0.111532	91.6983	15.2587	0.330811	5.0015	10.8057	2.61055	3.38189	1.10503	0.289109	2.09992	30.0179	74.8281	167.584	28.9061	0.292421	4.05876	2.86031	0.174212
AB08-11	1777.32	17.7732	2.39835		1.28954	37	0.0146477	0.000607109	8.88262	0.0991966	94.6569	12.8802	0.601346	6.5948	15.861	8.73277	2.75153	0.811059	0.211999	2.45327	29.3891	64.0289	144.517	24.3005	0.317241	1.60494	1.3218	0.202342
AB08-11	1777.87	17.7787	2.40385		1.18627	37	0.0210999	0.00150625	7.64893	0.087173	62.7727	13.8152	0.103134	5.04925	12.287	2.73816	1.93334	0.959677	0.208023	2.69252	26.666	56.587	129.134	22.8957	0.168665	2.53925	1.36059	0.335889
AB08-11	1778.42	17.7842	2.40936		1.27805	37	0.0765375	0.00191418	7.55675	0.0811242	71.0515	13.3268	0.177238	8.61629	12.4199	2.96869	2.48485	0.648638	0.257617	2.76333	27.0891	52.0131	123.722	24.3675	0.24629	1.94618	2.08186	0.133292
AB08-11	1778.97	17.7897	2.41486		1.27127	37	0.55776	0.00294853	8.438	0.10558	58.1097	14.5328	0.108471	43.5083	9.67219	17.2934	3.86576	1.61241	0.693572	3.73189	32.5193	62.9361	132.807	24.6864	0.252395	3.82086	10.6993	0.461606
AB08-11	1779.52	17.7952	2.42036		1.21219	37	2.29465	0.0011314	11.3206	0.101994	62.9578	12.9922	0.17029	126.121	5.71667	20.8447	14.3472	3.28876	0.692657	7.86017	32.1838	57.959	130.458	24.794	0.0608369	8.52921	3.00369	0.568211
AB08-11	1780.07	17.8007	2.42586		1.21772	37	5.70991	0.00098637	17.8245	0.0908035	67.1024	13.9666	0.322294	280.623	4.39526	16.4519	13.5253	4.54792	1.57034	10.1554	44.3078	69.4684	148.155	28.7228	0.321747	21.6434	4.03594	0.631083
AB08-11	1780.62	17.8062	2.43136		1.29951	37	9.57796	0.00145012	24.2682	0.0917757	84.7562	13.4106	0.26752	434.585	4.76408	45.7605	22.8424	9.20182	2.34265	15.7341	57.7391	84.5644	183.587	31.1241	0.0287554	28.4563	4.20665	0.977572
AB08-11	1781.17	17.8117	2.43686		1.22906	37	13.4351	0.000228858	28.6942	0.105314	90.97	14.3107	0.340941	591.127	5.12238	37.4872	32.3774	12.5155	2.71912	23.0677	62.2207	91.652	188.49	34.082	0.184417	36.9082	5.55625	0.855308
AB08-11	1781.72	17.8172	2.44236		1.33545	37	16.0737	1.77934e-05	30.75	0.0940137	91.1463	13.2169	0.341602	705.128	5.19998	48.9279	40.3106	14.7841	3.85525	21.3936	67.1058	97.6575	194.125	34.557	0.106651	38.5328	5.74115	1.04504
AB08-11	1782.27	17.8227	2.44786		1.22265	37	16.2267	-0.000209442	30.525	0.100796	81.9619	12.8797	0.604718	741.689	3.34506	49.2975	42.3571	14.5858	3.5402	21.6212	66.862	89.3123	178.768	32.4434	0.172853	37.1688	4.39302	1.08318
AB08-11	1782.82	17.8282	2.45336		1.27508	37	17.6669	0.000561327	34.8013	0.112105	121.686	14.0675	0.645881	806.238	5.19561	52.8569	38.2148	14.2328	3.87553	24.3434	73.2988	99.0311	198.555	33.4878	0.0285031	36.6664	6.64175	0.81866
AB08-11	1783.37	17.8337	2.45886		1.48817	37	18.7629	-0.000598977	35.6543	0.117993	128.564	14.5982	0.44979	841.8	4.72376	65.6221	42.6558	15.142	4.07405	25.3863	75.1282	104.897	195.467	35.4413	0.0307108	36.9238	5.24294	0.882071
AB08-11	1783.92	17.8392	2.46436		1.43859	37	15.9056	-0.000854955	31.1877	0.109308	109.896	15.0758	0.431285	708.869	4.18012	52.1535	36.6412	13.5927	2.71504	18.3708	59.7426	96.7469	183.029	30.4923	0.231057	31.1797	4.73927	1.11758
AB08-11	1784.47	17.8447	2.46986		1.40263	37	13.0293	-0.000670821	26.8954	0.112831	109.126	13.848	0.51204	561.81	4.47784	35.6972	31.644	10.206	2.87262	15.8549	49.9095	80.8429	174.023	29.3722	0.15103	23.9969	4.86736	0.576335
AB08-11	1785.02	17.8502	2.47537		1.42566	37	10.753	0.000337397	23.4156	0.11708	139.528	14.3881	0.038764	444.374	5.19532	28.6199	24.6895	8.86477	2.02752	13.1563	53.4698	76.607	169.047	30.755	0.0712368	18.9022	6.89599	0.38783
AB08-11	1785.57	17.8557	2.48087		1.39057	37	8.13763	-0.000646641	20.1771	0.117253	112.871	15.2895	0.118464	336.65	5.16834	26.8731	16.4725	6.7478	1.64637	9.15606	46.9517	81.7028	167.23	29.5307	0.193736	15.5517	3.06035	0.543573
AB08-11	1786.12	17.8612	2.48637		1.2879	37	5.53752	0.000492573	15.4769	0.116044	93.0122	14.3454	0.110983	240.845	4.17719	16.1648	11.0061	4.82314	1.47301	7.19497	39.4087	75.3997	179.342	31.1332	0.0663917	8.61543	2.59341	0.583144
AB08-11	1786.67	17.8667	2.49187		1.24934	37	3.42078	0.000157433	12.5521	0.0990143	105.792	14.3482	0.460318	146.752	3.39493	14.9241	10.3692	3.73902	0.870648	3.47646	35.3495	79.5952	184.751	32.8005	0.281364	6.26863	1.87597	0.377921
AB08-11	1787.22	17.8722	2.49737		1.29317	37	2.11894	-0.000988163	10.9089	0.115806	104.547	14.3992	0.0349543	96.3911	4.49177	13.5179	4.69756	1.59619	0.507542	5.03083	37.7516	82.2908	199.525	36.5658	0.0642358	4.85345	2.2113	0.671454
AB08-11	1787.77	17.8777	2.50287		1.33667	37	1.38921	-0.000441275	8.96446	0.208336	109.773	14.7716	0.467934	61.7481	2.93763	8.15539	5.47803	1.33584	0.461231	5.45801	39.2225	86.8444	217.037	39.9803	0.13802	4.17005	1.51082	0.241657
AB08-11	1788.32	17.8832	2.50837		1.4089	37	0.806423	0.000439483	9.0616	0.36351	109.168	13.9742	0.460679	35.919	3.20764	6.83119	4.1109	2.23565	0.629765	4.49915	36.8573	92.2908	224.666	39.8233	0.0266022	4.43381	3.53409	0.69391
AB08-11	1788.87	17.8887	2.51387		1.22403	37	0.451337	-0.000142334	8.33118	0.484635	109.068	13.6783	0.628918	24.6109	3.11205	9.70029	4.70045	1.85221	0.526268	5.15094	38.4549	80.2382	202.545	37.1237	0.0588239	6.59066	3.96547	1.20415
AB08-11	1789.42	17.8942	2.51937		1.31867	37	0.289608	-0.000683618	9.2721	0.478747	111.971	18.6528	0.330048	36.4608	3.25801	31.736	17.2453	6.47899	1.9269	9.7959	52.9459	94.9176	231.256	41.1646	0.178525	9.90392	6.11934	2.97257
AB08-11	1789.97	17.8997	2.52487		1.35114	37	0.18765	0.00036576	7.48275	0.330874	75.6283	17.0089	0.220212	67.3149	4.20236	84.9316	43.4045	12.416	3.04236	16.3238	62.6831	87.6212	191.985	32.9739	0.0884932	16.1094	13.7043	7.05
AB08-11	1790.52	17.9052	2.53037		1.33294	37	0.156834	0.000396402	8.55402	0.279466	99.9814	13.224	0.444247	140.753	5.34558	181.379	95.1909	28.0691	6.34804	34.1424	92.5923	113.455	201.002	34.2419	0.622809	28.0511	25.7474	15.2277
AB08-11	1791.07	17.9107	2.53587		1.17347	37	0.106039	-0.000236419	8.06843	0.213074	95.6694	14.507	0.105015	229.759	8.60858	318.677	179.862	45.2065	11.3367	65.099	129.818	141.219	211.614	35.7262	0.280661	43.9516	45.2732	23.4475
AB08-11	1791.62	17.9162	2.54137		1.20324	37	0.109057	0.000463833	9.86029	0.196706	109.424	13.372	0.261201	366.102	14.0476	482.295	276.907	66.7036	18.3858	87.5751	177.462	170.038	233.909	37.0731	0.758519	61.9052	64.877	32.6631
AB08-11	1792.17	17.9217	2.54688		0.975306	37	0.19055	0.000593635	9.29772	0.143073	109.98	11.9761	0.230742	435.065	15.4715	617.871	321.822	93.1602	20.0768	110.46	194.415	169.742	227.634	32.3081	0.602145	72.8855	74.5348	39.4279
AB08-11	1792.72	17.9272	2.55238		0.998272	37	0.0755425	0.00112818	9.00124	0.124671	113.943	11.0822	0.432899	522.826	19.0968	786.574	435.983	118.65	25.9016	134.962	231.416	190.793	229.53	32.2699	0.675359	84.3159	90.5138	51.1394
AB08-11	1793.27	17.9327	2.55788		1.00408	37	0.218957	0.00119548	10.1536	0.12804	120.483	11.5847	0.493539	688.615	26.7135	1050.56	543.939	135.81	30.8505	169.067	283.121	228.8	259.885	35.564	1.16021	111.908	140.721	64.0138
AB08-11	1793.82	17.9382	2.56338		0.849319	37	0.131923	0.000369047	8.92284	0.11818	100.966	10.5228	0.47739	623.622	48.8485	1227.63	604.844	165.904	38.3116	221.365	306.405	216.134	226.35	31.6609	5.51893	156.321	326.117	82.6402
AB08-11	1794.37	17.9437	2.56888		0.950323	37	0.0774712	0.00334664	11.2909	0.334462	165.293	11.1671	1.06535	938.045	269.568	3245.01	1506.48	416.09	80.034	402.803	558.523	354.042	338.189	43.1896	24.4846	387.968	1370.77	172.984
AB08-11	1794.92	17.9492	2.57438		0.902449	37	0.16279	0.00838981	10.7983	0.818385	160.248	9.20866	0.785099	1032.79	512.603	4757.2	2432.65	554.075	108.692	544.879	579.696	319.114	298.232	35.8462	33.2515	422.237	1732.01	177.972
AB08-11	1795.47	17.9547	2.57988		0.812429	37	0.228033	0.0132652	12.677	1.35659	190.405	10.2346	0.658576	1376.27	912.349	6252.47	3256.6	754.998	142.037	654.741	727.365	391.41	336.465	42.971	44.0877	515.852	2222.27	218.639
AB08-11	1796.02	17.9602	2.58538		0.766567	37	0.253781	0.0138684	14.7633	1.7175	184.366	9.60759	0.928981	1445.54	929.146	8042.83	3715.07	869.559	151.403	735.41	735.736	376.845	339.664	41.3439	45.633	538.071	2332.32	218.769
AB08-11	1796.57	17.9657	2.59088		0.683716	37	0.190815	0.0136345	12.2018	1.56727	155.157	8.95838	0.807607	1480.59	922.722	7072.61	3344.41	782.716	139.872	670.198	642.872	346.329	312.976	38.1929	45.8685	494.16	2155.07	212.92
AB08-11	1797.12	17.9712	2.59638		0.82422	37	0.133461	0.0137714	13.2157	1.40462	188.436	10.1203	1.10747	1606.51	988.493	7022.19	3649.1	808.176	139.226	661.593	618.954	341.497	303.124	38.9225	46.0101	481.321	2025.75	198.872
AB08-11	1797.67	17.9767	2.60188		0.744879	37	0.150516	0.00944294	11.4339	0.954349	156.918	9.37592	0.746181	1231.78	805.586	5661.67	2843.56	613.014	102.202	472.053	480.823	255.833	248.914	32.5736	33.5896	349.063	1526	148.445
AB08-11	1798.22	17.9822	2.60738		0.926572	37	0.119032	0.00983266	12.9812	0.769767	184.592	11.5562	0.721869	1032.87	712.755	4786.33	2320.29	533.149	97.1675	426.958	410.871	230.567	239.134	31.9668	28.1797	303.206	1284.02	121.815
AB08-11	1798.77	17.9877	2.61289		1.00114	37	0.0838244	0.00808087	11.5454	0.641855	165.161	12.4701	1.03345	768.185	499.357	3540.48	1700.46	363.097	64.7992	311.685	298.742	195.05	217.825	27.9681	19.3684	216.817	847.818	83.6262
AB08-11	1799.32	17.9932	2.61839		1.1005	37	0.0859717	0.00542031	10.4704	0.36875	154.783	12.0816	0.641586	536.79	308.39	1958.72	1021.13	259.683	42.8387	183.381	188.463	124.279	161.859	24.0473	10.6926	134.262	494.823	51.9145
AB08-11	1799.87	17.9987	2.62389		1.24449	37	0.150644	0.00271787	9.66834	0.255336	123.01	13.2499	0.55971	298.027	198.402	1355.35	627.855	137.852	22.4813	123.784	120.198	92.2104	143.365	18.2821	6.62397	82.9118	335.999	31.0202
AB08-11	1800.42	18.0042	2.62939		1.25567	37	0.105335	0.00079276	8.22905	0.182927	73.2156	17.3076	0.179845	167.18	87.5659	875.522	321.493	74.5087	11.4152	53.7865	73.1347	60.105	101.936	15.3082	3.25801	45.1528	141.806	17.4227
AB08-11	1800.97	18.0097	2.63489		1.34936	37	0.0838594	0.00258807	9.48583	0.152128	41.8898	13.9393	0.259398	114.481	50.3279	737.924	208.11	51.5771	7.61364	38.027	61.9997	54.55	82.5249	14.8458	1.93684	26.4895	99.0636	10.2917
AB08-11	1801.52	18.0152	2.64039		1.43556	37	0.100173	0.00076905	8.032	0.118052	53.4272	13.8789	-0.0377372	61.0301	51.2342	226.887	110.697	28.5867	6.21548	25.5633	43.8107	45.0024	84.6655	12.1613	1.18633	14.3316	52.422	6.61927
AB08-11	1802.07	18.0207	2.64589		1.28621	37	0.0387527	7.21764e-05	9.0204	0.0974672	47.2109	13.9787	0.174756	33.8819	28.8311	123.78	73.606	15.2311	3.25634	15.8616	33.6689	42.5575	74.3792	11.5881	0.784064	8.81793	28.6422	3.57188
AB08-11	1802.62	18.0262	2.65139		1.23224	37	0.0141031	-0.000301085	7.50478	0.115779	27.1392	13.299	0.165167	29.016	19.2027	76.3121	60.4193	6.9511	2.02894	10.8975	31.0426	42.1885	64.3497	10.7797	0.604635	6.67261	18.1666	2.65311
AB08-11	1803.17	18.0317	2.65689		1.28963	37	0.0521982	0.000561187	7.97803	0.0951076	29.4699	14.0918	0.0348663	31.5079	14.1091	174.99	28.8699	7.37792	2.51573	8.87091	31.1714	40.5768	74.7468	10.6634	0.434379	8.04758	17.278	1.77519
AB08-11	1803.72	18.0372	2.66239		1.34063	37	0.0153179	-0.000842852	8.18551	0.117652	46.22	14.7254	0.107134	37.569	7.75551	37.3515	25.3264	10.6131	1.5559	7.53804	30.3326	35.2827	68.8337	10.4901	0.434479	3.84054	12.1878	1.84729
AB08-11	1804.27	18.0427	2.66789		1.27893	37	0.0338762	-0.000141735	6.72974	0.108499	70.8307	13.6527	0.230007	22.2401	9.49432	35.1088	37.4523	5.81161	1.19756	6.61884	28.5826	30.1711	56.1392	9.40589	0.363255	4.85313	12.6508	1.36208
AB08-11	1804.82	18.0482	2.67339		1.35318	37	0.0236236	-0.000774404	8.18956	0.12004	53.0219	15.1076	0.331474	13.3728	6.35986	35.6895	19.6178	5.46116	0.838123	8.01878	30.6555	34.8383	61.1223	9.40499	0.368815	3.38275	11.491	2.65691
AB08-11	1805.37	18.0537	2.67889		1.34637	37	0.0129156	-0.00012962	8.69432	0.121313	70.2671	14.741	0.109808	6.13271	5.90885	70.385	26.0329	3.46383	0.999663	7.27066	27.2359	33.1998	58.5068	10.2599	0.217544	3.31965	9.50947	2.03964
AB08-11	1805.92	18.0592	2.6844		1.3687	37	0.0446809	0.000135867	7.82598	0.116382	61.5602	14.779	0.33442	18.3404	7.27767	32.9529	15.6045	5.42185	1.42194	5.48809	32.8696	33.7258	57.5125	9.44031	0.410334	1.9648	10.5689	0.875772
AB08-11	1806.47	18.0647	2.6899		1.34026	37	0.0512061	0.000937004	8.19942	0.113427	65.4094	13.8579	0.252434	8.35605	8.8739	82.0723	18.2124	4.75565	0.731948	6.22387	30.3317	41.4038	65.8612	10.7929	0.287212	4.92438	15.4773	1.96036
AB08-11	1807.02	18.0702	2.6954		1.40066	37	0.0201218	0.00200919	8.49827	0.122764	40.9347	15.7576	0.617411	10.7985	9.2993	25.8062	23.8329	5.63255	1.83736	5.80205	30.9317	36.7885	85.9797	10.8731	0.586876	2.186	15.075	0.962208
AB08-11	1807.57	18.0757	2.7009		1.32877	37	0.0622392	0.00418475	7.54015	0.119038	41.2769	14.9378	0.311865	24.6013	8.02313	81.11	17.4111	3.82726	1.69174	7.68707	26.5795	36.8221	72.4941	11.3065	0.275674	19.9136	12.4668	1.40049
AB08-11	1808.12	18.0812	2.7064		1.41864	37	0.0274297	0.00407042	7.53185	0.108441	48.5947	14.393	0.614607	20.9087	8.80602	59.8952	22.3448	7.3996	2.18727	6.07283	29.2832	42.2853	85.1646	13.4546	0.509933	4.1188	11.7231	1.95958
AB08-11	1808.67	18.0867	2.7119		1.36691	37	0.0364484	0.00266781	7.72634	0.114043	47.8522	13.8126	0.305741	7.90389	6.95643	32.6154	14.1296	4.47498	0.730904	6.69564	24.9933	39.2852	84.8706	14.3689	0.270261	11.13	16.9999	1.23833
AB08-11	1809.22	18.0922	2.7174		1.36054	37	0.0252247	0.00200416	7.58693	0.101795	56.355	14.097	0.520779	17.6127	7.16027	28.9158	11.279	3.82873	1.219	7.83271	35.2826	42.4759	92.116	15.7007	0.168754	3.69912	10.5924	1.81362
AB08-11	1809.77	18.0977	2.7229		1.46131	37	0.0507867	0.00243255	7.38374	0.0970206	51.8703	13.9421	0.38825	15.9598	7.72624	30.4288	20.7032	8.98329	0.999581	2.16022	30.2783	46.5949	97.0499	16.3887	0.2443	2.65043	7.24604	1.32065
AB08-11	1810.32	18.1032	2.7284		1.28788	37	0.0177235	0.000760772	8.00692	0.109466	73.483	12.8229	0.381143	7.5542	4.99062	89.9497	14.0533	4.39737	1.58303	3.40353	30.9904	46.1394	100.067	17.4195	0.382364	1.5096	7.65382	1.22785
AB08-11	1810.87	18.1087	2.7339		1.32081	37	0.0352327	0.0022311	7.84446	0.12226	64.2917	13.1804	0.179956	18.5613	10.0335	25.249	11.9656	6.29312	0.776772	3.25158	28.0705	50.5981	111.466	20.9159	0.472997	1.57405	7.05233	1.78117
AB08-11	1811.42	18.1142	2.7394		1.30458	37	0.0470492	0.00204705	6.94708	0.0931501	86.2225	14.4006	0.467327	15.5529	15.4241	20.626	13.7056	3.79596	0.594298	5.74655	30.1666	57.3359	123.238	20.8598	0.581262	3.16453	7.44233	0.703923
AB08-11	1811.97	18.1197	2.7449		1.25198	37	0.0154944	0.00396381	7.65	0.102094	86.4463	13.2918	1.28586	17.2706	12.8454	37.9753	12.8785	5.30193	0.831538	3.40614	34.4536	54.006	119.752	22.2097	0.703608	1.96088	7.30961	0.851042
AB08-11	1812.53	18.1253	2.75041		1.2552	37	0.0122306	0.00536456	6.69081	0.108864	94.3544	13.5676	0.494385	7.41785	17.8372	66.8933	10.7074	3.24565	0.891787	6.48607	32.6342	59.8014	120.13	21.4999	0.600472	2.65609	17.3758	0.612546
AB08-11	1813.08	18.1308	2.75591		1.35665	37	0.0187828	0.00601985	7.48193	0.145056	103.127	13.9216	1.37712	7.55348	26.122	22.8938	12.8012	2.72315	0.975902	5.05487	36.7526	60.2664	126.442	22.5765	1.07718	2.84155	12.0838	1.59734
AB08-11	1813.62	18.1363	2.76141		1.33909	37	0.0134648	0.00627304	7.84003	0.0947848	88.9279	14.2907	0.882396	26.4441	26.124	46.0162	67.8871	5.38716	0.429847	10.2746	38.1349	64.454	127.905	22.9685	0.859857	1.9924	12.6025	2.85394
AB08-11	1814.17	18.1418	2.76691		1.32885	37	0.0504935	0.00559064	7.6385	0.125155	93.1482	14.8119	1.1325	4.95732	30.0895	75.855	19.9186	2.04277	0.670828	4.0311	36.5101	65.5764	138.474	24.0162	2.08954	3.21095	14.0785	1.43635
AB08-11	1814.72	18.1473	2.77241		1.39739	37	0.0482618	0.00519194	7.38715	0.117012	80.8326	13.5884	1.0741	15.6769	96.0594	18.0002	5.61243	3.48964	1.10789	5.53018	39.5923	59.0169	133.677	22.3947	5.3963	0.929397	14.5592	2.32143
AB08-11	1815.28	18.1528	2.77791		1.36329	37	0.0865262	0.00261226	7.88914	0.160505	76.8317	14.443	0.689259	7.33012	262.671	11.8245	19.5748	1.43076	0.913692	5.19803	39.3064	63.9845	144.438	23.5819	9.04587	2.18303	8.03584	3.43719
AB08-11	1815.83	18.1583	2.78341		1.42807	37	0.0393731	0.000800956	7.92089	0.125538	110.833	15.5522	0.568428	13.6925	311.659	13.1671	8.50497	4.89469	1.14273	3.87498	45.3312	68.7576	148.054	26.8175	7.42805	1.79005	11.0054	3.74228
AB08-11	1816.38	18.1638	2.78891		1.23415	37	0.00924097	0.000819552	7.07617	0.0951875	87.0739	13.6336	0.100162	9.12877	220.472	33.0567	8.51103	1.96623	0.431674	4.96973	35.3019	65.4672	137.124	23.6294	5.74006	1.84166	3.69962	1.59336
AB08-11	1816.92	18.1693	2.79441		1.3966	37	0.0166614	0.000695856	7.31628	0.10228	97.4835	14.2873	0.248511	18.9168	179.727	42.8267	32.3793	4.68175	1.00724	4.22512	37.1024	69.4228	152.808	26.257	4.48943	1.68144	4.03818	1.36599
AB08-11	1817.47	18.1748	2.79991		1.41351	37	0.0677162	0.000360573	8.34108	0.141169	94.2015	14.5098	0.179299	15.7989	118.973	12.454	9.2441	1.33656	0.617707	7.38601	38.9611	69.0909	148.503	27.0443	2.61841	1.4348	9.96709	0.919105
AB08-11	1818.03	18.1803	2.80541		1.32174	37	0.0331947	0.000876964	8.02893	0.14095	115.53	14.9804	0.396337	3.2044	94.0924	35.5333	9.17967	2.61473	0.551272	3.83565	42.8554	74.1956	149.917	26.6705	1.62041	2.97289	7.49607	1.59793
AB08-11	1818.58	18.1858	2.81091		1.33087	37	0.0157515	-0.000465824	7.4605	0.113783	84.8649	13.1636	0.100018	13.9047	49.1871	19.002	3.90245	1.56621	0.32682	5.10093	33.7595	60.0282	140.398	23.8366	1.0972	3.33607	3.69432	1.35799
AB08-11	1819.12	18.1913	2.81641		1.27868	37	0.0138176	0.00152735	7.12066	0.101102	84.365	13.3961	0.386723	14.6235	27.0706	65.0477	13.6223	3.54805	0.537899	3.45336	35.8496	64.7175	129.077	24.2933	0.713363	4.85725	5.86234	1.17619
AB08-11	1819.68	18.1968	2.82192		1.28346	37	0.0457236	0.00264447	7.28057	0.0816318	90.706	13.5553	0.176834	20.7693	18.4693	25.761	8.40273	3.91841	0.741287	2.75704	32.2165	60.3902	122.186	22.4265	1.19501	2.07342	2.79327	1.57448
AB08-11	1820.23	18.2023	2.82742		1.28667	37	0.0147604	0.00219831	7.00711	0.0899717	71.4491	13.2903	-0.0360243	24.7472	13.5368	14.2323	9.7494	1.86255	1.5423	2.98066	26.8737	51.593	118.317	18.9388	0.240211	0.160537	6.04188	0.370584
AB08-11	1820.78	18.2078	2.83292		1.13026	37	0.014053	0.00359274	6.6294	0.0785589	50.6061	12.8949	0.16458	12.7864	10.001	19.4388	8.21891	1.7733	0.526026	3.78931	26.8788	46.7175	96.0084	16.7834	0.330642	1.07192	3.75157	1.23632
AB08-11	1821.33	18.2133	2.83842		1.21055	37	0.0132255	0.00120053	6.8228	0.0775463	36.9046	13.2902	-0.035923	35.4301	6.65001	33.7586	8.39964	1.69379	0.679691	3.68412	27.4297	47.4741	98.2135	18.2095	0.239536	2.79126	3.54822	0.506632
AB08-11	1821.88	18.2188	2.84392		1.2349	37	0.0320943	0.00220664	7.75168	0.076018	70.6402	13.8213	0.0337325	9.86495	7.06646	23.3828	40.9669	2.44575	0.576196	3.85181	27.9754	49.8546	96.1979	19.1241	0.241121	3.58559	1.91041	1.37246
AB08-11	1822.43	18.2243	2.84942		1.26926	37	0.0278971	0.002905	7.80604	0.0765358	68.1649	13.4069	0.1048	12.8681	4.50942	21.2293	6.21416	3.30584	0.3206	3.17079	30.3148	53.3194	116.271	20.7175	0.0264605	1.73094	3.25683	1.074
AB08-11	1822.98	18.2298	2.85492		1.23118	37	-0.000562346	0.000205284	6.80095	0.0878207	84.7717	12.8838	0.101151	13.3643	4.65533	4.10722	2.03285	2.06597	0.646765	2.22107	34.1417	55.1728	124.445	21.3586	0.200392	0.409525	3.3305	0.935582
AB08-11	1823.53	18.2353	2.86042		1.3787	37	0.0611395	0.000711995	6.52897	0.0958074	100.609	13.2474	0.10012	9.08437	6.34764	9.72698	9.9965	1.01115	0.389757	3.99843	32.9147	59.7667	131.212	23.466	0.163736	1.4664	0.950492	1.12604
AB08-11	1824.08	18.2408	2.86592		1.40585	37	0.0119295	-0.000965679	7.35853	0.0988008	113.104	15.2627	0.253857	17.2179	6.65761	10.4023	9.18319	1.34897	0.691023	2.52251	33.3478	67.5756	156.096	26.1231	0.0646503	1.71761	0.393047	0.675787
AB08-11	1824.63	18.2463	2.87142		1.34343	37	0.0368936	1.67943e-05	7.90898	0.100296	120.505	14.4464	-0.0372129	12.9212	4.397	7.29701	4.44907	2.34751	0.837461	3.22649	38.0536	71.2816	144.514	27.0977	0.100662	0.431752	4.36625	0.347309
AB08-11	1825.18	18.2518	2.87692		1.37574	37	0.0374671	-0.000210204	8.91968	0.122073	138.682	13.8374	0.10608	1.88109	5.26343	6.49695	7.5086	4.35727	0.523509	4.82324	43.8133	70.5649	145.015	27.0829	0.173482	3.1408	2.11914	0.380798
AB08-11	1825.73	18.2573	2.88242		1.34263	37	0.0131175	-0.000208187	7.96	0.10882	116.532	14.9664	0.175924	8.38204	6.09458	29.6929	6.30069	1.06106	0.430894	8.99197	36.1994	69.6851	149.561	25.0616	0.244463	0.883827	5.79228	0.30719
AB08-11	1826.28	18.2628	2.88793		1.32394	37	0.0179291	-0.000262576	7.28821	0.121356	114.563	15.6177	0.104266	12.2103	4.54889	9.34961	6.18249	1.71553	0.232037	3.29883	40.6838	65.5982	139.229	26.0713	0.242611	1.39712	5.74838	0.825546
AB08-11	1826.83	18.2683	2.89343		1.24244	37	0.0449389	-0.00022428	6.83629	0.0956582	122.965	13.6859	0.301203	4.91772	3.03294	10.5432	12.8422	2.58866	0.346292	3.8408	35.0247	59.3421	130.363	21.8979	0.162923	1.89385	4.87794	0.25812
AB08-11	1827.38	18.2738	2.89893		1.34907	37	0.0158314	-0.000688148	7.94007	0.140681	144.372	14.1946	0.318647	6.39917	5.86123	7.77899	6.89023	1.56665	0.234544	3.91748	34.2785	60.4041	124.652	21.3309	0.0994841	1.67502	1.61779	0.553767
AB08-11	1827.93	18.2793	2.90443		1.33207	37	0.0103542	-0.000963662	7.25686	0.104552	109.906	12.9339	0.157069	5.12467	5.44138	15.8536	6.57615	1.02184	0.228301	4.00554	33.7196	51.7685	108.342	18.3893	0.0885432	0.26282	1.5269	0.430409
AB08-11	1828.48	18.2848	2.90993		1.43272	37	0.0289074	-0.00117662	8.10044	0.1446	126.142	17.5914	0.0363377	13.4351	5.93996	33.6251	7.22254	2.01401	0.574163	2.75991	32.2902	62.7568	126.833	21.3954	0.491303	0.939072	10.2872	0.883846
AB08-11	1829.03	18.2903	2.91543		1.48639	37	0.0188418	-0.000461512	8.2295	0.143149	119.471	15.1481	0.187421	9.02057	17.4946	29.6527	8.90577	1.9305	0.575701	6.48227	38.1718	66.455	128.391	22.5923	0.183047	1.01136	0.786582	0.0664231
AB08-11	1829.58	18.2958	2.92093		1.23808	37	0.00346269	0.000124113	7.82774	0.0993416	122.61	13.5005	0.30549	8.14314	4.65028	4.94907	5.64989	4.79232	0.393341	4.0352	35.4346	60.0564	123.809	21.612	0.130309	1.73184	1.4887	0.800012
AB08-11	1830.13	18.3013	2.92643		1.37952	37	0.000547369	-0.000288031	7.82361	0.105069	119.007	15.3453	0.0336616	5.94334	5.5025	13.6371	6.97012	1.94782	0.488771	2.41365	38.0799	62.5953	126.71	23.4322	0.169113	2.03027	1.17296	0.164647
AB08-11	1830.68	18.3068	2.93193		1.26912	37	0.0169408	-0.00111762	7.60074	0.100424	140.098	13.904	0.0320699	3.34483	4.41616	13.7297	2.84536	2.9512	0.445124	3.66197	35.5014	60.6505	134.191	22.7991	0.263298	2.54843	1.05676	0.616045
AB08-11	1831.23	18.3123	2.93743		1.37167	37	0.0501354	-0.000659904	7.41855	0.100568	105.673	13.2519	0.424539	7.43119	8.25075	15.5669	8.11925	1.28908	0.49941	3.60908	29.9607	62.0252	141.397	23.1507	0.158789	0.695752	1.10135	0.380872
AB08-11	1831.78	18.3178	2.94293		1.29311	37	-0.0034077	-0.000142672	7.0054	0.112131	110.354	13.6441	0.165048	1.38826	6.42627	13.7953	3.9124	1.46518	0.301532	3.52745	35.086	69.6946	148.035	25.5537	0.161195	0.644847	1.90829	0.616347
AB08-11	1832.33	18.3233	2.94843		1.38429	37	0.0112914	-0.00108685	7.53034	0.12974	126.172	14.831	0.319858	2.86278	11.209	3.28343	7.70277	0.900389	0.522095	4.37129	41.6515	79.6437	167.388	30.0136	0.355891	2.01115	2.43951	0.591093
AB08-11	1832.88	18.3288	2.95393		1.1653	37	0.0119566	-0.000551598	7.08679	0.0978876	91.2648	12.99	0.147491	10.9585	5.32061	6.5013	5.22285	1.79905	0.361252	2.42135	31.431	64.2668	140.413	25.0468	0.144048	0.521343	1.43379	1.89999
AB08-11	1833.43	18.3343	2.95944		1.34969	37	0.00635367	-0.000137468	7.29676	0.11834	80.5825	15.1547	0.0949713	10.4281	6.59007	5.21986	3.38466	2.69408	0.310328	4.58085	32.7226	61.5853	146.591	27.1206	0.18815	1.27258	0.374675	0.593865
AB08-11	1833.98	18.3398	2.96494		1.33449	37	0.0250368	-6.6197e-05	7.9673	0.119208	96.5066	13.8396	0.10242	10.1658	6.18672	10.9926	7.11115	2.01055	0.569492	2.95715	37.3562	70.2417	161.339	26.6537	0.273725	0.286967	1.63562	1.45879
AB08-11	1834.53	18.3453	2.97044		1.18671	37	0.0336365	-0.000808961	7.44873	0.101258	78.2112	14.6448	0.0303785	3.31975	13.4674	6.30173	2.63224	1.6096	0.499455	3.72696	32.0727	62.5601	140.159	23.427	0.281676	2.41402	1.54787	0.366072
AB08-11	1835.08	18.3508	2.97594		1.35981	37	0.00697922	-0.000234858	8.80529	0.150914	68.9408	14.9657	0.174684	7.51908	7.55195	10.7907	2.8015	1.63359	0.362625	4.02196	37.5013	72.2179	137.029	24.9537	0.206674	0.942634	1.15116	1.59007
AB08-11	1835.63	18.3563	2.98144		1.47053	37	0.0420795	-0.000870825	8.24802	0.123546	84.1322	13.9288	0.179262	7.3685	15.5781	9.05508	1.78983	2.44167	0.550638	2.94293	40.8322	64.8717	137.755	23.6841	0.360137	3.70426	1.61032	0.241736
AB08-11	1836.18	18.3618	2.98694		1.32586	37	0.00692244	1.62955e-05	7.81755	0.114992	87.7961	14.2056	0.103473	2.04459	11.7689	13.3357	3.1283	0.880644	0.76945	1.69968	37.9225	59.7037	139.298	22.4155	0.0976723	1.451	0.408215	0.336992
AB08-11	1836.73	18.3673	2.99244		1.4323	37	0.0194019	7.19606e-05	7.83912	0.10367	69.8469	14.9273	0.104052	1.38117	30.1186	6.37278	4.97387	1.95995	0.340001	3.72377	36.6731	62.0473	125.438	20.3077	2.54443	0.810468	3.32982	2.79875
AB08-11	1837.28	18.3728	2.99794		1.26605	37	0.031509	-0.000441498	7.36164	0.0925968	59.1111	14.1625	0.236214	6.92152	209.454	24.7415	6.37054	0.456504	0.412435	4.29419	35.3546	59.3178	118.938	19.7695	14.4592	0.783276	1.32665	3.81032
AB08-11	1837.83	18.3783	3.00344		1.18631	37	0.00387867	-0.000959211	6.67578	0.0930256	67.5392	13.195	0.219318	2.79151	753.835	15.0252	2.50736	0.498011	0.207786	2.30844	37.8252	54.2939	108.859	19.1222	35.407	0.145195	1.43322	6.617
AB08-11	1838.38	18.3838	3.00894		1.35056	37	0.0254001	-0.000900704	9.624	0.108304	61.0772	14.3277	0.103906	12.2946	1557.85	41.1561	4.61582	0.884329	0.361181	3.71854	40.6345	65.7066	132.467	23.841	56.4733	0.744554	3.29312	9.02562
AB08-11	1838.93	18.3893	3.01444		1.43946	37	0.00178919	0.000699258	8.43111	0.118416	81.3123	15.5812	0.185554	16.4848	1833.89	7.44967	3.20045	0.591056	0.546868	3.35272	42.849	76.2835	142.81	26.0449	52.8512	1.62301	1.97459	8.03774
AB08-11	1839.48	18.3948	3.01994		1.32769	37	0.0045998	-0.000447188	7.30446	0.100482	92.7927	13.9806	0.101857	3.16918	1425.29	2.18664	7.07208	1.2714	0.226677	2.80004	38.4926	68.2816	138.739	23.4937	33.4745	0.475883	1.31235	7.04871
AB08-11	1840.03	18.4003	3.02545		1.32336	37	0.0074858	-0.00103734	7.48869	0.118521	98.3105	13.743	-0.0352354	2.28213	1025.72	0.537438	2.57513	2.06236	0.435172	2.91539	37.5384	64.8926	135.333	24.186	25.2122	0.471755	2.14164	4.90201
AB08-11	1840.58	18.4058	3.03095		1.40374	37	0.0105777	-0.000912029	8.02667	0.0899541	107.861	13.7384	0.0991062	7.06282	672.326	9.0647	27.3155	1.23706	0.323839	3.82088	36.409	63.0541	142.261	24.2165	15.6219	0.833725	2.56026	2.897
AB08-11	1841.13	18.4113	3.03645		1.45213	37	0.0194804	-0.00054897	7.55541	0.114082	133.577	15.8221	0.0327381	7.20798	393.075	6.37002	6.91482	2.2139	0.4544	5.2682	35.0936	67.8723	135.89	24.3541	10.2506	1.15953	1.17178	2.13592
AB08-11	1841.68	18.4168	3.04195		1.32	37	0.0296801	-0.000425024	8.01855	0.1027	145.51	13.7713	0.103079	9.26927	247.236	8.07105	1.23578	0.386062	0.29385	3.54638	33.4357	63.8562	148.883	24.1029	5.40795	0.353072	1.23277	1.22795
AB08-11	1842.23	18.4223	3.04745		1.46268	37	0.0171414	4.41785e-05	8.47257	0.113254	102.403	13.4762	0.384818	2.01407	141.872	1.17603	8.20971	2.04282	0.188207	3.72418	34.8505	63.595	141.331	23.3301	3.44451	0.486192	1.88641	0.616076
AB08-11	1842.78	18.4278	3.05295		1.3844	37	0.0271816	-0.000531826	8.29758	0.124988	174.98	14.8445	0.107997	3.71044	86.7498	20.3885	4.50567	0.661817	0.330382	3.56625	36.0732	62.8007	140.572	24.1054	2.00616	1.85108	1.45804	0.747228
AB08-11	1843.33	18.4333	3.05845		1.37942	37	0.019705	0.000182707	8.45137	0.118273	121.465	15.2621	0.103667	1.92235	47.2451	11.0954	2.22352	0.964632	0.338742	5.57373	37.0833	67.5579	130.93	22.4235	1.45979	1.58297	6.22696	0.510188
AB08-11	1843.88	18.4388	3.06395		1.40358	37	0.00515944	-0.00111493	7.89001	0.106085	123.937	15.8129	0.105777	3.7199	36.7749	18.036	5.9147	0.0601099	0.720439	4.37061	34.9606	61.305	124.688	21.3623	1.41636	0.362313	3.71138	0.696647
AB08-11	1844.43	18.4443	3.06945		2.15384	37	0.0452007	-0.000620711	9.23582	0.125265	125.634	14.6458	0.243194	1.45821	25.6204	4.8545	3.06016	1.21008	0.510941	3.13247	35.5819	54.3401	111.176	19.2883	1.13576	0.548254	4.68612	1.16443
AB08-11	1844.98	18.4498	3.07495		1.14261	37	0.0175072	0.000103288	7.43828	0.0876455	81.869	12.9834	0.0840868	0.195835	27.1147	4.69703	6.06553	0.982797	0.397447	2.77668	23.1427	38.6693	89.0453	13.2911	1.12593	0.497697	4.84349	0.357838
AB08-11	1845.53	18.4553	3.08045		1.48802	37	0.00169215	-0.000460119	7.8733	0.0982235	102.038	15.7721	0.17549	4.40829	26.6258	4.16152	3.73503	1.97409	0.342453	4.91011	32.0634	52.3768	108.389	17.1504	0.859823	1.27365	4.61437	0.480887
AB08-11	1846.08	18.4608	3.08595		1.40174	37	0.0210252	-0.000151433	8.14959	0.0925505	99.6798	13.9477	0.175183	1.55833	21.3084	1.93319	3.86988	1.80444	0.407272	2.44192	28.7938	47.1021	98.88	16.3191	1.11151	1.46708	4.76753	0.689025
AB08-11	1846.63	18.4663	3.09146		1.59186	37	0.0245698	-0.00123151	7.79662	0.120644	86.4442	14.405	0.474659	0.780895	19.6365	15.6815	3.72217	0.751476	0.354724	3.58477	27.4024	50.7616	95.4055	17.1235	0.590382	0.777889	5.65041	0.425836
AB08-11	1847.18	18.4718	3.09696		1.42165	37	0.0200456	0.000735638	8.06838	0.0989424	79.7389	16.7405	0.0364079	10.2842	19.6944	7.3853	2.92795	1.7514	0.342152	2.14654	29.0162	50.3552	102.721	19.0004	0.956265	1.35923	5.0968	1.22067
AB08-11	1847.73	18.4773	3.10246		1.36515	37	0.00891269	-0.00106676	8.84764	0.109488	90.654	14.7062	0.109531	3.89634	17.6455	5.92188	5.23576	1.1062	0.768841	4.2228	29.9537	51.3571	99.9455	16.3782	0.595673	0.853143	3.84312	0.174396
AB08-11	1848.28	18.4828	3.10796		1.23436	37	0.00694342	-0.000233653	7.91866	0.0901093	86.9808	13.9346	0.313792	4.36555	12.6133	3.74888	3.13778	1.04818	0.252603	2.13542	26.6527	45.1252	91.4177	15.6783	0.52855	0.549597	3.06539	0.268908
AB08-11	1848.83	18.4883	3.11346		1.30726	37	0.00529931	-0.000941776	8.12708	0.120739	117.109	13.3809	0.0353661	1.17788	40.9677	2.52719	5.70798	0.752072	0.173846	3.13686	28.6628	44.5822	92.9015	15.5562	6.22616	0.304407	4.64955	1.72829
AB08-11	1849.38	18.4938	3.11896		1.36642	37	0.0152257	-0.000612256	9.00053	0.0933317	108.038	14.9557	0.263471	2.26181	562.149	14.053	2.4058	0.776445	1.06787	4.7897	30.9698	47.3252	103.459	17.9502	61.2344	0.803735	7.36044	14.7159
AB08-11	1849.93	18.4993	3.12446		1.22468	37	0.0169513	0.000996559	6.78854	0.102199	76.865	13.0113	0.356954	7.77948	4889.98	5.62313	9.18131	3.81161	0.999484	9.06257	36.1395	51.4712	102.412	19.3678	341.322	3.64089	24.0435	58.9494
AB08-11	1850.48	18.5048	3.12996		1.21063	37	0.0140369	0.00500492	6.63856	0.0805149	74.8371	11.8822	0.616036	2.0752	19346.8	22.6387	9.34714	5.86332	1.39269	16.3763	37.5924	63.5165	138.291	26.6875	826.528	5.62256	46.8315	119.445
AB08-11	1851.03	18.5103	3.13546		1.31518	37	0.0365348	0.0123262	7.59095	0.0970624	70.1474	13.6159	0.629293	6.1735	43003.6	11.0314	12.085	8.49669	1.69574	18.6304	59.8213	92.5954	204.133	40.1184	1485.67	9.96996	77.7491	187.742
AB08-11	1851.58	18.5158	3.14096		1.28344	37	0.0347153	0.0239708	6.86742	0.0774163	46.9918	12.3743	1.57285	2.92876	62631.2	15.9212	12.8013	9.44327	3.01571	26.361	76.5251	112.621	253.15	48.6378	1911.57	12.2931	100.268	239.159
AB08-11	1852.13	18.5213	3.14646		1.20925	37	0.0548638	0.0341833	6.82519	0.0918213	68.9056	12.0335	1.21041	9.73044	85683.9	26.5788	17.0494	12.8603	3.56679	41.5994	86.6847	133.327	312.005	61.3221	2680.67	13.7316	126.108	317.971
AB08-11	1852.68	18.5268	3.15196		1.12847	37	0.0583945	0.0316721	6.64248	0.0601515	67.5832	11.1766	1.58856	3.26614	95608.1	17.1813	14.0267	9.98924	2.6407	33.1266	75.401	124.95	297.969	62.8385	2592.58	12.3885	111.261	290.89
AB08-11	1853.23	18.5323	3.15746		1.25871	37	0.0557704	0.0333097	6.30731	0.0778882	42.268	12.3874	1.83881	2.57708	100243	19.3729	10.6264	9.70763	2.54669	23.0533	82.769	133.245	325.537	64.984	2502.63	13.7712	108.09	286.432
AB08-11	1853.78	18.5378	3.16297		1.41836	37	0.0591242	0.0360084	6.29051	0.0970631	40.1769	12.8359	2.26737	1.82108	84626.6	13.8416	8.87118	5.24041	2.08612	23.5942	69.5133	118.208	282.044	57.5879	1957.32	7.48096	74.5244	203.273
AB08-11	1854.33	18.5433	3.16847		1.38118	37	0.0243194	0.0600862	7.17713	0.0883371	69.8862	12.1919	2.79926	2.64953	59772.6	9.71462	5.38621	4.12961	1.66005	12.8874	50.8942	103.095	252.872	47.1778	1309.71	4.6977	45.5638	134.821
AB08-11	1854.88	18.5488	3.17397		1.37755	37	0.036342	0.0731671	7.7898	0.0971466	71.8851	12.9353	3.77387	3.46415	40364.8	9.67496	6.72814	2.78016	0.875883	9.32686	51.3829	89.4263	201.375	38.4646	778.633	3.86595	29.9798	86.1225
AB08-11	1855.43	18.5543	3.17947		1.3974	37	0.0261543	0.0854682	7.36602	0.101533	76.2024	13.8934	3.7953	4.06858	24794.2	4.43188	4.62672	2.19266	0.616129	5.3554	42.538	90.0118	177.466	32.8475	480.611	3.07332	21.1767	48.5468
AB08-11	1855.98	18.5598	3.18497		1.50049	37	0.0255562	0.092708	7.89264	0.114095	62.3758	13.7486	3.04058	2.69944	14896.4	12.914	2.99307	1.15598	0.766981	4.23785	39.0769	86.1782	175.793	30.9313	309.731	1.2896	13.3823	30.0356
AB08-11	1856.53	18.5653	3.19047		1.46898	37	0.0079986	0.0778726	6.77674	0.092449	100.826	12.8383	2.88288	29.2753	8524.86	6.49076	2.90541	1.46119	0.567058	3.7897	34.041	70.2007	155.041	27.1326	169.929	1.92993	9.14983	17.6178
AB08-11	1857.08	18.5708	3.19597		1.67322	37	0.0136739	0.0657351	8.61293	0.108039	88.3501	14.2089	3.21197	4.69544	4979.66	3.43179	3.45908	1.541	0.449171	3.46502	33.8901	68.1273	156.23	26.6407	101.608	0.853044	6.40966	10.8272
AB08-11	1857.63	18.5763	3.20147		1.73072	37	0.00481392	0.0462976	8.03098	0.114615	111.562	15.5735	2.83875	1.97672	2627.31	8.8887	2.21438	1.33058	0.303885	5.14169	32.3318	63.7718	143.19	24.1203	55.2757	0.697397	4.46345	5.81426
AB08-11	1858.18	18.5818	3.20697		1.69309	37	0.0182118	0.0320697	7.12093	0.0877794	68.8868	14.3634	1.32028	2.0498	1485.16	3.60364	1.62754	0.985501	0.25777	3.20437	33.889	60.0184	122.957	21.5979	34.3662	0.626863	6.39465	4.75378
AB08-11	1858.73	18.5873	3.21247		1.43506	37	0.025766	0.021233	7.23083	0.0912887	75.0834	13.3832	1.10614	0.715725	646.496	2.67137	1.46179	0.688762	0.325121	3.0104	31.4006	50.5583	102.903	18.2644	20.6076	0.650943	3.36811	3.4716
AB08-11	1859.28	18.5928	3.21797		1.63325	37	0.0041995	0.0123389	7.47587	0.0920876	62.5826	14.0973	0.9193	2.32577	684.408	3.13751	2.3049	1.34213	0.203902	3.33821	23.1231	47.4648	102.75	17.5388	14.8503	1.03949	3.57816	2.95504
AB08-11	1859.83	18.5983	3.22347		1.48358	37	0.0251892	0.00817281	7.31427	0.0764889	46.9914	13.7199	0.580949	2.62423	334.479	4.33583	3.27571	1.42874	0.310629	2.51048	26.7887	46.8919	97.8795	17.2833	13.5461	0.474403	3.34334	1.27724
AB08-11	1860.38	18.6038	3.22898		1.17594	37	0.0115125	0.00464452	5.7475	0.0739149	43.6673	11.5244	0.599637	0.67883	181.175	3.49469	2.50677	0.721812	0.188741	2.6833	22.0027	36.9291	88.6361	14.9926	5.82822	0.554853	2.26938	1.29268
AB08-11	1860.93	18.6093	3.23448		1.50375	37	0.0283333	0.00479451	8.0345	0.0928973	35.4574	14.1534	0.671634	1.26619	245.364	1.97183	7.92968	1.39417	0.299359	2.59629	30.1919	47.7516	112.555	19.3223	6.27211	0.817937	3.03682	2.71966
AB08-11	1861.48	18.6148	3.23998		1.5141	37	0.0114907	0.00428125	7.44522	0.09984	89.1061	15.367	0.83381	2.52055	135.272	7.46337	1.8727	0.574244	0.149833	2.95958	37.0005	56.5764	117.42	21.1299	3.78691	0.570114	3.37893	1.06748
AB08-11	1862.03	18.6203	3.24548		1.58059	37	0.00729679	0.00465849	7.92632	0.0972052	82.3052	15.637	0.697583	0.563504	134.606	4.10269	1.45499	0.841638	0.333659	3.45078	33.8464	59.8429	131.809	22.4929	6.28819	0.577567	3.01968	0.682017
AB08-11	1862.58	18.6258	3.25098		1.45749	37	0.0150555	0.00645552	7.42265	0.089325	77.7214	13.3571	0.573431	1.00536	371.832	4.0697	1.87883	0.773409	0.30661	2.89382	31.367	55.508	122.812	21.0756	7.02621	0.593227	5.03108	1.76156
AB08-11	1863.13	18.6313	3.25648		1.4194	37	0.00546126	0.0107094	7.45264	0.0935797	92.7856	14.7631	1.01818	1.89061	142.859	2.82997	2.09482	0.80433	0.318868	3.29782	34.8161	62.2224	125.037	21.5187	3.48618	0.486986	4.74996	1.38052
AB08-11	1863.68	18.6368	3.26198		1.47631	37	0.011308	0.0176841	7.95801	0.102782	80.471	14.9373	1.07124	3.0565	201.636	1.30492	3.46375	0.672044	0.312629	3.62136	35.7647	59.112	119.825	20.9112	3.4783	1.33275	4.42252	2.87673
AB08-11	1864.23	18.6423	3.26748		1.40217	37	0.00517378	0.0230349	7.45961	0.107076	71.2017	14.5466	1.39383	1.36496	35.5403	5.16373	1.84504	1.07125	0.258162	3.796	32.7302	54.8533	109.805	18.6812	7.39922	0.429444	4.67019	0.310139
AB08-11	1864.78	18.6478	3.27298		1.36991	37	0.013107	0.0253686	8.13325	0.0999022	79.3292	14.6124	1.34771	4.24064	65.836	3.16144	1.4422	1.17771	0.195525	1.77585	30.2292	48.8132	103.142	17.8218	5.44765	0.437701	4.05985	1.14392
AB08-11	1865.33	18.6533	3.27848		1.49809	37	0.0101164	0.0265269	8.13225	0.0825985	67.8815	14.4629	1.36692	5.50164	266.064	4.81326	3.24099	1.1945	0.404005	2.71101	31.8151	49.1565	100.489	17.188	3.09872	0.580652	4.59125	1.01421
AB08-11	1865.88	18.6588	3.28398		1.33209	37	0.0322491	0.0216041	7.76498	0.0846294	78.7402	15.143	1.21363	3.74472	106.291	1.47081	1.23392	0.630722	0.379217	3.96804	28.4181	37.8666	98.295	14.8272	1.16465	0.545025	3.64299	0.575059
AB08-11	1866.43	18.6643	3.28948		1.40475	37	0.00983741	0.0201451	7.44193	0.0740216	28.2263	13.676	1.04155	5.00369	223.381	6.02016	2.28701	0.568728	0.392862	3.22607	26.4468	45.5371	86.2203	15.594	2.75521	0.631108	4.16848	1.12823
AB08-11	1866.98	18.6698	3.29498		1.40292	37	0.00132776	0.0180292	6.82064	0.0808783	77.7655	14.5433	0.963747	6.47776	40.7899	5.19096	2.84601	1.23867	0.169582	3.79273	26.4719	48.3284	92.8245	17.0763	2.95832	1.08974	2.90148	1.43892
AB08-11	1867.53	18.6753	3.30049		1.40672	37	0.0129039	0.0213968	7.58736	0.0878663	58.1283	16.3533	1.5422	7.97345	26.2743	6.04117	2.57058	0.905857	0.170312	3.95625	27.5195	48.6047	101.755	19.5843	1.2412	1.22714	3.24205	0.913594
AB08-11	1868.08	18.6808	3.30599		1.38465	37	0.016559	0.0260932	8.0733	0.0849551	76.7258	13.844	1.34158	8.80412	82.3649	1.73125	1.36293	1.08688	0.217067	2.51192	32.7362	57.7313	128.458	23.0072	3.33893	0.569888	2.71381	1.53283
AB08-11	1868.63	18.6863	3.31149		1.40924	37	-0.00102316	0.0328784	7.69165	0.0945974	82.6451	14.8788	1.684	5.21137	50.8112	8.72857	2.45697	0.768742	0.386021	2.59207	34.1701	59.0733	137.287	24.6656	4.13656	1.07268	2.3554	0.731393
AB08-11	1869.18	18.6918	3.31699		1.36728	37	-0.00213545	0.0388285	7.17802	0.0808666	91.4064	13.7844	2.25978	5.16703	133.073	3.62104	2.06687	0.736683	0.369923	3.36702	31.5308	60.9937	149.175	26.4703	1.53537	0.696233	2.454	1.58664
AB08-11	1869.73	18.6973	3.32249		1.42399	37	0.0126048	0.0383188	8.14224	0.0962118	76.4029	14.5026	1.91419	2.63928	17.9711	2.90957	1.64684	0.741836	0.23849	3.53878	36.9242	67.1469	155.423	29.3455	4.43638	0.901523	2.80149	0.563084
AB08-11	1870.28	18.7028	3.32799		1.42733	37	0.00717064	0.0321084	8.1207	0.0927067	103.239	13.6775	1.69762	2.42246	233.39	4.54472	1.86439	0.316302	0.260869	2.05707	36.1778	66.8814	166.291	28.0695	4.02949	1.16894	1.77776	1.20548
AB08-11	1870.83	18.7083	3.33349		1.48759	37	0.00296253	0.0322064	8.40752	0.0969401	107.833	14.7838	2.25298	2.29854	206.656	3.36824	1.38778	1.01967	0.312387	3.77009	32.6601	68.3779	161.101	28.3492	3.81657	1.46835	2.18909	1.12301
AB08-11	1871.38	18.7138	3.33899		1.53352	37	0.0120264	0.0234771	7.84636	0.0857015	86.2127	14.1713	2.52469	2.51256	36.6763	2.67464	2.26269	0.562681	0.56459	3.48355	31.9039	68.6126	152.37	26.4476	3.71065	1.87391	2.13994	0.343571
AB08-11	1871.93	18.7193	3.34449		1.62733	37	0.0184289	0.0201831	8.71468	0.0875014	78.0499	15.4002	1.51241	3.76123	109.693	3.20137	2.27414	1.10564	0.243631	2.55527	32.4358	60.9821	137.724	24.5913	6.38736	1.73992	2.25447	4.1481
AB08-11	1872.48	18.7248	3.34999		1.45368	37	0.0137369	0.0154488	7.28954	0.0692538	61.5936	14.4783	1.4663	1.79451	635.416	3.6251	2.30731	0.700521	0.288486	3.06179	27.9415	51.291	111.172	21.1467	25.5836	1.48217	2.42712	4.2724
AB08-11	1873.03	18.7303	3.35549		1.51439	37	0.00479881	0.0132841	7.88107	0.0908672	63.5706	14.5955	1.6114	1.88436	1729.95	4.6646	3.49991	1.24201	0.32508	2.03944	29.2466	52.9021	116.213	20.2857	53.3707	2.08635	3.43337	9.26585
AB08-11	1873.58	18.7358	3.36099		1.60294	37	0.0136018	0.0169588	7.3216	0.086361	51.2027	15.7324	1.1056	5.69835	1699.6	22.3035	13.4333	4.43288	0.897637	6.42444	33.6917	54.9557	108.134	20.7326	53.4313	8.15275	25.8473	7.82079
AB08-11	1874.13	18.7413	3.3665		1.43111	37	0.0141507	0.0225848	7.36121	0.0735794	55.0824	12.6647	1.56754	18.0176	1731.1	61.5593	41.2016	11.3774	2.51023	13.2624	36.5325	50.7992	107.452	18.1782	46.4139	16.1416	46.4104	11.731
AB08-11	1874.68	18.7468	3.372		1.37715	37	0.00508448	0.0392994	6.43106	0.0939267	47.1545	13.5894	2.07285	52.4594	1922.09	202.92	84.4582	23.9931	6.16516	33.8738	62.5531	74.5112	123.909	22.2848	43.2494	29.9508	90.0331	13.4328
AB08-11	1875.23	18.7523	3.3775		1.43211	37	0.0125458	0.0488398	7.64174	0.178247	62.0715	14.9322	3.17999	98.2177	1417.53	346.414	184.4	45.4019	10.0881	47.3185	103.277	99.9962	180.053	28.8553	36.4073	52.8251	137.174	20.7117
AB08-11	1875.78	18.7578	3.383		1.37242	37	0.0280649	0.0632537	8.23419	0.306314	80.6532	15.0022	2.66677	140.356	1107.91	531.33	255.797	66.4753	15.6345	82.6497	109.542	127.107	204.067	30.9602	23.5714	68.8099	209.546	21.4489
AB08-11	1876.33	18.7633	3.3885		1.36513	37	0.0128067	0.0820157	8.67954	0.38269	67.785	14.2305	3.90833	172.608	585.233	560.092	313.602	80.0521	15.1184	78.366	130.955	140.456	235.041	35.8523	19.0077	75.2074	174.194	21.0879
AB08-11	1876.88	18.7688	3.394		1.34261	37	0.00383886	0.0744955	9.2302	0.375622	90.9355	12.8262	2.58555	167.527	474.55	580.419	278.879	58.0791	12.5791	53.4461	112.607	135.208	213.683	34.1976	9.22711	69.4924	151.699	16.8401
AB08-11	1877.43	18.7743	3.3995		1.18583	37	0.0116698	0.0580266	6.41016	0.258154	67.5526	11.7684	1.67808	139.06	288.015	436.349	212.19	44.2213	8.89608	40.6482	87.0235	110.497	177.368	29.1378	6.87927	43.0391	83.098	11.3615
AB08-11	1877.98	18.7798	3.405		1.36422	37	0.0134486	0.0597046	9.1483	0.282409	78.9943	13.8443	2.43465	130.422	436.883	368.541	174.529	38.5717	6.93333	46.4804	83.6122	122.369	228.421	35.0381	5.63677	40.9985	76.5617	12.0939
AB08-11	1878.53	18.7853	3.4105		1.39037	37	0.0173102	0.0501265	7.70537	0.19962	85.5602	14.0173	1.77429	104.928	519.225	227.178	115.301	27.122	5.30165	24.5073	74.1092	102.852	192.185	31.6261	7.56959	28.5242	48.187	7.54326
AB08-11	1879.08	18.7908	3.416		1.26437	37	0.014489	0.0347621	7.85487	0.179125	73.0394	15.0245	1.15582	60.7916	456.835	152.214	89.5891	15.5034	3.85093	16.2325	57.1833	87.9862	158.207	25.3245	11.316	20.3956	29.5942	4.7012
AB08-11	1879.63	18.7963	3.4215		1.37521	37	0.0224035	0.0252836	7.74795	0.124217	54.1007	14.8839	0.995822	48.1118	109.988	118.129	45.5878	10.4133	1.70471	13.4613	45.3245	71.7161	131.471	23.8665	7.79032	11.9844	20.6419	3.45621
AB08-11	1880.18	18.8018	3.427		1.24761	37	0.00884328	0.0229535	7.02672	0.085308	43.0402	14.3754	0.301627	21.5651	189.107	56.9756	18.9974	5.68257	1.15774	7.01945	33.6734	53.5174	106.14	17.3411	5.33747	6.12682	9.50182	1.62023
AB08-11	1880.73	18.8073	3.4325		1.45173	37	0.00410839	0.0101232	7.17525	0.0927239	49.0526	15.154	0.327848	11.5545	89.5166	30.2234	15.0047	3.50666	0.715948	5.23029	34.0311	50.2855	102.916	16.9025	2.53915	3.95481	5.878	2.91665
AB08-11	1881.29	18.8129	3.43801		1.3714	37	0.0143665	0.00621382	7.8763	0.0989252	38.9233	14.7169	0.262673	4.79434	300.991	15.1824	4.66537	4.32682	0.435324	4.46589	29.0111	43.9455	97.6129	16.501	11.4363	1.77726	2.54414	2.18879
AB08-11	1881.84	18.8184	3.44351		1.30788	37	0.00768865	0.00540172	7.73586	0.0805097	35.018	14.1795	0.24361	5.53987	58.3563	7.96514	5.44875	1.04741	0.187567	4.28522	26.8148	43.0911	96.3783	16.3701	2.03408	1.90689	1.46409	1.37358
AB08-11	1882.38	18.8239	3.44901		1.37893	37	0.0128625	0.00297655	7.23727	0.0972185	45.1495	15.0285	0.569422	4.28844	133.866	9.54325	2.26751	1.31871	0.345156	2.32142	29.8652	55.7333	124.06	22.119	1.39374	1.01948	3.1585	2.17083
AB08-11	1882.93	18.8294	3.45451		1.35685	37	0.0241612	0.00239674	8.02504	0.0969519	48.951	14.806	0.173218	1.83438	184.75	4.44811	2.07898	0.387437	0.143966	1.69923	32.4651	63.8168	134.443	24.6761	4.21087	1.45062	3.24665	0.646858
AB08-11	1883.48	18.8349	3.46001		1.38693	37	-0.00202606	0.0026907	7.16546	0.0843502	60.403	13.6407	0.169071	0.971883	38.1947	2.10721	1.07404	0.779141	0.49829	1.93782	33.9921	67.816	144.836	27.8259	3.86571	1.73062	2.63952	0.866676
AB08-11	1884.04	18.8404	3.46551		1.32057	37	0.0773279	0.0039073	7.27447	0.0890487	61.928	14.3078	0.531705	3.66231	73.0898	8.94263	1.83256	0.645615	0.190539	2.60475	34.6352	69.1322	165.229	29.704	4.17925	0.754926	1.42234	1.60579
AB08-11	1884.59	18.8459	3.47101		1.44507	37	0.0203089	0.00785524	7.79877	0.104697	89.543	14.771	0.323035	1.63477	6.51793	16.7139	3.66338	0.909332	0.148695	3.08488	38.4079	78.9891	173.183	31.6357	1.87392	0.632392	1.11312	0.205688
AB08-11	1885.13	18.8514	3.47651		1.44828	37	0.00994722	0.0188054	8.13418	0.110609	98.222	14.7111	0.835019	17.352	75.382	1.02507	2.6768	1.85959	0.23994	2.96387	39.798	77.4854	184.817	33.7571	1.25731	1.37749	1.85474	0.710085
AB08-11	1885.68	18.8569	3.48201		1.36484	37	0.0157355	0.025867	7.06949	0.108086	88.9433	14.5306	0.84123	1.04276	36.5973	13.7451	3.69596	0.453581	0.243186	3.85215	36.6194	69.6837	152.144	28.5549	1.06155	0.342243	2.39642	0.591529
AB08-11	1886.23	18.8624	3.48751		1.40272	37	0.0172824	0.0397823	7.89321	0.102123	83.5467	14.3746	1.30794	4.62585	91.7301	2.72282	0.832474	0.726288	0.430309	2.88422	38.1759	66.4147	152.894	27.0627	0.606867	1.14425	2.51639	0.446493
AB08-11	1886.79	18.8679	3.49301		1.36519	37	-0.000197863	0.044308	6.82903	0.0981705	71.5812	14.1134	1.33892	7.42652	33.8953	4.53356	1.2904	1.35275	0.269228	4.63281	33.9444	58.1348	126.77	22.3966	1.47002	2.06401	3.41771	0.399685
AB08-11	1887.34	18.8734	3.49851		1.00886	37	0.00460577	0.041301	5.4849	0.0659928	47.4781	10.8541	1.80153	14.4358	12.4087	4.44573	3.59727	1.22232	0.200133	2.6016	23.1364	37.7091	80.4839	13.9242	1.1579	0.948045	2.63143	0.185676
AB08-11	1887.89	18.8789	3.50402		1.17402	37	0.00154934	0.0622905	6.19612	0.0782725	39.3987	11.5636	2.42592	25.966	28.9842	3.32237	9.25668	0.892894	0.393553	2.63785	23.3791	35.0569	73.9861	12.5852	0.754079	2.60182	3.01162	0.887547
AB08-11	1888.44	18.8844	3.50952		0.975424	37	0.0157178	0.06005	4.89013	0.0381341	14.136	9.23311	1.19815	32.3601	150.235	12.7373	1.15898	0.638089	0.0978456	1.58701	16.23	23.9908	48.4708	7.96114	0.478292	1.98435	3.38564	0.15919
AB08-11	1888.99	18.8899	3.51502		0.831932	37	0.0144064	0.0624187	4.54202	0.0391792	6.89377	8.89006	0.875925	44.8182	11.8427	6.87654	1.15755	0.670573	0.109653	1.18527	13.6678	17.544	35.5195	5.5796	0.401253	3.36478	1.74399	0.492684
AB08-11	1889.54	18.8954	3.52052		0.713858	37	0.00263216	0.0510078	3.71616	0.0303796	12.3298	6.98318	0.698453	44.6908	114.362	1.62588	1.2322	0.226658	0.186936	1.15542	9.88881	14.931	24.7654	4.12185	2.0112	2.27406	1.01326	1.55448
AB08-11	1890.09	18.9009	3.52602		0.632184	37	0.00698184	0.0435515	3.23461	0.0232294	23.9752	7.44455	0.790256	47.888	45.1287	2.34869	1.98109	0.163216	0.0895449	1.24307	10.805	12.2327	17.5286	3.39174	1.24877	2.09907	0.975018	0.62437
AB08-11	1890.64	18.9064	3.53152		0.616181	37	0.00741588	0.0360211	3.44591	0.0323711	11.6027	6.59779	0.390361	42.926	55.5208	2.37745	1.97258	0.47399	0.188253	1.27053	10.433	12.4533	24.7111	3.96505	2.2393	1.08464	0.972714	0.48366
AB08-11	1891.19	18.9119	3.53702		0.704175	37	0.00689988	0.0331922	4.38803	0.0351001	25.3405	7.76206	0.328153	41.9857	181.335	4.32005	2.50299	0.191394	0.234478	1.45767	13.137	16.7381	41.671	6.92407	0.666683	1.79761	0.432153	1.0276
AB08-11	1891.74	18.9174	3.54252		0.83547	37	0.00425761	0.0277348	4.59164	0.0465726	22.9933	9.31465	0.22146	33.445	21.5773	2.02397	0.748058	1.17682	0.209814	1.80944	15.446	24.3241	51.9103	9.80871	0.708304	1.73351	0.517254	0.526768
AB08-11	1892.29	18.9229	3.54802		0.939015	37	0.00613461	0.0197414	5.68961	0.0595988	13.2889	10.23	0.241657	33.3579	23.6684	14.8303	0.746765	0.548736	0.400496	1.83219	19.1096	33.4847	71.8972	13.8417	2.80063	2.91775	1.13524	0.472058
AB08-11	1892.84	18.9284	3.55352		1.08862	37	0.00287862	0.014368	6.18352	0.0560919	45.9369	10.8288	0.178294	21.1139	11.1533	7.47682	3.50693	2.51306	0.392312	2.33804	22.8601	43.2819	97.3702	19.0792	0.615879	2.82069	2.65222	0.488572
AB08-11	1893.39	18.9339	3.55902		1.10555	37	0.0163045	0.0104607	5.92793	0.0693861	58.9748	12.1398	0.749198	16.1076	19.9937	10.4531	3.77642	0.396868	0.257903	4.96453	28.6996	52.4113	126.273	22.8392	3.1777	3.93073	3.09704	0.345105
AB08-11	1893.94	18.9394	3.56452		1.22243	37	0.012329	0.00561436	8.01304	0.0938437	65.4943	14.0633	0.193428	9.21605	14.0388	11.3953	3.33627	1.07489	0.521921	4.77302	34.7325	67.9907	155.396	29.492	1.34708	2.26798	2.94856	0.606958
AB08-11	1894.49	18.9449	3.57003		1.22322	37	0.0150102	0.00358458	7.27122	0.0859782	70.471	13.335	0.17579	10.3349	5.96418	24.1926	1.61329	1.64393	0.299276	4.04741	28.5256	68.6177	149.551	29.5304	1.98644	1.40672	2.64733	0.376858
AB08-11	1895.04	18.9504	3.57553		1.22265	37	0.0126732	0.00824558	6.98376	0.104149	99.5973	13.2821	0.739077	9.99365	20.5382	5.90192	1.81828	0.72361	0.254419	2.4399	36.1086	71.421	165.289	31.4789	0.785328	2.05235	1.34682	0.932062
AB08-11	1895.59	18.9559	3.58103		1.34104	37	0.0152425	0.000216357	7.37231	0.106565	96.0086	13.7526	0.17851	4.31131	3.94861	7.86862	2.64675	0.822641	0.259467	4.25748	33.3636	72.9755	165.714	30.9459	0.837766	1.42849	0.847768	1.09252
AB08-11	1896.14	18.9614	3.58653		1.36649	37	0.00888019	0.00211959	7.67489	0.105865	131.291	14.8116	0.624381	1.97945	69.082	3.81147	2.34074	0.842126	0.174626	2.39632	31.7601	71.33	160.222	30.3744	1.08399	0.645935	0.531457	0.391754
AB08-11	1896.69	18.9669	3.59203		1.38421	37	0.0046175	0.00132595	8.07786	0.103443	95.4713	15.3639	0.186125	0.979796	5.84809	8.6033	1.48281	0.592874	0.177862	4.74651	39.7614	70.3611	158.122	28.4271	1.91108	0.450024	0.849666	0.695056
AB08-11	1897.24	18.9724	3.59753		1.34492	37	0.0147853	0.000237483	7.40475	0.113562	113.621	13.6926	0.173156	2.67251	104.425	0.735871	2.07824	0.962232	0.100808	2.69969	32.4535	52.412	127.736	22.6735	3.31558	0.869921	1.30047	0.715481
AB08-11	1897.79	18.9779	3.60303		1.3286	37	0.00275282	0.0012965	7.28036	0.100449	85.3362	15.3103	0.23918	11.47	18.785	3.64756	2.73443	0.704861	0.184156	1.95423	32.2238	50.1677	122.45	17.8776	2.48994	0.285298	1.46885	0.501119
AB08-11	1898.34	18.9834	3.60853		1.32964	37	0.0147676	0.00259691	7.31679	0.110451	73.3399	14.3026	0.24891	18.6461	77.2757	7.63131	1.98643	0.481041	0.324169	2.32682	31.0246	47.5727	99.8388	19.092	2.51797	0.693258	0.908004	0.521505
AB08-11	1898.89	18.9889	3.61403		1.40614	37	0.000580877	0.00183773	8.37276	0.129528	94.2555	14.8871	-0.0382938	37.0545	20.245	2.1918	2.4279	0.672485	0.381454	2.40964	29.0477	51.878	107.194	18.1142	0.862376	0.512704	1.38006	0.284329
AB08-11	1899.44	18.9944	3.61953		1.41292	37	0.00284142	0.00102865	7.33547	0.120254	103.424	14.0774	0.17599	43.7387	13.2774	6.49988	1.54411	0.393637	0.168177	2.30782	28.0966	45.3591	96.7357	15.0146	0.135546	0.36	1.61332	0.167343
AB08-11	1899.99	18.9999	3.62503		1.36707	37	0.0113273	0.000757427	7.86228	0.109321	80.6439	13.5924	0.171829	39.866	8.65845	2.60171	6.01537	0.221322	0.142812	3.10474	28.2426	47.587	96.4794	16.6916	1.65787	1.31105	1.8918	0.368366
AB08-11	1900.54	19.0054	3.63053		1.51551	37	-0.0030532	0.00205231	8.36567	0.134208	93.7249	15.15	0.338122	44.9025	150.034	0.996403	1.49188	0.596501	0.15564	3.53827	33.5274	52.2932	113.003	18.4969	0.376212	0.80136	1.95831	0.289758
AB08-11	1901.09	19.0109	3.63603		1.4477	37	0.00545263	0.0019019	8.37418	0.138561	87.8509	14.1488	0.0363892	44.1108	29.8084	1.46382	1.7934	0.596254	0.248776	2.60923	32.0421	57.7372	112.846	20.973	4.89863	0.452589	1.92304	0.252421
AB08-11	1901.64	19.0164	3.64154		1.53959	37	0.0129516	0.00131355	8.55418	0.127077	86.5364	15.4215	-0.0384251	47.7068	140.814	1.14567	1.46894	0.324953	0.222102	4.09301	31.4662	54.5356	124.566	20.7315	1.62673	0.583107	1.31691	0.138666
AB08-11	1902.19	19.0219	3.64704		1.54723	37	0.0191081	0.00070103	9.1353	0.127772	77.8689	15.0059	0.194244	47.8033	86.6883	2.62901	2.48811	0.526602	0.209799	2.06592	34.268	60.2136	125.83	22.7671	3.07769	0.686603	1.78066	0.30056
AB08-11	1902.74	19.0274	3.65254		1.4881	37	0.0120293	0.00298394	8.65216	0.112019	89.2503	16.0807	0.195347	42.6651	5.3692	5.64444	1.63511	-0.0263638	0.162359	3.04567	32.518	55.7511	117.305	22.5132	0.795783	0.981407	4.27309	0.14691
AB08-11	1903.29	19.0329	3.65804		1.45848	37	-0.00393516	0.00178425	7.78645	0.107424	70.4642	14.6678	0.267365	37.462	39.9139	3.4646	1.59533	0.697517	0.205857	2.18451	36.6206	49.4889	106.678	18.2902	0.304201	0.24796	0.799899	0.143336
AB08-11	1903.84	19.0384	3.66354		1.34738	37	0.00910212	0.00232395	7.25429	0.0925243	46.4504	13.7542	0.310456	23.656	4.29533	2.69548	0.329039	0.547694	0.142905	4.52681	24.4779	40.1552	87.6018	14.8824	1.33944	0.351717	0.848219	0.0951222
AB08-11	1904.39	19.0439	3.66904		1.29247	37	0.00875582	0.00427895	7.64766	0.0884776	63.2505	14.3702	0.252755	17.2304	5.59684	1.95617	0.417515	0.403007	0.239464	2.51157	26.1222	40.4182	81.2626	13.7243	0.994404	0.234411	0.623518	0.171327
AB08-11	1904.94	19.0494	3.67454		1.34182	37	0.014773	0.00578494	7.88577	0.0901998	32.2113	14.8658	0.10883	12.7448	88.0078	1.19737	-0.0189541	0.407602	0.196827	2.99172	23.0791	37.7307	80.7907	12.9168	0.0274781	0.50846	0.898995	0.137048
AB08-11	1905.49	19.0549	3.68004		1.42775	37	0.00972898	0.0053933	7.81236	0.0751103	33.6286	14.4681	0.109755	9.60223	27.8182	0.715412	0.648353	1.02128	0.0383645	1.95465	25.2009	37.4867	70.8437	11.5986	0.331274	0.718045	0.331505	0.138213
AB08-11	1906.04	19.0604	3.68554		1.28094	37	0.0123519	0.00602751	7.43213	0.0725735	49.9064	13.0408	0.165656	4.96373	8.7622	1.88721	1.58714	0.4491	0.158302	2.0355	21.6741	29.1479	55.2519	9.60042	1.08527	0.585553	0.420788	0.355133
AB08-11	1906.59	19.0659	3.69104		1.30484	37	0.0128757	0.00484663	6.648	0.0685413	21.9271	14.2414	0.311792	10.4029	9.68966	2.33716	0.330455	0.222419	0.229498	2.83489	21.2357	28.6603	62.5884	9.09456	0.0260376	1.12468	0.375055	-0.00746598
AB08-11	1907.14	19.0714	3.69654		1.23378	37	0.00342859	0.00794537	6.5134	0.0589416	34.8232	12.6915	-0.0349116	11.107	6.52271	6.72583	0.996613	0.454164	0.0558234	2.47353	17.882	24.205	45.9916	7.46736	0.232792	0.966366	0.363856	0.159294
AB08-11	1907.69	19.0769	3.70204		0.934466	37	0.00737711	0.0125985	5.33667	0.0440162	29.3086	10.2042	0.320982	15.4145	1.8627	5.93945	0.454104	0.118269	0.211262	1.54586	12.1653	18.1009	31.2448	5.31244	0.35202	0.676096	0.609999	0.109307
AB08-11	1908.24	19.0824	3.70755		0.966693	37	0.00679825	0.0215285	5.26374	0.0420438	14.9468	10.3358	0.67715	22.9841	1.71916	0.726729	0.575571	0.396908	0.176353	1.31529	12.7903	15.8178	33.3716	4.40566	0.71732	1.22608	0.991752	0.110103
AB08-11	1908.79	19.0879	3.71305		0.938376	37	0.00710996	0.0396987	5.24181	0.033415	16.7579	10.5529	0.912449	24.2118	6.22062	0.830738	1.34274	0.396652	0.0669665	1.07276	11.0201	12.3287	26.1897	4.01163	0.173104	0.952933	0.991113	0.168211
AB08-11	1909.34	19.0934	3.71855		0.997722	37	0.012561	0.0628271	5.2151	0.0436374	14.4692	9.79482	1.85312	21.6434	7.33462	1.58468	1.26329	0.337575	0.106652	1.48055	11.6046	17.1164	26.5714	4.29562	0.490177	1.54487	1.27242	0.233531
AB08-11	1909.89	19.0989	3.72405		1.05396	37	0.0157851	0.0690929	5.60536	0.0395518	23.8459	10.6906	1.61167	17.1854	6.05739	3.86388	1.50435	0.723587	0.150045	1.54029	15.2795	16.9643	30.6061	6.37408	1.38527	1.02266	1.38158	0.18052
AB08-11	1910.44	19.1044	3.72955		0.583189	37	-0.000283498	0.0305103	3.01023	0.0312144	17.7494	5.97841	0.842055	7.27545	32.6477	0.652499	1.26603	0.190986	0.0815967	1.33128	9.02508	12.7633	25.7086	4.45247	1.68788	0.842238	0.704165	0.777241
AB08-11	1910.99	19.1099	3.73505		1.32595	37	-0.00221414	0.0517158	6.5254	0.0664583	30.3596	12.7279	1.97093	12.2501	536.273	3.62253	2.29214	1.37731	0.291558	3.94888	26.6905	37.2619	72.2042	15.0753	45.4374	1.40976	5.94735	12.6007
AB08-11	1911.54	19.1154	3.74055		1.42025	37	0.0177653	0.0359184	7.12048	0.073292	60.2239	12.9531	0.705285	7.41115	3338.63	3.19171	3.03582	2.7778	0.498233	5.9289	28.9958	54.7554	107.17	20.8577	163.248	2.16505	12.2723	28.4505
AB08-11	1912.09	19.1209	3.74605		1.42897	37	-0.000208047	0.0302464	6.31305	0.0870363	52.9296	14.227	1.19105	6.24447	7629.69	9.02988	9.17603	5.08141	1.02	14.0603	42.7445	64.9894	149.858	26.6716	288.791	2.10346	21.4863	47.7336
AB08-11	1912.64	19.1264	3.75155		1.48388	37	0.0114332	0.0336943	6.99432	0.0780651	64.0217	14.6848	1.45704	4.93363	12535.8	10.5069	15.343	11.7778	1.95721	26.8253	56.5054	79.473	162.131	31.3962	379.413	2.86821	30.6018	54.1533
AB08-11	1913.19	19.1319	3.75705		1.38095	37	0.00994916	0.0351344	6.58476	0.0795968	52.5278	14.081	1.78612	6.92316	12892.2	16.1219	20.6647	12.9249	2.95331	29.3114	56.7554	72.2515	147.604	28.1716	369.026	2.58665	47.3874	51.0139
AB08-11	1913.74	19.1374	3.76255		1.21541	37	0.00304046	0.0372083	6.25692	0.0906812	54.1716	11.8304	1.16962	10.0061	13434.9	19.7364	25.2597	17.7077	3.34301	35.2537	60.3073	71.7333	144.349	26.1287	312.635	2.13297	39.1049	47.3146
AB08-11	1914.29	19.1429	3.76805		1.21023	37	0.0127515	0.0382106	6.18042	0.0606616	47.6801	11.127	0.747451	17.4916	10143.4	18.6823	21.3797	15.1588	2.91071	28.5579	46.2161	61.0917	109.273	21.5309	255.104	2.07534	24.1586	32.283
AB08-11	1914.84	19.1484	3.77355		0.907381	37	0.0162461	0.033747	5.43694	0.0514778	24.4067	9.10546	0.77724	26.532	6304.53	10.1711	14.7734	9.68962	1.74026	20.5594	36.5009	40.4601	82.8113	14.1457	145.636	1.83792	15.8734	20.7669
AB08-11	1915.39	19.1539	3.77906		0.841993	37	0.0125896	0.0386145	4.69354	0.0373904	27.8254	8.83702	0.673047	30.9269	4204.64	6.7378	9.00863	5.76053	1.07767	11.9286	26.0707	30.7474	51.9947	10.4059	91.3717	1.76888	10.2296	12.4079
AB08-11	1915.94	19.1594	3.78456		0.872118	37	0.00563609	0.0609037	4.47971	0.0380226	22.3015	9.21265	1.61843	44.9358	2803.27	6.7223	7.38682	5.46846	0.837182	9.42396	19.6389	24.7667	48.0498	7.59522	56.7171	1.86411	7.06172	7.59857
AB08-11	1916.49	19.1649	3.79006		0.874235	37	-0.00449257	0.0890583	4.68171	0.0354248	19.9173	8.65965	1.40875	46.0954	1761.33	3.64286	5.00097	1.94575	0.6344	5.29475	16.6697	18.7219	37.1961	5.67792	37.7909	1.62179	4.75601	5.56291
AB08-11	1917.04	19.1704	3.79556		0.935956	37	0.012475	0.118255	5.17138	0.0274349	22.0431	9.44624	2.89645	45.1713	1070.89	4.22923	3.17352	2.22842	0.446276	4.55413	16.2959	17.3237	26.9957	5.61354	22.562	1.85375	4.12801	2.28813
AB08-11	1917.59	19.1759	3.80106		1.05078	37	0.00288106	0.124711	4.89778	0.0414936	14.0994	10.1143	2.94675	45.0437	625.673	1.45555	2.39705	2.06904	0.620575	4.01361	13.0082	15.9176	30.3992	5.04408	13.7422	0.966472	2.6312	1.99616
AB08-11	1918.14	19.1814	3.80656		1.04048	37	0.00489877	0.119662	6.09984	0.0440081	26.5866	11.2084	3.01323	34.6882	365.217	3.23714	2.4256	1.57269	0.286306	1.92751	17.158	18.9434	39.2264	5.8505	9.22917	1.6588	2.00632	0.82863
AB08-11	1918.69	19.1869	3.81206		1.13781	37	0.0122272	0.0993563	5.54538	0.0567691	24.5964	10.9081	2.54969	27.5365	179.875	1.35079	1.14095	0.537933	0.329548	2.49349	20.4144	24.4651	47.1592	7.20803	5.22144	0.785549	1.89038	1.33574
AB08-11	1919.24	19.1924	3.81756		1.20136	37	0.0102502	0.0909162	6.49321	0.0668473	31.6427	11.8787	3.27966	22.5017	114.145	2.359	1.13722	0.740062	0.30477	1.75612	20.3276	29.9871	53.2652	9.6035	2.02291	1.2326	1.93799	0.348183
AB08-11	1919.79	19.1979	3.82306		1.23583	37	0.0128358	0.110115	6.71238	0.0707185	28.0269	12.0877	3.24788	22.37	142.868	5.94597	1.98469	0.732891	0.257682	2.91044	22.8232	32.9623	61.9545	10.3436	2.51575	1.15466	1.26619	1.04976
AB08-11	1920.34	19.2034	3.82856		1.07562	37	0.00814994	0.143327	5.94665	0.0547728	32.0023	10.1524	4.7435	20.8079	49.0821	13.639	2.09628	0.7825	0.108792	2.27315	18.4494	27.9748	50.3497	8.31927	1.70791	1.17466	1.32629	0.330045
AB08-11	1920.89	19.2089	3.83406		0.941963	37	0.00591876	0.211851	5.75367	0.0516383	20.0709	10.884	4.04985	32.6279	56.627	29.75	1.45827	1.16013	0.220894	1.76772	20.1786	28.6703	51.317	9.05729	1.1575	1.70129	2.31943	0.356313
AB08-11	1921.44	19.2144	3.83956		0.792843	37	0.00441127	0.21002	4.21699	0.0440768	28.4283	8.04749	4.68449	33.2224	39.6347	31.0977	1.74895	0.71656	0.169819	2.0816	16.9684	23.399	46.0238	7.82988	1.44755	1.28562	1.08477	0.358292
AB08-11	1921.99	19.2199	3.84507		0.744427	37	0.00924904	0.215697	4.14891	0.050784	25.6141	7.74444	4.68825	35.7228	30.4854	43.185	2.53001	0.478433	0.293097	1.4734	17.0551	24.6404	49.9189	8.42997	1.41814	0.866414	1.18334	0.471304
AB08-11	1922.54	19.2254	3.85057		0.763919	37	0.014361	0.177078	4.29559	0.0465405	22.2395	8.84959	4.39717	32.682	20.3778	49.005	1.15486	0.486388	0.183929	1.87623	17.4186	26.6911	58.7693	9.22795	0.968823	1.10821	0.781382	0.236269
AB08-11	1923.09	19.2309	3.85607		0.789698	37	0.00707424	0.136395	4.57619	0.0508937	38.1848	8.36835	2.60547	26.6354	20.1788	35.3313	1.01503	0.736335	0.232245	1.83136	19.3151	29.7698	64.2334	10.5742	0.485954	1.33811	0.758827	0.310772
AB08-11	1923.64	19.2364	3.86157		0.946175	37	-0.000217772	0.12555	5.39013	0.0612863	40.2026	9.97429	2.07875	25.5164	22.7738	33.6793	0.738241	0.598155	0.0859482	2.77264	23.7818	36.2845	82.3629	13.8374	1.11391	1.08322	1.23748	0.215891
AB08-11	1924.19	19.2419	3.86707		1.05075	37	0.0104304	0.0704069	5.26531	0.0558463	46.4182	11.2275	1.86685	18.4244	14.8921	22.5285	0.897014	0.333627	0.322286	3.26417	26.0573	41.8113	85.3787	15.4086	0.380316	0.880579	0.30662	0.104729
AB08-11	1924.74	19.2474	3.87257		1.07396	37	0.0126273	0.0500235	6.8626	0.0745312	43.393	12.0878	0.731645	12.8859	12.3944	20.4649	0.598459	0.065007	0.0876729	3.93568	28.7743	49.2961	102.798	16.3045	1.37355	0.320517	0.486562	0.220223
AB08-11	1925.29	19.2529	3.87807		1.18899	37	0.0141317	0.0298935	8.09814	0.0767081	23.5698	13.2406	1.05999	9.53581	100.787	14.5342	0.137225	0.0662391	0.259402	3.52668	31.9786	53.1544	100.48	18.2585	3.25373	0.181263	0.280207	0.612458
AB08-11	1925.84	19.2584	3.88357		0.795486	37	0.00827227	0.0107934	4.33905	0.0481304	21.5491	8.64756	0.307513	2.81575	33.869	4.51792	0.177845	0.207549	0.0685614	2.12791	17.6907	31.3934	62.3664	11.1091	1.59825	-0.0221623	0.234106	0.510029
AB08-11	1926.39	19.2639	3.88907		1.28105	37	0.00307484	0.010984	7.05321	0.0867972	38.4031	13.62	0.574006	3.0777	124.038	3.9379	0.287602	0.335638	0.300523	2.4974	31.7024	42.283	94.3301	18.0521	8.64206	0.176867	0.694108	2.41549
AB08-11	1926.94	19.2694	3.89457		1.25924	37	0.00951054	0.00624834	7.19003	0.084295	33.1209	13.7409	0.413808	2.34725	441.276	10.2686	1.56842	0.685752	0.109088	3.38571	29.6207	51.3177	92.2579	16.8064	18.065	0.104258	0.820901	4.64988
AB08-11	1927.49	19.2749	3.90007		1.35414	37	0.00693632	0.00724286	8.35433	0.0773136	48.9728	16.2045	0.351696	1.96843	610.069	1.66231	-0.0202592	0.0661034	0.137643	1.42816	29.1577	45.564	93.2549	16.7958	17.6915	0.0358604	1.21189	4.87228
AB08-11	1928.04	19.2804	3.90557		1.44069	37	-0.00281483	0.00482177	8.04176	0.0992886	36.4156	14.4487	0.199014	1.48125	656.105	4.07951	1.02332	0.350735	0.140634	3.10283	26.977	43.9554	89.0527	15.1978	18.364	0.629371	0.835235	4.34467
AB08-11	1928.59	19.2859	3.91107		1.30799	37	0.0170386	0.00301008	7.36278	0.0816001	31.6214	14.652	0.334801	0.976107	512.804	0.622496	0.354841	0.0629278	0.0848687	3.04409	26.9796	39.4591	77.7153	13.264	14.1215	0.0341376	1.1878	3.56873
AB08-11	1929.14	19.2914	3.91658		1.35299	37	0.0129697	0.00149605	7.89995	0.0827227	32.3278	14.4624	0.196744	2.22642	433.31	3.96275	0.217718	0.160092	0.13903	2.41749	25.8446	42.1705	79.2081	13.2645	11.6101	0.109468	0.753277	3.23859
AB08-11	1929.69	19.2969	3.92208		1.35312	37	0.0135186	0.00303103	7.71111	0.092052	52.7649	14.1639	0.261922	1.1185	350.965	0.593495	0.734041	-0.0251987	0.155183	3.06527	26.1892	42.0279	71.9737	12.1127	6.23556	0.312424	0.852356	2.85074
AB08-11	1930.24	19.3024	3.92758		1.38267	37	0.0138981	0.00498374	7.94467	0.0963842	78.0866	14.3364	0.357253	0.89787	199.802	0.628919	0.139107	0.254849	0.26296	2.758	32.729	47.8037	89.1194	13.0037	4.89157	0.183749	0.211205	1.64366
AB08-11	1930.79	19.3079	3.93308		1.27133	37	0.00799364	0.00483625	7.8473	0.106721	63.3801	13.4257	0.398723	0.644488	132.354	0.122657	-0.0187788	0.489473	0.105111	2.3676	31.1895	41.888	77.8047	13.9882	2.59938	0.0332401	0.2592	0.674233
AB08-11	1931.34	19.3134	3.93858		1.46608	37	0.00196343	0.00151556	9.1225	0.109573	68.9465	15.922	0.203624	1.07192	94.7522	0.174684	0.38967	0.262275	0.0678526	4.01557	30.4814	49.1967	91.5964	14.9648	1.50217	-0.0383194	0.554713	0.598466
AB08-11	1931.89	19.3189	3.94408		1.3026	37	-0.00430927	0.00294638	7.73097	0.0975971	88.6758	13.7801	0.188943	0.400013	44.3101	0.22955	0.0565937	0.243366	0.133517	2.94582	30.9566	47.1005	83.4305	14.6756	1.1598	0.17547	0.758189	0.329923
AB08-11	1932.44	19.3244	3.94958		1.3524	37	0.00480328	0.000358481	7.45387	0.112544	77.6158	14.6971	0.115626	1.34731	53.9454	0.961062	0.292383	0.065707	0.136817	2.21911	35.6786	51.7601	93.268	16.5181	0.628819	0.0356453	1.24026	0.299583
AB08-11	1932.99	19.3299	3.95508		1.31274	37	0.00779177	0.00285425	7.80595	0.103417	56.3262	14.6509	0.273577	0.271248	113.682	0.619904	0.137113	0.0661852	0.0407107	3.20167	34.8145	47.1932	95.0985	16.6	0.754193	0.326326	0.56718	0.495635
AB08-11	1933.54	19.3354	3.96058		1.34103	37	-0.00104299	0.00438049	7.32196	0.0975445	58.287	13.6002	0.113205	0.814322	14.7765	1.14398	1.05121	0.0643314	0.20474	2.64232	34.3354	49.8027	91.8746	15.9741	0.69393	0.246614	0.621084	0.55713
AB08-11	1934.09	19.3409	3.96608		1.4169	37	0.0116303	5.14973e-05	7.7164	0.0965575	38.4308	14.4438	0.121304	1.16761	19.3967	0.86321	0.0608401	0.261626	0.143535	1.32154	29.9807	51.0253	105.527	17.1964	0.827448	0.264256	0.665514	0.152756
AB08-11	1934.64	19.3464	3.97158		1.17594	37	0.00374861	0.00115383	6.6418	0.0823269	26.1914	11.9079	0.165672	0.511173	6.68764	1.17728	0.517609	-0.022359	0.0964507	1.89887	29.6619	44.1635	80.1995	14.0801	0.74331	0.0921799	0.298838	0.0257761
AB08-11	1935.19	19.3519	3.97708		1.4187	37	-0.00157077	-0.000504778	8.38762	0.0942285	45.1624	15.1743	0.370132	0.83099	10.1821	1.56647	0.557731	0.0695685	0.119341	2.68813	39.3868	52.4402	91.8482	16.9129	0.792747	0.114057	0.520703	0.0318936
AB08-11	1935.74	19.3574	3.98259		1.34656	37	0.0152895	-0.000668443	7.22892	0.0894319	40.0726	14.7262	0.287649	0.682322	14.8092	1.53034	0.226913	0.166853	0.170426	3.36636	34.0266	56.7097	98.0524	17.0521	0.284942	0.572132	0.256633	0.194979
AB08-11	1936.29	19.3629	3.98809		1.53303	37	0.0177513	0.00241135	8.73131	0.0906698	18.6241	16.7615	-0.0433241	1.44668	27.0741	4.59589	1.65622	0.366382	0.0951525	3.06956	37.0033	55.0183	98.9187	17.3696	0.0742702	1.43142	4.89194	1.43768
AB08-11	1936.84	19.3684	3.99359		1.68902	37	0.0145114	-0.000429285	7.88186	0.102351	37.9209	14.2683	0.281156	4.35489	37.0164	37.2756	17.614	4.91648	1.03976	9.74769	38.4045	54.0434	95.8389	16.3922	0.0302211	3.1708	21.7118	7.68491
AB08-11	1937.39	19.3739	3.99909		1.39212	37	0.00695052	0.00213908	7.57629	0.0813006	47.8586	14.0742	0.116562	17.9552	10.254	153.427	82.366	18.3082	3.29679	21.9081	45.2773	52.8543	98.6351	16.0397	0.271221	6.28578	59.0341	13.5441
AB08-11	1937.94	19.3794	4.00459		1.43376	37	0.013169	-0.00087153	7.61225	0.0876779	45.5181	14.7101	0.206606	34.0896	11.0021	324.058	164.273	36.8328	6.19089	37.1929	69.8143	60.6315	96.5986	15.184	0.329757	7.34678	91.739	22.7316
AB08-11	1938.49	19.3849	4.01009		1.4881	37	0.00241653	0.0100525	8.25805	0.0883318	36.1234	14.7645	0.204366	52.529	81.4418	422.981	210.194	48.8521	7.77831	49.9668	75.5979	64.7647	92.2926	14.4054	0.368377	10.4642	107.506	23.7476
AB08-11	1939.04	19.3904	4.01559		1.39504	37	0.0140413	-0.000428156	7.93751	0.083657	6.71368	14.5113	0.360935	58.9117	1.63224	446.511	212.973	47.2141	8.13101	50.3617	67.1279	58.8934	77.2911	12.694	0.277777	9.71369	111.185	21.4757
AB08-11	1939.59	19.3959	4.02109		1.4261	37	0.0128976	0.00208822	8.38253	0.0739707	34.5075	15.6382	0.0393368	67.2616	12.4408	450.244	219.605	44.9105	7.80223	46.6305	65.5096	53.7067	79.0748	12.374	0.991414	12.4709	95.2641	22.6662
AB08-11	1940.14	19.4014	4.02659		1.47965	37	0.0120832	-7.57393e-05	7.94138	0.0825029	35.9047	14.3809	0.0381459	59.6415	73.6155	372.197	175.572	39.8251	6.66182	34.0255	61.6728	53.4379	73.901	12.2171	0.353696	8.73151	81.7331	18.5398
AB08-11	1940.69	19.4069	4.03209		1.48034	37	0.0152612	0.00165608	7.98766	0.0881478	54.6573	13.8803	0.115505	49.2429	10.0227	277.723	134.907	30.3492	5.65104	28.4232	51.1537	51.8549	83.5751	13.4817	0.148963	6.94956	58.3194	11.8812
AB08-11	1941.24	19.4124	4.03759		1.29985	37	0.00253585	0.000567368	7.48863	0.0854842	30.9228	14.2735	0.108289	31.1508	10.0451	182.766	79.9665	16.5779	3.64964	20.2034	45.7715	47.6398	85.9572	14.238	0.177095	4.08447	30.6568	6.23125
AB08-11	1941.79	19.4179	4.04309		1.4392	37	-0.000652989	0.00140111	7.92222	0.0792244	48.2252	14.6154	0.117455	19.4754	11.5293	109.107	46.434	12.1962	1.95085	11.8394	45.0055	55.5259	103.224	17.7944	0.313907	2.37928	21.5594	4.09811
AB08-11	1942.34	19.4234	4.04859		1.37209	37	0.0127123	0.000326295	7.12961	0.0916705	65.295	15.7927	0.0374884	10.6828	3.0922	61.8198	26.4467	6.55982	1.04842	8.42319	38.7708	63.1135	110.555	21.8964	0.0688927	0.681639	10.1511	2.06243
AB08-11	1942.89	19.4289	4.0541		2.62046	37	0.00227337	0.00173821	8.61336	0.0846083	74.6807	13.8318	0.502027	6.45901	4.94047	32.6223	14.956	2.52751	0.638426	6.33204	36.6387	65.4362	125.339	22.6853	0.545032	0.822741	6.36551	1.48247
AB08-11	1943.44	19.4344	4.0596		1.45407	37	0.00460799	0.000610802	7.73001	0.0999503	64.0471	13.7126	0.260557	3.22647	20.1981	18.7476	9.0508	1.56078	0.339337	5.81055	40.1665	59.0053	124.824	24.6373	0.219755	0.794847	3.51556	0.804411
AB08-11	1943.99	19.4399	4.0651		1.47281	37	0.00774163	0.00267219	8.46468	0.115922	85.9909	15.0066	0.287519	2.86569	2.6267	9.65728	5.85105	1.62507	0.144836	2.857	41.315	73.7775	163.691	28.9701	1.00422	0.648178	1.61479	0.480144
AB08-11	1944.54	19.4454	4.0706		1.55428	37	-0.000671192	-0.00104653	8.36187	0.117907	94.878	15.8208	0.202158	1.11314	3.53087	6.85246	2.83422	1.1234	0.193183	3.8197	42.2334	75.1783	154.753	29.6985	0.1557	0.413529	0.476293	0.312805
AB08-11	1945.09	19.4509	4.0761		1.36175	37	0.00642317	-0.000441908	7.12378	0.0954201	103.275	14.2162	0.114675	0.685439	11.8746	3.6962	1.29732	1.06706	0.135692	3.94534	37.5991	66.2407	149.833	27.4552	0.425416	0.10684	0.664495	0.411652
AB08-11	1945.64	19.4564	4.0816		1.32965	37	0.00930464	0.00359809	7.54208	0.132337	101.789	14.9031	0.0372228	1.28607	42.8438	7.96111	1.67995	0.791555	0.182973	3.30154	34.3814	66.7143	147.479	26.9886	3.50818	0.249104	0.979823	1.51447
AB08-11	1946.19	19.4619	4.0871		1.60055	37	0.0010955	-0.000769891	7.96463	0.34545	115.842	15.7013	0.0400196	0.63517	230.285	4.91847	1.64003	1.04632	0.324844	3.88965	39.6615	71.7271	147.355	27.1848	11.8075	0.344461	1.54608	2.16076
AB08-11	1946.74	19.4674	4.0926		1.48557	37	0.00228614	-0.000630257	7.89862	0.846299	113.62	15.248	0.0375857	1.06458	300.946	3.89417	6.53434	0.249029	0.329154	2.85469	35.8307	57.7784	131.074	22.244	7.13586	0.323511	1.16733	2.5675
AB08-11	1947.29	19.4729	4.0981		1.47454	37	0.00926338	0.00540765	8.22623	1.46175	109.776	15.0199	0.360204	2.64436	188.987	2.87812	2.87736	0.162328	0.190637	4.26363	32.5807	49.041	99.6353	19.0529	5.42667	0.779427	1.35137	2.0146
AB08-11	1947.84	19.4784	4.1036		1.403	37	0.0097816	0.00275879	8.045	1.6255	80.8553	14.4516	0.115093	6.28786	131.904	2.50517	0.524344	0.52247	0.208153	2.84554	26.022	41.6778	87.0331	15.3214	2.45629	1.03996	1.30549	0.834636
AB08-11	1948.39	19.4839	4.1091		1.33589	37	0.00572822	0.00531367	6.75664	1.2444	56.2912	13.8172	-0.0381509	11.9603	69.3384	0.712634	1.16296	0.843647	0.0610031	3.30782	23.4723	31.9304	65.489	10.5736	1.04815	1.73758	1.37491	0.720042
AB08-11	1948.94	19.4894	4.1146		1.14336	37	-0.000551379	0.0107485	5.73846	0.810884	38.6544	11.5253	0.0322846	15.9215	34.4213	3.96782	0.518855	0.292679	0.0966828	2.58923	18.2483	24.1223	42.164	7.04501	0.573657	1.39077	1.88955	0.19093
AB08-11	1949.49	19.495	4.12011		1.22212	37	0.00689895	0.0101248	5.69201	0.606379	38.0427	11.7299	0.0335684	24.3013	17.726	4.465	0.469807	0.468128	0.0360459	1.40868	16.0803	18.5238	39.0546	6.07479	0.632121	1.51036	1.424	0.404511
AB08-11	1950.05	19.5005	4.12561		1.01301	37	0.00599871	0.013764	5.78859	0.328813	17.1976	10.4831	0.0327474	29.9201	16.8701	1.28725	0.866176	0.616483	0.0561324	1.93073	15.3344	17.4892	31.2462	5.28888	0.860121	1.78699	1.29615	0.662552
AB08-11	1950.6	19.506	4.13111		0.901993	37	0.00322535	0.0181862	4.65381	0.180117	18.0502	9.02672	0.0306366	27.4944	35.9412	1.03547	0.555964	0.35249	0.150598	2.19674	13.7678	15.455	24.7722	4.64984	1.91098	1.67181	1.00953	0.212517
AB08-11	1951.14	19.5115	4.13661		0.940474	37	0.0146367	0.0150008	5.11769	0.185162	22.2696	10.7791	-0.0348409	24.7862	128.463	0.740343	3.28843	0.373944	0.263816	1.77813	11.804	17.4859	35.0525	5.81618	4.34072	1.8358	0.578552	1.15617
AB08-11	1951.69	19.517	4.14211		1.00121	37	0.022406	0.0120435	4.98061	0.126425	11.0789	10.6576	0.585104	26.4682	196.022	6.63058	0.811428	0.220568	0.355483	2.10415	18.7271	20.7349	40.7506	6.66117	6.03748	1.24283	0.687165	1.5928
AB08-11	1952.24	19.5225	4.14761		1.09166	37	0.00777461	0.0100152	5.621	0.115509	32.1316	11.4576	0.0341373	22.7538	239.3	0.338734	1.61156	0.725941	0.124089	1.57758	19.8479	23.6873	40.6481	7.18576	5.35686	0.947582	0.252098	1.31911
AB08-11	1952.8	19.528	4.15311		1.15887	37	0.00878274	0.0112631	6.17604	0.0937103	30.8215	12.0115	0.0351349	16.2758	184.73	1.25204	2.02332	0.318519	0.150213	2.51929	19.6703	24.5188	42.4757	8.66939	4.20699	0.302417	0.758515	1.42953
AB08-11	1953.35	19.5335	4.15861		1.29981	37	-0.00217858	0.00876764	5.77319	0.0825	15.1553	12.9589	0.108571	11.8334	167.499	5.70767	0.421268	0.147931	0.218987	2.53415	23.5959	27.5227	50.2316	8.95781	3.63123	0.371883	0.39486	0.85963
AB08-11	1953.89	19.539	4.16411		1.36105	37	0.00363458	0.00328679	7.49227	0.0904894	27.6826	14.8194	-0.0413768	7.584	116.023	2.93538	1.10105	0.538271	0.313306	3.09558	25.2492	27.621	59.7792	10.3143	2.12063	0.775735	0.32159	0.504597
AB08-11	1954.44	19.5445	4.16961		1.41272	37	0.0159444	0.00203818	7.69247	0.0809251	25.5186	14.8378	0.037243	7.45733	54.2718	4.06422	2.37664	0.155887	0.159225	2.03756	22.1549	29.2974	52.4821	10.4773	1.57152	0.249239	0.627695	0.182165
AB08-11	1954.99	19.55	4.17511		1.38176	37	0.0174674	0.0055585	8.73576	0.108983	28.3595	14.116	0.116283	2.91096	29.1935	2.35728	0.765489	0.897309	0.25878	2.39254	26.9036	33.0647	59.7735	10.2676	0.913808	0.32581	0.0644745	0.533564
AB08-11	1955.55	19.5555	4.18061		1.55465	37	0.0024107	-0.000306616	7.2262	0.0829222	15.727	15.4158	-0.0424866	2.55386	15.5269	5.19893	3.43416	0.262596	0.245577	3.85212	28.8105	33.6813	62.3454	11.0434	0.577956	0.341137	0.105037	0.31546
AB08-11	1956.1	19.561	4.18612		1.42414	37	0.0117376	-0.000265587	7.55476	0.0966162	55.8245	14.164	0.0384023	2.61848	23.8859	1.22741	0.138884	0.629239	0.188771	3.24302	26.9841	34.4546	61.9233	11.1129	0.519217	0.33054	0.101775	0.344936
AB08-11	1956.65	19.5665	4.19162		1.31713	37	0.00373345	-0.000507382	6.74437	0.0831388	28.8391	13.6781	0.108941	1.35774	9.19211	2.01306	0.71716	0.321491	0.197028	1.63884	27.2118	32.8671	59.9827	9.95271	0.291154	0.101498	0.161145	0.137188
AB08-11	1957.2	19.572	4.19712		1.4227	37	0.00971452	0.00187144	7.86152	0.1064	27.8721	15.4003	0.119385	3.32737	12.2908	0.671121	0.382559	-0.0269793	0.215916	4.10739	26.9925	40.8524	67.1479	11.4549	0.277791	0.111228	0.0293948	0.42856
AB08-11	1957.75	19.5775	4.20262		1.428	37	-0.00550286	0.00130852	6.5878	0.0959469	28.5339	14.6066	0.0365251	0.943577	107.966	4.15358	0.738643	0.509361	0.296479	1.99828	23.0071	36.0875	66.9905	11.4037	0.183499	0.0345906	1.03063	0.216009
AB08-11	1958.3	19.583	4.20812		1.41376	37	0.0101167	0.000597971	7.27228	0.0841013	59.952	14.4161	0.11413	1.09856	6.14137	0.948625	0.674194	-0.0257917	0.2302	3.45307	26.7054	39.4209	68.5909	12.5849	0.344477	0.319776	0.766874	-0.00826268
AB08-11	1958.85	19.5885	4.21362		1.42535	37	0.000598275	-0.000586768	7.00918	0.103699	71.1479	14.3939	-0.0394408	0.950475	3.57704	0.331291	0.66767	0.423313	0.180856	3.41965	30.612	41.5099	79.3224	14.1685	0.145765	0.175762	-0.00701035	0.6315
AB08-11	1959.4	19.594	4.21912		1.56696	37	0.00362695	-7.64764e-05	7.95564	0.116726	47.3495	15.6337	0.198131	0.851146	7.36004	1.93885	0.539067	0.349181	0.213998	3.90726	30.4898	43.5328	87.7211	15.6869	0.316231	0.405292	-0.00733903	0.188397
AB08-11	1959.95	19.5995	4.22462		1.40927	37	-0.0100137	-0.000880344	7.58808	0.0907667	86.1794	14.2671	0.108226	0.427536	5.69403	0.026059	0.12741	0.319379	0.0829452	2.67576	28.9318	44.8277	89.3325	14.206	0.176991	0.235766	0.0266471	0.568654
AB08-11	1960.5	19.605	4.23012		1.45639	37	0.00881542	4.59921e-05	7.54959	0.0986865	79.4947	14.0844	0.0352657	0.559717	14.2058	0.77093	0.566764	0.40575	0.0378683	3.72724	29.4369	46.0577	94.4601	16.4721	0.177172	0.303542	0.160249	0.316762
AB08-11	1961.05	19.6105	4.23562		1.44278	37	0.00219557	0.000788573	7.62112	0.0991906	62.8708	14.508	0.0360966	0.213305	1.98109	7.32216	0.804906	0.503385	0.246775	3.35501	34.1196	45.289	98.4407	17.3941	0.143009	0.103312	-0.00687783	0.102723
AB08-11	1961.6	19.616	4.24112		1.49729	37	0.0111231	-0.000849668	7.31413	0.158415	96.0218	15.7448	0.262601	0.53227	3.06869	2.86783	2.39785	0.329911	0.202189	3.53703	29.2981	47.6724	98.1396	17.1326	0.144178	-0.0352282	0.0964458	0.0291251
AB08-11	1962.15	19.6215	4.24662		1.4573	37	0.0155513	0.00106452	7.63764	0.513366	108.164	14.8123	0.328847	0.694211	1.42198	1.58682	0.128047	0.320974	0.151371	2.38829	29.9351	43.9324	87.3046	15.8117	0.0650654	0.0335306	-0.00674619	0.209389
AB08-11	1962.7	19.627	4.25212		1.45424	37	-0.00022098	0.000839941	8.0757	1.81897	114.351	16.4694	0.113796	0.311154	85.3811	0.0614169	0.364648	0.15505	0.134652	4.07246	31.5198	46.5494	99.2208	17.2027	0.0680741	0.318841	0.55417	0.0675315
AB08-11	1963.25	19.6325	4.25763		1.37104	37	0.013227	-0.000149026	7.15283	3.64607	95.9388	15.6124	0.241839	1.36661	8.1931	0.732646	1.30388	0.058507	0.164744	2.54547	26.8012	39.9309	85.6954	15.1472	0.310752	0.0317394	0.0888205	0.40386
AB08-11	1963.8	19.638	4.26313		1.50481	37	0.00924265	-1.24448e-05	7.87919	5.28485	115.324	17.8912	0.113586	0.678931	1.89321	1.7933	1.74551	0.425414	0.205429	3.75079	33.1559	46.5365	82.0747	14.9966	0.460646	0.176635	0.378088	0.74808
AB08-11	1964.35	19.6435	4.26863		1.54257	37	0.0115665	0.00172887	7.86584	5.4978	125.309	17.7878	0.116251	0.883357	9.73925	1.59177	0.843832	0.250729	0.137557	4.48187	28.6301	38.9581	86.1841	14.8653	0.672411	0.977955	2.32233	0.417311
AB08-11	1964.9	19.649	4.27413		1.43137	37	0.01045	-0.000709312	7.857	4.40271	109.099	17.151	0.113266	0.952503	14.7844	0.907591	3.19477	-0.0255966	0.228458	2.64375	29.8822	39.7782	78.932	13.753	0.146076	0.105528	0.202456	0.0295085
AB08-11	1965.45	19.6545	4.27963		1.60561	37	0.0129276	0.000488507	8.11149	3.75	109.132	17.3216	0.0381232	0.462649	2.16246	6.82232	0.691824	1.64787	0.0409367	4.19121	25.2464	41.2046	83.4657	13.3238	0.798869	0.109112	0.209334	0.18647
AB08-11	1966	19.66	4.28513		1.50658	37	0.0118152	7.92449e-05	8.36383	2.87135	129.483	16.832	0.19187	0.313313	3.41983	1.84333	1.06402	0.0651156	0.183352	2.99146	28.6215	36.4848	68.5247	12.4222	0.187392	0.0353245	0.204814	0.144296
AB08-11	1966.55	19.6655	4.29063		1.38729	37	0.0136512	-1.16419e-05	7.47277	1.54164	106.776	14.9625	0.0345892	0.548981	4.06298	3.77462	1.27389	0.144779	0.214322	2.62711	33.2544	39.9817	76.044	10.718	0.21051	0.098998	0.0589159	0.275311
AB08-11	1967.1	19.671	4.29613		1.5771	37	0.00668065	-0.000821283	8.32111	1.02	120.765	16.046	-0.0390956	2.07754	10.9974	0.294901	0.661826	0.330623	0.179273	3.6996	29.4594	41.363	77.6317	13.1625	0.0670213	0.0345386	0.131188	0.290282
AB08-11	1967.65	19.6765	4.30163		1.35825	37	0.00696841	0.000545737	7.33641	0.619054	103.583	13.8836	0.174414	0.453698	5.48013	1.45735	0.474537	0.638301	0.10154	2.86334	31.5008	42.3399	81.6499	14.0141	0.278376	0.161977	0.154073	0.0618132
AB08-11	1968.2	19.682	4.30713		1.44387	37	0.00984542	0.000302352	8.13065	0.331186	108.346	14.4676	0.178689	0.637852	4.65568	3.72701	0.990925	0.569191	0.0817864	3.52385	30.4943	41.2507	89.3514	15.9453	0.137625	0.0328978	0.453893	0.0633286
AB08-11	1968.75	19.6875	4.31263		1.27883	37	0.0253482	-0.000657593	7.15794	0.319212	105.402	14.0291	-0.0351443	0.765286	8.07493	2.3427	0.662991	0.217216	0.182146	3.04714	28.3373	42.8169	93.3935	16.1064	0.164705	0.0938319	0.242106	0.0932969
AB08-11	1969.3	19.693	4.31813		1.53003	37	0.0112111	-0.000544595	8.08632	0.198384	127.261	15.738	-0.040804	0.841127	19.889	2.82483	0.532722	0.159323	0.503947	3.05272	34.9533	52.5704	127.647	22.3604	0.06995	-0.0368469	0.136921	-0.00846554
AB08-11	1969.85	19.6985	4.32364		1.35511	37	0.0071533	0.00159011	8.09653	0.145742	120.979	13.6005	0.101439	0.318485	1.56922	0.994754	0.187964	0.702192	0.289174	5.45392	32.6361	52.1312	115.054	21.2193	-0.00945822	0.157745	0.181315	0.836932
AB08-11	1970.4	19.704	4.32914		1.2616	37	0.00922201	-0.000438843	6.95506	0.12061	78.5533	13.3464	0.302212	0.151757	3.64242	0.233226	1.13081	0.215585	0.180778	2.19485	32.2468	55.1653	110.205	21.4785	-0.00932003	0.15544	0.394342	0.45865
AB08-11	1970.95	19.7095	4.33464		1.5237	37	0.0105606	-0.000410531	7.85477	0.189306	107.856	16.025	0.0372608	0.359384	2.25067	1.7384	1.44963	0.155962	0.30245	2.83002	35.4207	62.2882	133.456	25.1478	0.0684744	-0.0360696	0.0987494	0.296575
AB08-11	1971.5	19.715	4.34014		1.40586	37	0.0042289	-0.000174537	7.20264	0.141575	85.3154	13.9856	0.170461	0.360884	2.42847	1.24174	0.25742	0.381269	0.0780201	3.92471	31.2337	50.1554	111.633	21.5177	0.201677	-0.0320785	0.119202	0.162086
AB08-11	1972.05	19.7205	4.34564		1.44927	37	0.0128545	-0.000826566	8.38661	0.171274	78.0394	14.5185	0.26486	0.262606	9.6491	1.88132	0.818466	0.153634	0.156924	3.56747	28.1648	48.8805	111.257	21.3523	0.0284695	0.105053	0.618622	0.25461
AB08-11	1972.6	19.726	4.35114		1.47676	37	0.00431189	0.000710424	7.29971	0.10478	63.176	14.0586	0.243815	1.04118	2.10309	0.738632	0.54302	0.471193	0.144455	3.57109	26.2916	42.793	95.6374	17.054	0.133864	0.290825	0.85742	0.303491
AB08-11	1973.15	19.7315	4.35664		1.52537	37	0.00669763	-0.000733385	8.2704	0.121872	70.7044	15.0007	-0.0391949	1.39986	2.27579	1.00074	1.27068	0.509887	0.273374	2.15568	30.3228	41.7571	92.046	16.6479	0.261353	0.0346263	1.48178	0.0666561
AB08-11	1973.7	19.737	4.36214		1.38157	37	0.00132469	0.00185539	6.60217	0.150174	68.7729	13.697	0.17705	2.47545	4.92964	2.42791	0.910389	0.312028	0.235306	3.78398	24.5557	40.5324	78.8056	13.5785	0.136363	0.691742	1.19935	0.0627476
AB08-11	1974.25	19.7425	4.36764		1.36642	37	0.00328697	0.00311591	7.78143	0.0769065	59.681	15.433	0.107233	3.81458	6.86282	0.827191	0.633454	0.48679	0.328043	3.6893	29.796	38.3486	80.1348	14.6505	0.434881	0.500998	1.38161	0.0993368
AB08-11	1974.8	19.748	4.37314		1.42049	37	0.00910172	0.00144939	7.08641	0.0775084	69.6564	13.9126	0.0348611	2.94137	13.6573	7.84049	0.922085	0.145918	0.193685	2.05535	31.0729	41.5354	84.6902	14.9711	1.54506	0.366822	0.950668	0.384435
AB08-11	1975.35	19.7535	4.37864		1.4336	37	0.00475615	0.00170269	7.29533	0.0742192	86.3972	14.3017	0.268935	3.46944	42.4161	1.49923	0.521604	0.337869	0.135475	3.62235	30.2054	41.607	87.8236	16.1055	0.860145	0.249416	1.22809	0.525343
AB08-11	1975.9	19.759	4.38414		1.43452	37	-0.00189117	0.000571699	7.13013	0.0817019	77.1793	14.493	0.0374271	3.06465	33.6943	1.33372	0.601501	0.247978	0.207941	3.63767	32.4511	45.9971	96.4958	16.8149	0.625282	0.537172	1.62313	0.106509
AB08-11	1976.45	19.7645	4.38964		1.52039	37	0.00469911	0.000865148	7.65386	0.0874389	88.8969	14.412	0.0368225	1.96005	20.4614	0.162494	0.209606	0.603353	0.181005	2.01455	29.4467	51.9475	94.714	17.1003	0.263209	0.175907	0.760079	0.217767
AB08-11	1977	19.77	4.39515		1.52618	37	0.0113087	0.00129515	8.10241	0.10167	90.5072	14.9393	0.190322	2.19981	16.8116	0.774846	1.20904	0.425693	0.205563	4.22481	31.2822	50.7345	96.9668	19.8935	0.343062	0.105895	1.14911	-0.00822873
AB08-11	1977.55	19.7755	4.40065		1.59329	37	0.00998063	0.000439285	7.59437	0.148814	102.574	14.697	0.188536	0.901208	12.2668	1.23878	0.284716	0.421699	0.109761	2.78377	37.5098	55.7635	107.865	19.7932	0.223062	0.245283	0.9995	-0.00815151
AB08-11	1978.1	19.781	4.40615		1.43958	37	0.0158443	-1.18417e-05	7.62405	0.133613	107.483	14.8456	0.108081	0.295529	9.76691	1.54452	0.565433	0.576486	0.263055	3.41954	36.7651	57.9102	112.85	21.0467	0.139389	0.235452	1.65906	0.100123
AB08-11	1978.65	19.7865	4.41165		1.48612	37	0.0112094	9.73472e-05	7.73711	0.121529	115.809	16.2329	-0.0354359	1.75957	6.86397	0.93512	1.01158	0.783608	0.289487	3.21285	35.6126	55.7168	120.106	21.4314	0.0256396	0.284525	2.24773	0.0602633
AB08-11	1979.2	19.792	4.41715		1.49166	37	0.0139962	0.000355775	7.2182	0.0975303	113.676	14.7553	0.0978897	0.347024	2.86291	4.7362	0.842843	0.599876	0.279057	4.04473	35.2749	56.6711	121.403	21.6027	0.39699	0.0912016	2.04605	0.0255026
AB08-11	1979.75	19.7975	4.42265		1.32466	37	0.0128076	-0.00125564	7.3409	0.103082	89.0808	13.7798	0.0291592	0.535422	4.17632	0.396446	0.71074	0.40664	0.143335	3.45349	34.7953	51.8586	111.005	19.4641	0.301339	0.0834567	1.43052	-0.00648513
AB08-11	1980.3	19.803	4.42815		1.53471	37	-0.00396621	1.49402e-05	6.9549	0.132557	105.225	15.066	0.286826	1.5669	5.44639	1.97987	1.13734	0.12926	0.389083	4.57585	37.4333	50.8912	111.077	19.5124	0.155146	0.265807	1.57349	0.182632
AB08-11	1980.85	19.8085	4.43365		1.42651	37	0.00551501	-1.01332e-05	6.94815	0.106735	80.4026	15.2296	0.154869	0.740278	13.347	0.630508	1.92125	0.787151	0.244381	3.94944	31.7859	48.305	98.3074	17.595	0.0553275	0.259139	1.4485	0.239633
AB08-11	1981.4	19.814	4.43915		1.46722	37	0.00844833	0.00164697	6.89574	0.0830634	91.8009	14.7557	0.0310248	1.30373	5.12856	0.621241	0.69181	0.508354	0.13264	2.61999	27.402	46.3438	101.682	15.8782	0.122915	0.26704	2.13897	0.310399
AB08-11	1981.95	19.8195	4.44465		1.50777	37	0.0051141	0.0024572	8.29038	0.115485	80.212	14.4158	0.175564	1.77423	3.88344	1.05952	1.11529	0.559236	0.211477	2.59223	28.3971	48.1491	97.2273	16.3317	0.207715	0.947381	2.7732	0.0622209
AB08-11	1982.5	19.825	4.45015		1.36665	37	-0.00285551	0.0103253	7.17731	0.0842842	78.9275	14.0555	0.59841	2.40632	4.5005	0.806824	0.82988	1.05632	0.167363	2.87523	27.6856	43.0538	89.4369	14.4842	0.279531	0.68427	2.76647	0.0968909
AB08-11	1983.05	19.8305	4.45565		1.32975	37	-0.00021142	0.015919	6.67047	0.0773654	84.4262	13.035	0.696332	2.68133	4.68468	1.1002	0.716709	0.494236	0.287675	3.29403	24.7121	38.4455	82.8677	13.029	0.215691	0.983758	2.9807	0.173348
AB08-11	1983.6	19.836	4.46116		1.30187	37	0.00470939	0.0303255	6.51101	0.0682793	70.1812	13.3425	0.648605	3.84893	4.19896	1.17949	2.04853	0.244506	0.323176	2.48929	25.1348	36.7526	73.1743	11.1871	0.224591	0.600323	3.83753	0.0295345
AB08-11	1984.15	19.8415	4.46666		1.28649	37	0.00564343	0.0303886	6.26311	0.138464	25.8062	13.8466	0.661955	6.5086	6.98885	1.10001	1.46526	0.341434	0.161019	2.70053	30.1185	34.3855	67.9337	11.2277	0.0692128	0.61268	3.02458	0.184217
AB08-11	1984.7	19.847	4.47216		1.15029	37	0.00730744	0.0294478	6.23865	0.0842858	42.5245	12.1603	1.16228	7.06441	4.18222	1.02553	1.51472	0.995473	0.0960882	2.70961	24.2751	29.7374	51.2514	8.3587	0.0589646	0.767749	2.15137	0.0913098
AB08-11	1985.25	19.8525	4.47766		1.2809	37	0.00395638	0.0357882	6.78733	0.0659778	41.7869	13.3265	1.09046	7.01804	2.80381	2.55388	0.687419	0.391098	0.188858	3.015	23.6098	30.6988	57.8041	9.59706	0.0985696	0.748262	3.69609	0.166264
AB08-11	1985.8	19.858	4.48316		1.21045	37	0.0145786	0.0327946	5.99768	0.0543476	29.4341	11.9539	0.837271	10.2339	3.62386	1.45087	0.587461	0.293473	0.221313	2.45873	23.5322	24.4436	51.3164	7.88994	0.162635	0.464623	1.55749	0.0921244
AB08-11	1986.35	19.8635	4.48866		1.26622	37	0.00171976	0.0273161	6.71877	0.11242	28.1961	12.7387	1.11228	6.85619	2.7323	0.566918	1.20497	0.568118	0.281438	2.33881	24.2696	26.6593	47.9119	8.63667	0.247838	1.49362	1.70097	0.0986694
AB08-11	1986.9	19.869	4.49416		1.36637	37	0.00462837	0.0217987	6.33964	0.0784415	30.6548	14.0268	0.26171	4.86709	7.93199	2.42513	1.41101	0.328792	0.224725	2.1383	28.2213	30.6784	48.3563	8.92468	0.0666501	0.65945	2.26007	0.325766
AB08-11	1987.45	19.8745	4.49966		1.33213	37	-0.000585068	0.0149637	6.72813	0.0955193	26.7621	13.0771	0.247199	4.76786	2.82567	7.57882	1.97277	0.394147	0.321939	3.76619	23.5171	30.1265	57.215	9.15432	0.0629545	0.95091	2.23207	0.0974885
AB08-11	1988	19.88	4.50516		1.32622	37	-0.000580663	0.00989073	6.98911	0.0714765	28.737	13.5476	0.174891	6.17231	2.80439	12.1166	3.79287	1.80144	0.254206	5.32669	29.1129	32.6524	59.365	10.9805	0.206919	0.618196	5.33943	0.444475
AB08-11	1988.55	19.8855	4.51066		1.45841	37	0.00133686	0.0210206	7.33366	0.0733734	38.2531	15.966	0.322618	6.9119	4.52752	9.69601	4.23548	1.67093	0.348672	3.67117	30.6791	42.0028	72.0393	13.0731	0.0638329	1.0307	4.23736	0.276472
AB08-11	1989.1	19.891	4.51616		1.46975	37	0.00782158	0.00398017	6.79603	0.0672104	56.9732	14.2009	0.402394	5.66249	2.96773	7.6189	3.71516	1.29493	0.300719	2.40263	28.8019	34.6284	71.2315	11.577	0.0232365	1.1758	1.44133	0.391643
AB08-11	1989.65	19.8965	4.52166		1.40936	37	0.00180211	0.00476512	7.187	0.100552	67.7342	13.7834	0.152405	3.38566	3.86181	5.49275	2.9977	1.35295	0.430199	4.13833	29.3626	39.5144	75.8472	13.3608	0.148847	0.65219	1.42545	0.357025
AB08-11	1990.2	19.902	4.52716		1.50864	37	0.000151901	0.00088721	6.93569	0.0983583	75.0268	16.54	0.396356	2.82047	4.11775	10.5162	1.82181	1.1315	0.239524	3.36949	30.4376	35.3907	75.3631	13.3367	0.148248	0.480032	0.776759	0.204692
AB08-11	1990.75	19.9075	4.53267		1.34769	37	0.0146361	0.000315994	6.9675	0.0697776	65.6098	13.1868	0.0869443	1.89456	3.27241	4.20663	2.09984	0.325633	0.247855	4.07343	29.1934	42.5007	73.6584	13.1625	0.142188	0.297807	0.798607	0.138433
AB08-11	1991.3	19.913	4.53817		1.36949	37	0.00355284	0.000951477	7.50161	0.0925173	76.1317	14.6328	0.14321	1.37792	3.73127	2.44985	2.64347	0.388246	0.208157	3.06072	29.9183	42.3019	78.2941	14.9036	0.110299	0.50621	0.864658	0.164647
AB08-11	1991.85	19.9185	4.54367		1.43881	37	0.00854034	0.000518728	7.01607	0.0922915	71.043	13.9456	0.0858364	0.513065	3.84769	2.04798	0.797064	0.457836	0.173132	2.59704	28.7462	42.7324	76.4557	13.5019	0.0810245	0.401033	1.0001	0.0509392
AB08-11	1992.4	19.924	4.54917		1.53479	37	0.0107294	0.000795699	7.46638	0.126585	77.9548	14.5684	0.236135	0.519377	4.14495	1.49668	1.00141	0.296662	0.223718	3.04154	27.9328	42.9968	75.3233	13.6574	-0.00937329	0.0936594	0.396595	0.0596576
AB08-11	1992.95	19.9295	4.55467		1.4217	37	0.0104048	0.000655819	6.60276	0.0874503	114.705	14.4073	0.108521	0.560677	3.49951	1.09665	0.421077	0.234058	0.196269	3.43347	30.0589	42.7871	78.7373	12.8564	0.177475	0.101107	0.628838	0.0644015
AB08-11	1993.5	19.935	4.56017		1.51981	37	0.0129963	-0.000189445	7.55875	0.086501	92.6026	15.9792	0.110494	1.42189	6.74064	0.588113	0.802046	0.413836	0.176807	3.34309	32.4472	39.4442	72.5216	12.8606	0.180702	0.0340634	0.197502	0.286288
AB08-11	1994.05	19.9405	4.56567		1.53419	37	0.0125567	-0.000100604	7.32352	0.104313	91.1619	15.7553	0.110145	0.122577	3.41925	1.08013	0.427376	0.325042	0.359909	1.96159	31.0877	38.824	70.9855	11.5073	0.21821	-0.0347083	0.128974	0.0286953
AB08-11	1994.6	19.946	4.57117		1.55974	37	0.010697	0.000132062	7.83615	0.101115	110.277	14.7841	0.180027	0.293973	3.27313	0.507963	0.417161	0.146489	0.328898	1.91471	27.7979	35.8916	59.4078	10.4567	0.101485	0.100167	0.192171	0.206975
AB08-11	1995.15	19.9515	4.57667		1.53914	37	0.00941627	-0.00134691	6.94988	0.0943247	117.825	15.2185	0.249523	0.419642	2.72498	0.311366	0.0532786	0.397854	0.169978	4.09542	28.2114	32.5267	58.0683	10.0531	0.0635466	0.231413	0.124387	-0.00769058
AB08-11	1995.7	19.957	4.58217		1.40754	37	0.00169351	-0.000797167	7.47697	0.0814235	104.306	14.5759	0.034143	0.0316906	3.44513	0.558266	0.619596	0.559448	0.102248	4.33385	31.4448	36.0266	60.7557	10.7059	0.0264825	-0.0330515	0.543116	0.0273255
AB08-11	1996.25	19.9625	4.58767		1.41611	37	0.0174889	-0.000772987	6.48062	0.0983247	111.749	14.0067	-0.0354907	0.401779	2.18255	0.237307	0.532078	0.300138	0.183942	4.62436	29.0632	36.1103	67.9595	11.2149	0.0256792	-0.032049	0.0877418	0.0603566
AB08-11	1996.8	19.968	4.59317		1.50104	37	0.00132254	-0.000491645	6.92879	0.0774388	118.187	14.208	0.105563	0.245851	1.88594	0.183196	0.552256	0.227676	0.168915	2.60992	30.4429	39.5839	80.7653	13.233	0.0631489	0.164158	0.0910693	-0.00764245
AB08-11	1997.35	19.9735	4.59868		1.62296	37	0.00970754	-4.30169e-05	8.14238	0.0905419	87.3836	15.4961	0.114221	0.219716	2.24588	0.0616466	0.366012	0.246351	0.206577	6.45712	33.2413	46.2831	92.474	16.0049	0.107818	0.106417	0.274579	0.0297573
AB08-11	1997.9	19.979	4.60418		1.70542	37	0.00554163	0.000129919	7.25795	0.111287	80.9162	14.7256	0.248443	0.203454	1.31943	0.120318	0.195985	0.312125	0.169243	3.63889	29.8523	43.0618	73.4969	14.5428	0.246105	0.164477	0.482472	-0.0076573
AB08-11	1998.45	19.9845	4.60968		1.73418	37	0.002731	0.00151607	7.456	0.12654	68.552	15.7227	0.195282	0.129785	3.90046	0.376698	0.373706	0.158902	0.405383	4.17363	31.9951	43.2815	85.6521	14.8236	0.150404	0.0359525	0.747676	0.0303829
AB08-11	1999	19.99	4.61518		1.56667	37	0.0141955	0.00158315	7.56629	0.137184	66.9185	14.7471	0.245643	0.413117	8.38462	2.52633	1.18306	0.142487	0.232726	3.164	30.3424	36.457	73.9099	12.9378	0.243331	0.293007	1.1862	0.0272444
AB08-11	1999.55	19.9955	4.62068		1.70136	37	0.0104503	0.00106677	8.09534	0.120416	58.391	14.9373	0.108996	0.651495	1.94728	1.03628	1.15942	0.581365	0.219845	3.90069	28.9467	37.9981	69.8142	12.4955	0.102886	0.237445	0.631588	0.10097
AB08-11	2000.1	20.001	4.62618		1.56567	37	0.0221073	0.00146245	7.16176	0.075724	75.9137	16.8792	0.108058	0.0764519	2.44833	0.704354	0.711348	0.662191	0.240477	4.61434	26.7072	37.0466	71.2435	10.25	0.0272833	0.168039	0.259764	0.0281518
AB08-11	2000.65	20.0065	4.63168		1.68692	37	0.00383181	0.00139351	7.14842	0.112138	47.0732	15.9619	0.0363971	0.21508	6.21823	0.561699	1.26492	0.596383	0.248829	4.31071	30.6753	39.1956	72.9439	11.6326	0.0282309	0.313281	0.544507	0.252476
AB08-11	2001.2	20.012	4.63718		1.44602	37	0.00503319	0.00258394	6.97091	0.0841707	42.3676	14.3778	0.103188	0.407636	6.35673	0.549225	1.02792	0.632346	0.208131	4.12096	28.5817	34.6467	58.7523	10.5437	0.168753	0.160465	0.438899	0.404772
AB08-11	2001.75	20.0175	4.64268		1.69143	37	0.0115451	0.000380126	7.12141	0.113484	32.0459	14.9833	0.31622	0.243585	10.3917	1.3383	0.335149	0.142507	0.232758	4.61085	27.4099	34.714	60.3773	10.5498	0.641119	0.358247	0.509338	0.0620682
AB08-11	2002.3	20.023	4.64818		1.72605	37	0.0114535	0.000476278	7.5469	0.116085	47.415	15.326	0.252071	0.0759236	2.36714	0.699487	0.416384	0.231449	0.126979	3.3952	33.1132	36.3762	73.7214	12.2204	0.0270948	-0.0338156	0.654907	0.135136
AB08-11	2002.85	20.0285	4.65368		1.66866	37	0.00923425	0.00157707	6.71561	0.06206	46.0284	15.0421	0.525751	0.0737034	2.67231	3.82515	0.474599	0.307422	0.231832	3.43999	31.1397	44.8918	71.6693	12.4781	0.13435	0.161998	0.732089	0.131185
AB08-11	2003.4	20.034	4.65918		1.49968	37	0.0029969	0.00519704	6.61535	0.0771805	51.3583	14.7857	0.559375	0.267335	3.67987	1.92353	0.577553	0.676796	0.299094	2.55247	31.0273	40.1827	81.7655	13.6035	0.261297	0.212989	1.07886	0.12312
AB08-11	2003.95	20.0395	4.66468		1.42456	37	0.0101079	0.00762259	6.13542	0.0946673	70.4791	13.5829	1.1806	0.297343	3.7914	1.4952	1.07139	0.129038	0.191019	3.38924	31.8829	43.4306	78.0785	14.1405	0.0566535	0.383426	1.22019	0.0562019
AB08-11	2004.5	20.045	4.67019		1.80066	37	0.00461025	0.0107475	8.11251	0.0967215	98.7902	16.3493	1.15892	0.528388	4.84178	3.14581	1.63046	0.680089	0.177582	2.89732	40.3807	51.2507	100.388	17.7969	0.258232	0.380133	1.94335	0.176702
AB08-11	2005.05	20.0505	4.67569		1.62642	37	0.0196387	0.0102562	7.75513	0.0959418	72.8943	15.9101	1.31297	0.458762	3.96414	0.686521	1.40502	0.561772	0.146578	3.91489	36.1046	56.2288	101.317	17.0627	0.208657	0.426416	1.68197	0.20276
AB08-11	2005.6	20.056	4.68119		1.58529	37	0.00775446	0.0116163	7.85789	0.0798239	62.5735	16.6472	1.86832	1.00681	4.31276	0.650528	1.18331	0.557905	0.254577	3.45398	35.9477	48.1016	100.204	16.2928	1.07511	0.553892	1.3799	0.0968956
AB08-11	2006.15	20.0615	4.68669		1.61775	37	0.0183833	0.0088914	8.13396	0.126891	80.6742	15.1453	1.47693	0.465665	3.57553	0.760765	1.06496	0.230576	0.282481	4.26948	39.8379	51.1583	92.1573	16.442	0.0639534	0.232894	1.27855	0.0634435
AB08-11	2006.7	20.067	4.69219		1.71148	37	0.00767922	0.0067826	7.30674	0.0943568	55.491	14.2459	1.01182	0.24124	3.71252	1.54216	0.961853	0.47022	0.208927	3.70697	40.145	55.4999	89.0862	16.2821	0.0619646	0.290225	1.01529	0.0269857
AB08-11	2007.25	20.0725	4.69769		1.56551	37	-0.0024627	0.00583386	7.78955	0.0957475	62.2058	17.2544	0.87546	0.326474	3.54001	0.211538	0.403467	0.472037	0.188061	2.85848	39.0216	54.7771	86.5504	15.0481	0.134104	0.161701	0.698696	0.304035
AB08-11	2007.8	20.078	4.70319		1.61069	37	0.00249127	0.00357539	7.51584	0.077345	68.0767	17.0828	0.536913	0.161518	2.79276	1.99763	-0.0185283	-0.0240416	0.170232	4.24864	39.7367	54.1943	94.4432	16.4432	0.137202	0.0991169	0.321327	0.13397
AB08-11	2008.35	20.0835	4.70869		1.70096	37	0.00600719	0.00164387	7.73327	0.101427	79.3521	15.8546	0.57864	0.220547	2.94113	0.164699	0.134978	0.338347	0.135666	3.9446	39.1012	59.5132	105.073	16.2788	0.425336	0.178294	0.452323	-0.0083006
AB08-11	2008.9	20.089	4.71419		1.57028	37	0.00533101	0.00130376	8.04755	0.0855613	92.7353	15.2096	0.183011	-0.0112817	2.3454	0.77775	0.571778	0.322532	0.266008	3.60907	43.1257	54.3403	96.4855	17.0483	0.0653812	0.306228	0.229045	0.06486
AB08-11	2009.45	20.0945	4.71969		1.48832	37	0.000533403	0.0039803	7.16198	0.0739229	73.9428	15.2444	0.440604	0.275537	2.22283	0.0845094	1.2081	0.45745	0.140242	3.04886	36.9317	51.3982	94.9425	16.6007	0.478347	0.282343	0.335427	-0.00729546
AB08-11	2010	20.1	4.72519		1.62658	37	0.00378092	0.0170838	7.74162	0.0807434	72.1861	14.6871	0.50364	0.313318	1.72308	0.978612	0.252345	0.0567094	0.263682	4.12336	39.9896	51.7994	99.3551	16.2869	0.0596972	0.155185	0.885862	-0.00722472
AB08-11	2010.55	20.1055	4.73069		1.70602	37	-0.00313292	0.0511958	7.13688	0.0856456	85.9755	15.0393	1.12647	1.345	2.4779	0.206135	1.28325	0.540461	0.183258	3.34599	37.3137	58.6613	101.385	16.8035	0.130678	0.157571	0.524684	-0.00733583
AB08-11	2011.1	20.111	4.7362		1.36125	37	0.0171475	0.0829852	7.62896	0.0970012	58.0091	14.4969	2.85387	1.72411	1.84884	0.1204	0.155308	0.04763	0.256405	3.5791	34.9114	44.153	86.1851	14.0828	0.137071	0.33934	0.589019	0.0218359
AB08-11	2011.65	20.1165	4.7417		1.50009	37	0.016009	0.166936	7.55004	0.0816322	95.5641	14.6812	5.03474	3.96161	1.98383	0.0797546	0.497521	-0.0214913	0.171995	3.27187	34.5196	50.4649	89.506	13.9187	0.0897687	0.207172	0.785577	0.0880973
AB08-11	2012.2	20.122	4.7472		1.70938	37	0.00998987	0.184867	6.84449	0.0783889	71.0906	15.1655	4.21428	3.09294	2.48527	0.255015	0.506847	0.362855	0.195413	3.06524	34.0613	43.7438	70.7714	13.2575	0.0579565	0.63383	1.03921	0.0252402
AB08-11	2012.75	20.1275	4.7527		1.46563	37	0.00296781	0.159595	7.23235	0.0716639	77.0977	14.4723	5.12583	3.01246	2.71565	0.341679	0.24483	0.285722	0.215468	3.86666	32.4248	40.4149	62.2075	10.7081	0.15834	0.633424	1.57604	0.121925
AB08-11	2013.3	20.133	4.7582		1.42854	37	0.00767906	0.143747	7.57167	0.0797268	83.5597	15.3578	3.2474	2.42502	2.47096	0.582276	0.541887	0.141132	0.230512	3.99338	29.9621	36.1773	60.9202	9.89312	0.0977738	0.548506	1.62222	0.164922
AB08-11	2013.85	20.1385	4.7637		1.55488	37	0.0080202	0.130507	6.47835	0.0733246	72.6191	13.969	3.8302	2.35734	4.13656	0.543466	0.639061	0.147401	0.330947	1.62742	30.9139	33.264	53.2583	8.35831	0.064716	0.640314	1.62726	0.172248
AB08-11	2014.4	20.144	4.7692		1.56841	37	0.0121516	0.133172	7.73994	0.0827742	49.1189	14.869	4.03098	2.20354	3.60324	0.878259	1.21109	0.426414	0.253373	2.8149	24.6432	31.9348	46.7168	7.63971	0.186195	0.744855	2.30952	0.219182
AB08-11	2014.95	20.1495	4.7747		1.75525	37	0.0237095	0.16026	7.16537	0.0687317	48.4393	15.4595	4.01702	2.47463	2.53171	0.627934	1.17523	0.53556	0.237958	3.4063	25.7434	29.7556	55.166	8.41895	0.15215	0.771829	2.82954	0.187843
AB08-11	2015.5	20.155	4.7802		1.4851	37	0.00131044	0.18311	7.75742	0.0605944	39.6767	13.6525	6.03137	3.04242	3.74887	0.775593	1.18331	0.557903	0.341781	2.29675	24.1999	28.33	42.7115	7.24712	0.0625714	1.01033	1.73487	0.16654
AB08-11	2016.05	20.1605	4.7857		1.56412	37	0.0129167	0.214615	7.62851	0.0612887	42.4768	14.185	5.89568	3.80597	3.21155	0.952668	0.750942	0.140959	0.165541	3.27315	25.0243	31.4113	47.2513	7.5409	0.240722	1.19277	1.55615	0.0269522
AB08-11	2016.6	20.166	4.7912		1.56903	37	0.016378	0.237298	6.6709	0.0680982	36.1985	15.36	7.89136	4.33225	2.97924	0.335917	1.24679	0.637303	0.253115	2.57122	27.4368	33.2476	53.253	9.17147	0.0981671	0.939701	2.49427	0.338699
AB08-11	2017.15	20.1715	4.7967		1.50201	37	0.016115	0.250918	7.02413	0.0687825	56.714	14.1151	6.37586	3.76148	3.28558	1.45936	1.13163	0.37464	0.160061	3.02646	28.9348	35.0011	58.0406	9.8492	0.0598389	0.903848	1.59744	0.225871
AB08-11	2017.7	20.1771	4.80221		1.66055	37	0.0163936	0.20875	7.31745	0.0658213	55.3903	14.9998	5.87306	3.25793	4.46122	0.410718	0.655162	0.135604	0.138508	2.46061	31.7583	40.9672	69.6505	10.8221	0.265984	0.464979	1.77343	0.158462
AB08-11	2018.26	20.1826	4.80771		1.66391	37	0.0110911	0.167895	7.9019	0.0713995	60.1087	14.949	4.57396	2.47456	2.5173	1.0454	0.79723	0.456124	0.223606	4.29061	34.9729	45.8194	72.3045	12.8813	0.0253692	0.281524	1.17068	0.0930788
AB08-11	2018.81	20.1881	4.81321		1.705	37	0.00562415	0.13459	7.08292	0.0782771	77.8634	14.6946	2.53848	2.02476	3.47851	0.174253	0.457451	0.535568	0.286242	2.62139	33.8916	45.9175	74.937	13.3449	0.0600665	0.406525	0.705637	0.0261591
AB08-11	2019.36	20.1936	4.81871		1.57697	37	0.000893263	0.0854127	6.82551	0.0732086	54.7468	15.0873	2.80474	1.24935	3.35267	0.473623	0.659905	0.534684	0.0977221	4.14201	33.3077	45.1972	80.9592	13.4544	0.0253102	0.343362	0.889869	-0.0072574
AB08-11	2019.9	20.1991	4.82421		1.63708	37	0.0177925	0.0630612	6.90186	0.0816812	68.3788	16.4897	1.77841	0.702359	4.14236	0.303288	0.261647	0.223166	0.165568	3.41678	31.7467	44.6555	74.868	14.0913	0.0976706	0.0964018	0.34442	0.0269567
AB08-11	2020.45	20.2046	4.82971		1.77134	37	0.00425323	0.0378372	7.29658	0.0816148	50.7819	15.9907	1.55086	0.534478	9.00063	0.396159	0.208013	0.0637933	0.203027	2.62022	35.822	47.7981	71.7932	11.9245	0.300019	0.244552	0.235257	0.029246
AB08-11	2021.01	20.2101	4.83521		1.61378	37	0.0114123	0.0203741	7.23488	0.0721227	48.3697	15.1711	0.611761	0.639122	8.70119	0.0577093	-0.0186225	0.315544	0.104236	2.64363	28.397	43.1891	60.3523	10.388	0.285768	0.166278	0.191123	0.0990526
AB08-11	2021.56	20.2156	4.84071		1.66625	37	0.00923964	0.0136159	7.34421	0.0568356	37.1572	14.9449	0.190135	0.494595	14.8894	0.298884	-0.019776	0.425276	0.300031	3.27848	30.6544	38.7826	55.1157	10.3489	0.499754	0.176577	0.167961	0.0295822
AB08-11	2022.11	20.2211	4.84621		1.65658	37	0.00532486	0.00749932	6.56066	0.0575092	19.7997	18.5375	0.550956	0.342753	15.1002	0.907385	0.202286	0.148745	0.15193	2.69906	29.95	33.7072	44.7943	8.29141	0.63144	0.0336544	0.0941797	0.101129
AB08-11	2022.65	20.2266	4.85171		1.81299	37	0.0143891	0.00458291	7.04876	0.0656305	30.5083	15.3854	0.192978	0.174971	13.9371	0.0966506	-0.0200717	0.157027	0.304517	4.44315	26.6638	29.6595	50.1341	6.57503	0.706445	0.0355284	0.099424	0.0300245
AB08-11	2023.2	20.2321	4.85721		1.62113	37	0.0121614	0.00175572	6.9934	0.0525473	13.5311	15.107	0.113944	0.126805	16.8536	1.76455	0.0571491	0.426756	0.158577	3.13231	27.0625	27.7138	39.2154	6.02775	0.659068	0.39029	0.0631778	0.105554
AB08-11	2023.76	20.2376	4.86271		1.92183	37	0.0139249	0.000937077	6.86259	0.0685843	16.5259	15.8487	0.118389	0.131752	21.5573	0.0285063	-0.0206189	0.0672773	0.164763	3.41823	27.4946	27.806	37.1218	5.7716	0.643847	0.0364972	-0.00734306	-0.00857107
AB08-11	2024.31	20.2431	4.86821		1.6814	37	0.0104934	0.00147536	6.67281	0.0619733	6.65742	16.2995	-0.0413089	0.275699	15.4518	0.205437	0.219353	0.161294	0.263444	3.25421	28.6343	26.6628	34.0801	5.4479	0.725643	-0.0373029	0.029147	0.0308404
AB08-11	2024.86	20.2486	4.87372		1.77359	37	0.0125644	0.000585351	7.01197	0.0875197	11.5265	16.0808	0.0383208	-0.0121516	12.5433	0.0283454	0.0590432	0.0668976	0.0656858	2.91053	23.9319	23.7172	34.0069	5.39194	0.19252	0.0362912	0.137845	-0.00852269
AB08-11	2025.41	20.2541	4.87922		1.64266	37	0.000191974	0.00164258	6.07959	0.064111	-1.91253	14.8815	0.114564	0.173934	9.6665	0.0618314	-0.0199527	-0.0258898	0.183318	1.88185	26.6062	22.8598	33.4348	4.80942	0.187357	-0.0361008	0.0635212	0.0298465
AB08-11	2025.96	20.2596	4.88472		1.64629	37	0.0074907	0.000436839	7.21801	0.0545755	15.6295	15.6893	-0.0390716	0.0338298	6.83048	0.12737	0.131815	0.152559	0.0391377	2.61342	26.0032	21.91	33.229	4.17469	0.0669802	-0.0352825	0.0965946	0.0664463
AB08-11	2026.51	20.2651	4.89022		1.83395	37	0.0124163	-0.000464027	7.10829	0.0681748	5.51734	17.1131	0.201632	0.0363822	5.18131	-0.00700129	0.0603943	0.259709	0.192681	3.47671	25.1137	25.8065	35.2612	5.37066	0.0720337	-0.0379445	0.103882	-0.00871772
AB08-11	2027.06	20.2706	4.89572		1.6826	37	0.00569869	0.00064333	6.68518	0.0596278	7.78771	15.4393	-0.0407692	-0.0120598	4.95717	0.167829	-0.0203477	0.623161	0.235651	2.88855	25.9033	24.6632	29.1375	5.23636	0.0294985	0.0360171	0.0287662	0.0693333
AB08-11	2027.61	20.2761	4.90122		1.71994	37	0.0111393	0.000453282	6.78419	0.0837054	21.0718	15.3701	-0.0405423	0.458966	6.39168	0.0627047	-0.0202345	0.158301	0.137475	2.55112	24.0262	23.407	31.1542	5.71469	0.109669	-0.0366106	0.136043	-0.00841125
AB08-11	2028.16	20.2816	4.90672		1.70857	37	0.0157624	-0.000292427	6.80518	0.0779429	21.0605	16.0955	0.0377993	0.0821548	2.42231	0.0279597	-0.0202236	0.158216	0.185807	3.67385	27.8843	25.9304	37.0981	5.7751	0.069464	-0.0365909	-0.00720226	0.0689103
AB08-11	2028.71	20.2871	4.91222		1.70127	37	0.0110524	0.000641644	6.73502	0.0665412	29.4064	15.8435	0.111085	0.43883	2.64997	-0.0064588	0.0557148	0.0631263	0.270365	3.36094	25.3115	27.3041	38.3408	6.39817	0.0280473	0.103495	0.0273511	0.0289402
AB08-11	2029.26	20.2926	4.91772		1.68923	37	0.011341	0.00105472	7.7125	0.0735172	36.1122	15.6586	0.0371046	0.173055	2.17296	0.163739	0.0571694	0.0647744	0.229908	4.3945	26.272	29.1885	52.6242	7.71074	0.0681873	0.106197	-0.00706988	0.0296957
AB08-11	2029.81	20.2981	4.92322		1.54958	37	0.00614507	0.00597879	6.96726	0.0693178	33.6148	14.8731	0.10971	0.0776202	1.89432	0.157598	0.129158	0.323759	0.198418	4.38141	30.965	28.7279	44.5829	8.50041	0.520786	0.0338215	0.0270126	-0.00794271
AB08-11	2030.36	20.3036	4.92872		1.77202	37	0.00101383	-0.000925481	7.23746	0.0677795	57.3947	15.7707	0.113774	0.172736	3.12303	0.0614055	0.0570639	0.0646549	0.205769	2.34092	31.3135	35.642	52.4149	9.10125	0.0287265	0.0350745	-0.00705683	-0.00823697
AB08-11	2030.91	20.3091	4.93422		1.78776	37	-0.000225473	-0.00116183	7.48505	0.0756488	62.2018	15.3763	0.194423	0.176281	2.14391	0.0626657	-0.0202219	0.158203	0.16159	3.51298	26.9652	35.2539	60.3724	10.4553	-0.0108262	0.0357944	0.0285883	-0.00840602
AB08-11	2031.46	20.3146	4.93973		1.57557	37	-0.0013769	0.00110789	7.5584	0.0649849	55.2526	14.6826	-0.0374471	0.0759236	2.55997	0.122074	0.198847	-0.024251	0.126979	3.84042	26.6167	33.8928	62.0546	10.1674	-0.0100059	0.0330822	0.0264222	-0.0077691
AB08-11	2032.01	20.3201	4.94523		1.81769	37	0.013734	-0.000668867	6.70633	0.0772252	71.0699	16.5512	0.195523	0.129946	2.50575	0.0281156	-0.0203363	0.344583	0.186843	3.53285	28.2444	38.9061	64.6366	11.2164	0.110221	0.254372	0.100735	-0.00845359
AB08-11	2032.56	20.3256	4.95073		1.67744	37	0.0155705	0.00075445	7.48006	0.0781217	79.3878	17.7403	0.114705	0.267143	2.11798	0.0276192	0.0575305	0.429605	0.0879111	2.67733	28.2493	39.4725	60.5491	11.8083	0.068618	-0.0361453	-0.00711454	0.0298833
AB08-11	2033.11	20.3311	4.95623		1.67643	37	0.0061643	-0.000600729	6.62555	0.0662842	65.8372	14.8951	0.110053	0.0778632	1.63657	1.17793	-0.0191671	0.0625402	0.130223	2.72095	26.2348	36.3862	59.6161	10.5835	0.0277869	-0.0346795	-0.00682603	-0.00796757
AB08-11	2033.66	20.3366	4.96173		1.77672	37	0.00267593	-0.00080715	7.34214	0.09396	52.8828	15.4205	-0.0398755	0.127168	1.90462	0.0275146	-0.0199017	-0.0258236	0.159031	4.24749	27.6407	38.7351	63.3689	11.0891	0.107865	-0.0360085	-0.00708761	-0.0082729
AB08-11	2034.21	20.3421	4.96723		1.67903	37	0.00273312	-0.00110554	7.0141	0.0745078	74.6854	15.5739	0.116713	0.082575	2.4347	0.0629915	-0.020327	0.159025	0.186757	3.69265	30.7916	35.062	61.6091	10.4714	-0.0108824	-0.0367781	0.0287369	-0.00844972
AB08-11	2034.76	20.3476	4.97273		1.82635	37	0.01335	0.00152232	6.77561	0.0670714	60.2939	15.5814	-0.0408638	0.177789	1.7414	0.0281966	-0.0203949	0.159556	0.187381	3.70498	29.5593	33.0717	57.881	9.57221	-0.0109188	0.0361006	0.0288329	-0.00847795
AB08-11	2035.31	20.3531	4.97823		1.82266	37	0.0147919	-0.00177539	7.07233	0.074684	79.3573	15.4763	0.122008	0.0368634	2.91054	0.10232	-0.0212491	0.0693335	0.24609	3.5227	32.0815	40.7307	61.0283	10.0798	0.0729865	0.0376126	0.0300405	-0.00883303
AB08-11	2035.86	20.3586	4.98373		1.67033	37	0.010953	0.000262355	7.4131	0.0778046	50.4758	15.3811	-0.0398645	-0.0117922	2.04096	-0.00664223	-0.0198962	0.0649191	0.111365	4.40431	27.1326	35.9342	50.1464	9.1883	-0.0106518	0.106434	0.0281279	0.14386
AB08-11	2036.41	20.3641	4.98923		1.71282	37	0.0056184	0.00377857	6.38247	0.0894185	53.3063	15.8424	0.0374955	0.128187	2.95479	0.234328	-0.020061	0.339919	0.184314	2.84785	26.4478	29.1997	48.9696	8.69808	0.0290828	-0.0362968	0.0283609	-0.00833916
AB08-11	2036.96	20.3696	4.99473		1.75688	37	0.00627746	-0.000269731	6.6388	0.079632	49.193	16.0721	0.119812	0.0362	2.5711	0.709335	0.0600919	0.0680857	0.0668524	2.96222	27.72	32.9128	46.2036	8.53687	-0.0111714	0.186316	0.0294999	-0.00867406
AB08-11	2037.51	20.3751	5.00023		1.82872	37	-0.00112345	0.000704335	6.82156	0.0762444	74.2175	16.3678	0.121938	-0.0125869	2.03242	0.175163	0.473135	0.166144	0.11887	2.17162	25.2166	31.4597	50.2747	8.64845	0.115102	0.113607	0.06761	-0.00882799
AB08-11	2038.06	20.3806	5.00573		1.77248	37	-0.00898371	-0.000336321	6.48475	0.0723279	55.8789	15.2772	0.202185	0.0854276	2.22951	0.17345	0.142149	0.54813	0.117707	2.65133	22.2166	25.1019	41.7941	7.75921	0.0722313	0.0372234	0.253043	-0.00874162
AB08-11	2038.61	20.3861	5.01124		1.80209	37	0.000200929	-0.000590479	7.06565	0.0611977	51.7311	15.7395	-0.0418426	-0.0123773	3.14775	0.566529	0.141164	0.258616	0.141884	1.47216	22.1677	24.0032	40.7938	6.67073	-0.0111803	0.186466	0.731779	0.0312389
AB08-11	2039.16	20.3916	5.01674		1.79623	37	0.012725	-0.000805782	7.57426	0.0569118	39.0977	15.4394	0.123408	0.087312	0.874215	0.324836	-0.0214931	0.364184	0.146026	4.41648	20.6507	20.4237	30.5343	5.14032	-0.0115067	-0.0388879	0.220584	-0.00893444
AB08-11	2039.71	20.3971	5.02224		2.05295	37	0.0125717	0.00122448	7.7391	0.0695452	23.2944	16.1321	0.0443569	0.0411708	1.8631	0.277208	0.160419	-0.0307937	0.218041	3.18053	19.5753	18.264	25.2437	4.90202	-0.0127054	-0.0429388	0.53758	-0.00986515
AB08-11	2040.26	20.4026	5.02774		1.89901	37	-0.0127619	0.000368125	6.82544	0.0586812	42.5017	16.3337	0.337304	0.218015	1.53331	0.978932	0.751239	0.0816026	0.169916	4.14606	18.2366	14.8221	24.3355	3.89602	-0.0133892	0.939451	1.05341	0.0374106
AB08-11	2040.81	20.4081	5.03324		1.76952	37	0.00909231	0.00486935	6.55422	0.0427992	56.5535	15.6015	0.511296	6.34124	1.59885	6.88194	2.58717	0.530844	0.308984	3.69974	15.5681	13.5715	17.8561	2.93012	0.0295251	1.93141	1.86746	-0.00846596
AB08-11	2041.36	20.4136	5.03874		1.79508	37	0.00906232	0.0119026	7.30968	0.0374178	25.9984	15.6245	1.0676	16.2459	1.0304	13.115	5.23306	0.870101	0.33406	3.09317	14.8659	11.2085	15.3075	2.03716	-0.00953241	3.79237	2.57804	0.0606704
AB08-11	2041.91	20.4191	5.04424		1.75047	37	0.00959048	0.0110284	6.33107	0.043503	7.70979	14.8215	0.977096	26.0919	0.948251	16.9359	5.79603	1.56636	0.389399	3.44142	12.6157	10.7099	13.8923	1.65473	0.129003	4.89532	2.89271	0.0926626
AB08-11	2042.46	20.4246	5.04974		1.78741	37	0.0143509	0.00888785	8.1134	0.0333407	10.635	15.5692	0.841202	33.9376	2.46095	21.2535	7.90826	1.26948	0.400189	3.13603	12.6507	10.1653	10.6918	2.08135	0.0274239	6.39962	3.64325	0.0644572
AB08-11	2043.01	20.4301	5.05524		1.73084	37	0.0122131	0.00846897	7.03676	0.0376634	16.6688	14.7038	0.594077	32.8662	1.73069	20.7849	6.71826	1.29609	0.296006	3.8596	13.6418	11.1175	13.9081	1.69505	0.0621156	7.60742	3.57893	0.0961893
AB08-11	2043.56	20.4356	5.06074		1.72026	37	-0.00315808	0.0069345	6.9873	0.0430826	13.1936	13.8005	0.171033	28.7596	2.4978	18.5177	6.0565	0.707055	0.206019	3.09035	11.9862	8.96959	11.0616	1.79	-0.00952372	4.29831	2.41827	-0.00739474
AB08-11	2044.11	20.4411	5.06624		1.75572	37	0.00251178	0.00504101	6.846	0.038906	22.8065	14.8167	0.396642	23.0114	1.65929	14.0811	4.98229	0.401725	0.238702	4.28361	13.9039	10.3138	10.4527	1.89143	0.0270819	4.78123	2.20886	0.0993628
AB08-11	2044.66	20.4466	5.07174		1.77529	37	0.0193923	0.0037555	7.75983	0.0507724	38.1357	16.5567	0.363937	18.7861	1.35741	11.8744	4.61525	0.642043	0.393327	2.8096	14.0201	12.6564	16.7177	2.74022	0.0720081	3.03869	2.10782	-0.00871462
AB08-11	2045.21	20.4521	5.07725		1.80478	37	0.0100769	0.00210692	7.17843	0.0603617	32.7825	23.2653	0.541468	14.402	2.43497	8.39972	3.07456	0.267092	0.327217	3.91807	16.5954	12.1461	16.0989	2.60291	0.116896	2.19978	1.02297	0.0322627
AB08-11	2045.76	20.4576	5.08275		1.69817	37	0.0144073	0.00208794	6.62001	0.0616537	42.5392	14.4487	0.565973	8.947	1.86916	4.41949	1.34445	0.33094	0.226194	3.39298	14.9299	14.5994	18.1192	3.42208	0.0283146	1.29295	0.338719	0.0665508
AB08-11	2046.31	20.4631	5.08825		1.71458	37	0.00741158	0.000521275	6.88209	0.064905	43.178	13.9583	0.0360627	5.10897	3.30639	3.63704	1.17844	0.678895	0.269635	2.12619	14.3606	12.7152	16.26	2.49778	0.0279715	0.793841	0.368762	-0.0080205
AB08-11	2046.86	20.4686	5.09375		2.10415	37	0.00366164	0.00337506	7.12799	0.0766504	70.2176	15.5777	0.119456	2.65143	2.34881	2.17164	0.947813	0.732035	0.240943	1.63181	18.8367	15.0907	18.4762	3.56702	0.030161	0.632573	0.139877	0.0311211
AB08-11	2047.41	20.4741	5.09925		1.8554	37	0.0217029	0.000614512	8.32251	0.0801147	70.0699	16.2025	-0.043126	2.14142	3.46637	1.87692	0.730055	0.364707	0.146236	2.20097	17.5374	19.4215	22.1627	3.23156	0.0739306	0.346271	0.144713	-0.00894729
AB08-11	2047.96	20.4796	5.10475		1.77933	37	0.0145018	-0.000269289	7.36698	0.0881439	80.2939	15.9642	0.280971	1.3938	2.85348	0.672416	0.383297	0.0679742	0.191401	2.62652	18.0233	14.5737	21.2148	3.24535	-0.0111531	0.335147	0.0294515	-0.00865985
AB08-11	2048.51	20.4851	5.11025		1.75301	37	0.00645486	-0.000844776	7.82204	0.100436	65.3384	15.989	0.115241	0.828964	3.09425	0.268888	0.0577992	0.157019	0.208421	2.37109	12.9174	12.4866	20.098	3.27755	0.0689385	0.0355265	0.134941	-0.00834312
AB08-11	2049.06	20.4906	5.11575		1.7593	37	-0.00191769	-0.000199893	7.92587	0.0782576	70.9613	15.8194	-0.0406841	0.177008	2.50192	0.237181	0.137255	0.344057	0.210858	2.39881	17.4639	12.2586	17.1119	2.6668	-0.0108708	0.181303	0.136519	0.0691886
AB08-11	2049.61	20.4961	5.12125		1.69974	37	0.00527111	-0.000156422	7.12774	0.0806959	70.2892	15.2381	0.0351778	0.207875	1.8012	0.122932	-0.018821	-0.0244214	0.105347	2.82126	14.4818	12.0565	16.1807	2.77858	-0.0100762	-0.0340532	-0.00670276	0.0641311
AB08-11	2050.16	20.5016	5.12675		1.81988	37	0.00234549	-0.0010585	7.72495	0.0849587	70.8665	16.1397	0.0385614	0.22787	2.25827	0.2764	0.059414	-0.0267703	0.238935	2.60115	12.4478	11.0867	19.4903	2.95535	0.111819	0.036519	0.0656816	0.0308617
AB08-11	2050.71	20.5071	5.13225		1.77199	37	0.0107062	-1.27141e-05	7.72805	0.0801785	45.2278	15.8118	-0.0404941	0.0821014	2.28172	0.0626302	-0.0202104	0.158113	0.113124	2.54809	14.7373	12.2758	13.4837	3.02169	0.0694189	0.108115	-0.00719758	-0.00840126
AB08-11	2051.26	20.5126	5.13775		1.85228	37	0.00727875	-0.000843629	8.10584	0.0844238	94.051	15.9542	0.0374625	-0.0118794	1.50458	0.0965142	-0.0200433	0.156806	0.208138	2.20872	15.9276	14.7607	18.3674	2.78322	0.0688449	0.0354783	0.0283359	-0.0083318
AB08-11	2051.81	20.5181	5.14325		1.62177	37	0.0156788	-0.000513994	7.3739	0.0690308	64.6161	14.3535	-0.0364227	0.0738467	2.05231	0.118735	-0.0181784	0.0593142	0.232283	2.00321	15.1774	11.5779	13.7747	2.49009	0.0263536	-0.0328906	-0.00647391	0.0271925
AB08-11	2052.36	20.5236	5.14876		1.75862	37	0.00873338	-0.000823374	6.75016	0.0846098	96.474	16.0108	0.112321	-0.0115942	2.14124	-0.00653069	0.663511	0.331465	0.0860841	2.31102	15.4467	13.1798	17.9265	3.07195	0.0283595	0.0346265	-0.00696669	-0.00813176
AB08-11	2052.91	20.5291	5.15426		1.7775	37	0.00596434	-0.00132178	7.66592	0.087247	66.9139	15.8959	0.037056	0.865002	1.89737	0.197553	0.0570945	0.0646896	0.158426	2.49961	15.7548	16.135	25.9186	3.94611	0.0287419	0.0350934	0.0280284	-0.0082414
AB08-11	2053.46	20.5346	5.15976		1.7847	37	0.0152202	-0.000132354	7.5985	0.0852003	92.8002	15.5792	0.0364989	0.170231	2.47329	0.0605148	-0.0195278	0.0637171	0.0625629	2.46203	15.7144	15.4608	20.9928	3.78879	-0.0104546	0.104464	0.0276071	0.029211
AB08-11	2054.01	20.5401	5.16526		1.81683	37	-0.00228696	-0.000561246	8.02748	0.0851059	76.5054	16.5045	-0.0397711	0.0806354	2.17271	0.538482	0.211187	0.0647669	0.182371	2.66021	19.3712	18.277	26.062	4.51072	0.0287763	-0.0359142	0.273979	-0.00825125
AB08-11	2054.56	20.5456	5.17076		1.77622	37	0.00386747	-0.00037461	7.38331	0.0846398	59.281	17.2776	0.112852	0.766036	3.3681	1.37656	-0.0196546	0.0641307	0.110013	2.63408	17.9932	19.4014	27.1424	4.89777	0.0284936	-0.0355614	0.0625722	-0.00817019
AB08-11	2055.11	20.5511	5.17626		1.63167	37	0.00368341	-0.000738887	6.62985	0.0773861	70.3244	13.8183	0.0316469	0.108192	3.30973	0.0524702	-0.0169318	0.132464	0.155564	2.67253	18.3999	15.0908	22.3269	4.29355	-0.00906477	-0.0306351	-0.00602997	0.0253278
AB08-11	2055.66	20.5566	5.18176		1.88206	37	-0.00268133	1.78296e-05	7.93786	0.0767353	63.01	16.5737	0.189575	0.0342066	3.03984	0.0272603	0.0567829	0.244179	0.251951	2.01626	19.6394	16.4108	29.4643	4.81454	0.146009	0.0349019	-0.00702209	0.029495
AB08-11	2056.21	20.5621	5.18726		1.86166	37	-0.00511324	-0.000734971	7.53236	0.0925562	62.6478	15.9062	0.112563	0.490302	11.7908	0.161697	0.0564565	0.153371	0.0862699	1.69333	16.9607	19.4247	24.518	4.57793	0.378667	-0.0354705	0.131806	0.0668002
AB08-11	2056.76	20.5676	5.19276		1.93832	37	0.00450556	0.000432203	7.57742	0.0677213	42.6312	16.265	-0.0414973	0.0841353	14.5236	0.206374	0.0596438	0.0675781	0.0663539	2.44676	15.9361	15.7866	26.1367	4.2391	0.400045	0.0366603	0.0659357	0.0309811
AB08-11	2057.31	20.5731	5.19826		1.69485	37	0.0156254	-0.00159025	7.8721	0.0719187	25.514	16.2876	-0.0381355	0.165919	18.5229	0.451	0.0548119	-0.0246968	0.152092	2.24854	14.6451	13.4552	17.7651	3.23945	0.329854	0.0336904	0.0605941	0.174004
AB08-11	2057.86	20.5786	5.20376		2.72999	37	0.0102336	-0.000784632	8.40215	0.0638487	22.1415	16.5561	0.0375807	1.01764	17.9064	-0.00671247	0.057903	0.157301	0.256921	2.21569	14.3581	10.7306	16.0338	2.64071	0.308542	0.179529	0.0284253	0.106947
AB08-11	2058.41	20.5841	5.20926		1.79151	37	0.00884079	0.000291486	6.76055	0.0576578	15.8717	15.997	0.113702	1.64754	10.2749	0.0613666	0.0570278	0.154923	0.110842	1.86771	12.3465	9.03582	15.343	2.16643	0.303878	0.247698	0.0630437	0.0674761
AB08-11	2058.96	20.5896	5.21477		1.71965	37	0.0133642	0.00205005	6.90025	0.0556853	22.7591	14.788	-0.0373515	3.85103	10.9556	0.0257731	-0.018642	0.145842	0.126655	1.61021	11.529	8.9869	10.9587	1.96937	0.360079	0.0997249	0.224317	0.0635211
AB08-11	2059.51	20.5951	5.22027		1.648	37	0.0136907	0.00314392	6.94028	0.0482059	22.9352	13.5407	0.164498	6.4829	8.28904	0.141119	0.182034	0.0558263	0.116243	1.61369	9.97856	7.23905	13.8375	1.79675	0.160659	0.520218	0.115032	0.0255935
AB08-11	2060.06	20.6006	5.22577		1.56866	37	0.00621962	0.00470072	5.94124	0.0482549	11.6779	12.8962	0.0320113	8.04493	8.35636	0.258847	0.0493218	0.212095	0.0138769	2.43131	8.60896	7.94102	10.4559	1.5624	0.0928255	0.275531	0.175773	0.0256194
AB08-11	2060.61	20.6061	5.23127		1.56837	37	0.00995039	0.00697541	5.82672	0.0479661	0.446914	13.809	0.035108	8.82317	5.02832	0.187167	0.272723	0.146951	0.037699	2.66651	10.4814	8.98599	11.2546	1.58408	0.176379	0.503887	0.226022	0.0640037
AB08-11	2061.16	20.6116	5.23677		1.58305	37	0.00137184	0.00453032	6.80217	0.0641513	24.423	13.6216	-0.0382099	7.75855	3.33358	0.222757	0.350876	0.236164	0.0839203	2.25293	10.5455	7.64722	14.5586	1.93087	0.0276467	0.170277	0.19572	-0.00792736
AB08-11	2061.71	20.6171	5.24227		1.61175	37	0.0091637	0.00484007	8.20814	0.0611751	43.8918	13.9632	-0.039298	7.20297	2.48414	0.296428	0.132579	0.153443	0.180201	1.07115	11.3393	11.0455	14.0848	1.83839	-0.0105004	0.24533	0.201294	-0.0081531
AB08-11	2062.26	20.6226	5.24777		1.57867	37	0.0162326	0.0011721	6.55681	0.0545938	39.5173	13.8833	-0.0396176	5.00556	2.50434	0.0952122	0.287087	0.15469	0.0870119	1.23687	10.934	8.87657	12.5191	2.23751	0.0286652	0.388876	0.062949	-0.0082194
AB08-11	2062.81	20.6281	5.25327		1.60836	37	0.00273773	0.00176988	6.98858	0.0692602	51.6557	13.7498	0.11691	4.06403	2.22872	0.0630976	0.137634	0.25215	0.162704	2.40543	12.7972	10.1908	14.1608	2.67416	0.0295181	0.181803	0.100859	0.0304577
AB08-11	2063.36	20.6336	5.25877		1.67782	37	0.0175785	0.00136636	7.02736	0.0840294	60.49	15.337	0.11991	3.19619	2.57322	0.279784	-0.0208839	-0.0270981	0.266853	2.13551	13.9663	12.1463	15.1154	2.62504	0.071732	0.0369661	0.0664857	-0.0086812
AB08-11	2063.91	20.6391	5.26427		1.78853	37	-0.0108653	0.00050996	6.98263	0.0716266	48.9233	16.1524	0.287177	1.77149	4.38183	0.0659836	-0.0212926	0.263683	0.144664	1.50101	14.7764	11.9126	18.789	2.74311	0.157671	0.113904	0.0677869	0.0725528
AB08-11	2064.46	20.6446	5.26977		1.82829	37	-0.00114315	0.00191185	7.76064	0.0735062	75.5193	15.6297	-0.0432973	1.14401	2.43967	0.104056	0.146072	-0.0280396	0.146817	2.20971	12.9293	12.09	17.844	2.56718	-0.011569	0.192949	0.03055	0.0323249
AB08-11	2065.01	20.6501	5.27527		1.75694	37	0.00965546	-0.00172667	7.86434	0.091722	105.627	15.6394	0.0386262	0.901655	3.32819	0.0995123	0.0595138	0.0674307	0.140407	1.62093	10.8039	11.4098	15.7767	2.62354	0.153031	0.184524	0.0292161	-0.00859062
AB08-11	2065.56	20.6556	5.28077		1.73884	37	0.0128188	-0.000106069	7.69664	0.0802373	42.8411	14.9962	-0.0405238	0.599981	3.39634	-0.00675209	0.136715	0.250465	0.185822	1.74696	10.9806	11.6143	18.1906	2.94788	-0.010828	0.0358003	0.0285931	0.0302543
AB08-11	2066.11	20.6611	5.28628		1.89557	37	0.000198335	-0.000519639	7.40305	0.0732271	63.4073	16.3378	-0.0413023	0.323634	2.82352	0.0284992	0.139341	0.255277	0.0660422	1.61684	14.5128	12.3689	19.8239	3.39222	0.111725	0.110273	0.0291424	-0.00856894
AB08-11	2066.66	20.6666	5.29178		2.00546	37	0.00558723	-0.000675346	7.44851	0.0720798	77.8821	17.1887	0.123723	0.288146	2.72914	0.103759	0.229257	0.0703084	0.172186	1.3479	14.0851	15.1535	22.3093	4.39687	0.116787	0.11527	0.0304629	-0.00895722
AB08-11	2067.21	20.6721	5.29728		1.97837	37	0.0043098	-0.000552126	7.93286	0.0897813	72.6125	17.1838	0.0409374	0.292888	4.28137	-0.00731203	0.0630749	-0.0284198	0.122596	3.63102	17.2948	16.7754	29.8747	4.44179	0.0752309	-0.0396287	0.0309643	-0.00910465
AB08-11	2067.76	20.6776	5.30278		1.82769	37	0.0014687	-0.000200991	7.78211	0.0836914	84.799	15.2655	-0.0409078	0.225501	2.2348	0.0983129	0.0587965	0.066618	0.0898456	1.76352	18.3828	16.2399	25.5342	4.5373	0.0295987	0.0361395	-0.0072711	-0.00848707
AB08-11	2068.31	20.6831	5.30828		1.8441	37	0.0180033	-0.00151965	7.68785	0.0957943	71.6986	15.3622	0.0390142	0.133378	7.38322	-0.00696851	-0.0208735	0.258494	0.0668743	1.47147	17.8477	19.5274	29.1802	5.00523	-0.011175	-0.0377669	-0.00743373	0.031224
AB08-11	2068.86	20.6886	5.31378		1.82902	37	0.0135749	-0.000522784	8.06961	0.0869617	88.6163	16.6731	-0.0415523	0.229054	2.12736	-0.00692344	-0.0207385	0.162245	0.190538	2.12065	17.2105	16.9542	25.9365	4.97286	0.0712328	-0.0375227	0.0660231	0.070665
AB08-11	2069.41	20.6941	5.31928		2.01627	37	0.00947758	-0.000632802	8.32552	0.0930223	95.7921	15.753	-0.042535	0.481525	2.3237	0.648778	0.0611354	0.166082	0.0680133	1.49653	14.1971	17.4334	28.9561	4.46494	0.0307761	-0.0384101	-0.00756034	0.0317558
AB08-11	2069.96	20.6996	5.32478		1.78076	37	0.0141357	-0.000860478	7.57609	0.103504	91.3337	14.9162	0.0368546	0.355466	2.56521	-0.00658279	-0.0197181	0.334109	0.0395746	2.32945	13.5846	16.0473	19.2985	3.59087	-0.0105565	-0.0356764	0.0278761	-0.00819662
AB08-11	2070.51	20.7051	5.33028		1.69768	37	0.0103289	-0.000730994	6.78776	0.08691	77.4842	14.5559	0.111954	0.169973	3.20719	0.261221	-0.0194982	0.152541	0.109138	2.76796	14.8066	14.4311	18.751	3.11079	0.028267	0.0345135	-0.00694395	-0.00810521
AB08-11	2071.06	20.7106	5.33578		1.77492	37	-0.00149115	-0.000106149	7.43	0.0856387	81.6444	15.7768	0.116216	0.977308	2.00666	0.027983	0.0582884	0.158348	0.113292	1.58755	15.8805	12.5923	18.0897	2.91204	0.0293429	-0.0366214	-0.00720826	-0.00841372
AB08-11	2071.61	20.7161	5.34128		1.83973	37	0.00972898	0.00145611	7.53158	0.0970938	69.0894	15.5601	0.0357277	1.7683	1.69788	0.0264273	0.277537	-0.0248031	0.12987	1.4993	11.5331	9.9903	14.5928	2.52248	0.0277116	0.102256	-0.00680753	-0.00794598
AB08-11	2072.16	20.7216	5.34678		1.61383	37	0.020069	0.00448224	7.04053	0.0747536	54.2258	14.5821	-0.0383013	3.50403	2.55262	0.0592386	0.0550502	0.149551	0.198508	3.16906	10.186	9.70904	12.6453	1.672	-0.0102341	0.239108	0.0946902	-0.00794631
AB08-11	2072.71	20.7271	5.35229		1.58332	37	0.010143	0.00587353	6.59531	0.0597208	54.3142	13.6396	0.109939	7.70065	1.89827	0.125063	-0.0191472	-0.0248446	0.0384286	1.19773	9.8172	8.66618	10.28	1.55476	-0.0102508	0.719246	0.0270689	-0.00795927
AB08-11	2073.26	20.7326	5.35779		1.48462	37	0.00617756	0.0113665	5.69636	0.0501571	28.5042	11.4443	0.0337238	11.6279	1.16827	0.0559136	0.0519603	0.141157	0.0362126	1.84502	7.25281	6.70353	7.94966	1.26151	-0.00965966	0.936103	-0.0064257	-0.0075003
AB08-11	2073.81	20.7381	5.36329		1.12919	37	0.00750318	0.0146538	4.4122	0.046084	29.5671	9.98755	-0.033674	18.3122	1.37721	0.0520819	0.178812	-0.0218075	0.0136174	0.917859	5.06442	4.94339	5.59702	0.838105	-0.00899769	0.871952	0.0237599	-0.0069863
AB08-11	2074.36	20.7436	5.36879		1.02042	37	0.00335129	0.0203988	3.91253	0.0332467	16.0427	7.89757	0.148113	23.2522	1.26238	-0.00514293	-0.0154052	0.0502654	0.0862278	1.2083	6.11495	3.62322	5.74084	0.497875	-0.00824744	1.1301	0.0217788	-0.00640377
AB08-11	2074.91	20.7491	5.37429		0.93875	37	0.00875533	0.0219225	2.89235	0.0173242	25.1288	6.62138	-0.027678	25.2345	1.08448	0.0190982	0.0397815	-0.0179245	0.0277249	0.644735	4.09314	2.53605	2.87906	0.515688	0.0474483	1.01337	0.117325	-0.00574232
AB08-11	2075.46	20.7546	5.37979		0.790236	37	0.00371215	0.0231472	2.87237	0.0258585	2.69415	5.89899	-0.0265572	25.1717	0.903804	0.223073	0.192446	-0.0171986	0.0107394	0.723875	3.25978	2.67798	3.21272	0.536327	-0.00709608	0.877444	0.159491	-0.00550979
AB08-11	2076.01	20.7601	5.38529		0.85452	37	0.00422246	0.022513	3.23883	0.0228886	7.05122	6.17416	0.134946	24.8532	0.522621	0.0194048	0.0404201	0.109806	0.0113724	0.32073	4.51197	2.52506	4.51533	0.69993	-0.00751427	0.476999	0.0943666	-0.0058345
AB08-11	2076.56	20.7656	5.39079		0.814024	37	0.00622227	0.0229942	3.49812	0.0260385	9.9669	7.22907	0.0839304	21.6884	0.644829	0.120566	0.0420955	0.0476953	0.0293376	0.798309	4.55189	2.8995	4.28871	0.683151	0.0502083	0.653737	0.279375	0.049808
AB08-11	2077.11	20.7711	5.39629		1.02388	37	0.0113404	0.0176977	4.65614	0.0325968	13.2415	8.17408	0.0287343	18.5074	11.3099	0.100415	0.103919	0.0501622	0.0676522	1.3279	4.55526	3.72905	5.29387	0.776278	-0.00823051	0.742578	0.321034	0.0229968
AB08-11	2077.66	20.7766	5.40179		1.04858	37	0.00580691	0.0169763	4.55946	0.0320988	12.8162	9.0417	0.215665	14.5899	1.03536	0.0769981	0.170128	-0.0207485	0.0703665	0.61934	4.73802	4.17319	5.50627	0.887571	0.0231815	0.600664	0.390516	0.0239195
AB08-11	2078.21	20.7821	5.40729		1.30217	37	0.0122678	0.0244984	5.55019	0.0369162	26.2444	11.0525	0.252773	10.506	1.40687	0.18675	0.272115	0.0611522	0.127333	1.47	6.21339	4.20084	4.64883	1.11074	0.0271702	0.435679	1.0216	0.0280351
AB08-11	2078.76	20.7876	5.41279		1.46723	37	0.00688938	0.0379788	6.38373	0.0480878	20.8911	13.0344	1.50485	7.85107	1.88082	0.872828	0.201841	-0.0246162	0.0607794	1.18671	6.95766	3.76307	6.85491	0.981707	0.140481	1.25588	1.60491	0.0283783
AB08-11	2079.31	20.7931	5.4183		1.62508	37	-0.00223873	0.0615735	6.01569	0.0386396	16.7362	13.9584	3.04633	6.95505	2.99564	0.360372	1.036	0.417857	0.085507	2.14123	5.85525	3.7827	4.26975	0.859291	0.105314	1.91228	2.8478	0.0662095
AB08-11	2079.86	20.7986	5.4238		1.76468	37	0.0155362	0.0801222	7.08556	0.0501516	26.7206	14.8986	3.04789	6.16011	2.73032	0.60918	0.908115	0.42866	0.206996	1.2469	5.90634	3.51262	5.17011	1.01901	0.147606	1.10552	4.12163	0.106025
AB08-11	2080.41	20.8041	5.4293		1.69404	37	0.00939435	0.0885641	6.77238	0.0404563	28.1096	14.709	4.43543	5.63566	5.68317	0.984842	1.54926	0.677374	0.199913	1.66283	6.28544	4.52779	4.23026	0.598051	0.295416	1.89459	4.15095	0.212796
AB08-11	2080.96	20.8096	5.4348		1.91434	37	0.0204915	0.0845939	7.05746	0.0402831	17.9908	16.9157	3.74034	5.03199	5.82918	0.797505	1.79794	0.953814	0.226046	2.61583	6.86374	4.44683	4.95199	1.05894	0.609482	1.57156	5.66014	0.25306
AB08-11	2081.51	20.8151	5.4403		1.8582	37	0.000590826	0.0853181	6.70791	0.0650275	30.7106	14.8813	3.64996	4.51398	5.67194	1.29477	1.71526	0.506697	0.225134	1.52475	6.93386	5.28821	7.0242	1.20082	0.336897	2.40021	4.36361	0.437839
AB08-11	2082.06	20.8206	5.4458		2.03569	37	0.0228046	0.0644112	7.42394	0.0556816	30.0387	15.6396	2.40953	3.94457	6.10605	0.637887	1.51375	0.154611	0.0396641	2.49165	7.14854	3.92009	7.14094	1.4808	0.342496	1.23754	3.6313	0.21845
AB08-11	2082.61	20.8261	5.4513		1.73394	37	0.0134153	0.0407502	6.76492	0.0622075	17.8509	14.0022	2.14689	2.36005	3.36729	0.805503	0.96964	0.474027	0.167089	2.00407	8.68395	7.02471	9.04238	1.67044	0.0985675	1.13882	2.47226	0.16626
AB08-11	2083.16	20.8316	5.4568		2.04822	37	0.0147363	0.0297748	7.39197	0.0708347	55.1014	15.3644	1.23992	2.33946	4.26465	0.493615	0.960305	0.417721	0.0854793	1.21509	11.1324	8.50556	15.49	2.57549	0.10528	0.660141	2.09054	0.103319
AB08-11	2083.71	20.8371	5.4623		1.90224	37	0.00268606	0.0181576	7.321	0.0860282	71.0091	15.4507	0.888351	1.33656	3.63015	0.370498	0.52257	0.0651827	0.111818	0.615122	12.2541	10.8086	16.0435	2.62369	0.108273	0.249878	1.90249	0.0298829
AB08-11	2084.26	20.8426	5.4678		1.90115	37	0.0186082	0.0105272	7.19664	0.0803657	60.37	16.4544	0.334211	1.28805	3.2991	0.158791	0.42891	0.150614	0.0616791	2.27438	12.4874	11.7645	18.9513	3.15593	0.295427	0.44754	0.913123	0.0655995
AB08-11	2084.81	20.8481	5.4733		1.91973	37	0.00999643	0.00976146	7.63256	0.0874427	75.4192	15.5596	0.526197	0.83452	29.5536	0.0562715	0.334099	0.307682	0.123371	1.42426	11.4127	11.2302	15.714	3.23858	1.07167	0.357125	0.572019	0.27014
AB08-11	2085.36	20.8536	5.4788		1.95449	37	0.0173964	0.00417841	6.97262	0.0916251	91.6226	15.4144	0.326479	0.339032	40.0702	0.0905586	0.273056	0.0613636	0.127773	1.32575	10.4942	11.9087	17.8729	3.31881	0.848581	0.100605	0.359437	0.27978
AB08-11	2085.91	20.8591	5.4843		1.94996	37	0.0102631	0.00335149	7.81141	0.0984082	74.6723	15.9289	0.111241	0.259075	26.2598	-0.00646788	0.0557931	0.151569	0.06207	0.750394	13.8349	13.9102	18.6315	3.30957	0.720348	0.172988	0.267414	0.177118
AB08-11	2086.47	20.8647	5.48981		1.81215	37	0.0134057	0.0014961	7.3829	0.0923096	71.1319	15.007	0.174727	1.00439	25.4462	0.118702	0.475388	0.390811	0.0799726	1.56973	12.8861	11.2393	18.301	4.02732	0.783933	0.0972177	0.122185	0.305099
AB08-11	2087.01	20.8702	5.49531		2.00672	37	0.0162649	4.71019e-05	8.52443	0.0992458	91.8284	16.2066	0.0361167	0.348349	17.8741	0.0930471	0.130618	0.415542	0.108159	2.28281	13.507	14.444	18.0358	3.8703	0.488315	0.10337	0.0615176	0.0658427
AB08-11	2087.57	20.8757	5.50081		1.91488	37	0.0151892	0.000687765	8.54822	0.0957037	123.162	16.4926	0.0354791	0.38638	10.5027	0.058824	0.201959	0.148504	0.128967	2.09178	10.9743	12.8591	17.5025	3.17129	0.328969	0.16949	0.0604316	0.137251
AB08-11	2088.11	20.8812	5.50631		1.88997	37	-0.00251566	0.00328558	7.80976	0.0988512	107.844	16.0887	0.392789	0.376553	9.85315	0.0255759	0.0532745	0.0603614	0.0371285	1.3041	10.2297	10.7595	16.8479	2.61519	0.0635417	0.0327454	-0.00658822	0.0276726
AB08-11	2088.66	20.8867	5.51181		1.87558	37	-0.0077205	0.000950986	8.20546	0.096849	86.8519	16.1198	-0.0380606	0.0771676	8.22235	0.0588664	0.0547044	-0.0246483	0.0608588	2.5458	12.3214	10.4878	17.4076	2.26859	0.140664	0.169612	0.0940953	0.064727
AB08-11	2089.22	20.8922	5.51731		1.93771	37	0.000933164	0.00290283	7.54342	0.0988342	105.233	15.533	0.316619	0.286343	9.02425	-0.00608884	0.477096	-0.0236656	0.102087	1.43054	9.81021	9.80089	15.3702	2.53261	0.135056	-0.0329994	0.0580642	-0.00758158
AB08-11	2089.76	20.8977	5.52281		2.03862	37	0.010756	0.000287594	7.30366	0.093719	110.394	16.6475	0.18785	0.124846	5.7679	0.0605471	-0.0195383	0.241958	0.132745	1.53248	10.8042	11.9395	16.3549	2.73757	0.183465	-0.0353509	0.0276218	-0.00812184
AB08-11	2090.32	20.9032	5.52831		1.96729	37	0.017428	-0.000793011	7.67711	0.0921499	101.933	16.2087	-0.0377498	0.208093	8.41437	0.187736	-0.0188407	0.147397	0.150554	1.32816	12.5051	12.555	15.0243	2.78149	0.102115	0.100788	0.0266357	0.0641983
AB08-11	2090.86	20.9087	5.53381		1.81572	37	0.0122124	-9.20059e-05	6.56885	0.0791883	89.6681	14.9316	0.100732	0.275433	6.02439	-0.00585684	0.118588	0.13725	0.0981975	2.21187	9.96608	9.75058	14.0893	2.27113	0.12991	0.0310537	0.0869017	0.026243
AB08-11	2091.41	20.9142	5.53931		1.85361	37	0.0102924	0.000237568	7.44047	0.0884575	98.5623	15.1256	-0.0360982	0.366723	4.38922	0.241369	0.121784	0.0587857	0.100844	1.27006	10.5982	9.01719	11.816	2.45651	-0.00964543	0.0963787	-0.00641623	-0.00748925
AB08-11	2091.97	20.9197	5.54481		2.04516	37	0.00057962	-0.000305002	7.39736	0.0925542	121.456	15.4335	0.0356449	0.0774723	4.1214	-0.00636672	0.0549204	0.0622263	0.0610991	1.49582	9.87407	8.56142	15.7477	1.79949	0.0276475	0.0337571	0.0269611	-0.00792758
AB08-11	2092.51	20.9252	5.55031		1.90475	37	0.0155127	-0.00018602	8.27802	0.0867189	90.9282	15.6084	0.47439	0.208704	3.43372	-0.00630833	0.0544168	0.14783	0.0605388	1.93224	12.0664	8.06525	11.001	1.68828	0.102414	-0.034189	0.0267139	-0.00785487
AB08-11	2093.07	20.9307	5.55582		1.98671	37	0.00395015	0.00974101	7.61479	0.0940216	112.225	16.8817	-0.0402223	0.595516	3.23298	-0.00670185	0.0578113	-0.0260482	0.112365	1.57456	10.4948	7.97603	10.3235	1.9571	0.0291028	-0.0363217	0.0283803	-0.00834487
AB08-11	2093.62	20.9362	5.56132		1.9198	37	0.00839167	-0.000176815	7.01084	0.0983478	102.557	14.5859	0.103128	0.114768	2.64548	0.0556595	-0.017961	0.0586048	0.0575433	1.12353	8.03323	7.26853	9.54153	1.68351	0.168655	0.0960822	-0.00639649	0.0268673
AB08-11	2094.17	20.9417	5.56682		1.98077	37	0.0130727	0.00365266	7.99701	0.0847668	115.095	16.0831	-0.0376271	0.251126	11.1656	0.0259632	0.0540813	0.0612755	0.0826403	1.02561	9.15622	6.76962	10.6143	1.72493	0.101783	0.0332413	-0.00668799	0.0280917
AB08-11	2094.72	20.9472	5.57232		1.92731	37	0.0183604	0.00102328	7.46433	0.0842519	96.3372	15.7063	0.316107	0.116353	9.69853	0.0251746	-0.0182091	0.0594142	0.123714	1.28364	9.2446	7.83913	10.7042	1.94645	0.026398	0.0974092	-0.00648484	0.0272384
AB08-11	2095.27	20.9527	5.57782		2.01807	37	0.0062267	-0.00126111	8.11435	0.0870278	132.581	16.2703	-0.0387925	0.123715	10.179	-0.00646361	-0.0193612	-0.0251222	0.0851998	0.749898	9.92692	10.6894	13.6844	1.97256	-0.0103653	-0.0350305	-0.00689512	0.0659716
AB08-11	2095.82	20.9582	5.58332		2.05668	37	0.00832693	-0.000703383	8.30619	0.101579	98.8131	16.6339	0.11232	0.124997	3.8911	0.0606202	-0.0195618	0.0638281	0.0626719	2.46632	10.0298	9.64652	12.8295	2.01752	0.222519	-0.0353936	-0.00696659	-0.00813164
AB08-11	2096.36	20.9637	5.58881		2.1344	37	0.0131329	0.000913598	7.70964	0.08961	92.4125	16.6675	0.111656	0.350564	3.80123	-0.00649201	0.131449	0.0634509	0.0390289	1.37085	11.7328	8.7299	12.8638	2.02996	0.066794	0.104027	-0.00692542	0.029089
AB08-11	2096.92	20.9692	5.59432		2.11234	37	0.0156547	-0.000421927	7.56007	0.0842752	90.6198	16.552	0.0356413	0.121848	3.6619	0.0590929	-0.019069	0.236146	0.0382717	1.64709	10.6407	8.70104	11.3177	2.22953	0.0276447	0.0337536	0.0607079	-0.00792677
AB08-11	2097.47	20.9747	5.59982		1.99301	37	0.0107229	-0.00061735	7.75166	0.107024	108.299	15.8692	0.180463	0.163624	3.60448	0.02595	0.0540538	0.146844	0.0825983	1.32318	8.01725	10.2939	12.629	2.19457	0.101731	0.0332244	-0.00668458	-0.00780247
AB08-11	2098.02	20.9802	5.60532		2.023	37	0.0135702	-0.000942151	7.67847	0.101505	84.2824	16.7187	0.255302	0.0328389	3.63507	-0.00631942	0.0545125	0.0617641	0.105953	1.03379	10.7532	10.451	14.2365	2.59294	0.0274421	0.0335063	-0.00674131	-0.00786869
AB08-11	2098.57	20.9857	5.61082		2.00456	37	0.00623821	-0.000131467	7.41699	0.0970646	89.8459	16.4916	0.0362543	0.0787968	4.59212	0.0268169	0.0558593	0.151749	0.154998	2.13749	8.77404	9.63667	17.3358	2.75423	0.143634	-0.0350953	-0.00690787	-0.0080631
AB08-11	2099.12	20.9912	5.61632		1.98982	37	0.00369657	0.000218912	7.83889	0.0982581	57.7854	15.4031	-0.0376403	0.163765	7.61401	0.0582163	0.126986	0.403989	0.0601866	1.17514	9.72659	10.7186	15.8316	3.09145	0.0645265	-0.03399	0.0598073	0.0640122
AB08-11	2099.67	20.9967	5.62182		2.01929	37	0.017137	-7.03312e-05	7.76876	0.098411	73.045	16.1343	0.0354222	0.0328779	6.44274	0.0262013	0.0545772	0.234694	0.0833981	1.48648	10.9567	10.0445	15.3274	2.84537	0.0274747	0.0335461	-0.00674932	-0.00787803
AB08-11	2100.22	21.0022	5.62733		2.09125	37	0.00359201	-0.000291948	7.41596	0.0861843	63.7951	15.2504	-0.0365756	0.0741565	7.77595	0.119233	-0.0182547	0.059563	0.0803308	2.30152	8.80848	11.1551	17.6595	3.25573	0.20765	0.0323123	0.0258072	0.0273066
AB08-11	2100.77	21.0077	5.63283		2.07822	37	0.0111992	-0.000494176	7.16019	0.0910735	74.385	17.1268	0.188479	-0.0116188	8.82253	0.0271027	-0.0196037	0.153366	0.0158838	1.84894	11.5319	12.4135	17.1876	3.01707	0.10625	0.0347001	-0.00698149	0.0293245
AB08-11	2101.32	21.0132	5.63833		2.09842	37	-0.00021207	-0.000917496	7.29609	0.0994807	66.4691	16.252	-0.0381086	0.032996	10.1958	-0.00634966	0.0547733	-0.0246794	0.10646	1.64285	11.1884	9.44932	16.3516	2.89147	0.44289	0.0336667	0.0942139	-0.00790634
AB08-11	2101.87	21.0187	5.64383		2.02474	37	-0.00184026	0.000496555	7.61784	0.116982	82.0958	17.2002	0.187342	0.079156	11.1832	0.461714	0.056114	0.507889	0.132386	1.06416	9.79451	12.6975	18.518	2.95003	0.221649	0.313475	0.131006	-0.00809986
AB08-11	2102.42	21.0242	5.64933		1.96975	37	0.00246369	0.00305705	7.62328	0.0785613	59.6498	14.8695	0.389047	0.0744346	11.0839	0.214028	0.123857	0.0597864	0.080632	1.29168	10.2245	10.657	15.234	3.16451	0.281174	0.229191	0.025904	0.027409
AB08-11	2102.97	21.0297	5.65483		2.08338	37	0.0142857	0.00802623	7.98614	0.104581	63.0458	16.5549	0.486197	0.123748	12.9145	0.292693	0.356321	0.151509	0.201108	1.82655	11.2948	13.548	19.8313	3.3204	0.220295	0.866118	0.0616545	0.0289694
AB08-11	2103.52	21.0352	5.66033		2.14178	37	0.00433398	0.00493106	8.43857	0.0919514	60.2386	15.5881	0.385798	0.285268	15.7438	0.181054	0.616297	0.307879	0.0582131	1.56945	11.2372	12.912	14.2838	3.28619	0.423103	0.617505	0.154322	0.0271801
AB08-11	2104.07	21.0407	5.66583		2.12037	37	0.00850461	0.0084123	7.7849	0.117525	76.6919	15.7005	0.315997	0.15868	11.6371	0.18138	0.546782	0.391445	0.0801022	1.57227	10.7994	11.5934	16.3716	2.79006	0.568399	0.55346	0.0901665	0.0620245
AB08-11	2104.62	21.0462	5.67133		2.32877	37	-0.0062972	0.00741973	8.38049	0.108552	78.2422	16.3314	0.814255	0.244858	14.227	0.339596	0.478983	0.0597459	0.0805774	2.59938	13.4442	11.6622	17.298	3.08206	0.353681	0.622284	0.0907014	0.0623924
AB08-11	2105.17	21.0517	5.67683		2.12726	37	0.00956638	0.00776204	7.99967	0.116596	67.4424	14.8267	0.942921	0.577742	15.5852	0.334922	0.262198	0.223635	0.187529	0.986245	11.35	10.9023	16.5488	2.89244	0.241269	0.807638	0.121415	0.096054
AB08-11	2105.72	21.0572	5.68233		2.0087	37	0.0127133	0.0082606	8.1831	0.0939718	65.5924	14.4599	1.0048	0.497125	13.8857	0.425851	0.438367	0.131104	0.153967	1.58055	11.4601	9.74669	15.3568	2.67361	0.356956	0.6295	0.201648	0.281339
AB08-11	2106.27	21.0627	5.68783		2.2274	37	0.0120411	0.00946397	9.00513	0.11148	88.5188	15.5907	1.31669	0.288804	16.4457	0.562177	0.909417	0.479477	0.12498	2.31925	9.06146	11.5121	17.2738	2.71573	0.391831	0.691003	-0.00655116	0.168172
AB08-11	2106.82	21.0682	5.69334		2.28233	37	-0.00136323	0.00732728	8.57091	0.10446	73.5336	15.8973	0.607872	0.419717	17.3072	0.533742	0.699418	0.566699	0.0592832	1.89216	10.9782	11.1712	14.1263	2.68542	0.357416	0.496389	0.0916593	0.0984229

## Sheet: AB08-12
	Time [Sec]	Distance	Distance through grt (mm)		MgO	SiO2	P2O5	K2O	CaO	TiO2	Cr	FeO	Rb	Sr	Zr	Ce	Nd	Sm	Eu	Gd	Dy	Er	Yb	Lu	Hf	Pb	Th	U
AB08-12	375.715	3.75715	0		2.21383	37	0.0130323	0.0631803	9.32288	0.144193	78.4975	10.0715	1.09645	24.7991	5.91594	0.669026	0.326872	0.0511189	0.0982311	3.43395	9.96981	7.93145	7.60669	1.15715	0.142121	0.792089	0.0223985	0.0228094
AB08-12	376.265	3.76265	0.0055		2.44372	37	0.0132613	0.0612297	9.69198	0.157353	90.2297	10.9195	1.76758	15.2307	7.32083	0.713859	0.288901	0.547205	0.178691	2.80626	9.16169	7.72334	9.86388	1.24436	0.0903739	0.292771	0.133155	0.0243379
AB08-12	376.815	3.76815	0.011		2.61498	37	0.0152173	0.0524336	10.2789	0.161058	95.1891	11.4491	1.74803	9.69946	9.1784	0.3511	0.418274	0.199903	0.220707	2.37062	11.5242	9.36107	7.2335	1.28356	0.123858	0.469286	0.0244623	0.0249109
AB08-12	377.365	3.77365	0.0165		2.67333	37	0.00296347	0.0439965	9.58628	0.165641	94.0871	11.176	1.39772	7.01138	6.7884	0.445384	0.227193	0.0541082	0.103975	2.29755	9.5506	6.81563	8.31153	1.15758	0.211211	0.0164394	0.104994	-0.00512128
AB08-12	377.915	3.77915	0.022		2.95365	37	0.0135611	0.0405422	10.2955	0.161535	127.479	11.8378	2.04021	3.97948	7.56054	0.442741	0.0517656	0.278421	0.225967	2.81237	12.3685	7.91486	8.41397	1.38507	0.287329	0.0173664	-0.00357789	-0.00541007
AB08-12	378.465	3.78465	0.0275		2.95766	37	0.0135008	0.0313424	10.0423	0.167509	86.4197	11.6996	1.46997	2.35002	7.36082	0.661851	0.301404	0.791167	0.186425	1.90493	9.55822	8.11752	10.5652	1.47979	-0.00159806	0.13255	0.0819257	-0.00538602
AB08-12	379.015	3.79015	0.033		3.05124	37	0.00869129	0.022358	11.2597	0.167614	110.914	12.2898	2.18781	1.20862	5.67557	0.434733	0.174052	0.200965	0.164866	4.14855	10.466	8.88374	9.61034	1.43962	0.15604	0.0170523	0.0526976	-0.00531221
AB08-12	379.565	3.79565	0.0385		3.0639	37	0.0126355	0.0145473	10.472	0.17156	89.4153	12.642	1.88942	0.816371	7.32976	0.582126	0.0494577	0.477406	0.197401	3.05507	9.56161	9.15687	8.82616	1.31364	0.0598115	0.0718993	-0.00341838	-0.00516887
AB08-12	380.115	3.80115	0.044		2.7996	37	0.0154111	0.0121004	9.89923	0.173689	83.9505	11.7344	0.655146	0.472867	7.09346	0.383028	0.237402	0.494266	0.166083	2.52783	10.6237	8.1243	6.60106	1.15948	0.157191	0.0744385	0.0530866	0.0252281
AB08-12	380.665	3.80665	0.0495		2.79374	37	0.0151443	0.00903467	10.0251	0.189863	88.1808	11.6759	0.736443	0.370909	6.9458	0.675339	0.435027	0.0580649	0.229547	2.85693	11.3245	8.64606	7.33719	1.13929	0.0309818	0.0176415	0.025442	-0.00549578
AB08-12	381.216	3.81216	0.05501		2.63468	37	0.0172042	0.00538333	10.7613	0.175803	77.2778	11.167	0.830994	0.614401	7.49831	0.45986	0.234577	0.416298	0.391112	2.24671	10.7359	7.32829	8.93963	1.24472	0.123943	-0.0396052	0.0804307	0.0249279
AB08-12	381.766	3.81766	0.06051		2.51956	37	0.0111659	0.00456946	11.0317	0.180008	84.3294	11.7113	0.210482	0.307848	7.3169	0.598853	0.284598	0.33106	0.285196	2.52303	10.7855	8.05691	8.51199	0.978082	0.089028	0.0707423	0.0235436	-0.0050857
AB08-12	382.316	3.82316	0.06601		2.65086	37	0.0174885	0.00487746	10.5942	0.170548	81.0207	11.4778	0.206682	0.163306	7.64687	0.511172	0.453217	0.257002	0.101389	2.12186	10.2144	7.85645	7.34326	1.00719	0.0577865	0.0160304	-0.00330265	-0.00499387
AB08-12	382.866	3.82866	0.07151		2.71579	37	0.0152652	0.00977055	10.9008	0.182153	87.8869	11.4967	0.454939	0.277932	6.71654	0.690726	0.350479	0.337705	0.30948	1.71168	10.3769	7.933	7.62839	1.19204	0.152385	0.0721623	0.0240162	0.0244567
AB08-12	383.416	3.83416	0.07701		2.69448	37	0.0599457	0.0282426	10.3376	0.177977	93.7222	11.5383	1.00833	1.30526	6.58731	0.56485	0.355012	0.270434	0.181886	2.23275	10.1159	8.72999	8.70621	1.12872	0.123172	0.0168682	-0.00347526	0.024773
AB08-12	383.966	3.83966	0.08251		2.60391	37	0.159946	0.0533122	10.5434	0.17	95.4573	11.0308	0.946068	2.1068	7.33257	0.860129	0.293621	0.341556	0.0877553	2.85211	9.62709	7.79176	6.82738	0.851859	0.0918506	0.129128	0.02429	0.0247356
AB08-12	384.516	3.84516	0.08801		2.48217	37	0.179649	0.0693895	10.4507	0.162936	85.7777	11.3257	1.91155	1.95423	6.77047	0.562116	0.231991	0.340417	0.068754	3.33912	11.4049	8.57255	8.13304	1.00573	-0.0015516	0.0727417	0.024209	-0.00522944
AB08-12	385.066	3.85066	0.09351		2.61232	37	0.114791	0.090977	10.7592	0.168584	83.8013	11.6383	2.91826	2.14392	6.47804	0.622917	0.181222	0.284648	0.250809	1.95623	10.6476	7.72643	7.75874	0.960143	0.0968244	-0.0414278	0.0256054	0.0576811
AB08-12	385.616	3.85616	0.09901		2.42106	37	0.0722102	0.11161	10.0567	0.160282	85.4959	10.6003	3.28034	1.63838	6.31107	0.634508	0.489031	0.130391	0.167233	3.05697	9.96788	7.64596	8.01473	1.16752	0.0623529	-0.04036	0.0534544	0.0254029
AB08-12	386.166	3.86166	0.10451		2.23238	37	0.0542459	0.13314	9.25617	0.132041	76.1479	10.0122	4.74025	1.91087	5.99536	0.453137	0.291578	0.197114	0.105785	1.47179	9.32496	6.35992	6.86804	0.963034	-0.00154596	-0.0390262	0.106822	-0.00521042
AB08-12	386.716	3.86716	0.11001		2.00198	37	0.0301887	0.142251	7.95491	0.121346	67.0338	8.75022	5.2945	1.28171	4.61774	0.324669	0.160098	0.251469	0.116687	1.26426	7.86225	6.17958	5.86198	0.893984	0.0855382	-0.0365988	0.100178	-0.00488634
AB08-12	387.266	3.87266	0.11551		1.69909	37	0.0276206	0.135145	6.77822	0.108986	62.6344	7.72006	4.80233	1.50055	3.92195	0.533238	0.0415209	0.22332	0.103625	1.63776	6.78636	6.06176	5.64646	0.875188	0.0502131	0.106793	0.134881	-0.00433939
AB08-12	387.817	3.87817	0.12102		1.74067	37	0.0138786	0.141315	7.23632	0.114343	82.8949	7.93239	4.4869	1.9428	4.60112	0.70764	0.428419	0.158349	0.0700064	1.67912	7.80589	4.97088	7.14737	0.914751	0.0732734	0.103011	0.0636682	0.0197327
AB08-12	388.367	3.88367	0.12652		1.76481	37	0.0182813	0.137409	7.15757	0.107281	68.4798	7.95915	5.21964	1.26163	4.80443	0.779207	0.521356	0.195636	0.0771793	1.97615	6.51689	5.14286	5.65419	0.959	0.0665466	0.0528784	0.0779355	0.0396437
AB08-12	388.917	3.88917	0.13202		1.79648	37	0.0158521	0.127186	7.04541	0.108344	66.1731	7.93899	5.41781	1.36193	4.12299	0.756647	0.255787	0.143233	0.0633237	1.24922	7.2316	5.49741	6.7214	0.905504	0.0438115	0.0931777	0.117685	0.0394842
AB08-12	389.467	3.89467	0.13752		1.90274	37	0.0118013	0.110559	7.01356	0.114614	71.457	8.05514	4.52864	0.975608	4.84289	0.865548	0.538675	0.202135	0.164053	0.829768	8.0934	6.74187	6.44094	0.998212	0.0687571	0.222742	0.0597439	0.0185164
AB08-12	390.017	3.90017	0.14302		2.01211	37	0.0162551	0.0926855	7.4769	0.123019	77.3204	8.19274	3.85097	0.824282	4.87706	0.80376	0.614002	0.099887	0.172413	2.34181	9.25093	6.90317	7.67736	0.987233	0.0477658	0.0574191	0.128307	0.0666359
AB08-12	390.567	3.90567	0.14852		2.21698	37	0.0192696	0.072187	8.08635	0.131566	73.8607	9.33819	3.3966	0.420017	5.84075	0.835374	0.399897	0.406979	0.136752	2.60438	8.0848	7.61196	9.24007	1.22714	0.103284	0.249885	0.136963	-0.00440636
AB08-12	391.117	3.91117	0.15402		2.42428	37	0.0189821	0.055467	9.58745	0.161176	93.3811	10.3996	3.06117	0.608002	6.53052	1.31774	0.261504	0.304196	0.245336	2.76199	8.92551	8.63865	9.32472	1.25764	0.109534	0.115003	0.095804	-0.00467302
AB08-12	391.667	3.91667	0.15952		2.53723	37	0.0175597	0.0415752	9.94857	0.156744	86.48	11.0398	3.0479	0.344517	7.81663	1.15112	0.404073	0.541073	0.213214	2.16896	9.90367	8.19949	10.2726	1.51724	0.149945	0.23487	0.0506394	0.0240652
AB08-12	392.217	3.92217	0.16502		2.74563	37	0.00400728	0.0300238	9.96943	0.181574	84.9929	11.716	2.21818	0.499357	8.07564	1.07381	0.353919	0.269602	0.275035	2.97199	11.6616	10.3772	12.139	1.65527	0.0295326	0.241034	0.135118	-0.00523871
AB08-12	392.767	3.92767	0.17052		2.77226	37	0.0124895	0.0210781	10.2478	0.179391	133.197	11.2184	1.57184	0.309265	8.82187	1.17832	0.582187	0.402235	0.304787	2.65592	11.9887	10.6274	12.3575	1.8057	0.21071	0.071068	0.0506829	-0.00510911
AB08-12	393.317	3.93317	0.17602		2.67946	37	0.00940381	0.0142374	10.5681	0.182935	122.523	11.7255	1.28886	0.276454	8.0607	1.08419	0.707703	0.124867	0.19707	2.80496	10.3217	10.449	10.8208	1.93983	0.120953	0.0717785	0.0511896	-0.00516019
AB08-12	393.867	3.93867	0.18152		2.88647	37	0.00752538	0.0137765	9.80581	0.215798	107.492	11.9672	1.05654	0.20594	8.48586	1.19761	0.471269	0.267239	0.0868496	2.57616	11.6375	10.6294	14.4063	1.83528	0.0909027	0.0722319	-0.0034342	0.0541534
AB08-12	394.418	3.94418	0.18703		2.83732	37	0.0198371	0.0104778	11.2018	0.20318	123.991	12.5509	0.796256	0.254975	8.8252	1.12114	0.877012	0.281485	0.130615	3.10298	13.0814	11.1358	12.5805	2.11761	0.0957486	0.0760825	0.054259	-0.00546961
AB08-12	394.968	3.94968	0.19253		2.62623	37	0.0131709	0.00856536	10.7899	0.204986	108.767	12.0597	1.00824	0.135267	8.36992	0.94223	0.781564	0.413673	0.200667	2.482	10.6682	11.3925	15.3784	2.01461	0.0608011	0.0730889	-0.00347494	0.0247707
AB08-12	395.518	3.95518	0.19803		2.76426	37	0.0103964	0.00881578	9.87515	0.201273	91.3583	11.2523	0.813154	0.169203	8.40178	1.11369	0.16953	0.125206	0.10505	2.9354	12.9975	12.0169	13.3906	2.1487	0.18269	-0.038755	0.0787039	-0.00517421
AB08-12	396.068	3.96068	0.20353		2.94663	37	0.0244916	0.00637219	12.2176	0.217053	134.791	12.6381	0.438751	0.0681787	10.3677	0.67874	0.322564	0.139481	0.281999	2.72278	14.4794	12.1804	15.406	1.88607	0.100904	0.0185029	-0.00381205	-0.00576413
AB08-12	396.618	3.96618	0.20903		2.74684	37	0.00997763	0.0027995	11.442	0.201905	124.428	12.0863	0.759547	0.145919	9.14563	0.812856	0.317195	0.368978	0.297583	3.88838	13.2145	10.9783	14.3812	2.03515	0.166496	0.139495	0.0262402	0.0267215
AB08-12	397.168	3.97168	0.21453		2.52054	37	0.0038095	0.00291759	9.97079	0.204989	112.005	11.0465	0.321422	0.162857	7.98427	0.560872	0.336452	0.527868	0.190194	2.23424	11.5355	11.1824	11.7084	1.45223	0.205391	-0.0373015	-0.00329357	0.0234779
AB08-12	397.718	3.97718	0.22003		2.73243	37	0.00452451	0.00314495	10.8047	0.208883	94.3994	11.9252	0.976457	0.0601902	8.68207	0.285898	0.225749	0.400632	0.139725	2.76612	12.6298	11.202	11.7045	1.69367	0.0588843	0.0163349	-0.00336539	-0.00508875
AB08-12	398.268	3.98268	0.22553		2.61618	37	0.00845808	0.00418464	11.1377	0.214902	98.6042	11.6898	0.588246	0.090265	9.33457	0.343915	0.101704	0.312785	0.131933	2.04159	10.8406	9.88895	11.2152	1.46423	0.169653	0.015424	-0.00317771	-0.00480496
AB08-12	398.818	3.98818	0.23103		2.58435	37	0.0212752	0.00246991	10.6155	0.206577	91.997	11.3036	0.201347	0.0575434	7.04936	0.423094	0.215822	0.184046	0.185795	2.18257	11.3419	9.20834	8.55424	1.56452	0.0851641	0.067672	0.0225218	-0.00486497
AB08-12	399.368	3.99368	0.23653		2.87037	37	-0.00145539	0.00266339	10.1626	0.194394	115.463	11.003	0.436335	0.197328	7.46548	0.228485	0.0476087	0.256064	0.118819	2.11411	10.9263	9.47259	7.65411	1.395	0.116627	0.0692113	-0.00329058	-0.00497563
AB08-12	399.918	3.99918	0.24203		2.68739	37	-0.000563236	0.00207043	10.5999	0.192997	109.45	11.1948	0.344225	0.0630847	8.27653	0.244917	0.11289	0.347188	0.222767	2.39274	11.9527	8.09703	9.73905	1.29554	0.0933652	0.0171205	0.0529084	-0.00533346
AB08-12	400.468	4.00468	0.24753		2.45728	37	0.0045278	0.00315692	10.4789	0.197184	67.2738	11.3825	0.606868	0.293308	7.70727	0.223316	0.179378	0.431024	0.209084	2.06628	11.4459	8.00954	10.2751	1.45291	0.0958392	0.0175741	0.112241	-0.00547478
AB08-12	401.018	4.01018	0.25303		2.84474	37	0.00410739	0.00740146	11.5716	0.218737	120.971	12.7363	0.309519	0.353747	8.52801	0.688141	0.39481	0.539759	0.0768335	2.76049	10.7225	10.0954	8.29656	1.49616	0.171659	0.143821	0.0270539	-0.00584397
AB08-12	401.569	4.01569	0.25854		2.76463	37	0.0194405	0.00567903	10.4465	0.198512	110.958	12.2392	0.718282	0.137992	7.10517	0.576178	0.424299	0.202783	0.20471	2.02306	9.59312	9.49592	8.15506	1.3422	0.0302178	0.131916	0.0248146	0.0558998
AB08-12	402.119	4.02119	0.26404		2.85576	37	0.0107395	0.00822081	10.358	0.229981	103.941	13.4341	0.778111	0.249164	7.19481	1.17786	0.48508	0.275071	0.185004	3.15915	12.1393	8.17336	9.57914	1.33837	0.125284	0.303114	0.0813012	0.0251977
AB08-12	402.669	4.02669	0.26954		2.93148	37	0.0120147	0.0115891	9.98681	0.282883	94.2026	12.8389	0.993577	0.133299	7.8223	1.30047	0.770196	0.690016	0.271846	1.95426	10.2015	9.23001	8.92933	1.38384	0.0906433	0.0166213	0.0239708	0.0244104
AB08-12	403.219	4.03219	0.27504		2.74143	37	0.00867125	0.0101892	10.9856	0.207157	95.9346	11.4713	0.692693	0.254918	6.79634	1.43942	0.376644	0.309742	0.283854	1.90878	10.6635	9.47784	9.33367	1.53019	0.139767	0.422578	0.0472019	-0.00475821
AB08-12	403.769	4.03769	0.28054		2.73597	37	0.0139433	0.0122546	10.3135	0.182677	82.6696	11.9616	0.906717	0.269757	6.59484	1.11925	0.662871	0.168591	0.186136	2.63398	10.4571	9.07303	7.83589	1.39975	0.130902	0.205041	0.0442083	-0.00445644
AB08-12	404.319	4.04319	0.28604		2.86272	37	0.00551518	0.0179387	10.28	0.200841	107.456	11.9906	1.14774	0.406044	8.21794	1.01264	0.736806	0.29913	0.175492	3.5886	10.2291	9.10252	10.7256	1.28834	0.10771	0.162257	-0.00303898	0.0479213
AB08-12	404.869	4.04869	0.29154		2.86956	37	0.0131203	0.0346992	10.7162	0.210888	85.5452	11.9258	1.54035	0.800216	6.5072	1.14556	0.638601	0.30311	0.227802	2.6416	11.0663	9.68562	10.2371	1.47998	0.0815118	0.0647698	0.0215559	0.0219513
AB08-12	405.419	4.05419	0.29704		3.44979	37	0.00863272	0.0582213	10.6322	0.226609	110.774	12.8	2.00578	0.912968	8.13076	0.752242	0.429911	0.179207	0.113122	1.67541	13.254	10.4801	10.9766	1.38135	0.111035	0.319327	0.0219297	0.0223319
AB08-12	405.969	4.05969	0.30254		2.76184	37	0.00978602	0.0855717	9.77799	0.195515	78.1469	11.2292	2.96495	0.735347	6.15545	0.648472	0.442013	0.250649	0.2557	2.64745	12.2344	10.2918	11.945	1.3655	0.200866	0.171975	-0.003221	-0.00487042
AB08-12	406.519	4.06519	0.30804		2.56259	37	0.0139919	0.124588	11.527	0.206701	73.289	11.868	4.67815	0.872604	8.66297	0.93657	0.460811	0.399751	0.139418	2.63951	11.3792	9.66662	10.5616	1.61386	0.179277	0.124959	0.0235059	0.023937
AB08-12	407.069	4.07069	0.31354		2.69812	37	0.00774444	0.159865	12.3678	0.209767	105.159	11.4134	6.73892	1.16589	7.53062	0.708578	0.346196	0.403438	0.287366	1.69076	9.71056	9.86865	10.4856	1.59996	0.0897054	0.126112	0.0508344	-0.00512439
AB08-12	407.619	4.07619	0.31904		2.70105	37	0.00336494	0.209989	11.2565	0.216459	96.4806	11.6728	7.9403	4.04558	8.09545	0.37588	0.415696	0.341857	0.162984	1.73272	14.0616	12.3128	12.5243	1.84621	0.185421	0.0168576	0.0243115	0.0247574
AB08-12	408.17	4.0817	0.32455		2.63752	37	-0.00180016	0.226366	10.4436	0.214991	76.0085	13.0823	7.55828	10.0614	8.60922	0.36336	0.284091	0.399679	0.248364	1.79551	13.4405	10.8953	12.193	1.73718	0.14912	0.0706163	-0.00335738	0.0529421
AB08-12	408.72	4.0872	0.33005		2.58188	37	-0.00740139	0.254767	9.8596	0.201823	75.6575	11.1729	9.01818	17.2174	8.34961	0.832368	0.050154	0.269754	0.256437	4.83997	11.5104	11.134	12.2345	2.02935	0.091758	0.241169	0.0519976	-0.00524165
AB08-12	409.27	4.0927	0.33555		2.34486	37	0.00879877	0.237514	10.136	0.216769	71.254	9.86012	7.96273	23.2839	7.03676	0.40906	0.279718	0.120954	0.190894	2.36112	12.7065	10.7827	12.5975	1.70108	0.146825	0.33695	0.0231399	-0.0049985
AB08-12	409.82	4.0982	0.34105		2.32858	37	-0.00054666	0.230173	9.86998	0.18439	86.77	10.4822	8.60646	31.9143	8.13939	0.317388	0.229642	0.47811	0.197692	2.56807	11.8345	9.74041	11.5559	1.96535	0.152053	0.182783	-0.00342342	-0.0051765
AB08-12	410.37	4.1037	0.34655		2.179	37	0.00533203	0.215988	9.67561	0.184915	78.6229	10.2428	7.09082	32.9376	6.7722	0.227553	0.0474144	0.255018	0.277885	2.57597	10.1356	13.0927	11.8178	1.9649	0.0867458	0.334039	0.0229401	-0.00495532
AB08-12	410.92	4.1092	0.35205		2.24126	37	-0.00809875	0.161821	10.8132	0.200492	69.5302	10.3837	5.34146	34.498	6.81638	0.148904	0.159811	0.0515333	0.186276	2.41978	11.2245	10.8983	12.1276	2.21745	0.114329	0.224418	-0.00322573	-0.00487757
AB08-12	411.47	4.1147	0.35755		2.36655	37	-0.00080784	0.118982	10.2106	0.197468	72.125	11.1218	3.99219	29.6995	7.47549	0.221213	0.0460934	0.379258	0.149505	2.7329	12.6088	10.2326	14.3436	2.0907	0.0271568	0.891727	-0.00318585	-0.00481726
AB08-12	412.02	4.1202	0.36305		2.35287	37	0.00351789	0.135045	10.6734	0.204323	74.0442	10.8245	2.98849	26.4575	7.45842	0.152801	0.0478919	0.121117	0.119526	1.41383	12.1966	10.9625	12.3603	2.20977	-0.00148507	0.712296	-0.00331015	-0.00500523
AB08-12	412.57	4.1257	0.36855		2.4277	37	-0.000544993	0.0653599	9.77363	0.211547	68.029	10.7038	2.30465	20.3329	6.6815	0.104591	0.468358	0.0545248	0.289403	2.68274	12.4979	11.0758	12.0456	2.03668	0.151589	0.0165659	-0.00341298	-0.00516071
AB08-12	413.12	4.1312	0.37405		1.54401	37	0.00440359	0.0323488	6.54666	0.113391	31.3558	6.45736	0.794137	9.40923	4.68416	0.077174	-0.00616739	0.156379	0.0943049	1.00258	5.84954	6.99022	8.1215	1.22766	0.0531931	0.0422676	0.014067	0.014325
AB08-12	413.67	4.1367	0.37955		2.03378	37	-0.00125084	0.0211821	9.11903	0.163444	64.0258	9.2793	1.1176	7.10509	5.44855	0.174431	-0.00867944	0.103479	0.148015	3.03505	10.6134	10.1204	13.3119	1.71168	0.125611	0.013727	0.0197967	0.0201598
AB08-12	414.22	4.1422	0.38505		1.93798	37	0.00855226	0.0144825	10.353	0.154573	41.3651	9.76801	1.23327	4.59502	4.90143	0.245783	-0.00813614	0.0423526	0.13875	1.79839	9.10427	9.44279	11.4603	1.43929	0.117749	0.0986528	0.0185575	-0.00400863
AB08-12	414.77	4.1477	0.39055		1.5712	37	0.00779783	0.045148	6.6491	0.125097	39.6276	7.64243	0.43859	2.2709	3.4969	0.519753	0.0313175	0.213062	0.0781604	1.39068	7.23665	8.43119	7.47281	1.40824	0.0767186	0.0105064	-0.00216458	0.034133
AB08-12	415.321	4.15321	0.39606		1.37673	37	0.00563557	0.00987151	5.11662	0.09462	29.3573	6.47272	0.0863049	1.40421	3.62924	0.192365	0.162014	0.148994	0.0587789	0.749069	4.35351	6.37318	5.82608	0.979845	0.016321	0.102228	-0.00191467	0.0136485
AB08-12	415.871	4.15871	0.40156		1.19921	37	0.00480848	0.00711081	4.35981	0.0697038	17.6559	4.93393	0.341923	0.793583	2.01761	0.261185	0.024415	0.0269589	0.0518048	0.781329	5.1807	4.97018	6.25804	0.85403	0.0295262	0.226612	0.0253125	0.0120291
AB08-12	416.421	4.16421	0.40706		0.844231	37	0.00360875	0.00714768	3.12475	0.0466569	13.9441	3.66886	0.481571	0.823701	1.57107	0.479199	0.143566	0.167303	0.0507467	1.0038	3.35534	3.92843	4.16849	0.651553	0.0119798	0.0295596	0.0323238	0.0585908
AB08-12	416.971	4.16971	0.41256		0.689764	37	0.00802887	0.00630671	2.84319	0.0382551	15.2444	3.04824	0.56186	0.504726	1.32041	0.569783	0.272931	0.25481	0.0208697	0.712132	2.53021	2.7771	3.75875	0.483717	0.018368	0.107004	0.00734845	0.0256244
AB08-12	417.521	4.17521	0.41806		0.617204	37	0.00877245	0.0100273	2.3761	0.041156	18.0674	3.38399	0.570773	0.833392	1.1544	0.384155	0.17793	0.229367	0.0428741	0.404002	3.19379	3.05868	3.43292	0.502148	0.0273343	0.0384277	0.0237511	0.0519744
AB08-12	418.071	4.18071	0.42356		0.858006	37	0.00723903	0.0122441	3.04464	0.0421341	22.3814	4.35686	0.845144	1.06531	0.88034	0.685741	0.227444	0.0755099	0.0405238	0.895458	3.27164	3.64588	5.13174	0.59699	0.0230965	0.0918357	0.00924018	-0.00199599
AB08-12	418.621	4.18621	0.42906		0.846911	37	0.0067678	0.016477	3.51982	0.0493084	22.2084	3.87439	0.615866	1.18256	1.73029	0.426369	0.116403	0.107049	0.0645561	0.735688	3.78526	4.05168	4.46752	0.629936	0.0240697	0.0511912	0.00962951	0.00980613
AB08-12	419.171	4.19171	0.43456		1.33386	37	0.00409799	0.0153737	5.13337	0.0712964	25.945	5.1674	0.741	1.02769	2.11302	0.386876	0.206169	0.13404	0.108787	0.859362	4.62216	4.52806	5.3295	0.63267	0.014683	0.119837	0.0120575	0.0271619
AB08-12	419.721	4.19721	0.44006		1.40536	37	0.00759788	0.0092636	5.71527	0.0896424	25.9529	6.59563	0.81229	1.0964	3.19288	0.653034	0.137883	0.159954	0.0964606	1.24683	6.17026	6.60205	7.09625	0.952959	0.054409	0.00997703	-0.00205551	0.0146525
AB08-12	420.271	4.20271	0.44556		1.62523	37	0.00683968	0.0139118	6.19692	0.089044	27.4548	7.5217	0.836944	0.72609	3.32057	0.449806	0.237382	0.0371238	0.0839083	1.57636	6.02364	7.73489	8.73656	1.22211	0.040659	0.0864731	-0.00232377	0.0366431
AB08-12	420.821	4.20821	0.45106		2.04479	37	0.00312502	0.00736025	7.75244	0.134811	46.4314	8.18697	0.375107	1.51722	4.34786	0.251067	0.386751	0.142948	0.144307	0.708574	8.24084	8.35961	9.26728	1.44877	0.0661468	0.092992	0.0174926	0.0178135
AB08-12	421.371	4.21371	0.45656		2.17934	37	0.00379484	0.00959192	8.8507	0.150586	32.5857	9.91061	0.769571	1.03045	6.05237	0.195994	0.189342	0.21965	0.14773	2.32003	8.92311	10.5239	11.5519	1.48448	0.100042	-0.031968	-0.00282265	0.0201209
AB08-12	421.922	4.21922	0.46207		2.30773	37	-0.00127851	0.00408811	9.86661	0.176452	67.0055	10.5661	0.484506	0.690341	6.82777	0.223142	0.0418225	0.0461802	0.0418294	2.89469	10.6509	11.6448	11.4604	1.7741	0.102453	0.0140307	-0.00289066	-0.00437091
AB08-12	422.472	4.22472	0.46757		2.51289	37	0.0177329	0.00668561	10.5687	0.21663	53.0433	11.1918	0.421556	0.224091	8.39925	0.0727601	0.213255	0.312925	0.252376	2.49893	10.8454	10.8997	13.1736	1.96015	0.141203	0.0154309	-0.00317913	-0.00480711
AB08-12	423.022	4.23022	0.47307		2.55661	37	-0.0113843	0.00382843	10.3588	0.219152	40.0598	13.1235	0.330896	1.27348	9.59111	0.156517	0.0490565	0.193956	0.305851	2.78688	11.9526	12.0206	14.1368	1.86971	0.120174	-0.0384009	0.0237345	-0.00512694
AB08-12	423.572	4.23572	0.47857		2.45327	37	0.00858454	0.00426955	9.89816	0.204873	62.5422	10.4549	0.314752	0.464859	9.12317	0.123859	0.046663	-0.0149589	0.0990116	2.99819	11.2227	12.0249	12.2908	1.89723	0.0853711	-0.0365273	-0.00322522	-0.0048768
AB08-12	424.122	4.24122	0.48407		2.5431	37	0.00495692	0.00457252	9.56368	0.208421	71.448	10.7852	0.0891404	0.568051	9.84985	0.0489133	-0.00992265	0.318245	0.099256	2.07723	12.7962	11.3003	12.9011	1.91107	0.114593	-0.0366175	-0.00323318	-0.00488883
AB08-12	424.672	4.24672	0.48957		2.51242	37	0.00127189	0.00136462	9.38605	0.221472	77.1196	11.3779	0.306789	0.58539	9.23445	0.0231695	-0.00964781	0.30943	0.19854	1.3427	13.2997	10.4639	13.8317	1.84923	0.0550041	0.0661203	-0.00314363	-0.00475342
AB08-12	425.222	4.25222	0.49507		2.73798	37	-0.000229971	0.00103183	11.4939	0.23489	84.8037	12.7544	0.0351825	0.136062	11.3556	0.107116	-0.0107273	0.344053	0.182939	2.37114	15.5837	12.7993	12.5153	2.09575	0.186613	0.0169659	0.0244677	-0.0052853
AB08-12	425.772	4.25772	0.50057		2.6714	37	0.0071238	0.00650447	9.73577	0.232312	64.0261	12.3862	0.331464	0.59674	11.1398	0.130435	0.0491406	0.264303	0.159389	4.13264	12.5146	13.8521	16.0741	2.03644	0.089904	-0.0384668	-0.00339646	-0.00513574
AB08-12	426.322	4.26322	0.50607		2.32169	37	0.00393895	0.00512168	8.82093	0.226975	75.8443	10.2837	0.234639	0.792171	10.5212	-0.00113652	0.0423895	0.107201	0.232586	2.30298	11.7955	11.2656	12.5155	1.88121	0.15642	0.0142209	0.0205089	-0.00443016
AB08-12	426.872	4.26872	0.51157		2.41145	37	0.00121354	0.000947785	10.1212	0.216188	63.8408	11.9642	0.0301903	1.18965	10.1644	-0.0011635	-0.00920521	0.171576	0.189432	2.35766	13.3725	11.7828	12.9662	1.87491	0.21396	0.063087	-0.00299941	-0.00453536
AB08-12	427.422	4.27422	0.51707		2.69917	37	0.00729619	0.00209313	10.1168	0.23315	115.932	11.3325	0.0335139	0.549964	10.7653	-0.00129159	-0.0102186	0.190465	0.0481813	2.85622	12.7227	12.6918	13.6267	2.06246	0.11801	0.123903	-0.00332961	0.0525041
AB08-12	427.972	4.27972	0.52257		2.50804	37	0.00412625	0.00324399	12.3901	0.257879	77.3767	11.6334	0.26425	1.20456	10.8734	0.0499179	0.0477389	0.324781	0.244089	2.35675	12.8331	11.6423	17.3905	2.35232	0.146553	-0.0373696	-0.00329958	-0.00498924
AB08-12	428.522	4.28522	0.52807		2.42262	37	0.00308232	0.00514089	11.8313	0.250548	79.7661	11.8481	0.0877119	0.927119	11.0778	0.146857	0.213405	0.378725	0.0976655	2.04394	13.0253	11.2787	14.242	2.14182	0.112756	-0.0360307	-0.00318137	-0.00481049
AB08-12	429.073	4.29073	0.53358		2.30757	37	-0.00235913	0.00474144	10.0381	0.210875	70.7643	11.9339	0.281507	0.870971	8.96717	0.0883974	0.142909	0.0460829	0.307013	3.61332	11.8757	12.9666	14.8341	1.76219	0.205768	0.0140011	-0.00288456	0.0454863
AB08-12	429.623	4.29623	0.53908		2.39382	37	0.0017982	0.00691186	10.0915	0.233609	77.7612	11.354	0.0836931	0.661084	8.86995	0.0459242	0.0971556	0.298797	0.273824	2.27715	11.5993	12.3298	14.4448	1.97491	0.189304	0.162076	0.0455341	-0.00459008
AB08-12	430.173	4.30173	0.54458		2.50227	37	0.00409461	0.00295188	10.9117	0.225515	96.9763	12.7007	0.350539	0.342848	10.0838	0.329619	0.150888	0.17422	0.1594	1.84741	12.2617	14.0968	11.2167	1.9383	0.0532894	0.113335	-0.00304562	-0.00460523
AB08-12	430.723	4.30723	0.55008		2.663	37	0.0148652	0.00232224	9.25871	0.253719	83.0882	12.4611	0.300672	0.411651	8.71505	0.309539	0.206669	0.23975	0.211248	2.31116	12.0535	11.5901	12.0563	1.94333	0.136842	0.0149543	-0.00308094	0.0219622
AB08-12	431.273	4.31273	0.55558		2.32856	37	0.0104652	0.00120063	9.62509	0.20839	83.0644	10.4052	0.02924	0.418705	7.90079	0.336938	0.04203	0.106292	0.104896	1.97065	11.2324	10.2017	12.4837	1.86526	0.076895	0.0141003	0.020335	0.020708
AB08-12	431.823	4.31823	0.56108		2.25758	37	0.00436138	0.00301427	9.02257	0.230126	104.441	11.4065	0.377214	0.73923	8.268	0.396157	0.0910466	0.397291	0.118108	1.62345	10.2229	9.51634	10.9136	1.6009	0.12635	0.105859	0.0199131	0.0202783
AB08-12	432.373	4.32373	0.56658		2.3291	37	0.00641893	0.0104849	9.18503	0.217653	78.9978	14.4309	0.542255	0.730381	7.92126	0.180671	0.196495	0.107181	0.15331	1.46142	12.4602	10.3849	11.8384	1.89743	0.208957	0.109005	0.0205049	0.020881
AB08-12	432.923	4.32923	0.57208		2.23737	37	0.00494511	0.0046551	8.65614	0.194502	82.495	9.9329	-0.0192749	0.509708	7.73183	0.119596	0.0374845	0.308424	0.121582	1.75752	10.3717	9.09837	11.0673	1.47269	0.115073	0.0125754	0.0181358	0.0184684
AB08-12	433.473	4.33473	0.57758		2.1675	37	0.000331508	0.000783205	9.54765	0.212859	83.5847	10.7388	0.455499	0.363103	8.19464	0.104364	0.0393186	0.155455	0.171634	1.84352	9.82784	9.36255	10.4954	1.50627	0.0719344	-0.0307782	0.0190232	-0.00410923
AB08-12	434.023	4.34023	0.58308		2.62717	37	-0.00104085	0.00117242	9.84043	0.224027	108.876	11.3816	0.396149	0.587752	8.68301	0.161086	0.200402	0.0477278	0.140198	2.34832	12.2996	10.8899	9.77869	1.68972	0.105886	-0.0338353	-0.00298752	0.0212962
AB08-12	434.573	4.34573	0.58858		2.71679	37	-0.00114658	0.00774536	11.5439	0.256924	101.22	11.9409	0.205951	0.335844	10.4352	0.0753198	0.0476144	0.120415	0.279057	1.87812	11.9762	11.7769	12.1203	1.85203	0.205229	-0.0372721	-0.00329097	-0.00497623
AB08-12	435.123	4.35123	0.59408		2.45616	37	-0.000206136	0.00549872	9.78068	0.237356	71.7782	11.4681	0.196072	0.550469	8.13151	0.0960139	0.0453303	0.179224	0.248722	2.46275	12.0431	9.95881	10.8164	1.75431	0.139158	0.11659	-0.0031331	-0.00473751
AB08-12	435.674	4.35674	0.59959		2.68057	37	0.00767634	-0.000524957	11.3164	0.253907	80.5904	12.5313	0.210218	0.90825	7.82994	0.0768803	-0.0103093	0.192155	0.230324	2.27873	12.53	11.3491	12.6293	1.99505	0.0587753	-0.0380443	-0.00335916	0.0239454
AB08-12	436.224	4.36224	0.60509		2.44604	37	0.00178058	0.00247459	10.3683	0.232864	94.0841	11.3634	0.0828727	0.559734	8.54936	0.0921142	-0.00922497	0.295868	0.173579	2.79427	9.57062	10.7565	13.1486	1.57231	0.106535	0.0145898	0.0210409	-0.00454509
AB08-12	436.774	4.36774	0.61059		2.01625	37	0.00234765	0.00136983	8.45038	0.212456	98.5071	9.44643	0.16791	0.838368	7.29728	0.0405914	0.0858736	0.2641	0.18397	1.82012	10.1303	8.43909	10.9122	1.62392	0.0710213	0.0130232	-0.0026831	0.0191262
AB08-12	437.324	4.37324	0.61609		2.42785	37	0.0029342	0.000919974	10.5617	0.252041	100.421	11.2833	0.151159	0.624464	7.39959	0.0507329	0.107329	0.330084	0.193652	2.03414	11.5164	11.274	15.0124	1.81112	0.209126	0.016277	-0.00335346	-0.0050707
AB08-12	437.874	4.37874	0.62159		2.71846	37	-0.000230302	0.00249259	10.9175	0.252298	146.516	12.5092	0.280332	0.246737	8.92153	0.0801128	0.0506444	-0.0162352	0.0695883	3.25401	10.986	10.4263	15.5807	1.96989	0.155472	-0.0396439	-0.0035004	-0.00529289
AB08-12	438.424	4.38424	0.62709		3.15706	37	-0.000225932	0.00265997	10.7866	0.264266	141.879	12.5093	0.214901	0.675586	8.64548	0.0253095	0.0496834	0.408797	0.198302	2.32949	13.0434	10.2284	11.943	1.89361	0.0600844	0.0166678	-0.00343398	0.0244787
AB08-12	438.974	4.38974	0.63259		2.72977	37	0.00361241	0.00112143	10.979	0.262455	224.217	13.245	0.0937146	0.346877	9.1389	0.0514233	-0.0104318	0.404644	0.122737	2.79382	10.8227	9.72835	12.8664	1.82614	0.211971	0.0164985	-0.00339909	-0.00513971
AB08-12	439.524	4.39524	0.63809		2.336	37	0.00278348	0.000927926	9.02424	0.240526	243.229	10.9216	0.0289171	0.293182	8.17128	0.377794	0.0415659	0.282784	0.243608	2.56758	11.9584	10.3287	11.6842	1.73067	0.204937	-0.0325373	-0.00287292	-0.00434409
AB08-12	440.074	4.40074	0.64359		2.49935	37	-0.00382054	0.000950305	9.59641	0.201843	336.725	9.80461	0.076212	0.7474	7.17423	0.127602	0.136948	0.158125	0.144674	2.0736	10.751	9.29317	9.33086	1.72009	0.0979727	0.0134172	-0.00276426	-0.00417979
AB08-12	440.624	4.40624	0.64909		2.28769	37	0.00638881	0.0012376	9.62726	0.237281	438.015	10.5902	0.563871	0.503126	8.61632	0.0933458	0.0440706	0.174243	0.225333	2.83163	11.2235	8.66667	10.7505	1.72282	0.0806282	0.0147849	0.0213223	-0.00460586
AB08-12	441.174	4.41174	0.65459		2.09626	37	0.00661269	0.00209503	8.66913	0.184168	478.192	9.43592	0.0766324	0.605313	6.73808	0.085178	0.186449	0.101701	0.205616	2.38433	8.59645	8.60301	9.02669	1.46179	0.0486331	0.0134912	0.0194566	0.0198134
AB08-12	441.724	4.41724	0.66009		2.93261	37	0.0159735	0.00290774	11.9204	0.210565	713.409	13.7222	0.336171	0.279051	8.83312	0.346086	0.653942	0.12604	0.143018	2.58404	12.614	10.1457	12.5101	1.76285	0.245724	0.0167199	0.0241129	-0.00520867
AB08-12	442.274	4.42274	0.66559		2.9769	37	0.0139736	0.0058037	12.9116	0.255634	731.453	13.3172	0.5534	0.958031	8.88005	0.913849	0.31196	0.286891	0.192954	2.89792	9.64055	11.2268	11.973	1.69877	0.0645068	0.25649	-0.00368673	0.0581355
AB08-12	442.825	4.42825	0.6711		2.21751	37	0.00743665	0.00377042	8.12471	0.188379	580.062	9.18107	0.661706	0.528142	7.00682	0.675155	0.623381	0.171955	0.157328	1.60761	8.33984	7.60132	9.14692	1.51281	0.0795691	0.111862	0.0210422	0.0733751
AB08-12	443.375	4.43375	0.6766		2.51658	37	0.0220462	0.00511523	10.512	0.272006	761.055	10.6756	1.29596	0.241876	8.37183	1.14341	0.531069	0.125555	0.179593	2.08144	12.5654	10.4494	11.4073	2.02826	0.121619	0.127692	-0.00343144	0.0541099
AB08-12	443.925	4.43925	0.6821		2.80364	37	0.0150155	0.00954033	10.9379	0.247289	801.743	11.9485	0.447497	0.592928	8.65379	0.967432	0.463114	0.193048	0.176627	2.28932	9.8234	9.32101	15.1942	2.09043	0.0893296	0.0709819	0.0236234	0.0240567
AB08-12	444.475	4.44475	0.6876		2.78936	37	0.0208458	0.0117788	11.4749	0.248665	823.262	11.5143	0.26771	0.341132	8.31197	0.776727	0.400103	0.0534034	0.193036	2.50759	12.0127	11.2381	13.424	2.20316	0.178466	-0.0378589	0.0233995	0.0238287
AB08-12	445.025	4.45025	0.6931		2.95681	37	0.00834463	0.0101959	11.2269	0.281014	947.028	12.5356	0.867735	0.487898	9.47721	0.735162	0.501104	0.509977	0.112101	4.04989	14.1191	12.2763	15.038	2.07566	0.0966574	0.0768046	-0.0036516	0.152236
AB08-12	445.575	4.45575	0.6986		2.97902	37	0.00841519	0.00428607	11.7819	0.274878	834.767	12.3825	0.16599	0.337055	11.4476	0.569962	0.3116	0.5902	0.252493	3.15893	14.8257	14.2822	17.9941	2.54186	0.130517	0.137034	0.0257774	-0.00556822
AB08-12	446.125	4.46125	0.7041		2.73806	37	0.00365147	0.00337796	11.3171	0.27971	809.704	11.8578	0.154873	0.314481	11.5361	0.611757	0.350986	0.409019	0.142651	1.83747	13.5983	14.757	14.9408	2.34233	0.214264	0.0166769	0.0790245	0.0244921
AB08-12	446.675	4.46675	0.7096		2.50689	37	0.0107088	0.00157941	9.94317	0.275412	652.029	10.9986	0.137578	0.086699	9.5831	0.25929	0.258265	0.426261	0.192764	1.74183	12.774	13.567	15.0704	2.44406	0.0807905	-0.0345675	0.0213652	0.0481292
AB08-12	447.225	4.47225	0.7151		2.58541	37	0.0107044	0.000679861	11.2798	0.255073	582.587	11.3954	0.149569	0.198984	10.6252	0.410605	0.338967	0.463413	0.227515	2.25094	13.2081	13.9202	15.1093	2.24333	0.0282849	0.0697919	-0.00331819	-0.00501738
AB08-12	447.775	4.47775	0.7206		2.56588	37	0.00916813	0.00105134	11.5597	0.270858	485.657	12.3608	0.0334888	0.0945089	10.0326	0.231022	-0.0102109	0.190322	0.210129	2.73466	13.0166	15.5659	14.4679	2.63586	0.207483	0.12381	0.0232898	0.023717
AB08-12	448.325	4.48325	0.7261		2.63036	37	9.28059e-05	0.00255861	11.4121	0.249956	397.892	12.0151	0.322355	0.267582	9.13814	0.126851	0.2795	0.25704	0.172877	2.12216	13.674	12.8109	16.7321	2.31742	0.0281565	0.0160327	-0.00330312	0.023546
AB08-12	448.875	4.48875	0.7316		2.17355	37	0.00483817	0.000810234	9.24468	0.224297	316.534	9.61637	0.175938	0.286902	7.90884	0.129777	0.0899793	0.276727	0.116724	2.31077	10.6786	11.0441	12.9455	2.25125	0.200547	0.0591322	-0.00281138	-0.00425104
AB08-12	449.426	4.49426	0.73711		2.75937	37	0.00240139	0.00110572	11.6037	0.277079	331.35	12.1909	0.0964756	0.136212	8.70097	0.107234	0.0506275	0.2723	0.126353	1.99697	13.4504	12.6387	16.3814	2.93088	0.15542	-0.0396307	-0.00349923	-0.00529113
AB08-12	449.976	4.49976	0.74261		3.08798	37	0.00260133	0.000822073	10.6682	0.257459	266.934	11.3725	0.0919308	0.270115	9.89902	0.102182	0.0482426	0.190738	0.138438	2.74065	10.0851	13.71	14.6711	2.35825	0.148099	0.0161845	-0.00333439	-0.00504188
AB08-12	450.526	4.50526	0.74811		3.21566	37	0.000940232	0.000872127	10.1441	0.218115	208.634	10.8702	-0.0225135	0.149633	8.93638	0.0223036	-0.00928725	0.173105	0.15838	2.37867	10.6677	11.4847	14.787	2.06302	0.134408	0.0146883	-0.00302614	-0.00457577
AB08-12	451.076	4.51076	0.75361		2.55196	37	0.00634918	0.00119971	10.3062	0.22543	249.392	12.7433	0.0318973	0.323396	7.63301	0.146285	0.0458496	0.0506269	0.183	2.37722	12.398	11.657	10.9404	2.2682	0.083883	-0.0358906	-0.003169	0.0225899
AB08-12	451.626	4.51626	0.75911		2.25996	37	-0.00430115	0.000636994	8.45294	0.182246	160.629	8.85033	0.026006	0.399577	6.42446	0.0390876	0.128003	0.147796	0.121247	1.65995	8.52032	8.25551	11.302	1.78342	0.161123	0.0125408	0.0180859	0.0184176
AB08-12	452.176	4.52176	0.76461		2.61781	37	0.0100855	-0.000202292	10.9535	0.240817	246.449	12.1022	0.274417	0.27758	8.99962	0.0784224	0.109668	0.478545	0.216408	1.8325	11.2218	12.7755	15.6904	2.35549	0.182937	0.0720709	0.0239858	-0.00518121
AB08-12	452.726	4.52726	0.77011		2.60354	37	0.00898372	0.000832131	10.2367	0.235477	162.295	11.6487	0.0930557	0.166893	9.54739	0.286731	-0.0103585	0.262648	0.213165	2.77418	14.8176	12.1344	16.3198	2.19584	0.0287708	0.0163825	-0.00337519	-0.00510357
AB08-12	453.276	4.53276	0.77561		2.57438	37	0.00706869	0.000924565	10.7359	0.26888	194.005	11.1296	0.0339224	0.060276	9.58564	0.286306	0.0487605	0.192786	0.285774	2.16525	13.9516	13.6888	15.9498	2.48855	-0.00151201	-0.0381692	0.0505528	0.024024
AB08-12	453.826	4.53826	0.78111		2.70983	37	0.00785802	0.00519774	11.441	0.239905	150.451	11.8555	0.215194	0.206208	9.83385	0.425513	0.17036	0.409355	0.161369	1.83898	12.8265	11.5605	15.9219	2.49042	0.0293118	0.127961	-0.00343866	0.0542238
AB08-12	454.376	4.54376	0.78661		2.4508	37	0.00541021	0.00303802	10.4173	0.261021	168.001	11.7956	0.499133	0.0594714	9.97512	0.43727	0.397997	0.395847	0.299947	2.13635	9.90601	12.675	13.0122	2.28583	0.117854	0.123739	0.0232764	-0.00502798
AB08-12	454.926	4.54926	0.79211		2.30805	37	0.0124188	0.00432707	10.0552	0.234847	152.618	13.0171	0.468498	0.31851	9.50845	0.701004	0.428306	0.307214	0.146467	1.78118	12.7076	13.0415	15.5705	2.2516	0.138626	0.0656468	0.0717856	0.0222485
AB08-12	455.476	4.55476	0.79761		2.77012	37	0.00799126	0.00896834	10.6982	0.303866	182.587	11.9	0.976226	0.432733	9.84712	0.837373	0.517309	0.295522	0.222099	2.68323	14.1373	15.0472	13.9783	2.52318	0.13335	0.111724	0.0210163	0.0473432
AB08-12	456.026	4.56026	0.80311		2.54706	37	0.0108601	0.0103436	10.5393	0.238093	186	13.3174	1.56718	0.440432	8.86995	0.764389	0.319154	0.207497	0.139556	1.61743	13.3449	13.0971	13.849	1.93117	0.0945071	0.142368	0.0613289	0.0190077
AB08-12	456.577	4.56577	0.80862		2.291	37	0.0136452	0.0148625	10.0114	0.219633	148.879	10.8259	2.09291	0.598908	13.5437	1.19999	0.63604	0.420453	0.151492	1.59128	13.0098	11.1801	12.5503	1.91481	0.0929793	0.182511	0.0183636	0.0640347
AB08-12	457.127	4.57127	0.81412		2.45947	37	0.0202099	0.028867	10.0324	0.248663	166.566	11.6111	3.17591	1.07167	10.2908	1.10573	0.491634	0.339672	0.226511	2.24282	10.7729	10.1157	11.1656	1.79167	0.101129	0.198508	0.0427997	0.0449935
AB08-12	457.677	4.57677	0.81962		2.57217	37	0.0300296	0.0374048	10.1297	0.229773	166.445	11.364	5.18637	0.932936	8.87587	1.26489	0.314951	0.204765	0.223126	1.69058	9.27599	9.54786	13.8013	1.943	0.187706	0.268214	0.0394704	0.0187574
AB08-12	458.227	4.58227	0.82512		2.35654	37	0.0242323	0.0472524	9.97837	0.218725	161.966	10.4575	6.20281	0.892375	8.87098	1.36765	0.583412	0.148381	0.177856	1.75963	9.85259	9.45523	11.1469	1.79782	0.115211	0.390303	0.0389089	-0.00392224
AB08-12	458.777	4.58777	0.83062		2.31901	37	0.0257425	0.0581629	9.18791	0.203916	127.575	10.4119	6.64135	3.30464	8.074	1.40358	0.774094	0.474553	0.0947309	2.25049	8.47253	9.34456	11.274	1.69193	0.116524	0.224965	0.0603402	0.132042
AB08-12	459.327	4.59327	0.83612		2.71293	37	0.0370549	0.0733798	10.2247	0.244442	152.952	11.9002	9.78248	1.29216	8.02934	1.84718	0.695825	0.176972	0.161918	1.76555	12.5257	10.2978	13.0572	1.60076	0.0818907	0.115125	0.046406	0.0220533
AB08-12	459.877	4.59877	0.84162		2.74371	37	0.0266652	0.0699675	9.19762	0.223144	126.348	11.3937	7.95705	1.1411	8.54685	0.965226	0.683329	0.173794	0.191881	2.27908	9.88086	9.85943	12.2008	1.69256	0.162203	0.358836	0.0212672	0.0216573
AB08-12	460.427	4.60427	0.84712		2.59869	37	0.0194957	0.0598033	9.74202	0.223461	130.857	12.9436	7.96892	1.33864	9.52421	1.163	0.757973	0.0499446	0.214357	1.89634	12.4442	8.84294	10.3929	1.74165	0.194959	0.217499	0.0468943	0.103323
AB08-12	460.977	4.60977	0.85262		2.2659	37	0.0241136	0.04119	8.57545	0.190178	95.8303	10.1381	5.7725	0.670628	6.8551	1.25117	0.699273	0.264742	0.111669	2.01762	11.3178	10.1628	10.2497	1.33073	0.0953276	0.0565713	0.0403444	0.0191727
AB08-12	461.527	4.61527	0.85812		2.32877	37	0.0196734	0.0360115	9.05296	0.19783	92.674	10.0191	3.62589	0.672246	7.26187	1.20025	0.583743	0.102995	0.208233	2.21262	9.28272	9.22856	11.16	1.69571	0.0997672	0.104749	0.0422233	0.0443876
AB08-12	462.077	4.62077	0.86362		2.23798	37	0.0206388	0.0269339	9.99238	0.215638	184.071	10.2705	3.21698	0.669187	7.83911	1.28174	0.777649	0.160288	0.207285	1.80026	9.43167	10.0273	9.45852	1.5769	0.174741	0.104272	-0.00280208	0.0683969
AB08-12	462.627	4.62627	0.86912		2.46588	37	0.0119393	0.0210127	10.3152	0.229859	107.624	11.4115	2.64657	1.13185	8.24656	1.20445	0.607912	0.469827	0.153423	1.67293	11.6019	9.26897	11.7721	1.74932	0.0775946	0.156514	0.137777	-0.00443256
AB08-12	463.178	4.63178	0.87463		2.60796	37	0.00570176	0.0160271	10.6029	0.245493	120.999	11.4691	1.23279	0.681982	9.37927	1.06493	0.409936	0.170881	0.269463	2.66976	10.4626	10.2916	12.302	1.57104	0.0790721	0.111163	0.0209108	-0.00451697
AB08-12	463.728	4.63728	0.88013		2.51322	37	0.00434427	0.0121927	9.94219	0.22376	91.2046	11.2286	1.0343	0.784365	8.67896	1.21654	0.414213	0.732653	0.174305	1.39756	10.5031	7.73317	8.48866	1.5447	0.134065	0.209995	0.0211289	0.0215165
AB08-12	464.278	4.64278	0.88563		2.54459	37	0.0105339	0.0105731	10.7465	0.26667	103.09	11.7523	1.23323	0.779826	9.74483	0.936068	0.4481	0.456035	0.206228	2.8011	10.2484	8.47511	11.6081	1.55085	0.115733	0.0686807	0.0489803	-0.00493749
AB08-12	464.828	4.64828	0.89113		2.49812	37	0.00577601	0.00904173	10.174	0.229129	92.7263	11.7708	0.979166	0.458732	10.2903	1.01114	0.715837	0.313277	0.235443	2.15903	10.1337	10.3285	10.2547	1.54765	0.227035	0.221425	0.0477406	0.0226876
AB08-12	465.378	4.65378	0.89663		2.52766	37	0.0135823	0.00983342	12.8838	0.244507	110.996	11.5036	1.14816	0.761318	9.71178	1.45821	0.772901	0.379497	0.132354	2.50579	9.20683	9.92053	10.4344	1.56821	0.170194	0.221783	0.0478178	0.0778135
AB08-12	465.928	4.65928	0.90213		2.48413	37	0.0156276	0.0100197	10.2513	0.246085	116.622	11.1765	0.810446	0.792029	9.72662	1.35444	0.658737	0.181707	0.252168	2.15483	9.60757	11.1552	11.1297	1.65259	0.169589	0.118206	0.123884	0.0775367
AB08-12	466.478	4.66478	0.90763		2.6606	37	0.0159137	0.0101739	10.8547	0.249586	99.6597	11.8626	0.43735	0.71828	11.7924	1.27814	0.973189	0.120681	0.136937	2.00064	10.9517	11.2531	10.8801	1.75328	0.0577094	0.176099	0.0230877	0.0235111
AB08-12	467.028	4.67028	0.91313		2.80213	37	0.0324206	0.0118884	11.4603	0.272278	91.691	13.3856	1.33771	0.957685	10.1294	2.08735	0.796646	0.49467	0.242861	2.78415	11.036	10.8451	13.5886	1.63208	0.0937562	0.0744993	0.0531299	0.0558533
AB08-12	467.578	4.67578	0.91863		2.79606	37	0.0195848	0.0135616	10.1947	0.271709	121.646	12.202	1.01191	0.958522	10.3782	1.73419	1.37427	0.25595	0.0831809	2.58539	8.67641	11.222	9.33414	1.67392	0.116576	0.282044	0.101963	0.0234462
AB08-12	468.128	4.68128	0.92413		2.54613	37	0.00990324	0.0126401	9.94069	0.249282	86.9808	11.3455	0.862059	0.888173	10.2721	1.81428	1.54291	0.376405	0.216797	1.69095	11.2907	10.8405	12.2921	1.72565	0.25392	-0.0358099	0.0727231	-0.00478102
AB08-12	468.678	4.68678	0.92963		2.61107	37	0.00824718	0.00934188	9.50918	0.245612	106.208	11.9121	0.356621	0.837765	8.33064	1.41732	1.07726	0.241114	0.145405	1.32341	10.0065	10.3136	11.6492	1.71737	0.13762	0.215564	0.0464771	0.0220871
AB08-12	469.228	4.69228	0.93513		2.56964	37	0.00863719	0.0087082	10.3418	0.239337	74.3514	11.7964	0.635103	0.979393	8.72018	1.3365	0.595041	0.114687	0.282739	2.12629	9.76616	10.2762	11.4635	1.55081	0.0267185	0.11664	0.021941	0.0223435
AB08-12	469.778	4.69778	0.94063		2.43864	37	0.00125224	0.00601329	10.2462	0.224407	71.7436	11.0922	0.24787	1.06478	7.88844	1.19941	0.479009	0.30465	0.128502	1.65522	10.7698	7.67185	11.3988	1.4875	0.109697	0.0150228	0.0464259	0.0220628
AB08-12	470.329	4.70329	0.94614		2.46232	37	-0.00271986	0.00469131	11.6131	0.210717	77.1451	11.9786	0.603831	1.40145	7.59542	1.2011	0.565741	0.293333	0.188212	2.34248	9.89531	8.92613	9.9069	1.61792	0.0788827	-0.0337512	0.0208607	-0.00450615
AB08-12	470.879	4.70879	0.95164		2.23705	37	0.00752746	0.00308442	9.42272	0.179365	68.4919	10.2959	0.314409	1.57233	5.98522	1.0586	0.806028	0.325196	0.187303	1.8531	7.88945	8.68296	10.3402	1.66108	0.0723081	-0.0309381	0.019122	-0.00413058
AB08-12	471.429	4.71429	0.95714		2.02518	37	0.000322408	0.00232278	8.36077	0.171053	54.1108	9.3401	0.0728688	1.91055	5.70826	1.66008	0.826202	0.151188	0.224112	1.22374	9.49795	7.6524	8.17755	1.36754	0.0699598	0.0983525	0.081933	-0.00399643
AB08-12	471.979	4.71979	0.96264		1.91378	37	0.00402944	0.000920229	8.52882	0.149269	61.4248	8.4781	0.241689	3.11956	5.58017	1.4979	1.16506	0.0906161	0.11622	1.68001	6.81457	7.29421	9.0575	1.53405	0.154441	0.0921589	0.0371484	0.0176539
AB08-12	472.529	4.72529	0.96814		1.7689	37	-0.00267605	0.000754754	7.28691	0.135239	49.5138	8.81879	0.0617747	3.90716	4.97886	1.82471	0.975472	0.451482	0.141509	1.60037	6.42012	7.04733	9.11255	1.29265	0.0995178	0.192133	0.051534	-0.00338798
AB08-12	473.079	4.73079	0.97364		1.66628	37	0.00179952	0.00157883	7.99736	0.115521	53.2401	7.43788	0.164708	2.50386	4.28202	1.72276	1.25606	0.541601	0.152142	1.24752	7.81183	7.83956	9.73333	1.53034	0.128255	0.109808	0.0308497	-0.00310983
AB08-12	473.629	4.73629	0.97914		1.71317	37	0.00289919	0.00174239	7.58089	0.108497	51.0562	8.22351	0.0907989	2.77049	4.50746	1.39026	0.700346	0.322848	0.214395	1.29418	8.01823	8.92043	10.4622	1.63015	0.0171709	0.172733	-0.00201437	-0.0030459
AB08-12	474.179	4.74179	0.98464		1.65631	37	-0.000897949	0.00573938	6.94662	0.12011	42.6634	7.67144	0.340289	6.0199	4.03764	1.08619	0.492232	0.576494	0.0952744	1.59584	7.38824	8.28008	10.1803	2.04568	0.0719568	0.00985433	0.0142116	0.0495566
AB08-12	474.729	4.74729	0.99014		1.98168	37	0.000279411	0.0114256	8.04086	0.124154	48.1332	8.43801	0.424013	2.49942	4.02083	1.40315	0.796357	0.272675	0.082708	1.80045	8.17919	9.95265	13.1279	2.04829	0.0606299	0.122295	-0.00229052	-0.00346346
AB08-12	475.279	4.75279	0.99564		2.15065	37	0.00174392	0.0180255	7.28225	0.104932	66.3351	7.63535	0.805107	3.33337	3.47226	1.02251	0.698778	0.358268	0.0202547	1.59663	7.01574	9.19117	12.984	2.08766	0.0391124	0.336351	-0.00223537	-0.00338007
AB08-12	475.829	4.75829	1.00114		1.85706	37	0.00285614	0.0206037	8.0239	0.0944097	53.2261	9.21512	1.1055	2.09676	3.14432	1.32111	0.728608	0.446667	0.0891644	1.23195	7.5248	10.4002	14.0896	2.32015	0.0432059	0.131842	-0.00246933	-0.00373383
AB08-12	476.379	4.76379	1.00664		1.99941	37	0.000991477	0.0199151	7.69754	0.069859	39.5618	8.91429	1.35448	2.41623	3.12041	1.65328	0.680093	0.493787	0.101743	1.75033	7.91404	9.95353	14.3593	2.28863	0.0428775	0.566972	0.0171539	0.0174685
AB08-12	476.93	4.7693	1.01215		2.38382	37	0.00386021	0.0178916	9.21832	0.082832	47.1302	9.12715	0.983875	11.871	3.47758	1.89256	1.09898	0.341809	0.150275	1.94777	9.66456	12.2365	16.3095	2.54323	0.101766	1.03595	0.111979	0.0700858
AB08-12	477.48	4.7748	1.01765		2.20876	37	0.0105191	0.0181136	9.57743	0.0852335	41.6131	9.42519	0.642765	29.5634	4.0813	3.91935	2.19299	0.889336	0.35817	2.50483	11.091	13.7097	14.9415	2.50368	0.051091	2.3291	0.183959	0.0712748
AB08-12	478.03	4.7803	1.02315		2.25468	37	0.00260041	0.0128602	9.42507	0.0762648	56.5156	9.28714	1.14217	61.8326	5.33304	17.3204	10.9811	3.55748	0.643265	5.85025	13.2679	15.2609	16.9699	2.88633	0.177955	4.00749	0.769975	0.0525612
AB08-12	478.58	4.7858	1.02865		2.03441	37	0.0026256	0.0139703	10.1045	0.102255	69.8128	9.41075	0.858662	106.962	6.27463	53.9912	34.1223	8.37955	2.14256	9.04879	19.142	14.8477	17.6518	2.7045	0.149481	6.93332	1.82774	0.431104
AB08-12	479.13	4.7913	1.03415		1.9119	37	0.00254069	0.00843544	10.6004	0.120065	47.2919	8.45496	0.716879	168.659	6.67925	96.8159	61.1612	16.0329	4.24088	19.164	24.4546	17.1906	18.9162	2.80159	0.20309	9.71459	2.73287	0.726694
AB08-12	479.68	4.7968	1.03965		1.70585	37	0.0187594	0.00824627	12.3443	0.121619	41.0804	8.1225	0.431435	256.054	8.59607	143.58	90.3335	25.2118	6.64963	28.7291	33.2514	21.026	19.6479	2.52236	0.232095	13.9732	3.17307	0.782242
AB08-12	480.23	4.8023	1.04515		1.46956	37	0.0299268	0.0100399	13.2503	0.136448	31.5561	8.0201	0.319078	346.657	9.45187	190.906	114.247	34.1043	8.18677	35.8004	37.4364	20.0384	18.6555	2.79415	0.321241	15.4714	3.86892	0.89907
AB08-12	480.78	4.8078	1.05065		1.80411	37	0.0566162	0.00274508	14.9384	0.164278	35.7998	7.16105	0.219809	450.666	14.8537	210.467	139.988	36.2749	11.2103	41.2371	44.4601	21.7614	16.9834	2.6832	0.408137	17.6447	3.81912	0.84446
AB08-12	481.33	4.8133	1.05615		1.08454	37	0.0812842	0.00204041	14.906	0.16289	41.0399	6.0446	0.034181	512.091	13.938	227.32	149.46	40.1871	12.3465	48.7788	46.3132	22.6815	17.6374	2.53647	0.455537	18.2142	3.96408	0.933811
AB08-12	481.88	4.8188	1.06165		1.35902	37	0.107317	0.00242158	18.3612	0.180694	38.1898	7.39981	0.164529	632.481	17.651	266.931	167.143	48.3922	14.4372	52.4299	48.1991	24.6229	22.1362	3.09857	0.784398	18.2175	4.5823	0.782939
AB08-12	482.43	4.8243	1.06715		0.761077	37	0.13372	0.00182924	17.9638	0.224839	50.0829	4.8393	0.0987842	699.35	19.3902	295.705	192.748	55.0464	15.9381	57.3907	52.9491	25.126	19.9853	2.67621	0.930724	21.3654	5.50186	0.923338
AB08-12	482.98	4.8298	1.07265		0.800802	37	0.153198	0.00320996	19.5064	0.22272	51.8727	4.54452	0.232238	782.375	21.8162	384.239	249.807	63.0654	17.714	67.4481	62.4572	27.7572	21.9351	2.86644	0.897389	19.8444	7.54092	1.63002
AB08-12	483.531	4.83531	1.07816		0.581301	37	0.129474	0.000818902	20.2416	0.24548	62.4603	3.60258	0.0376803	833.878	26.2033	494.67	303.475	77.3773	20.9531	73.9634	67.7012	30.3735	23.1821	3.04009	1.00603	21.4738	9.91543	1.19114
AB08-12	484.081	4.84081	1.08366		0.336058	37	0.156212	0.00247964	20.4387	0.230019	109.364	3.35579	0.1617	828.534	21.7029	594.604	359.406	88.6715	24.5125	97.0774	73.1427	30.2426	20.0096	3.01481	0.770911	19.5898	12.1172	1.54438
AB08-12	484.631	4.84631	1.08916		0.404601	37	0.149565	0.0023993	20.4292	0.24549	74.4258	3.15548	0.102946	886.308	23.6945	741.919	446.499	104.408	28.4707	102.926	88.1496	34.8427	21.0184	3.33903	0.869422	22.0239	12.4627	1.83365
AB08-12	485.181	4.85181	1.09466		0.250269	37	0.133637	0.00301009	20.3886	0.253698	96.0966	3.73079	0.0377591	955.537	24.3307	834.577	499.724	121.722	30.191	118.399	91.8169	32.7526	21.9816	2.94011	0.772507	22.9171	13.9039	2.13395
AB08-12	485.731	4.85731	1.10016		0.282227	37	0.115452	0.00328255	24.3097	0.234384	118.929	3.32513	-0.0277877	910.295	24.167	837.216	503.134	123.279	29.7762	115.599	85.7901	33.6073	22.5553	2.63106	0.735638	22.5148	11.5687	2.12468
AB08-12	486.281	4.86281	1.10566		0.449282	37	0.0709656	0.00347483	19.4322	0.207637	136.51	2.68611	0.166375	900.314	22.0429	795.379	486.958	119.002	31.988	113.969	84.4405	30.6861	19.6425	2.85099	0.826316	24.1632	12.3196	1.84448
AB08-12	486.831	4.86831	1.11116		0.466658	37	0.0675705	0.00313199	21.2977	0.212668	85.8902	3.41801	0.163213	845.623	18.5242	701.032	435.041	102.52	27.1373	92.2518	78.3722	33.3647	19.8261	2.51984	0.745634	19.7145	9.56157	1.43368
AB08-12	487.381	4.87381	1.11666		0.495582	37	0.0480284	0.00513417	20.0481	0.20724	95.4726	5.28941	0.352557	797.482	15.2773	585.424	353.107	82.8046	23.5886	79.0423	59.8947	28.4071	19.6884	2.69835	0.484609	19.7864	8.17995	1.11826
AB08-12	487.931	4.87931	1.12216		0.713944	37	0.0478799	0.0221794	17.7345	0.153279	65.2181	5.15511	0.858078	638.043	13.909	451.551	273.714	62.7794	17.0015	54.1121	48.3981	20.5004	16.0898	2.77885	0.662397	15.642	6.05311	1.07012
AB08-12	488.481	4.88481	1.12766		1.05177	37	0.0444423	0.158609	18.1023	0.181175	52.4165	6.31676	4.50249	601.906	12.339	352.11	204.944	48.6625	14.0735	48.2255	41.3816	19.5323	16.862	2.48612	0.570737	14.5872	4.02309	0.790714
AB08-12	489.031	4.89031	1.13316		1.2561	37	0.0431201	0.315561	15.0269	0.158152	55.0931	7.2801	10.133	437.747	10.0776	244.634	145.867	35.244	9.98619	30.2553	30.6777	16.7051	19.1224	2.43289	0.212814	10.0135	2.61801	0.378164
AB08-12	489.581	4.89581	1.13866		1.26258	37	0.0189625	0.399483	13.8006	0.141231	58.1973	7.28742	12.0875	329.821	9.02088	161.282	90.7646	21.5667	6.76085	22.9352	22.4094	15.1639	15.7176	2.36715	0.220227	7.00995	1.65193	0.262085
AB08-12	490.131	4.90131	1.14416		1.67053	37	0.0368451	0.521961	13.5589	0.188869	51.2188	8.51674	13.8297	270.149	9.23441	127.301	69.3205	16.7701	5.07424	17.3124	19.4924	13.9895	15.5352	2.66576	0.116344	4.95623	1.54636	0.278667
AB08-12	490.682	4.90682	1.14967		1.4549	37	0.0215872	0.428913	9.2907	0.15119	42.3683	7.12807	13.2071	136.524	6.42179	57.0435	34.3099	10.4859	2.84356	8.82102	12.0858	10.4412	12.0816	1.92073	0.0651055	2.71838	0.725584	0.145046
AB08-12	491.232	4.91232	1.15517		1.9069	37	0.0028034	0.505455	10.5355	0.188007	59.239	8.90591	15.5875	120.254	8.00486	42.6425	26.4919	6.5482	2.3744	8.50665	17.1819	12.3312	14.2868	2.29233	0.128516	2.40206	0.622099	0.095629
AB08-12	491.782	4.91782	1.16067		2.03987	37	0.0129784	0.48498	10.3635	0.178621	73.1164	9.62885	15.3772	122.597	7.96698	38.5707	14.7865	5.57767	1.83293	4.6962	13.3557	12.4537	15.0213	2.47103	0.159121	2.18444	0.450047	0.0727507
AB08-12	492.332	4.92332	1.16617		2.31329	37	0.00384276	0.44874	11.9661	0.204133	45.4541	11.7248	11.7079	57.6537	8.93112	28.5269	14.329	3.46966	0.759253	3.62864	13.0005	11.8668	14.8581	2.39965	0.136484	1.00926	0.193592	0.048456
AB08-12	492.882	4.92882	1.17167		2.70136	37	0.00155621	0.328557	11.0982	0.227958	71.5216	11.3508	7.57464	36.9154	8.83091	14.5957	13.1878	2.55969	1.12601	4.69498	14.9134	14.0854	16.6139	2.45561	0.110649	0.671787	0.171705	0.103178
AB08-12	493.432	4.93432	1.17717		2.3904	37	0.000661839	0.252473	14.7726	0.24565	51.9821	10.8613	6.57994	25.184	9.10176	9.0675	9.40129	2.26093	0.857021	3.62032	11.924	13.7304	17.5716	2.68084	0.16368	0.808533	0.168621	0.0748351
AB08-12	493.982	4.93982	1.18267		2.46357	37	-0.00254155	0.166674	10.7539	0.25778	50.1693	10.6464	5.09147	13.2407	10.7726	9.74628	8.00287	0.946482	0.835076	2.55425	12.4406	12.8816	15.8213	2.51486	0.082258	0.718991	0.071475	0.0221523
AB08-12	494.532	4.94532	1.18817		2.43444	37	0.00961792	0.107729	11.3985	0.280576	51.8697	12.4983	3.0079	14.5082	10.4634	11.1115	4.80422	1.46674	0.59526	3.74136	15.7584	14.6887	17.2223	3.00548	0.0864947	0.861759	0.101298	0.0797616
AB08-12	495.082	4.95082	1.19367		2.27268	37	-0.0001942	0.0687306	10.165	0.245099	47.6519	10.7879	1.68313	19.5143	9.45159	11.3446	4.59847	1.75082	0.825108	3.80333	11.7492	12.2352	16.2375	2.58101	0.157585	0.587401	0.115115	-0.00446318
AB08-12	495.632	4.95632	1.19917		2.53667	37	0.00775634	0.0397792	11.5291	0.271892	66.7321	11.8156	1.01945	11.7733	11.6488	13.5611	5.98412	2.76452	0.554178	3.25215	13.6929	15.243	17.9694	3.0436	0.111122	0.421028	0.322931	-0.00474076
AB08-12	496.182	4.96182	1.20467		2.29625	37	0.00619547	0.022982	9.32164	0.23395	61.3779	11.6025	1.1663	20.4685	8.76563	5.04932	5.12708	1.99935	0.52321	3.59069	12.3962	13.1359	15.3999	2.24775	0.16907	0.802717	0.235869	0.136453
AB08-12	496.732	4.96732	1.21017		2.47149	37	0.01072	0.0243914	9.96026	0.222744	59.4345	10.2926	1.21671	22.9643	8.13237	25.5953	4.90229	0.978024	0.515226	3.23832	13.1893	12.0535	17.1527	2.74564	0.0748653	0.928935	-0.00282832	0.142352
AB08-12	497.283	4.97283	1.21568		2.25312	37	0.0137492	0.0263048	10.3152	0.205241	59.499	10.3266	0.995838	19.3358	8.13035	18.3795	6.56674	1.90356	0.560852	2.38869	13.3541	11.0778	16.6565	2.31062	0.103003	0.437287	0.113341	0.070938
AB08-12	497.833	4.97833	1.22118		2.32133	37	0.00932314	0.0345349	10.5593	0.191254	58.6763	10.1165	1.42753	56.1773	8.25046	5.35759	5.26504	1.06113	0.891006	1.53096	11.6557	12.2597	16.0949	2.55285	0.108761	0.809274	0.0951281	0.0483891
AB08-12	498.383	4.98383	1.22668		2.36411	37	0.0289621	0.0244569	9.8243	0.178643	47.5351	10.4862	1.1166	33.4832	6.59937	29.2396	8.74502	3.05318	0.749237	2.32563	12.411	16.0546	15.8638	2.65823	0.0820626	0.867761	0.195314	0.0756744
AB08-12	498.933	4.98933	1.23218		2.59118	37	0.0150825	0.0195224	11.521	0.169972	57.228	11.996	2.0014	17.6344	6.99482	20.3777	6.67908	1.91864	0.653998	3.69132	14.15	16.1358	18.797	3.24723	0.0546952	0.369206	0.296967	0.130323
AB08-12	499.483	4.99483	1.23768		2.48832	37	0.00966239	0.0321212	10.8886	0.164723	40.6829	11.2826	1.65964	26.6716	6.46739	14.5805	6.11658	2.02637	0.278282	1.66098	12.3134	11.8216	18.7689	2.78419	0.207617	0.485024	0.090225	0.045895
AB08-12	500.033	5.00033	1.24318		2.30736	37	0.0279371	0.0151307	10.4096	0.188551	54.6876	10.6506	1.16383	14.0665	7.10013	13.0095	4.14629	1.78908	0.544252	2.92532	9.68498	12.3949	17.2475	2.54596	0.0999543	0.469973	0.0423025	0.0444708
AB08-12	500.583	5.00583	1.24868		2.33795	37	0.0148346	0.0178549	10.46	0.187366	29.2643	10.9726	1.05098	21.9306	7.10914	15.185	6.14933	1.46788	0.455703	2.85415	10.5258	12.5754	14.4942	2.28036	0.0942608	0.830467	0.210103	0.0649173
AB08-12	501.133	5.01133	1.25418		2.23175	37	0.0108096	0.0134242	10.2983	0.188799	48.5886	10.6176	0.723607	15.5879	6.06263	10.0563	10.9322	1.68371	0.670126	3.32458	10.6249	12.2398	13.7845	2.0801	0.117882	0.785819	0.103508	0.110649
AB08-12	501.683	5.01683	1.25968		2.48493	37	0.0044725	0.0202425	11.8593	0.189191	50.3243	11.5725	0.556979	29.0789	7.04882	13.2364	10.4545	2.02718	0.634583	2.85136	12.9438	11.0279	15.3328	2.41924	0.146758	0.458091	0.217161	0.019595
AB08-12	502.233	5.02233	1.26518		2.26437	37	0.0127661	0.0239599	10.1841	0.19214	36.98	10.0573	1.07086	28.5187	4.91856	15.7446	5.13477	1.75314	0.655183	3.15731	9.67914	10.8426	14.9394	2.15137	0.0686861	0.474413	0.1012	0.0633393
AB08-12	502.783	5.02783	1.27068		2.22002	37	0.00845264	0.028515	10.5166	0.151125	39.9196	10.4758	0.499579	25.4719	5.91295	12.1347	6.42929	1.65642	0.374827	2.4119	11.2334	12.8507	14.9841	2.38276	0.0714351	0.449736	0.0620708	-0.0040807
AB08-12	503.333	5.03333	1.27618		2.12879	37	0.00361396	0.0360299	9.42894	0.148553	57.526	10.2386	0.596692	24.972	4.64246	6.56817	5.05685	0.920055	0.41667	2.24412	10.3377	11.2033	15.9999	2.70803	0.043935	0.296572	0.118017	0.104684
AB08-12	503.883	5.03883	1.28168		2.23877	37	0.000571153	0.0400518	9.73644	0.135272	47.0058	10.1478	0.99923	5.64411	4.15086	16.1974	5.56024	1.24213	0.381783	2.45952	13.6029	12.1134	16.3163	2.50847	0.0937729	0.612135	0.103185	0.133163
AB08-12	504.434	5.04434	1.28719		2.27439	37	0.0126744	0.0338809	10.5332	0.120724	53.2857	13.8129	0.895461	29.8374	4.20443	8.22389	3.92199	1.12648	0.467239	2.39234	12.2478	14.054	15.2661	2.62763	0.155394	0.720509	0.113515	0.0207481
AB08-12	504.984	5.04984	1.29269		2.30061	37	-0.00107715	0.0198917	10.0119	0.115566	64.969	10.5318	0.734684	14.0199	3.11974	8.27927	2.43039	0.814171	0.663552	2.20826	11.462	14.0006	17.4033	3.23789	0.0540955	0.315136	0.14531	0.0220388
AB08-12	505.534	5.05534	1.29819		2.03895	37	0.00468296	0.0176036	10.0101	0.0967142	59.2314	9.80503	0.29809	4.58696	2.84477	3.27	1.97261	0.678443	0.523378	1.52389	9.79495	13.7813	18.289	2.54972	-0.00137037	0.261924	0.119125	-0.00461863
AB08-12	506.084	5.06084	1.30369		2.17303	37	0.00689352	0.00981772	9.42105	0.0766006	50.3938	9.62694	0.550882	14.1769	2.3452	2.37062	2.29547	0.526762	0.314251	1.63973	13.2321	14.281	20.1847	3.32099	0.0280162	0.122305	-0.00328667	0.0234287
AB08-12	506.634	5.06634	1.30919		2.15704	37	-0.00530553	0.00643603	9.80744	0.05581	55.7603	10.83	0.422602	2.94087	2.91867	12.1005	1.94642	1.16776	0.356445	1.7044	10.7999	13.5822	18.3485	2.98546	0.0271668	0.0154692	0.0223092	0.0227183
AB08-12	507.184	5.07184	1.31469		2.1151	37	0.00760737	0.00583847	10.1039	0.0794048	43.0216	9.61946	0.185401	13.4033	2.71314	1.63098	0.718287	0.474823	0.21916	1.05271	10.0394	14.7001	18.9534	3.22863	0.0784196	0.158179	-0.0029626	0.0211186
AB08-12	507.734	5.07734	1.32019		2.61148	37	0.00719031	0.00345381	10.0557	0.0932007	35.3551	10.2953	0.273272	3.61558	2.5644	0.954789	1.51373	0.275624	0.328327	1.0955	10.3813	14.781	17.9143	2.54378	0.099246	0.104202	0.0196013	-0.00423411
AB08-12	508.284	5.08284	1.32569		2.29084	37	-0.00046664	0.00187779	10.3724	0.0992619	53.4994	10.4678	0.234035	4.44995	4.08455	1.63147	0.862264	0.167165	0.532346	1.56283	9.96928	14.7921	18.7703	2.9611	0.0511317	0.0614652	-0.0029223	-0.00441877
AB08-12	508.834	5.08834	1.33119		2.31443	37	0.0097203	0.00281393	9.61065	0.100119	55.1376	10.365	0.30287	0.839115	4.33776	0.263647	0.589162	0.369451	0.162427	1.21416	10.5167	12.9677	18.4234	2.82809	0.0543014	0.115488	0.0217243	-0.0046927
AB08-12	509.384	5.09384	1.33669		2.33192	37	0.00461291	0.00587027	10.7529	0.122539	44.8007	10.606	0.0322604	4.40813	5.47678	3.3315	0.214995	0.24941	0.185083	1.71406	10.7881	12.057	17.3846	2.94791	0.0848379	0.0674128	-0.00320507	0.022847
AB08-12	509.934	5.09934	1.34219		2.47185	37	-0.00396241	0.011274	10.2923	0.168207	58.0458	10.6428	0.556075	0.547989	6.34014	0.745146	0.397094	0.25817	0.101849	1.89334	12.2997	13.6412	16.9764	2.85405	0.0878177	0.0697806	0.0497647	-0.00501656
AB08-12	510.484	5.10484	1.34769		2.22084	37	-0.00164804	0.0240753	9.6975	0.184208	52.1149	10.471	0.622792	0.410679	6.68667	1.00035		0.175824	0.244004	2.08507	11.8845	13.7655	18.0106	2.86187	0.164098	0.064649	0.0461051	0.0219103
AB08-12	511.035	5.11035	1.3532		2.64894	37	0.0132666	0.039072	10.6546	0.215753	60.2932	12.1546	1.13811	1.13051	9.62893	0.433127	0.787245	0.12807	0.239995	3.12819	13.2949	14.5089	22.2135	3.03091	0.0926498	0.130251	-0.0035002	0.0249508
AB08-12	511.585	5.11585	1.3587		2.58507	37	0.0224219	0.057676	10.7185	0.237326	64.8401	11.9645	1.96138	1.2557	11.4954	0.479006	0.291052	-0.0159534	0.124201	2.45679	13.848	16.1496	19.626	3.3878	0.0601836	0.0166954	0.0791119	0.0245192
AB08-12	512.135	5.12135	1.3642		2.58331	37	0.0155075	0.0798681	10.7123	0.261509	54.1816	11.77	2.84262	3.61688	11.7263	2.11744	1.78532	0.0545301	0.32636	3.05054	15.0626	14.7177	21.2245	3.12977	0.182231	0.0717927	0.0511997	-0.00516121
AB08-12	512.685	5.12685	1.3697		2.62772	37	0.0148062	0.109796	10.8643	0.24896	53.7739	11.8118	4.10999	4.04338	11.8103	0.675481	2.73025	0.133015	0.131268	1.81368	13.9736	14.8869	19.0671	3.29218	0.259324	0.0176452	0.0545301	0.0573252
AB08-12	513.234	5.13234	1.37519		2.73405	37	0.0147756	0.120981	10.4008	0.268948	62.0426	11.6886	4.81606	9.46928	11.9062	0.658897	0.237871	0.349045	0.16641	2.91465	14.2766	16.5313	20.4158	3.60321	0.18932	0.017212	0.0248226	-0.00536198
AB08-12	513.785	5.13785	1.3807		2.73628	37	0.0209897	0.14499	11.6862	0.275607	78.7679	12.5025	4.63738	7.58316	10.9285	0.515363	1.28665	0.135408	0.293783	2.11196	14.8991	16.9435	21.306	3.44571	0.0647517	-0.0419127	-0.00370072	-0.0055958
AB08-12	514.335	5.14335	1.3862		2.64237	37	0.0193448	0.149807	10.7279	0.26633	68.4036	12.104	4.48205	3.10659	12.8868	1.9146	0.545934	0.274499	0.260948	3.40579	15.4862	14.6807	19.6759	3.67431	0.156675	0.0741941	-0.00352749	-0.00533385
AB08-12	514.885	5.14885	1.3917		2.70561	37	0.0164432	0.171967	10.7164	0.276811	83.6667	12.3522	4.95449	1.93237	12.7537	0.256612	2.12743	-0.0171408	0.253396	2.37435	13.8692	17.2901	23.3584	3.62948	0.164144	-0.0418553	0.0554348	-0.00558814
AB08-12	515.435	5.15435	1.3972		2.55436	37	0.00990779	0.159082	11.0147	0.294249	69.7232	12.1994	3.37265	1.84219	10.6178	8.59527	1.06091	0.7245	0.246532	2.31003	14.0667	16.2224	21.0685	3.43951	0.0951733	0.133799	0.053933	-0.00543674
AB08-12	515.985	5.15985	1.4027		2.58729	37	0.00579227	0.148844	11.0541	0.257207	57.473	11.877	4.46106	8.94393	9.29486	2.01511	0.613401	0.27703	0.186322	1.52055	14.1707	14.5192	18.6721	3.47611	0.285894	0.0748784	-0.00356002	-0.00538304
AB08-12	516.535	5.16535	1.4082		2.52704	37	0.018665	0.139199	10.5871	0.234834	70.6017	11.4083	3.43086	2.96162	9.99793	0.341949	0.16862	0.405172	0.178132	1.08723	12.6181	13.2003	17.5029	3.18827	0.12063	0.181721	-0.00340353	0.0830779
AB08-12	517.085	5.17085	1.4137		2.33993	37	0.0200697	0.101767	10.1668	0.239307	59.703	12.582	2.40236	3.87817	8.42184	1.16922	1.77234	0.239584	0.261067	2.97259	15.0584	13.4291	18.3558	2.80561	0.109121	0.214196	0.0708125	0.0219469
AB08-12	517.635	5.17635	1.4192		2.75278	37	0.0110642	0.0770522	10.1584	0.213901	69.2441	11.1355	2.37996	5.36675	7.66693	2.08286	0.861326	0.467855	0.184362	2.29455	11.2206	13.7057	17.1797	2.6353	0.103462	0.155857	-0.00291912	0.0208087
AB08-12	518.186	5.18186	1.42471		2.74997	37	0.0134059	0.0621149	11.0175	0.232174	66.7399	13.9594	2.34151	2.59653	8.35021	5.11776	2.64203	0.515655	0.203198	2.75994	11.1222	13.6044	17.6991	3.08687	0.287246	0.0676713	-0.00321737	-0.00486492
AB08-12	518.736	5.18736	1.43021		2.3848	37	0.128848	0.0451914	11.5905	0.210687	59.754	10.625	1.76192	3.08199	7.64062	3.69799	1.14741	0.542265	0.140682	2.89441	11.3867	11.4771	16.3379	2.60439	0.0793521	0.305568	-0.00299783	0.0213697
AB08-12	519.286	5.19286	1.43571		2.33097	37	0.282754	0.0321052	10.2199	0.192949	74.0501	10.5725	1.69338	3.43153	8.3874	1.39468	1.88291	1.13106	0.365823	2.21885	10.0418	12.3591	16.234	2.42449	0.0865798	0.174638	0.101397	0.07984
AB08-12	519.836	5.19836	1.44121		2.50628	37	0.44743	0.0235372	10.482	0.178066	60.462	10.4425	0.689551	5.75538	6.92677	6.20589	1.89937	0.826039	0.27016	2.30858	11.9967	11.9511	15.7574	2.44543	0.181689	0.236761	0.0782725	0.0830687
AB08-12	520.386	5.20386	1.44671		2.22048	37	0.661549	0.0160246	9.57384	0.183189	65.7704	11.574	0.819628	6.65035	6.33897	2.6162	1.11691	0.31621	0.237647	1.25682	9.20495	10.5856	13.6407	2.26295	0.0850346	0.0155929	0.0995877	0.0506576
AB08-12	520.936	5.20936	1.45221		2.00845	37	0.765184	0.0203063	9.71775	0.142577	39.992	8.68215	0.296415	8.71817	5.37901	1.60143	1.10927	0.612021	0.257549	1.07926	8.56484	10.5147	12.8192	1.94162	0.0803977	0.309594	0.0941572	-0.00459269
AB08-12	521.486	5.21486	1.45771		1.90077	37	0.805202	0.01023	8.35504	0.127704	40.7026	8.30676	0.666782	10.5129	4.2338	1.80859	0.787529	0.485479	0.387939	1.29378	9.78241	10.1331	13.3278	2.18521	0.0530001	0.308754	0.1666	0.0215925
AB08-12	522.036	5.22036	1.46321		1.88024	37	0.710798	0.00983786	7.6769	0.125125	49.8995	7.75972	0.372428	6.3169	5.80402	1.1102	1.075	0.450147	0.146997	2.10689	8.75105	8.92747	13.2203	2.21715	0.0491428	0.0590744	0.0645986	0.044289
AB08-12	522.586	5.22586	1.46871		1.80016	37	0.616799	0.00950568	7.48328	0.114359	56.282	7.78825	0.32064	6.35358	4.97695	1.18786	0.822001	0.676202	0.221155	1.0899	8.17252	10.7583	13.6128	2.15972	0.098738	0.103668	0.0417877	0.0439297
AB08-12	523.136	5.23136	1.47421		1.92991	37	0.468501	0.00432877	8.7336	0.142422	51.1136	8.51222	0.331127	5.07737	4.87139	1.18208	0.949795	0.164572	0.0883207	1.95163	9.68375	11.7334	13.1002	2.67872	0.0503384	0.0605117	0.0201388	-0.00435022
AB08-12	523.686	5.23686	1.47971		2.07348	37	0.380907	0.00482204	8.69203	0.145701	53.9571	9.4362	0.250858	2.69271	6.86306	0.630628	0.649582	0.179182	0.0961613	1.00061	9.75974	12.4621	12.9798	2.62361	0.0548072	0.116563	0.0219266	-0.00473641
AB08-12	524.236	5.24236	1.48521		2.29429	37	0.25935	0.00614954	9.32302	0.197619	53.0923	10.0568	0.287449	2.33025	10.0414	2.56103	0.555495	0.353295	0.207269	2.306	10.5294	15.4763	17.2631	2.75207	0.159419	0.0754935	0.0825531	-0.00542727
AB08-12	524.787	5.24787	1.49072		2.63395	37	0.185117	0.00770967	9.76747	0.232161	62.4084	11.0819	0.234079	1.87707	8.95124	1.50754	0.57889	0.291069	0.155296	3.20863	13.0155	17.0007	17.6063	3.59931	0.166133	0.0181553	0.026183	-0.00565584
AB08-12	525.337	5.25337	1.49622		2.60147	37	0.10115	0.00403241	9.0677	0.225836	67.6052	10.8632	0.164009	1.44314	10.066	0.930129	0.499309	0.283139	0.170748	2.20705	13.4065	14.9605	22.3456	3.06816	0.0963113	-0.0412082	-0.00363852	-0.00550175
AB08-12	525.887	5.25887	1.50172		2.73341	37	0.0509865	0.00247427	9.61484	0.240732	71.3124	11.5663	0.0375389	0.89067	10.6656	1.01125	0.446388	0.367097	0.0943176	1.99451	12.8926	16.2052	21.0889	3.47249	0.232576	0.0784429	0.0261064	-0.0056393
AB08-12	526.437	5.26437	1.50722		2.91194	37	0.0374548	0.00104718	11.3863	0.268596	63.6881	12.3763	0.038421	0.469855	12.7569	1.53845	0.389935	0.454408	0.117183	3.54844	15.3677	17.2857	23.3447	3.97601	0.16954	0.0802861	0.0572569	-0.00577181
AB08-12	526.987	5.26987	1.51272		2.96033	37	0.0423935	0.00378206	10.719	0.269977	75.132	12.5856	0.174644	0.273104	12.0444	0.930324	0.259898	0.221632	0.18182	3.32361	15.6867	17.3518	24.9853	3.68439	0.172086	0.206864	0.0271212	0.0276187
AB08-12	527.537	5.27537	1.51822		2.95425	37	0.0267757	0.00578877	10.8834	0.270924	73.2026	12.2192	0.650878	1.86704	12.6157	2.01732	0.737198	0.462282	0.308273	3.0524	15.1032	17.6499	23.0526	4.39703	0.137633	0.144506	0.0582489	0.0947878
AB08-12	528.087	5.28087	1.52372		2.77952	37	0.0287059	0.00492681	10.4492	0.263631	51.3461	11.1885	0.406962	0.54683	12.8623	2.27575	0.361201	0.202262	0.261567	2.01786	13.752	14.8922	22.8017	3.51269	0.2205	0.0171623	-0.00353585	0.0252049
AB08-12	528.637	5.28637	1.52922		2.7464	37	0.030882	0.00851717	11.1007	0.273703	87.1862	12.1564	0.94857	1.78753	12.8882	1.00811	0.640603	0.519235	0.194585	2.2552	14.63	17.456	22.7378	3.72513	0.231852	0.0781989	0.0855115	0.0265026
AB08-12	529.187	5.29187	1.53472		3.04547	37	0.0245751	0.00467609	10.9737	0.274633	59.8429	12.4703	0.30192	1.29696	11.6024	1.84147	0.319002	0.293367	0.19731	2.55741	17.0651	18.7061	24.4079	4.5679	0.336581	0.26228	0.0565494	0.0920222
AB08-12	529.737	5.29737	1.54022		3.25403	37	0.0195249	0.00743425	9.92689	0.256494	58.4036	11.8223	0.709255	0.0994312	11.0993	1.00345	0.78729	-0.0162352	0.315751	3.00273	13.9334	19.1189	22.7523	3.79489	0.249698	0.130259	0.052506	0.0249522
AB08-12	530.287	5.30287	1.54572		2.93762	37	0.0186133	0.00556305	11.3577	0.279706	78.9807	13.8272	0.916724	0.43427	13.1931	0.627019	0.461739	0.220676	0.139299	2.20157	16.8483	18.8842	20.6286	4.33538	0.205959	-0.0436911	-0.00385775	0.0608324
AB08-12	530.837	5.30837	1.55122		2.74242	37	0.0341803	0.00658506	11.2138	0.30123	70.837	12.3001	0.705748	1.79289	13.5124	1.80307	0.523178	0.0609067	0.0757921	2.03888	15.2623	18.5355	24.5855	4.23038	0.169333	0.141871	0.0571869	0.0271767
AB08-12	531.387	5.31387	1.55672		2.6661	37	0.0170106	0.00945066	10.4134	0.270371	83.0484	12.534	0.422212	0.605915	10.3766	1.05159	0.374736	0.28546	0.191992	2.7518	15.1859	17.957	24.4081	4.13291	0.261678	-0.041546	0.0256784	0.0261494
AB08-12	531.938	5.31938	1.56223		2.85767	37	0.0238031	0.00624442	11.103	0.29273	83.8758	12.2626	0.167	0.183196	11.3445	0.40097	0.898257	0.288304	0.354239	1.44945	14.4946	17.1482	24.6513	4.0061	0.164555	0.0179828	-0.00370489	0.0264099
AB08-12	532.488	5.32488	1.56773		2.84602	37	0.02182	0.00882786	11.52	0.302257	76.457	12.6391	0.36933	0.465835	11.7059	1.73111	0.253861	0.0604596	0.11618	2.29558	13.4278	18.2104	24.5019	3.89912	0.236004	-0.0428612	-0.00378447	-0.00572243
AB08-12	533.038	5.33038	1.57323		2.81001	37	0.0124149	0.00185781	11.17	0.289572	88.1658	12.893	0.106103	1.12151	10.886	0.326933	0.865564	0.378803	0.367962	2.4725	17.1577	17.3634	23.2397	3.82322	0.101867	0.0809443	0.0269389	0.027433
AB08-12	533.588	5.33588	1.57873		2.8544	37	0.00718482	0.0016315	10.3987	0.263694	66.6308	12.3265	0.22442	0.743239	12.7658	0.666329	0.0518841	0.205136	0.11009	2.30396	15.4987	17.1961	24.0443	3.9996	0.0949232	0.0754266	-0.00358608	-0.00542246
AB08-12	534.138	5.34138	1.58423		2.60051	37	0.0105291	-0.000186396	10.7204	0.275599	77.1071	11.9682	0.161247	0.327423	11.0093	0.747946	0.804574	0.278371	0.206575	2.94026	14.402	16.1995	22.61	3.79706	0.158885	-0.0405143	-0.00357725	0.0255
AB08-12	534.688	5.34688	1.58973		2.52556	37	0.00906979	0.000920027	11.1047	0.277868	88.5604	11.7349	0.0973823	0.732054	12.0795	0.875525	-0.0108401	0.202049	0.223076	2.90317	13.7375	15.5828	19.9729	3.63913	0.125188	-0.0400031	-0.00353212	-0.00534086
AB08-12	535.238	5.35238	1.59523		2.80156	37	0.0156001	0.000360825	11.1339	0.281832	72.3767	12.3297	0.0987714	0.0640733	11.3596	0.332137	0.365967	0.426478	0.245638	2.30166	14.9935	14.8501	20.9921	3.7722	0.0948284	-0.0405738	-0.0035825	-0.00541704
AB08-12	535.788	5.35788	1.60073		2.6839	37	0.0181532	0.00137107	10.9044	0.293753	65.5559	12.7052	0.360097	0.104813	10.2654	0.0271955	0.247515	0.515321	0.27296	1.70845	13.7636	16.7709	21.8101	3.9375	0.0976703	0.0776095	-0.00368987	-0.00557939
AB08-12	536.338	5.36338	1.60623		2.76832	37	0.0209462	-0.000113508	10.3833	0.295754	99.9388	12.4862	0.100161	1.17337	12.3113	0.590475	0.0525617	0.282703	0.111528	2.59483	12.724	15.422	21.2875	3.50614	0.0309677	0.0176335	-0.00363292	-0.00549327
AB08-12	536.888	5.36888	1.61173		3.21291	37	0.014899	0.00302471	11.4635	0.315561	76.458	13.3011	0.0386095	0.552872	12.999	1.6951	0.99728	0.456639	0.221509	1.36301	16.9272	14.9409	24.3437	3.9411	0.101535	-0.0434432	-0.00383586	-0.00580013
AB08-12	537.438	5.37438	1.61723		2.6784	37	0.00939426	-0.000190629	10.1621	0.29564	86.7823	12.4992	0.100866	0.103922	12.3405	0.0553475	-0.0112279	0.284692	0.171685	3.00703	15.0619	15.5914	21.1565	3.47901	0.19532	-0.0414343	-0.00365848	-0.00553193
AB08-12	537.988	5.37988	1.62273		2.78512	37	0.0126188	-0.000488367	11.1906	0.296418	85.0239	13.1275	-0.0282782	2.42773	12.703	0.440861	0.121652	0.21743	0.13725	2.03276	14.1781	16.7691	21.6879	3.4098	0.168824	-0.0430484	0.026607	-0.00574743
AB08-12	538.539	5.38539	1.62824		2.63339	37	-0.00193488	-0.00131553	10.6244	0.278946	68.0261	13.8194	0.0994925	0.368264	11.8358	0.194578	0.242068	0.0576508	0.149825	1.28228	14.9388	14.056	19.0195	3.6259	0.16028	-0.04087	-0.00360866	0.0257239
AB08-12	539.089	5.39089	1.63374		2.74617	37	0.022246	0.000303131	11.9762	0.310325	69.493	13.5895	0.104656	0.387374	11.7413	0.175225	0.18806	0.138891	0.137066	1.75755	15.0234	17.1897	20.6875	3.21163	0.134538	-0.0429909	-0.00379592	0.0270588
AB08-12	539.639	5.39639	1.63924		2.86811	37	0.0140955	0.00109781	11.0933	0.298294	108.348	12.6626	0.167631	0.301263	11.6764	0.431337	0.184243	0.0594118	0.0940494	3.32364	13.9564	14.9813	21.601	3.52592	0.231914	-0.0421184	-0.00371889	-0.00562327
AB08-12	540.189	5.40189	1.64474		2.66588	37	0.00596423	0.000292733	10.9449	0.29905	115.729	12.4576	0.293571	0.258389	10.1412	0.510488	0.117322	0.134127	0.191854	3.14454	15.0917	15.928	18.8512	3.195	0.162815	-0.0415162	0.02566	-0.00554286
AB08-12	540.739	5.40739	1.65024		2.56113	37	0.0097388	0.000625896	10.6699	0.268651	165.162	12.3505	0.159306	2.44323	11.7015	0.245402	0.361034	0.202168	0.261445	2.77803	14.3091	14.591	17.8122	3.27065	0.09355	-0.0400268	-0.00353421	-0.00534401
AB08-12	541.289	5.41289	1.65574		2.62428	37	0.0610275	0.000162341	11.2286	0.277114	241.156	12.0684	0.0991685	0.859006	9.78258	0.138133	0.11512	0.205755	0.0715068	2.44001	14.8902	14.9098	20.7083	3.23699	0.159758	0.13385	0.0251783	0.0256401
AB08-12	541.839	5.41839	1.66124		2.67373	37	0.316307	-0.000894357	12.4058	0.308669	324.406	12.7333	0.038693	4.72049	10.2757	0.296746	0.527526	0.695353	0.263578	2.33178	16.7889	16.5753	24.1002	3.80809	0.136247	0.0186587	-0.00384415	0.0606178
AB08-12	542.389	5.42389	1.66674		2.70091	37	0.6108	0.000977004	11.1669	0.316472	368.133	11.9487	0.222871	6.47251	10.5728	0.551212	1.11327	0.937847	0.244187	5.48367	15.6348	17.8489	23.4218	3.65904	0.190134	0.0749061	-0.00356134	0.0869299
AB08-12	542.939	5.42939	1.67224		2.82896	37	1.02034	0.0034455	12.5484	0.306429	468.054	13.028	0.171288	10.027	11.9312	0.794525	1.45446	0.844038	0.322222	5.98759	17.6342	17.2716	23.8236	4.1843	0.202877	0.325854	0.0570004	0.0599221
AB08-12	543.489	5.43489	1.67774		2.45766	37	0.987461	-0.00072143	11.2279	0.281561	474.844	11.3662	0.0970909	10.5904	10.8379	2.02066	1.71842	1.21774	0.393859	3.65286	14.1778	18.0019	21.7173	3.5683	0.0300184	0.0740693	0.0246508	-0.00532488
AB08-12	544.039	5.44039	1.68324		2.61654	37	0.970109	-0.00164406	12.8691	0.304226	444.062	12.4824	0.10446	9.87788	11.1886	0.674603	2.77907	1.31016	0.157305	4.20207	20.6009	17.4099	24.8208	3.96798	0.236275	0.0796907	-0.00378881	0.0270081
AB08-12	544.589	5.44589	1.68874		2.63824	37	0.824646	0.000782867	11.6402	0.300564	403.091	12.3905	0.166595	10.2975	11.6043	0.543366	1.67387	1.96371	0.313393	3.83372	17.4033	20.2483	26.0111	3.81834	0.230481	0.0179392	0.0258714	-0.00558852
AB08-12	545.139	5.45139	1.69424		2.62051	37	0.614357	-0.00057875	12.1058	0.296732	370.769	12.1822	0.166932	6.49689	11.5702	0.400806	0.897889	0.898912	0.213859	3.84146	14.9098	17.3262	22.7438	4.18286	0.264177	0.0179755	0.0259236	0.0263991
AB08-12	545.69	5.4569	1.69975		2.91794	37	0.497869	6.9639e-05	11.5001	0.305955	328.017	12.924	0.181018	6.74936	13.9836	0.621563	0.762373	1.38868	0.188456	3.87733	16.8073	18.052	25.7945	4.17166	0.214401	0.0194923	0.0281111	-0.00607233
AB08-12	546.24	5.4624	1.70525		2.72985	37	0.264524	-0.000247322	10.7259	0.314848	258.48	12.7554	0.0377367	2.55238	11.7131	0.173066	0.711737	0.600883	0.317907	3.6198	19.3611	20.7903	28.4994	4.41515	0.13288	0.382149	0.026244	0.0267253
AB08-12	546.79	5.4679	1.71075		2.86506	37	0.190192	0.000388495	12.4084	0.356588	213.611	13.4406	0.036325	3.40608	13.128	0.334583	0.431952	0.429619	0.247447	2.57767	18.2255	19.3503	27.1553	4.33185	0.419346	0.0175168	0.0252622	-0.00545693
AB08-12	547.34	5.4734	1.71625		2.75838	37	0.128983	-0.000753728	10.4759	0.33433	151.273	12.3123	-0.023405	3.10191	11.8353	0.584551	0.652403	0.633913	0.368872	3.37619	15.3869	17.183	23.0272	3.95457	0.3091	0.0152699	-0.00314597	0.0224257
AB08-12	547.89	5.4789	1.72175		2.89245	37	0.155045	-0.000465465	11.4611	0.350314	140.417	12.6356	0.147396	0.918536	10.725	1.24182	0.506079	0.524085	0.241898	2.57033	13.8343	15.1896	21.0871	3.77678	0.0572147	-0.0370341	-0.00326997	-0.00494446
AB08-12	548.44	5.4844	1.72725		2.7635	37	0.0510876	0.0010373	10.9642	0.358452	143.075	12.5339	0.0849002	0.929796	11.154	1.45637	0.260568	0.303107	0.161167	2.64158	13.0987	15.2796	20.2521	3.32102	0.164403	0.0647692	0.0215557	-0.00465629
AB08-12	548.99	5.4899	1.73275		2.65771	37	0.0850247	0.000893588	10.9008	0.353707	142.514	13.3494	0.260861	1.36046	10.4301	0.301984	0.789731	0.186327	0.170477	2.32653	13.1879	14.4787	19.0864	3.15283	0.1739	0.121211	0.0228009	0.0232191
AB08-12	549.54	5.4954	1.73825		2.26804	37	0.106284	0.00669258	9.37059	0.264453	119.136	11.8947	0.490707	0.952676	7.92487	0.734235	0.219288	0.523941	0.118042	1.74828	9.51573	9.84611	14.2155	2.29353	0.0865318	0.12165	0.101341	0.108042
AB08-12	550.09	5.5009	1.74375		2.56479	37	0.0574638	0.0179646	10.6004	0.246566	143.628	11.428	2.59751	1.38615	9.60334	2.2961	0.814738	0.510905	0.247833	3.37346	11.7116	11.2104	16.7943	2.95023	0.15211	0.229142	0.167377	0.030593
AB08-12	550.64	5.5064	1.74925		2.97495	37	0.055202	0.0365098	10.7303	0.293783	180.969	12.9714	4.6755	0.978297	13.0586	3.11128	1.30999	0.270013	0.119373	0.830156	12.7736	13.1157	17.6256	2.62962	0.08259	0.328392	0.146327	0.237573
AB08-12	551.19	5.5119	1.75475		2.55369	37	0.104256	0.0382802	10.2849	0.247417	138.487	12.9696	3.72403	1.18159	10.5248	2.15256	1.31493	0.240621	0.242908	3.15544	12.2442	12.1791	17.2152	2.58164	0.300061	0.700989	0.029445	0.211713
AB08-12	551.74	5.5174	1.76025		2.68524	37	0.0572408	0.0415419	9.86891	0.263111	100.686	12.6024	3.80157	1.21806	9.20096	3.042	1.708	0.526692	0.21778	3.09974	11.3207	11.9873	16.7864	2.7954	0.0321471	0.323389	0.20742	0.35274
AB08-12	552.291	5.52291	1.76576		2.79066	37	0.0744726	0.0379671	9.86726	0.292625	105.638	12.3323	3.80301	0.768247	8.99106	2.02417	1.59768	0.201795	0.280045	2.39305	11.0717	12.2121	15.8826	2.50494	0.156684	0.530802	0.0811366	0.177551
AB08-12	552.841	5.52841	1.77126		2.57458	37	0.0564587	0.0293009	10.1514	0.275591	125.863	11.9619	2.17885	0.418897	8.40912	2.42822	1.72032	0.334974	0.104474	1.94213	11.9966	10.9305	13.7535	2.05008	0.120616	0.401942	0.159947	0.230092
AB08-12	553.391	5.53391	1.77676		2.73343	37	0.0655855	0.0222843	9.4349	0.257434	73.3214	11.4593	1.60253	0.351545	7.60122	1.86974	0.714379	0.268067	0.143024	2.08956	10.184	10.6049	13.922	2.18261	0.122094	0.0724556	0.10679	0.173381
AB08-12	553.941	5.53941	1.78226		2.6723	37	0.031122	0.0178793	10.1269	0.252744	56.4356	12.8144	0.955943	0.303523	7.68446	1.97549	0.448458	0.909449	0.256903	2.00376	11.162	11.1602	13.7031	2.24649	0.099177	0.321289	0.0562018	0.123831
AB08-12	554.491	5.54491	1.78776		2.76606	37	0.0451297	0.0119824	10.9006	0.298059	69.2588	12.3914	1.37773	0.62181	8.80935	0.996626	0.833797	0.147115	0.101682	2.29455	11.6121	11.7082	16.6608	2.34239	0.178581	0.214671	0.0281447	0.0634015
AB08-12	555.041	5.55041	1.79326		2.43475	37	0.00900449	0.0064081	8.88096	0.236309	49.1264	11.1048	0.685467	0.594373	7.56996	0.786069	0.286259	0.263255	0.158757	2.41633	10.309	9.96393	12.286	1.95172	0.0591924	-0.0383142	0.023681	-0.00511537
AB08-12	555.591	5.55591	1.79876		2.57584	37	0.0268883	0.00450268	9.54293	0.256875	34.2463	12.3835	0.803583	-0.0115218	6.52176	0.508376	0.372919	0.208824	0.0528255	2.21435	10.128	10.2651	13.7248	1.87853	0.260409	0.0177191	-0.00365055	0.0260226
AB08-12	556.141	5.56141	1.80426		2.67811	37	0.0162349	0.00267441	10.6717	0.262686	45.0835	11.7589	0.164473	0.295588	8.78877	0.394903	0.0527919	0.50959	0.0725392	2.47524	9.87425	9.95646	14.0919	2.07409	0.194805	0.0767464	0.0255418	-0.00551734
AB08-12	556.691	5.56691	1.80976		2.5008	37	0.0301778	0.000760879	10.3962	0.242618	33.6979	11.1242	0.287676	0.253201	7.98202	0.137948	0.240957	0.42762	0.149138	2.43675	9.88412	10.3406	13.7808	2.07236	0.159545	0.133671	-0.0035921	0.0256059
AB08-12	557.241	5.57241	1.81526		2.51929	37	0.0259822	-0.000364483	10.9384	0.241703	28.0752	11.267	0.163165	0.369402	7.08641	0.110929	0.242816	0.207065	0.111125	1.15632	10.125	11.8072	10.7367	2.14985	0.030856	0.0175699	-0.00361981	-0.00547346
AB08-12	557.791	5.57791	1.82076		2.70086	37	0.0212766	0.00152113	11.3837	0.273448	37.6936	13.1737	0.0404431	0.367768	8.86601	0.278996	0.128598	0.147018	0.188557	2.43725	12.9762	10.897	14.9007	2.57992	0.0703035	0.149521	-0.00401803	0.0286421
AB08-12	558.341	5.58341	1.82626		2.96158	37	0.0069744	0.000211002	10.9088	0.244959	24.8574	13.7087	-0.0301508	0.200394	6.86221	1.6966	0.129709	0.482454	0.146339	3.1856	11.2437	11.869	12.8504	2.13139	0.0709105	0.0852413	-0.00405272	-0.00612804
AB08-12	558.891	5.58891	1.83176		2.85557	37	0.0867652	-0.000609671	11.6156	0.251486	56.6521	12.1836	0.107559	0.439165	8.54766	3.29816	0.672194	0.303583	0.267493	2.36641	11.7108	10.6452	15.1665	2.39433	0.103265	0.0189358	0.0273087	0.0952266
AB08-12	559.442	5.59442	1.83727		2.58115	37	0.0241799	0.00061408	10.5688	0.232632	55.6702	12.0295	0.367287	0.502854	5.90451	0.202929	0.912476	0.292868	0.0951786	2.28288	10.8695	11.7747	13.7644	2.18192	0.0320811	0.079159	0.0263448	-0.00569078
AB08-12	559.992	5.59992	1.84277		2.60433	37	0.0248596	0.00353926	10.6094	0.237523	37.301	11.9669	0.235269	0.502308	7.41821	0.581875	0.318113	0.0600599	0.217097	2.82015	9.74521	12.5763	10.7651	2.27537	0.133245	-0.0425778	0.0563918	0.0592823
AB08-12	560.542	5.60542	1.84827		2.66505	37	0.319525	0.0029474	10.9552	0.270966	27.9542	12.9969	0.445925	0.191576	6.62047	0.449371	0.531675	0.221627	0.11894	2.7673	11.2777	10.959	12.0866	1.90593	0.0677901	0.0814903	0.0581156	-0.00585838
AB08-12	561.092	5.61092	1.85377		3.51423	37	0.0404032	0.00259617	11.5364	0.34276	58.6713	14.0159	0.252844	0.114767	9.16637	0.970142	0.200166	0.231118	0.255171	3.17583	9.64614	10.4864	14.5697	1.86169	0.179452	0.08498	0.0606043	0.0288008
AB08-12	561.642	5.61642	1.85927		2.8392	37	0.0179467	0.00578682	11.7788	0.28251	23.267	13.4792	0.635819	0.227482	9.55042	1.20517	0.520565	0.295193	0.198538	3.11794	13.2862	7.69684	11.9311	1.97354	0.236562	0.0797875	0.0265539	0.027041
AB08-12	562.192	5.62192	1.86477		2.53115	37	0.00725315	0.00428931	9.97967	0.251326	33.3762	11.3905	0.519086	0.389284	7.73808	0.803527	0.171325	0.126531	0.087455	4.33179	10.302	9.03303	11.4076	1.34851	0.060507	0.128686	0.0242069	0.0246509
AB08-12	562.742	5.62742	1.87027		2.90544	37	0.100446	0.00620043	10.3688	0.300466	50.3524	13.4267	0.586069	0.110906	9.58635	0.574014	0.604262	0.142859	0.225465	1.80776	9.14403	9.80794	13.9797	2.07549	0.0683149	0.208461	0.0585655	-0.00590373
AB08-12	563.292	5.63292	1.87577		3.10558	37	0.0430846	0.00685188	11.7975	0.281733	20.7789	13.1736	0.586032	0.685932	10.0112	1.11918	1.01503	0.303807	0.26769	2.50829	12.1643	10.068	15.0778	1.99796	0.0683105	0.208448	0.0273288	0.0278301
AB08-12	563.842	5.63842	1.88127		2.94149	37	0.0159037	0.00795349	11.3416	0.299403	55.2141	12.6039	0.233595	0.223841	8.64262	1.50443	0.970461	0.213523	0.19536	1.72828	10.7804	10.9318	15.6585	2.24861	0.0988042	0.199296	-0.0037327	-0.00564416
AB08-12	564.392	5.64392	1.88677		2.73473	37	0.00557359	0.00555932	10.266	0.262157	27.4953	11.9514	0.514206	0.421663	10.3829	0.902279	0.710394	0.0547266	0.105164	2.20086	10.5168	10.7175	14.0196	2.11213	0.0906756	0.0720514	0.0239793	-0.00517981
AB08-12	564.942	5.64942	1.89227		3.80937	37	0.0163778	0.00610536	10.4929	0.307198	47.5023	13.8828	0.521204	1.02141	10.018	0.852324	0.884052	0.710994	0.269507	2.10207	11.6202	12.5592	15.684	2.90237	0.0687741	-0.0445163	0.0275143	0.028019
AB08-12	565.492	5.65492	1.89777		2.99422	37	0.0163408	0.00407365	10.7737	0.293073	45.274	13.2773	0.245425	0.97784	11.7037	1.45891	0.400621	0.224336	0.184039	2.66036	12.4868	13.1845	17.155	3.00699	0.209375	0.209388	0.0274521	0.0618413
AB08-12	566.043	5.66043	1.90328		2.70304	37	0.0482417	0.00591267	9.86407	0.287734	40.6732	12.2873	0.303484	0.546189	11.6036	1.14512	0.65294	0.138656	0.136834	2.0266	12.4105	14.9502	16.9644	3.54982	0.202315	0.141016	0.0265264	-0.00573002
AB08-12	566.593	5.66593	1.90878		2.93019	37	0.0317915	0.00356365	9.72258	0.28598	39.456	12.033	0.174494	0.191416	12.9374	1.16979	0.463342	0.460839	0.139782	2.62605	13.0301	16.0465	21.8899	3.2095	0.0329984	0.0187898	0.0580672	-0.00585349
AB08-12	567.143	5.67143	1.91428		3.02532	37	0.0221181	0.000647004	10.7066	0.27563	45.7771	13.2218	0.178739	0.196073	11.6482	0.398392	0.752776	0.0633487	0.207535	1.55133	12.2639	16.2382	19.4777	3.82694	0.211702	0.0834031	0.0594798	-0.00599589
AB08-12	567.693	5.67693	1.91978		2.89941	37	0.0245635	0.000665607	11.2432	0.334425	74.5384	13.7077	0.117459	-0.0134463	13.0452	0.560237	0.435207	0.419345	0.222973	2.27839	14.2431	18.0143	23.9815	4.07543	0.265677	0.0206786	-0.0042603	0.0303691
AB08-12	568.243	5.68243	1.92528		2.70958	37	0.0342918	0.000322358	13.0161	0.324822	70.6261	12.6613	0.252618	0.411944	12.2977	0.436879	0.0584035	0.1477	0.254943	2.30368	16.7108	19.2217	25.4106	3.81579	0.106851	-0.0457176	-0.00403669	0.0287751
AB08-12	568.793	5.68793	1.93078		2.57493	37	0.0312364	-0.000581335	10.7799	0.29689	78.6406	12.2296	0.175459	0.192475	12.2822	0.149486	0.192847	0.142427	0.119498	3.0597	15.1393	17.3026	23.9056	4.37448	0.17289	0.0188937	-0.00389255	-0.00588586
AB08-12	569.343	5.69343	1.93628		2.83237	37	0.0238745	0.00156075	10.8804	0.322061	73.7292	12.4795	-0.0318432	0.166612	13.3723	0.0647532	0.212052	0.15661	0.131399	3.36441	16.647	18.7406	26.2863	4.04598	0.382135	-0.0484756	-0.0042802	0.0305109
AB08-12	569.893	5.69893	1.94178		2.75522	37	0.0152651	0.00256752	11.5742	0.293775	86.7832	13.1654	-0.0307241	0.725578	13.224	-0.00160198	0.0597502	0.406497	0.171461	2.06035	16.1568	14.7785	25.6795	4.65277	0.220482	-0.0467719	-0.00412977	-0.00624455
AB08-12	570.443	5.70443	1.94728		2.60977	37	0.0306737	-0.00123684	10.7756	0.323706	82.2595	12.7549	-0.0291225	0.070011	12.2298	0.0592206	0.193934	0.546693	0.204875	2.23395	15.0466	14.791	22.5368	4.47674	0.13874	-0.0443338	-0.0039145	-0.00591904
AB08-12	570.993	5.70993	1.95278		2.19968	37	0.0116281	-0.00088542	8.84055	0.246191	51.2372	10.0429	-0.0240139	0.3294	11.0388	0.47455	0.0467008	0.317718	0.221319	3.23233	15.1257	14.6171	21.7248	3.58166	0.172328	-0.0365569	0.0225948	-0.00488074
AB08-12	571.543	5.71543	1.95828		2.50335	37	0.0195375	-0.000606138	9.79706	0.298576	75.8286	11.239	0.0358593	0.326085	13.4028	0.192096	0.23898	0.424112	0.186459	2.6725	14.9104	16.9643	24.7085	4.40759	0.190203	0.0749332	-0.00356263	0.0253958
AB08-12	572.093	5.72093	1.96378		2.80408	37	0.0171867	-0.000452398	13.3621	0.326383	85.0743	12.4261	0.0397269	0.818013	13.1291	0.243435	0.126321	0.225774	0.22792	2.39409	16.5185	17.6097	25.6543	4.37952	0.281546	-0.0447004	-0.00394687	-0.00596799
AB08-12	572.644	5.72644	1.96929		2.75744	37	0.0608672	0.000426422	11.6073	0.284156	69.3053	13.05	0.247894	0.154195	14.4712	0.121391	0.0573113	0.226594	0.185891	2.54496	13.0629	19.9189	26.458	4.62001	0.211482	-0.0448627	0.0277284	0.0624636
AB08-12	573.194	5.73194	1.97479		2.48883	37	0.226639	0.00199563	10.1501	0.282893	81.9628	12.5321	0.366493	3.82133	13.3685	0.610384	1.5691	0.756714	0.318439	4.70417	18.9655	16.693	27.1036	4.80573	0.301585	0.078988	0.236591	0.221461
AB08-12	573.744	5.73744	1.98029		2.68183	37	1.6926	0.00308321	13.8293	0.302566	84.7201	13.2654	0.318771	31.2265	14.1694	3.98298	8.36502	5.15072	1.15573	10.702	23.636	24.3286	31.8879	5.03724	0.17679	0.470118	0.441821	0.613042
AB08-12	574.294	5.74294	1.98579		2.72128	37	3.34482	0.00629058	17.2107	0.301657	96.7744	12.5269	1.45771	52.4915	14.7611	5.21066	11.1588	7.46187	0.911907	16.3374	31.7966	24.106	30.7238	5.37689	0.171432	0.580765	0.335796	0.461062
AB08-12	574.844	5.74844	1.99129		2.65173	37	3.98413	0.0176741	17.3896	0.288249	87.6347	12.3899	2.20034	55.7853	13.9527	5.8122	13.8722	7.19499	0.758332	15.463	29.2683	25.6032	31.566	5.35283	0.12523	0.474482	0.279131	0.605246
AB08-12	575.394	5.75394	1.99679		2.59852	37	4.02293	0.0145338	18.3905	0.296624	95.0615	16.2534	1.45467	51.4033	12.713	6.12684	10.8708	6.74194	0.947214	16.3119	27.5929	22.4856	30.1361	4.99043	0.0616756	0.75851	0.334867	0.421067
AB08-12	575.944	5.75944	2.00229		2.61119	37	4.27772	0.0104154	17.4961	0.315718	103.345	13.1688	1.0045	60.0794	10.3646	6.03204	11.944	7.88225	0.810674	15.4627	30.3516	24.0552	29.4219	5.31002	0.262818	0.375542	0.291061	0.631115
AB08-12	576.494	5.76494	2.00779		2.46652	37	4.10397	0.00726645	16.3866	0.265412	107.402	11.1868	1.32173	54.5054	10.5015	5.0086	13.1902	7.98293	0.953055	13.3157	30.2959	23.2878	27.7383	4.73523	0.238588	0.395035	0.317743	0.515133
AB08-12	577.044	5.77044	2.01329		2.64457	37	5.05818	0.00588764	19.282	0.298357	111.507	12.6325	0.950042	69.8243	9.78	6.18311	13.0517	8.58048	1.24234	20.1732	31.9478	25.3053	28.5916	5.2718	0.165388	0.439798	0.443115	0.798724
AB08-12	577.594	5.77594	2.01879		2.72014	37	5.28934	0.00343648	19.9277	0.29819	92.6689	12.994	0.372754	79.1874	9.61624	6.99488	15.2641	9.35262	1.02639	23.2989	31.6395	22.3904	28.3495	4.53065	0.20392	0.451126	0.485085	1.14932
AB08-12	578.144	5.78144	2.02429		2.43952	37	4.97934	0.00290749	18.0999	0.245862	100.242	12.0629	0.338925	68.8001	9.98581	6.03647	13.8179	7.42998	0.876881	18.8148	27.6606	20.5325	26.3108	3.75527	0.12309	0.466373	0.302144	0.804956
AB08-12	578.694	5.78694	2.02979		2.73125	37	4.63695	3.94655e-05	18.6794	0.290451	122.763	11.8875	0.237248	67.1958	11.7263	5.35328	13.6204	9.04842	0.97772	19.0417	29.936	22.6659	23.5735	4.1315	0.338466	0.447761	0.481467	0.518375
AB08-12	579.244	5.79244	2.03529		2.39341	37	3.74112	1.27935e-05	15.3316	0.294623	105.14	11.569	0.165746	52.1837	10.7443	4.19325	11.8559	6.50235	0.809077	10.2824	23.5092	19.0417	22.1108	3.38202	0.0973313	0.0773402	0.202238	0.343927
AB08-12	579.795	5.79795	2.0408		2.59712	37	2.8755	-0.00184263	14.786	0.287222	116.024	11.7388	0.445938	36.2827	10.4773	3.6065	8.4143	4.69424	0.642925	11.6689	20.8905	17.8681	23.3971	3.50875	0.137322	0.206866	0.151105	0.328916
AB08-12	580.345	5.80345	2.0463		2.62842	37	2.09193	0.000232257	14.3565	0.294544	92.3215	12.3239	0.108542	26.7749	10.2788	2.38115	5.99524	3.2279	0.355123	8.04158	19.7029	17.6314	25.2871	3.59869	0.104209	0.401285	0.153538	0.232162
AB08-12	580.895	5.80895	2.0518		2.76494	37	1.42075	-0.00111418	12.9165	0.302844	96.3486	13.4231	0.183087	20.7731	11.8684	1.76342	4.47515	1.48827	0.432306	5.81687	16.6298	17.9195	22.76	3.71286	0.180406	0.348299	0.0609266	0.0991451
AB08-12	581.445	5.81445	2.0573		2.91689	37	0.868459	-0.000767416	12.5316	0.299914	70.2971	12.4062	0.110775	12.7598	10.4903	2.61717	2.87663	1.05808	0.210286	6.18665	15.0785	17.19	24.881	3.47919	0.214508	0.279529	0.0602683	0.13279
AB08-12	581.995	5.81995	2.0628		2.64545	37	0.535765	0.000265483	12.5691	0.323355	87.7975	12.7027	0.181328	7.98866	10.3154	0.685046	1.89244	0.644735	0.21054	3.5952	15.6457	18.4848	20.5843	3.88236	0.250863	0.0195256	0.0281592	0.0634341
AB08-12	582.545	5.82545	2.0683		2.1911	37	0.26843	0.000317265	8.57501	0.24565	69.61	10.5155	0.0868472	3.66926	7.24448	0.683054	0.653239	0.699659	0.130783	2.02379	12.9685	12.217	20.2329	3.32572	0.0551157	0.0152895	0.04725	-0.00476307
AB08-12	583.095	5.83095	2.0738		3.1031	37	0.304405	0.00130469	10.7155	0.285136	78.2495	12.2931	0.377988	3.04432	10.4738	0.749726	0.803212	0.381242	0.307474	5.12976	13.7426	16.6355	22.5964	3.72706	0.17203	0.269463	0.0271124	0.0276097
AB08-12	583.645	5.83645	2.0793		3.19962	37	0.148853	0.00405122	11.4565	0.298426	60.5257	13.2959	0.614203	1.88121	10.4288	1.10949	0.633269	0.318412	0.214154	2.62886	14.1451	15.0514	25.7575	3.91424	0.0715943	0.152266	0.0941113	0.205943
AB08-12	584.195	5.84195	2.0848		2.61888	37	0.101181	0.00585658	11.1173	0.257591	68.3212	12.4859	0.399933	1.01262	9.12633	0.942186	0.294025	0.198769	0.238252	1.48414	11.2218	13.9979	23.9213	3.69814	0.185513	0.297964	0.0521217	0.0247696
AB08-12	584.745	5.84745	2.0903		3.10493	37	0.0708144	0.00809533	10.0299	0.311417	94.8676	12.7515	0.939657	1.15236	10.7545	1.22559	0.820023	0.307709	0.121393	1.68894	14.0303	15.3363	23.3729	3.84986	0.175631	0.594989	0.0593139	0.0281875
AB08-12	585.295	5.85295	2.0958		3.26654	37	0.0763164	0.0130836	9.46924	0.279617	86.8629	13.9627	1.27811	0.731962	10.8744	3.07913	1.50448	0.467933	0.248252	2.94863	13.4095	15.6384	24.3413	3.94952	0.209856	0.273466	0.0904069	0.12991
AB08-12	585.845	5.85845	2.1013		3.24263	37	0.128206	0.0159265	9.75586	0.286328	79.3513	13.3486	1.66734	0.721743	12.0488	2.07361	1.34754	0.301608	0.098019	2.62924	11.9872	14.7095	21.5198	3.93828	0.102593	0.14423	0.0891447	0.195075
AB08-12	586.396	5.86396	2.10681		3.17107	37	0.058781	0.0187504	11.606	0.29339	68.8051	13.4535	2.20835	0.843396	9.93076	1.89168	1.07479	0.540863	0.13984	3.04414	12.2428	15.8591	25.9664	4.20954	0.137261	0.520066	0.0271093	0.0945313
AB08-12	586.946	5.86946	2.11231		3.29069	37	0.0837169	0.0182372	10.5337	0.28441	85.4101	13.5773	2.02599	1.14044	11.7395	2.73125	1.15469	0.385195	0.141306	1.39055	14.6862	15.8299	24.6343	4.07625	0.244042	0.715465	0.0900072	0.0955224
AB08-12	587.496	5.87496	2.11781		3.28773	37	0.037091	0.0176639	9.72169	0.278102	83.0682	12.7348	1.45547	0.798725	10.3015	2.00201	1.27228	0.299892	0.160003	2.19932	12.0076	15.9105	24.5562	3.93771	0.10201	0.14341	0.0886375	0.0274714
AB08-12	588.046	5.88046	2.12331		3.2171	37	0.0430326	0.0168052	9.65739	0.304507	63.4666	12.866	1.46027	1.04543	11.9596	1.94862	1.4121	0.300881	0.202363	2.34535	12.5748	17.1225	25.4288	3.73158	0.310508	0.268998	0.150794	0.0609705
AB08-12	588.596	5.88596	2.12881		3.2442	37	0.0780872	0.013585	11.7329	0.302904	84.6621	13.1595	1.11275	0.373564	13.3227	1.93024	0.703228	0.485863	0.103216	2.0362	13.8305	16.1017	23.6018	3.84634	0.254518	0.349978	0.0285694	0.0290934
AB08-12	589.146	5.89146	2.13431		2.77753	37	0.0477216	0.00857657	9.33561	0.280955	92.2947	12.9215	1.27511	0.2623	11.2787	1.03787	0.77169	0.442988	0.0739776	2.52432	13.1178	16.1071	22.758	3.89716	0.165279	0.198681	0.0558178	0.0265261
AB08-12	589.696	5.89696	2.13981		2.92277	37	0.0221606	0.00761845	10.2029	0.293325	74.7098	12.0573	1.20205	0.398727	10.6264	1.08974	0.604696	0.142961	0.204491	1.80906	12.5293	15.8049	20.7928	3.7155	0.173539	0.208611	0.0273502	-0.00590796
AB08-12	590.246	5.90246	2.14531		2.87038	37	0.0418988	0.00458985	10.3392	0.310423	71.1488	12.2871	0.373699	0.0282002	10.2954	0.830342	0.0554021	0.376916	0.138269	1.91042	13.848	13.2561	21.653	3.68477	0.135719	0.0805409	0.0268047	-0.00579013
AB08-12	590.796	5.90796	2.15081		2.5729	37	0.0108897	0.00273736	9.34332	0.268567	74.7451	11.3746	0.231532	0.221864	10.5805	0.543929	0.0535284	0.592965	0.213648	1.9786	13.0422	14.5339	24.7116	3.8223	0.0315373	-0.0419015	0.0258981	-0.0055943
AB08-12	591.346	5.91346	2.15631		2.80739	37	0.0455428	0.00122588	10.1231	0.315028	85.2641	12.3456	0.25392	0.456753	10.9091	0.43913	0.272175	0.232101	0.212358	2.46118	13.6573	16.4129	24.5022	4.53685	0.0345868	0.0196942	0.0608622	-0.00613525
AB08-12	591.896	5.91896	2.16181		2.68809	37	0.0287425	0.00164876	11.1142	0.378694	77.5936	12.1712	0.253951	0.11527	11.6681	0.754012	0.129877	0.483082	0.322144	2.89844	14.9521	14.2507	23.258	4.14633	0.143826	0.0196967	0.125798	0.0289269
AB08-12	592.446	5.92446	2.16731		2.69355	37	0.0285041	0.0025924	11.1701	0.287678	93.4346	12.5799	0.183836	0.11585	10.2679	0.5996	0.202054	0.233298	0.213453	2.91302	13.8205	17.2452	24.3154	4.12099	0.107955	0.0857816	-0.0040784	-0.00616688
AB08-12	592.996	5.92996	2.17281		2.74109	37	0.0238329	0.00323053	11.0004	0.30855	82.3923	12.7653	0.258682	0.204393	10.9209	0.447366	0.349771	0.236454	0.171619	1.91389	13.2553	18.374	23.6913	4.28222	0.146505	-0.046815	0.0620037	0.0294658
AB08-12	593.547	5.93547	2.17832		2.77823	37	0.0145472	0.00287549	11.0487	0.317327	76.1216	12.7203	0.252708	1.00686	11.3598	0.405705	0.41251	-0.0187292	0.1895	2.88425	12.2135	16.9404	21.3863	4.2405	0.143122	0.150268	0.0282668	-0.00610596
AB08-12	594.097	5.94097	2.18382		2.76594	37	0.0269536	0.00155885	11.5367	0.324646	77.9494	13.4698	0.262542	0.428126	9.77881	0.193659	0.502135	0.326462	0.196874	2.69533	13.8348	16.5511	26.5161	4.32235	0.186334	0.0203629	-0.00419525	-0.00634357
AB08-12	594.647	5.94647	2.18932		2.84366	37	0.0338066	0.00219777	10.2596	0.310343	61.018	13.6059	0.38837	0.322381	9.46168	0.554196	0.0575772	0.0635765	0.186753	1.98542	12.7615	17.8226	23.4207	4.70906	0.0696307	0.212477	-0.00397957	-0.00601744
AB08-12	595.197	5.95197	2.19482		3.12255	37	0.0555033	0.00130075	11.0346	0.303042	86.5028	12.7556	0.257609	0.333467	11.5801	0.445509	0.276129	0.235473	0.0818349	2.64469	14.3238	18.2977	25.5965	4.94106	0.330577	0.219783	0.028815	-0.00622437
AB08-12	595.747	5.95747	2.20032		2.72431	37	0.00961432	0.000884012	11.2251	0.331758	96.953	12.7453	0.182159	0.157308	10.614	0.437366	0.129339	0.147865	0.145922	2.4513	16.1779	19.0412	28.3377	4.15205	0.0707087	0.28115	-0.00404118	-0.0061106
AB08-12	596.297	5.96297	2.20582		2.75309	37	0.0105755	0.00073118	10.9813	0.309847	69.5155	12.4891	0.179095	0.447267	11.3008	0.61496	0.266522	0.145378	0.143468	2.69528	15.1819	17.1318	26.6399	4.42012	0.10517	0.276421	-0.00397321	0.0283226
AB08-12	596.847	5.96847	2.21132		2.65447	37	0.0357879	0.0022045	11.099	0.321548	71.999	12.7406	0.0401788	0.071393	11.2915	0.586863	0.407776	0.804341	0.187325	2.5646	15.9801	16.4129	25.7418	4.28239	0.141479	0.342296	0.0598765	-0.00603589
AB08-12	597.397	5.97397	2.21682		2.84575	37	0.0207312	-4.2423e-05	11.2745	0.309582	65.5279	13.142	0.111907	0.158	12.2394	0.565251	0.201091	0.148515	0.25635	3.19051	14.2162	17.5016	27.8391	4.52701	0.180281	0.151044	-0.00405896	-0.00613748
AB08-12	597.947	5.97947	2.22232		2.76613	37	0.0323642	-6.85025e-05	11.4493	0.340067	94.5467	12.9998	0.108652	0.0704829	12.3122	0.27364	0.333465	0.225431	0.184937	0.834539	13.1752	18.043	27.1301	4.50692	0.139676	0.14665	-0.00394088	-0.00595894
AB08-12	598.497	5.98497	2.22782		2.43536	37	0.00921864	-0.000156462	9.81247	0.318458	45.6026	10.8408	0.216745	0.244132	9.68937	0.321099	0.110849	0.269516	0.312418	2.72241	11.6578	13.837	24.1092	4.16709	0.0606001	0.0728472	0.0519517	0.0246888
AB08-12	599.047	5.99047	2.23332		2.77691	37	0.0575411	0.000472296	9.64293	0.305336	34.4954	12.2648	0.0370116	0.375249	11.8888	0.31238	0.311145	0.513539	0.112884	1.57056	14.1341	17.387	24.089	4.60129	0.262303	0.0178479	-0.00367711	-0.00556009
AB08-12	599.597	5.99597	2.23882		2.79779	37	0.0293745	0.0014005	10.8494	0.309381	58.889	12.252	0.240355	0.230319	10.2666	0.385874	0.594412	0.0613583	0.242567	1.91615	13.8021	16.8803	28.8015	4.32712	0.136126	0.142923	0.0268851	-0.00580749
AB08-12	600.148	6.00148	2.24433		3.28506	37	0.0434949	0.000543299	11.2567	0.340371	76.2943	14.3198	0.264711	0.298159	11.8336	0.654691	0.209561	0.241965	0.0383272	3.02124	15.4893	20.5651	26.4105	5.06531	0.111965	0.225843	0.0296094	-0.00639598
AB08-12	600.698	6.00698	2.24983		3.12559	37	0.00971175	-0.000524488	11.939	0.337919	97.9355	13.0562	0.255463	0.287742	9.00746	0.315118	0.202239	0.149363	0.213648	2.47614	15.8767	20.9355	27.1613	4.83042	0.254567	0.283999	0.061232	-0.00617252
AB08-12	601.248	6.01248	2.25533		3.03238	37	0.0215724	-0.00072136	10.9432	0.2898	88.9139	13.5828	0.183633	0.158582	11.8405	0.66215	0.48761	0.23304	0.147103	2.76358	16.3088	18.0408	31.6978	4.97089	0.14439	0.0197739	0.0285173	0.0290403
AB08-12	601.798	6.01798	2.26083		2.83096	37	0.023246	-4.08034e-05	10.4761	0.291748	69.3603	11.8359	0.175975	0.0287508	9.09993	0.240791	0.124949	0.223322	0.0987309	1.52735	17.1391	19.6963	25.8762	4.92954	0.138368	0.0189492	-0.003904	-0.00590317
AB08-12	602.348	6.02348	2.26633		2.70285	37	0.0454047	-0.000557125	10.5026	0.249288	64.2443	11.8284	0.313447	0.19353	9.18383	0.180671	0.193904	0.304568	0.204843	3.07648	16.4695	18.8331	30.6542	4.53159	0.138719	-0.044327	0.0273973	-0.00591813
AB08-12	602.898	6.02898	2.27183		2.51751	37	0.0122528	-0.0012173	10.6613	0.221191	44.6036	12.5071	0.0371491	0.0660095	6.99579	0.199005	0.118124	0.211124	0.1732	2.10627	13.4311	16.1598	24.935	4.58701	0.197044	0.137342	-0.00369076	-0.00558074
AB08-12	603.448	6.03448	2.27733		2.32738	37	0.0251763	-0.000377488	9.96656	0.191618	46.1832	13.0963	0.158104	0.0627326	6.42985	0.107489	0.173773	-0.0162683	0.0887045	2.2535	12.6048	17.053	25.9439	4.1207	-0.00157363	-0.0397248	0.0245528	-0.00530369
AB08-12	603.998	6.03998	2.28283		2.32299	37	0.0115149	-0.00144709	9.43475	0.158264	37.0004	10.619	0.147935	0.369449	5.35301	0.100575	0.162595	0.0524311	0.189521	2.10855	12.5405	16.6125	21.4162	3.66037	0.057424	0.0690292	-0.00328193	-0.00496255
AB08-12	604.548	6.04548	2.28833		1.9445	37	0.0271888	-0.000836897	7.91955	0.143088	43.984	9.03656	0.0278902	0.195315	4.21795	0.0419195	-0.00850388	0.272741	0.115043	1.1835	10.2727	15.9658	20.4243	3.06679	0.0982079	0.103112	-0.00277089	-0.00418982
AB08-12	605.098	6.05098	2.29383		2.11349	37	0.00258834	-0.00103739	8.4958	0.146948	38.1498	8.98011	0.0297753	0.115151	4.9629	0.0447528	0.0946774	0.108238	0.0588088	1.90054	12.5831	14.5791	20.5163	3.19867	0.0517592	0.0143584	-0.00295817	-0.004473
AB08-12	605.648	6.05648	2.29933		1.72743	37	0.00111225	-0.000792199	7.95627	0.14713	30.2495	8.52625	0.172038	-0.00867657	4.69756	0.0202615	0.0879848	0.157256	0.0992654	1.66753	9.75407	12.6322	17.6576	2.98814	0.0481005	0.0133434	-0.00274907	-0.00415682
AB08-12	606.198	6.06198	2.30483		1.94791	37	0.00967829	-0.00107275	8.23902	0.178931	29.884	10.2608	0.0320639	1.22996	6.43434	0.0481927	-0.00977646	0.0508913	0.063329	1.3606	12.3896	14.5317	22.0932	3.22784	0.141488	0.015462	0.0222988	-0.00481681
AB08-12	606.748	6.06748	2.31033		2.36025	37	0.00960719	-0.00143964	9.73924	0.206094	51.6956	10.7935	-0.0250833	0.0603007	6.70525	0.0771643	0.0487804	0.0538632	0.212937	2.65019	11.732	15.3803	22.5197	4.17121	0.14975	-0.0381848	-0.00337157	0.0531658
AB08-12	607.299	6.07299	2.31584		2.28749	37	0.017503	-0.00104988	10.5335	0.237556	55.5116	10.3759	0.284922	0.138488	9.39944	0.0538229	0.0514735	0.0568369	0.14771	2.15803	12.7851	15.9925	23.1248	4.20987	0.285708	-0.0402929	0.0249039	-0.00537955
AB08-12	607.849	6.07849	2.32134		2.47123	37	0.0214652	-0.00150983	10.9027	0.243791	60.0451	11.9324	-0.0286297	0.230771	10.6463	0.0283629	-0.0118103	0.378787	0.138956	2.33427	14.0918	17.2986	24.7179	4.56468	0.239982	0.0186787	-0.00384826	0.0274319
AB08-12	608.399	6.08399	2.32684		2.1943	37	-0.00322004	-0.00133508	9.32067	0.256414	56.0043	10.8607	0.220793	-0.0111355	9.48586	0.0533756	0.112919	0.27455	0.108311	0.873767	12.7591	17.1532	23.5655	4.08495	0.125047	-0.0399581	-0.00352814	-0.00533484
AB08-12	608.949	6.08949	2.33234		2.55874	37	0.00562485	-0.00115331	10.0322	0.283362	54.6286	11.3422	-0.0290755	0.0287815	12.0277	-0.00151602	0.262159	0.142998	0.352534	3.35253	11.3761	18.1542	25.9038	4.03764	0.173584	0.0189695	-0.00390817	-0.00590948
AB08-12	609.499	6.09499	2.33784		2.72858	37	0.0114488	-0.00230124	10.4808	0.322277	60.5189	12.3016	0.321775	0.114131	11.3029	-0.00155858	0.128594	0.478308	0.123346	2.14874	13.7068	19.9363	23.9546	4.45833	0.142405	0.019502	-0.00401789	-0.00607538
AB08-12	610.049	6.10049	2.34334		2.78259	37	0.0151726	-0.00207053	11.2414	0.319032	25.6354	11.8185	0.0402926	-0.0126345	13.6279	0.0295039	0.0579172	0.394026	0.187856	1.99714	13.4742	18.995	26.3269	4.92982	0.177799	-0.045337	0.0280215	-0.00605298
AB08-12	610.599	6.10599	2.34884		2.73789	37	-0.00331538	-0.000886659	10.6645	0.376913	45.7024	12.6421	0.111765	0.115151	13.1067	0.061328	0.058651	0.148326	0.102519	2.74995	16.3206	17.4793	28.5299	4.60161	0.2528	-0.0459114	-0.00405379	-0.00612967
AB08-12	611.149	6.11149	2.35434		2.59519	37	0.0235506	-0.00133823	12.1228	0.334	39.6866	12.3269	0.0391924	0.110605	13.5584	0.0286982	0.0563356	0.383266	0.0563449	2.22212	16.917	18.9956	23.6141	4.53033	0.277758	0.081898	-0.00389376	-0.00588769
AB08-12	611.699	6.11699	2.35984		1.96018	37	0.0105372	0.000274127	7.98682	0.243383	52.7578	9.83922	0.0806436	0.021541	10.276	0.0896365	0.0936156	0.0467289	0.0897951	1.87923	12.1087	14.3669	21.5602	3.56066	0.39237	-0.0331272	-0.002925	0.0208505
AB08-12	612.249	6.12249	2.36534		2.56187	37	0.0146716	-0.000916819	8.72633	0.307164	79.7153	11.2802	0.097079	0.0629754	13.4114	-0.00136588	0.0509441	0.0562523	0.184286	2.89412	11.3714	18.0583	25.5027	4.38615	0.219581	-0.0398785	-0.00352112	-0.00532422
AB08-12	612.799	6.12799	2.37084		2.66554	37	0.0127756	-0.000977258	12.5069	0.374356	130.982	13.0167	0.255264	0.0729525	13.5051	0.0933543	0.130549	0.317413	0.191417	3.64544	14.5655	19.7633	28.2895	4.78047	0.14457	0.0197985	-0.00407896	-0.00616773
AB08-12	613.349	6.13349	2.37634		2.88417	37	0.0149058	-0.00104868	12.285	0.323379	219.13	13.2035	0.114077	0.0304715	14.9872	0.0946976	0.20499	0.236688	0.238937	2.36131	14.3036	19.358	28.9083	5.15415	0.14665	0.0200834	-0.00413766	0.0294948
AB08-12	613.9	6.139	2.38185		2.68609	37	0.0119344	-0.00186522	9.84447	0.318688	327.759	12.4328	-0.0283479	-0.0120263	13.1496	0.0872073	0.0551293	0.13942	0.0963632	3.13188	18.0289	21.003	28.3789	4.67094	0.23762	0.0184948	-0.00381038	-0.00576161
AB08-12	614.45	6.1445	2.38735		2.40485	37	0.00885779	-0.00151237	9.90824	0.324792	437.378	11.8998	0.10265	0.1841	11.0533	0.114097	0.0538678	0.289728	0.174721	2.12478	14.0572	18.846	30.4002	4.8595	0.165367	0.0783104	-0.00372319	-0.00562977
AB08-12	615	6.15	2.39285		2.35952	37	0.00708873	-0.00106787	11.4984	0.289331	561.261	10.8504	0.0340185	0.131561	10.1387	0.129793	0.0488987	0.263002	0.122038	1.68616	13.3762	16.3192	24.9121	4.39209	0.119787	-0.0382774	-0.00337974	-0.00511045
AB08-12	615.55	6.1555	2.39835		2.02592	37	0.0108043	-0.00124174	8.6069	0.275009	602.984	10.1757	-0.0235462	0.0899026	8.36178	0.293425	0.101295	-0.0146794	0.199887	1.35181	11.013	15.018	24.3826	4.39109	0.140573	0.0665688	-0.00316495	-0.00478567
AB08-12	616.1	6.161	2.40385		2.07524	37	0.00562744	-0.000351925	9.22815	0.259769	743.937	12.2256	0.0901559	0.12729	9.96207	0.125579	0.104658	0.187056	0.224212	1.04458	11.9743	13.0097	21.674	3.87879	0.115898	-0.0370347	0.0228901	-0.00494453
AB08-12	616.65	6.1665	2.40935		1.95512	37	0.0119589	-0.00096652	7.87675	0.228737	695.904	8.91418	0.07913	0.0211366	8.38634	0.110221	0.142192	0.223343	0.0881097	1.63793	10.2488	11.801	18.2147	3.16033	0.0759711	-0.0325054	0.0200907	0.0204592
AB08-12	617.2	6.172	2.41485		1.98452	37	-0.00435216	-0.00134456	8.79902	0.246641	723.237	9.66972	0.0868167	0.22196	7.38879	0.0476382	0.0455588	0.0503058	0.0626004	1.57099	10.0977	13.8921	21.3547	3.39598	0.0833509	0.0152841	-0.0031489	-0.00476139
AB08-12	617.75	6.1775	2.42035		2.33178	37	0.00988907	-0.00117823	8.96909	0.268627	766.187	10.163	0.0338177	0.130784	8.71985	0.0508287	0.166452	0.261449	0.103143	1.91739	9.01563	13.9828	21.4084	3.99479	0.11908	-0.0380514	-0.00335979	-0.00508028
AB08-12	618.3	6.183	2.42585		2.43758	37	0.0004281	-0.0017179	9.74808	0.315768	758.31	10.4568	0.0967567	0.0627663	9.32644	0.0530925	0.050775	0.128408	0.16469	1.75086	10.0557	13.202	22.0018	3.48645	0.124384	0.0170341	-0.00350943	-0.00530654
AB08-12	618.85	6.1885	2.43135		2.39347	37	0.0153396	-0.000362519	9.5014	0.290939	686.91	10.6315	0.0362386	-0.0113632	10.3521	0.0265354	0.115229	0.205949	0.266335	2.31309	12.1185	14.0234	23.8632	3.6481	0.192214	-0.0407754	0.0252021	-0.00544396
AB08-12	619.4	6.194	2.43685		2.22035	37	0.012281	-0.0014946	9.56738	0.308345	584.127	11.0669	0.157777	0.0257776	9.24771	-0.0013578	0.0506427	0.272382	0.164261	2.1232	9.8703	13.9258	21.0478	3.6658	0.186874	0.0169897	-0.00350028	-0.00529271
AB08-12	619.95	6.1995	2.44235		2.7018	37	0.00434768	-0.00160502	10.8997	0.343044	554.798	12.3672	-0.0279647	-0.0118637	11.6267	0.0568661	0.120304	0.0600505	0.196729	3.08954	13.508	13.5764	21.9293	3.86199	0.0994967	-0.0425712	-0.00375886	-0.00568371
AB08-12	620.5	6.205	2.44785		2.64548	37	0.0157479	-0.00209709	12.1055	0.412087	485.093	12.7889	0.0408095	0.115169	11.1536	0.0298824	-0.0124431	0.231926	0.234131	1.44067	13.4626	17.2113	23.0301	3.88997	0.180079	-0.0459185	0.028381	-0.00613062
AB08-12	621.051	6.21051	2.45336		2.81454	37	0.00982903	-0.00216555	11.2123	0.483044	406.899	12.9043	-0.0307364	0.0738909	12.5221	0.0625025	-0.0126794	0.576989	0.126832	2.65433	11.4621	16.3681	22.3035	4.04576	0.1835	-0.0467907	-0.00413143	0.065148
AB08-12	621.601	6.21601	2.45886		2.70956	37	0.00388824	-0.0017136	10.1237	0.508876	287.557	11.9229	-0.0298567	0.113997	12.2885	0.122984	-0.0123165	0.229567	0.18833	3.73069	14.8783	17.9056	21.2543	4.419	0.0702187	0.14934	0.0601976	-0.00606825
AB08-12	622.151	6.22151	2.46436		2.72059	37	0.00337151	-0.00105698	9.54945	0.460781	231.211	12.1958	-0.0286669	0.271609	11.9186	0.0283997	0.123325	-0.0178718	0.15998	3.02881	14.373	15.5226	22.6772	3.75152	0.101995	0.205732	0.0269728	-0.00582643
AB08-12	622.701	6.22701	2.46986		2.47968	37	0.0039894	-0.00121208	11.3538	0.431478	194.742	11.869	0.0377838	0.0671373	11.8445	-0.00145615	0.0543109	0.292111	0.0340134	2.14226	13.6606	15.122	20.8423	3.78239	0.133046	0.0789546	0.0262767	-0.00567608
AB08-12	623.251	6.23251	2.47536		2.46117	37	0.0200103	-0.00171409	9.84869	0.414925	152.379	13.2251	0.037367	0.183567	10.7321	-0.00144009	0.183922	0.365416	0.134051	1.85213	12.2425	13.2232	21.1824	3.57235	0.164889	0.0180193	-0.00371241	0.0264635
AB08-12	623.801	6.23801	2.48086		3.01728	37	0.0112386	-0.00143782	10.6055	0.451317	124.519	13.2528	0.0396991	0.0705407	12.6908	0.212665	0.126233	0.0630099	0.121081	3.80805	13.2757	14.7715	20.8885	3.99647	0.352129	0.0191439	-0.00394411	-0.00596382
AB08-12	624.351	6.24351	2.48636		2.76253	37	0.0227321	-0.000282763	10.9894	0.408889	114.057	12.6427	-0.0288574	0.191798	14.1101	0.23924	0.124144	0.0619675	0.20301	1.51751	13.5854	13.6862	26.4044	4.10622	0.276695	0.2071	-0.00387886	-0.00586516
AB08-12	624.901	6.24901	2.49186		2.83596	37	0.010432	0.0014067	10.2322	0.378936	127.72	12.6776	0.170646	0.0278801	13.3001	0.468465	0.453124	0.372637	0.177658	0.937572	14.2074	16.5758	24.0259	4.17933	0.0662398	0.140878	0.0567866	-0.0057244
AB08-12	625.451	6.25451	2.49736		2.57956	37	0.00319454	0.00178781	10.3236	0.382986	112.293	13.1685	0.292392	0.334173	12.5428	0.706714	0.372963	0.208849	0.0528318	1.95253	11.6247	15.8641	24.7598	4.55826	0.129401	0.0177212	-0.00365099	0.0575719
AB08-12	626.001	6.26001	2.50286		2.67301	37	0.0123261	0.00242871	9.9034	0.347394	105.11	12.5135	0.0384588	0.309526	12.4725	0.976747	0.65835	0.376093	0.199975	2.31767	15.5567	17.5573	27.5762	4.46719	0.169707	0.204004	-0.00382089	-0.0057775
AB08-12	626.551	6.26551	2.50836		3.09622	37	0.0123981	0.00323138	9.88698	0.333105	122.83	12.9686	0.317014	0.195733	14.0913	1.01191	0.54321	0.144837	0.228588	3.11149	12.9638	19.3111	28.4676	5.14412	0.282371	0.211348	-0.00395844	-0.00598548
AB08-12	627.101	6.27101	2.51386		2.93861	37	0.0253455	0.00185004	10.2287	0.340515	93.2815	12.3689	0.175261	0.110446	14.3252	0.903446	0.738126	0.0621159	0.203496	2.49803	13.1758	20.9131	27.5631	5.163	0.137807	0.08178	0.027217	0.0277162
AB08-12	627.652	6.27652	2.51937		3.0476	37	0.0299572	0.00163918	10.1588	0.35652	132.731	12.518	0.0399204	0.321288	13.3781	0.829247	0.335599	0.390386	0.121756	2.12105	13.6203	18.7535	29.3356	4.86182	-0.00177936	0.0834194	0.0277627	0.0282719
AB08-12	628.202	6.28202	2.52487		2.81694	37	0.00768232	0.0017179	10.8741	0.335478	102.371	12.7112	0.508445	0.189599	13.6497	0.50423	0.593433	0.377423	0.0554858	2.46349	14.6515	18.962	26.4952	4.70038	0.204712	0.0186114	0.0268408	-0.00579792
AB08-12	628.752	6.28752	2.53037		2.27949	37	0.00595065	0.000261846	9.60811	0.303181	78.6658	10.3059	-0.0243942	0.231126	9.98926	0.278554	0.21995	0.255157	0.0829232	1.28281	12.5291	15.0124	22.7409	4.11242	0.204479	0.0159153	-0.00327894	0.0233736
AB08-12	629.302	6.29302	2.53587		2.56682	37	0.0103874	-0.000420002	10.2342	0.347463	86.2405	12.6564	0.039281	0.151913	12.8604	0.210425	0.0564631	0.142793	0.183139	3.4878	15.0895	16.1768	26.2662	4.86131	0.243369	-0.0441987	-0.00390257	0.027819
AB08-12	629.852	6.29852	2.54137		2.59566	37	0.0105102	0.000260595	10.7712	0.355631	77.6393	12.8191	0.0397453	0.153708	11.5994	0.243547	0.126379	0.144481	0.185304	1.97001	14.9086	17.4864	29.1059	4.99716	0.0690904	0.0191662	-0.00394869	0.0281478
AB08-12	630.402	6.30402	2.54687		2.76867	37	0.00577689	-0.00151886	11.305	0.37285	73.482	12.9846	0.110663	-0.0126683	12.6024	0.0607231	0.269245	0.229603	0.231785	2.14657	15.1545	15.7009	27.5295	4.68138	0.322337	-0.0454586	-0.00401381	-0.00606922
AB08-12	630.952	6.30952	2.55237		2.79864	37	0.0174336	-0.0012347	11.7147	0.431001	82.2656	13.3703	0.115355	-0.0132054	13.9829	0.0957578	0.0605346	0.411833	0.105811	4.18982	16.2728	19.0167	26.2308	5.16446	0.336003	0.0203082	0.0292879	-0.00632653
AB08-12	631.502	6.31502	2.55787		2.9302	37	0.00658465	-0.00170001	11.9823	0.353042	105.859	13.1912	0.0407351	-0.0127732	15.1623	0.0612257	0.0585531	0.398353	0.0804554	2.74536	13.438	18.3269	26.8242	4.24987	0.252378	-0.0458348	-0.00404703	-0.00611945
AB08-12	632.052	6.32052	2.56337		2.50853	37	0.0115774	-0.00111643	9.48861	0.381724	89.6808	12.3599	-0.0275	0.0661103	12.3534	0.0559211	0.118305	0.135249	0.233452	2.5075	13.3676	16.1229	23.4587	4.52075	0.230512	-0.0418637	-0.0036964	-0.00558926
AB08-12	632.602	6.32602	2.56887		2.6062	37	-0.00210017	-0.00197167	10.8148	0.386019	84.4289	12.5083	0.176558	-0.0123626	12.6642	0.028869	-0.0120211	0.0625757	0.162624	2.79769	12.6497	17.4762	28.7715	5.12346	0.0333887	0.019012	-0.00391693	-0.00592272
AB08-12	633.152	6.33152	2.57437		2.63549	37	0.00787408	-0.000422966	10.557	0.344862	110.24	12.6577	0.108355	0.152985	13.7461	0.0289661	-0.0120615	0.629888	0.120651	2.94817	14.6597	17.9283	27.4583	4.90675	0.104029	0.019076	0.0275108	-0.00594265
AB08-12	633.702	6.33702	2.57987		2.53433	37	0.00409267	-0.000868993	10.8571	0.38877	120.538	13.0844	0.30841	0.0688753	12.5708	0.028383	-0.0118187	0.140906	0.0348939	1.50661	16.2924	17.5674	27.2012	4.97178	0.343816	-0.0436146	-0.003851	0.0274514
AB08-12	634.252	6.34252	2.58537		2.73181	37	0.00484166	-0.00135774	10.8187	0.386872	99.1782	13.5688	0.174518	-0.0122197	12.2163	0.0285354	0.123914	0.0618526	0.160745	3.04329	13.4722	19.2108	24.571	4.72414	0.241442	0.0187923	-0.00387167	-0.00585428
AB08-12	634.803	6.34803	2.59088		2.67313	37	0.0109614	-0.000685233	9.75581	0.400246	103.454	12.2222	0.0374846	-0.011754	11.8671	-0.00144462	0.184501	0.136263	0.19491	1.45696	13.5524	18.3539	27.0682	4.64954	0.232239	-0.0421774	-0.0037241	0.0265468
AB08-12	635.353	6.35353	2.59638		2.57913	37	-0.00130513	-0.00133966	10.312	0.346052	120.293	12.372	0.0377059	0.10641	12.8695	-0.00145315	0.054199	0.0598463	0.19606	2.54121	13.2916	18.8372	26.3643	4.44349	0.334449	-0.0424264	-0.00374608	-0.00566439
AB08-12	635.903	6.35903	2.60188		2.81107	37	-0.00489651	-0.00201893	10.0204	0.362527	127.204	12.143	0.17133	-0.0119965	13.7085	-0.00147443	0.0549929	0.0607229	0.0961249	2.30558	13.3126	17.5929	28.9906	4.58393	0.271138	0.141443	-0.00380096	-0.00574736
AB08-12	636.453	6.36453	2.60738		2.45663	37	0.0172961	-0.00120581	10.0637	0.330201	109.478	13.3317	0.164792	0.0653861	13.2991	-0.00141817	0.0528943	0.284492	0.151787	2.08638	12.1393	17.165	24.7931	4.33652	0.227987	0.136045	0.0255914	-0.00552803
AB08-12	637.003	6.37003	2.61288		2.55057	37	0.0113369	-0.00186456	11.5147	0.415644	116.99	12.6817	0.0400461	0.0293	15.2776	-0.00154334	0.0575629	0.227588	0.122139	1.84213	16.0178	18.1494	31.67	4.87713	0.21241	0.0836822	-0.00397859	-0.00601595
AB08-12	637.553	6.37553	2.61838		2.62635	37	0.00683731	-0.00105957	10.0262	0.366767	108.745	14.864	-0.028029	0.186292	10.8914	0.0277677	0.0545089	0.448502	0.13604	2.28529	14.9109	17.6263	26.7079	4.88533	0.0659202	0.0182867	-0.00376751	-0.00569678
AB08-12	638.103	6.38103	2.62388		2.59803	37	0.00235304	-0.00164107	11.0667	0.370692	96.3732	13.4337	-0.0295521	0.0292533	12.7195	-0.00154088	0.0574711	0.145342	0.207897	3.26492	14.7265	19.9744	30.0937	5.10571	0.212072	0.0192805	-0.00397224	-0.00600636
AB08-12	638.653	6.38653	2.62938		2.42791	37	0.00493819	-0.00251185	11.6703	0.344978	112.973	11.9824	0.165567	0.0270502	11.8758	0.0270718	-0.0112727	0.134397	0.132631	1.96435	13.1997	17.001	26.9804	5.10649	0.294974	-0.0415997	-0.00367309	-0.00555402
AB08-12	639.203	6.39203	2.63488		2.67505	37	0.00675844	-0.00154081	10.3315	0.378947	123.985	13.5305	-0.0292172	-0.0123951	15.1414	0.0594131	-0.0120527	0.22465	0.163052	2.10026	14.0237	18.3081	29.2491	4.9255	0.244906	-0.0444779	-0.00392722	0.0619279
AB08-12	639.753	6.39753	2.64038		2.59744	37	0.00914058	-0.00111594	10.5089	0.361589	113.64	11.9312	0.101867	0.02721	12.7507	-0.00143325	-0.0113393	0.211354	0.0734527	1.97595	14.034	17.9019	27.4234	4.6549	0.197259	-0.0418454	-0.00369479	-0.00558682
AB08-12	640.303	6.40303	2.64588		2.74253	37	0.0121205	-0.00138391	11.1999	0.369426	104.363	12.5659	0.106692	-0.0122138	14.1373	0.0285217	-0.0118765	0.141594	0.097866	2.90293	13.6417	17.2659	29.0195	4.82049	0.206602	0.0187833	0.0270886	-0.00585146
AB08-12	640.853	6.40853	2.65138		2.75121	37	0.0141847	-0.00146831	9.98017	0.351491	85.7377	12.4919	0.0376692	0.0275609	13.672	0.0275829	-0.0114856	0.21408	0.256604	2.27008	12.5117	16.3237	26.7226	4.67243	0.266963	-0.0423851	-0.00374243	-0.00565887
AB08-12	641.404	6.41404	2.65689		2.66297	37	0.0155328	-0.00182948	10.5186	0.393424	92.5999	12.7181	0.0392927	0.151958	14.9901	0.0590578	0.193401	0.384248	0.183194	1.80747	16.0716	17.4173	25.6736	4.78538	0.243442	-0.0442119	0.0273261	0.0278273
AB08-12	641.954	6.41954	2.66239		2.8022	37	0.0103503	-0.00106668	10.23	0.373556	68.0356	13.1295	0.0391407	-0.0122732	13.1168	0.0286604	-0.0119342	0.142283	0.0983421	1.80047	13.2658	16.3132	26.7704	4.5574	0.172716	0.0188746	0.0272204	0.0277197
AB08-12	642.504	6.42504	2.66789		2.4738	37	0.00153301	-0.00156537	11.7441	0.351643	52.9631	12.3334	-0.028189	0.0677668	13.3115	0.0573223	0.121269	0.0605322	0.0753261	2.16234	13.444	16.4007	24.6283	4.35481	0.304284	-0.0429127	-0.00378902	-0.00572931
AB08-12	643.054	6.43054	2.67339		2.83147	37	0.00877911	-0.00109897	11.2061	0.353613	52.7507	13.693	-0.0298058	-0.0126447	12.143	0.029528	-0.0122955	0.394347	0.188009	2.57396	13.3029	17.2073	24.912	4.40013	0.141995	0.019446	-0.00400634	-0.00605791
AB08-12	643.604	6.43604	2.67889		2.83165	37	0.00687747	-0.0018729	12.8306	0.379114	63.4371	14.5455	0.0402254	0.11352	16.4027	0.0294547	0.0578205	0.55813	0.338873	3.14133	16.4531	16.8984	27.5123	4.9895	0.177502	0.0193977	-0.00399639	-0.00604287
AB08-12	644.154	6.44154	2.68439		2.62545	37	0.00331749	-0.00138219	10.6789	0.360978	50.9475	12.3193	0.0381632	0.0279224	13.7924	-0.00147077	-0.0116362	0.216887	0.218949	2.29986	13.5391	16.7272	25.4217	4.41137	0.168402	0.0184033	-0.00379152	-0.00573309
AB08-12	644.704	6.44704	2.68989		2.70155	37	0.00781507	-0.00163852	11.5381	0.381402	79.8591	13.7773	0.0392617	-0.0123112	14.0075	0.028749	0.124842	0.303538	0.119747	2.36606	14.3724	15.1933	27.6517	4.64893	0.13825	-0.044177	-0.00390065	-0.00589811
AB08-12	645.254	6.45254	2.69539		2.5066	37	0.0137633	-0.00143481	10.5286	0.342369	26.8656	12.2307	0.0374785	-0.011752	13.3128	0.0274433	-0.0114274	0.136241	0.0740234	3.06046	12.1097	14.8759	28.6856	4.8388	0.165381	0.0180731	-0.00372349	-0.00563023
AB08-12	645.804	6.45804	2.70089		2.36944	37	0.0141987	-0.00160822	9.89459	0.314993	25.8471	10.2787	-0.024793	0.129724	12.33	0.0762712	0.0482158	-0.0154567	0.138362	1.66262	12.2033	13.203	24.0517	3.56564	0.088212	0.0161755	-0.00333254	-0.00503908
AB08-12	646.354	6.46354	2.70639		2.11828	37	0.00498576	-0.000733676	8.10526	0.340204	27.8044	10.251	0.0348679	0.0255114	11.0925	0.0255317	-0.0106314	0.126751	0.143825	1.97694	10.8722	13.7243	22.1619	3.93226	0.184944	0.0728616	-0.00346413	-0.00523805
AB08-12	646.904	6.46904	2.71189		2.10664	37	0.00988406	-0.000869853	8.75696	0.371707	42.8353	10.0364	-0.0242032	0.0239585	10.1639	0.0996965	0.0470689	0.119036	0.170268	1.8566	11.0244	12.8889	21.6463	3.38869	0.202878	0.121062	-0.00325327	0.0231906
AB08-12	647.454	6.47454	2.71739		1.91992	37	8.89369e-05	-3.3084e-05	8.67844	0.342376	4.86396	9.41617	0.0318613	-0.00999066	9.10164	0.293469	0.0457979	0.181073	0.114299	0.783938	9.35802	11.9079	19.6831	3.52147	0.140594	-0.0358501	0.0474813	0.0499151
AB08-12	648.004	6.48004	2.72289		1.72678	37	0.0182765	-0.000844561	7.0603	0.302406	26.7014	8.29542	0.0294994	0.052417	7.46971	0.0443383	0.0424029	-0.0135932	0.105827	1.0414	8.531	12.0016	17.999	3.48469	0.103874	0.0142254	0.0205154	-0.00443157
AB08-12	648.555	6.48555	2.7284		1.82316	37	0.0154768	-0.000326285	8.37966	0.290797	33.8921	9.72145	-0.0199703	0.0762495	10.8088	0.103086	0.0859121	0.43022	0.0678852	1.72459	10.5017	11.9319	20.1295	3.41225	0.143311	0.0564594	-0.00268431	-0.00405889
AB08-12	649.105	6.49105	2.7339		1.8274	37	0.00732623	-0.000509915	7.69418	0.250852	40.8567	9.42126	-0.0185178	0.123077	8.70585	0.211453	0.123315	0.0910739	0.103342	0.616435	6.849	10.3176	17.9005	2.83953	0.244558	0.132896	-0.00248907	0.0177431
AB08-12	649.655	6.49655	2.7394		1.7829	37	0.0125001	-0.00134531	7.10621	0.232957	60.3232	8.64319	-0.0213564	0.0815417	8.43247	0.0879698	0.142217	0.105034	0.0881255	1.43216	9.07473	11.6119	22.4831	3.2504	0.101742	0.246156	0.0430592	-0.0043406
AB08-12	650.205	6.50205	2.7449		2.21324	37	0.00874735	-0.000224722	9.25453	0.280534	62.3646	10.2158	-0.0253436	0.132604	9.10599	0.18368	0.109028	0.124644	0.123006	1.08819	10.3033	14.9721	22.1422	3.91523	0.120737	0.181882	-0.00340655	-0.00515098
AB08-12	650.755	6.50755	2.7504		2.20998	37	0.010739	-0.000405602	9.34007	0.311655	61.8621	11.4368	0.0379342	0.107054	11.4815	0.20321	0.451088	0.293274	0.0953107	1.88025	13.5435	17.5694	23.6276	4.3849	0.167392	0.140245	-0.00376876	0.0268652
AB08-12	651.305	6.51305	2.7559		2.16504	37	-0.00511984	-0.000878572	8.95601	0.312501	58.7753	10.8789	0.095573	0.0984682	10.9379	0.213806	-0.0106387	0.126837	0.20018	1.85386	11.0373	15.2356	20.2237	4.2592	0.247279	0.0729113	0.0242655	0.0247105
AB08-12	651.855	6.51855	2.7614		2.45019	37	0.00118699	-0.000702943	11.4914	0.357499	111.304	11.6782	0.0384534	-0.0120577	14.7293	0.176353	0.0552734	0.0610327	0.199947	2.45446	12.7722	17.7462	27.0824	4.86719	0.135403	0.203975	-0.00382035	0.0272329
AB08-12	652.405	6.52405	2.7669		2.27539	37	0.01669	-0.000624661	9.91653	0.345549	76.9949	11.3793	0.0972628	0.0630947	11.5705	0.108109	-0.0108268	0.274522	0.146468	1.88664	13.0787	16.6809	26.1839	4.87441	0.0617258	0.131278	0.0246945	-0.0053343
AB08-12	652.955	6.52955	2.7724		2.29039	37	0.0106439	-0.00147768	10.071	0.315261	75.5889	11.2052	0.0332103	0.0242985	13.3883	0.0499157	-0.010126	0.460795	0.190533	2.23822	11.4059	16.5912	22.2068	4.59637	0.235362	0.0160148	-0.00329944	-0.00498903
AB08-12	653.505	6.53505	2.7779		2.52583	37	0.013502	-0.00143314	10.1261	0.381923	72.8091	12.2066	0.0367669	0.10376	14.3105	0.0269223	0.116909	0.28425	0.112138	2.47793	13.0437	16.1152	26.1761	4.75728	0.227793	0.01773	0.0255696	-0.00552333
AB08-12	654.055	6.54055	2.7834		2.55897	37	0.0185224	-0.00147713	9.82095	0.373943	89.307	12.894	-0.0280097	0.0673358	14.1053	-0.00146045	0.0544715	0.137756	0.135946	2.55398	14.9007	17.4261	26.9795	4.72193	0.268567	-0.0426397	0.0263544	-0.00569287
AB08-12	654.605	6.54605	2.7889		2.63455	37	0.0227588	-0.00152609	10.7759	0.37832	101.011	12.6159	0.0384719	0.06836	13.6063	0.0281707	0.0553	0.061062	0.117338	2.45564	12.5176	20.1757	24.6482	5.10788	0.20406	0.0185521	-0.00382218	-0.00577946
AB08-12	655.156	6.55156	2.79441		2.39183	37	-0.000928237	-0.00138523	10.0057	0.368925	95.7524	12.4571	0.036846	-0.0115537	13.7147	0.0269801	0.0529629	0.209401	0.151984	1.9577	12.5714	16.5771	22.0121	4.48739	0.195436	0.0177681	-0.00366065	-0.00553521
AB08-12	655.706	6.55706	2.79991		2.29724	37	0.00909283	-0.00120293	9.00111	0.34473	79.166	11.3982	0.14874	-0.0104147	12.2601	-0.00128002	-0.0101271	0.324801	0.119151	1.76471	10.9568	14.393	24.4072	4.23202	0.146562	-0.0373719	-0.00329979	-0.00498955
AB08-12	656.256	6.56256	2.80541		2.41077	37	0.00514046	-0.00150161	10.5784	0.327842	90.4222	11.0366	0.151133	0.342163	11.4665	0.0247119	-0.01029	0.260912	0.121069	1.79311	11.2857	13.9541	22.3949	4.04356	0.118835	0.0162743	-0.00335289	-0.00506985
AB08-12	656.806	6.56806	2.81091		2.61553	37	0.0121937	-0.00106793	11.138	0.383677	122.91	12.2286	0.107337	0.0696295	14.1016	0.0286939	0.124602	0.062196	0.182698	2.92045	11.9522	15.8779	23.1114	4.3862	0.277715	0.144874	-0.00389317	-0.00588679
AB08-12	657.356	6.57356	2.81641		2.67784	37	0.0419991	-0.00248635	11.1408	0.366281	119.079	12.4189	-0.0288037	0.0692445	13.9635	-0.00150185	-0.0118821	0.30128	0.1398	2.76534	11.8861	16.5643	24.6699	4.19737	0.27618	-0.0438484	-0.00387164	-0.00585424
AB08-12	657.906	6.57906	2.82191		2.62881	37	0.00402018	-0.00103765	10.7486	0.372148	120.448	12.1096	-0.0281426	0.027858	13.2308	-0.00146738	0.0547299	0.0604326	0.218444	2.02301	12.3025	17.8867	21.1967	4.49773	0.134072	-0.042842	0.0264795	-0.00571988
AB08-12	658.456	6.58456	2.82741		2.61065	37	0.0149791	-0.00150538	10.9417	0.517682	145.493	13.3989	0.182665	-0.0127902	13.7328	-0.00157198	0.129699	0.315347	0.146328	3.47626	12.995	16.5273	24.4715	4.42778	0.17999	-0.0458957	-0.00405241	-0.00612758
AB08-12	659.006	6.59006	2.83291		2.65228	37	0.00206302	-0.00173848	10.7843	0.3887	194.527	12.7916	-0.0307899	0.0304785	13.3166	-0.00160541	0.0598782	0.0661172	0.127052	1.91622	14.401	16.0513	26.7947	4.60412	0.295224	0.020088	-0.00413861	-0.00625792
AB08-12	659.556	6.59556	2.83841		2.55703	37	0.00629127	-0.00163841	9.98773	0.364651	203.984	11.7649	-0.0305287	0.03022	13.2037	0.0302442	0.0593703	0.234734	0.281362	2.19454	13.1589	16.2574	32.3494	4.93718	0.40318	0.0863097	-0.00410351	-0.00620485
AB08-12	660.106	6.60106	2.84391		2.62706	37	0.0020691	-0.0018302	10.6205	0.405151	260.301	12.3266	-0.0308806	-0.0131007	12.9035	-0.00161014	0.0600546	0.408567	0.0600644	2.51779	14.7276	17.8278	27.6182	4.74699	0.147116	-0.0470101	-0.0041508	-0.00627636
AB08-12	660.656	6.60656	2.84941		2.66002	37	0.00669315	-0.00121396	10.708	0.339827	308.132	12.5635	0.0414063	0.0302952	13.4284	-0.00159576	0.059518	0.0657195	0.170795	2.64295	11.8808	17.7377	27.4767	4.71623	0.33036	0.0199672	-0.00411372	-0.00622029
AB08-12	661.206	6.61206	2.85491		2.60236	37	0.00292373	-0.00128802	9.89026	0.347804	274.622	12.8312	-0.0278812	0.0275993	11.4754	0.0566965	-0.0115016	0.0598713	0.155596	2.27325	12.6144	16.4713	27.4312	4.92327	0.166454	0.0181903	-0.00374765	-0.00566676
AB08-12	661.757	6.61757	2.86042		2.72872	37	0.0269004	-0.00120389	10.7358	0.356285	326.94	12.2055	-0.02554	0.0613987	11.1528	-0.00133168	0.0496686	0.196377	0.105389	2.57523	13.3518	13.8295	22.754	3.54668	0.121673	0.51655	-0.00343296	-0.00519092
[truncated: 1,127 more rows]

## Sheet: SW13-08
	Time [Sec]	Distance	Distance through grt (mm)		MgO	SiO2	P2O5	K2O	CaO	TiO2	Cr	FeO	Rb	Sr	Zr	Ce	Nd	Sm	Eu	Gd	Dy	Er	Yb	Lu	Hf	Pb	Th	U
[truncated: 152 more rows]

## Sheet: SW15-01
	Time [Sec]	distance	distance through grt (mm)		MgO	SiO2	P2O5	K2O	CaO	TiO2	Cr	FeO	Rb	Sr	Zr	Ce	Nd	Sm	Eu	Gd	Dy	Er	Yb	Lu	Hf	Pb	Th	U
[truncated: 290 more rows]

[truncated: 11 more sheets: SW15-03, SW15-05, SW15-06, SW13-27, SW12-07, AB08-18, SW12-20, AB08-15, SW12-15, SW12-16, SW12-14]
